# Supplementary material for: An integrative method for identification and prioritization of constituents of concern in produced water from onshore oil and gas extraction
Source: PubMed Central journal article supplement — Environ Int. Author manuscript; Available in PMC 2020 Oct 10. (PMC7547527; doi:10.1016/j.envint.2019.105280), 2019-11-06
Supplement: NIHMS1634982-supplement-3.pdf [file NIHMS1634982-supplement-3.pdf]

## Supporting Information

# An Integrative Method for Identification and Prioritization of Constituents of Concern in Produced Water from Onshore Oil and Gas Extraction

Cloelle Danforth<sup>a</sup>, Weihsueh A. Chiu<sup>b</sup>, Ivan Rusyn<sup>b</sup>, Kim Schultz<sup>c</sup>, Ashley Bolden<sup>c</sup>, Carol Kwiatkowski<sup>c</sup>, Elena Craft<sup>d\*</sup>

<sup>a</sup>Environmental Defense Fund, Boulder, CO, USA; <sup>b</sup>Department of Veterinary Integrative Biosciences, Texas A&M University, College Station, TX USA; <sup>c</sup>The Endocrine Disruption Exchange, Eckert CO, USA; <sup>d</sup>Environmental Defense Fund, Austin, TX USA.

|                                                                                                        |     |
|--------------------------------------------------------------------------------------------------------|-----|
| SI Table 1: Search Logic.....                                                                          | S2  |
| SI Table 2: Review papers used for hand-searching titles.....                                          | S3  |
| SI Table 3: Scaling equations by domain and component.....                                             | S5  |
| SI Figure 1: Distribution of samples by state.....                                                     | S6  |
| SI Figure 2: Sorted ToxPi profiles for all chemicals.....                                              | S7  |
| SI Table 4(A): 1198 chemicals reported as being detected in produced water, by reference (48 pages)... | S8  |
| SI Table 4(B): Final list of 129 papers used for data extraction (6 pages).....                        | S56 |
| SI Table 4(C): Summary data of 1198 chemicals (22 pages).....                                          | S62 |

The same documents are provided as an Excel file in electronic form

|                                                                                                                                                                                                                         |     |
|-------------------------------------------------------------------------------------------------------------------------------------------------------------------------------------------------------------------------|-----|
| SI Table 5(A): List of 122 chemicals selected for ToxPi prioritization based on availability of data: detected more than once; associated concentration data; having at least two types of toxicity data (3 pages)..... | S84 |
| SI Table 5(B): References for the 122 chemicals (2 pages).....                                                                                                                                                          | S87 |

The same documents are provided as an Excel file in electronic form.

SI Table 1. Search Logic

| Database       | Search Logic                                                                                                                                                                                                                                                                                                                                                                                                                                                                                                                                                                                                                                                                                                                                                                                                         |
|----------------|----------------------------------------------------------------------------------------------------------------------------------------------------------------------------------------------------------------------------------------------------------------------------------------------------------------------------------------------------------------------------------------------------------------------------------------------------------------------------------------------------------------------------------------------------------------------------------------------------------------------------------------------------------------------------------------------------------------------------------------------------------------------------------------------------------------------|
| PubMed         | <p>(brine[Title/Abstract] OR flowback[Title/Abstract] OR wastewater[Title/Abstract] OR "produced water"[Title/Abstract] OR "produced waters"[Title/Abstract] OR "formation water"[Title/Abstract]) AND (fracking[Title/Abstract] OR frac[Title/Abstract] OR frack[Title/Abstract] OR "hydraulic fracturing"[Title/Abstract] OR unconventional[Title/Abstract] OR oilfield[Title/Abstract] OR oil-field[Title/Abstract] OR "oil field"[Title/Abstract] OR "natural gas"[Title/Abstract] OR petroleum[Title/Abstract] OR shale[Title/Abstract] OR "tight gas"[Title/Abstract] OR "tight oil"[Title/Abstract] OR conventional[Title/Abstract] OR "coalbed methane"[Title/Abstract] OR "coal-bed methane"[Title/Abstract] OR "coal bed methane"[Title/Abstract] OR CBM[Title/Abstract] OR coal seam[Title/Abstract])</p> |
| Web of Science | <p>TOPIC: (fracking OR frac OR frack OR "hydraulic fracturing" OR unconventional OR oil-field OR "oil field" OR oilfield OR "natural gas" OR petroleum OR shale OR "tight gas" OR "tight oil" OR conventional OR "coalbed methane" OR "coal-bed methane" OR "coal bed methane" OR CBM OR coal seam) AND TOPIC: (brine OR flowback OR wastewater OR "produced water" OR "produced waters" OR "formation water")</p>                                                                                                                                                                                                                                                                                                                                                                                                   |

SI Table 2. Review papers used for hand-searching titles

- Abousnina RM, Nghiem LD, Bundschuh J. 2015. Comparison between oily and coal seam gas produced water with respect to quantity, characteristics and treatment technologies: a review. *Desalination and Water Treatment* 54(7):1793-1808.10.1080/19443994.2014.893541.
- Alessi DS, Zolfaghari A, Kletke S, Gehman J, Allen DM, Goss GG. 2017. Comparative analysis of hydraulic fracturing wastewater practices in unconventional shale development: Water sourcing, treatment and disposal practices. *Canadian Water Resources Journal / Revue canadienne des ressources hydriques* 42(2):105-121.10.1080/07011784.2016.1238782.
- Aljuboury DD, Palaniandy P, Aziz HA, Feroz S, Abu Amr S. 2017. Performance of the photocatalyst and Fenton processes to treat the petroleum wastewater - A review. 396-411.
- Alley B, Beebe A, Rodgers J, Jr., Castle JW. 2011. Chemical and physical characterization of produced waters from conventional and unconventional fossil fuel resources. *Chemosphere* 85(1):74-82.10.1016/j.chemosphere.2011.05.043.
- Al-Muntasheri GA. 2014. A Critical Review of Hydraulic-Fracturing Fluids for Moderate- to Ultralow-Permeability Formations Over the Last Decade. *SPE-169552-PA* 29(04):243-260.10.2118/169552-PA.
- Annevelink MPJA, Meesters JAJ, Hendriks AJ. 2016. Environmental contamination due to shale gas development. *Science of The Total Environment* 550:431-438.<https://doi.org/10.1016/j.scitotenv.2016.01.131>.
- Benko KL, Drewes JE. 2008. Produced Water in the Western United States: Geographical Distribution, Occurrence, and Composition. *Environmental Engineering Science* 25(2):239-246.10.1089/ees.2007.0026.
- Breit GN, Smith BD, McCormick MJ, Zielinski RA, Otton JK. 1998. Water produced with oil and gas - A concern for production and development of petroleum resources. Denver, CO. 10 p.
- Butkovskiy A, Bruning H, Kools SAE, Rijnaarts HHM, Van Wezel AP. 2017. Organic Pollutants in Shale Gas Flowback and Produced Waters: Identification, Potential Ecological Impact, and Implications for Treatment Strategies. *Environmental Science & Technology* 51(9):4740-4754.10.1021/acs.est.6b05640.
- Camarillo MK, Domen JK, Stringfellow WT. 2016. Physical-chemical evaluation of hydraulic fracturing chemicals in the context of produced water treatment. *Journal of Environmental Management* 183:164-174.<https://doi.org/10.1016/j.jenvman.2016.08.065>.
- Dahm KG, Guerra KL, Munakata-Marr J, Drewes JE. 2014. Trends in water quality variability for coalbed methane produced water. *Journal of Cleaner Production* 84:840-848.<https://doi.org/10.1016/j.jclepro.2014.04.033>.
- Durant B, Abualfaraj N, Olson MS, Gurian PL. 2016. Assessing dermal exposure risk to workers from flowback water during shale gas hydraulic fracturing activity. *Journal of Natural Gas Science and Engineering* 34:969-978.<https://doi.org/10.1016/j.jngse.2016.07.051>.
- Elliott EG, Ettinger AS, Leaderer BP, Bracken MB, Deziel NC. 2016. A systematic evaluation of chemicals in hydraulic-fracturing fluids and wastewater for reproductive and developmental toxicity. *Journal Of Exposure Science And Environmental Epidemiology* 27:90.10.1038/jes.2015.81.
- Elliott EG, Trinh P, Ma X, Leaderer BP, Ward MH, Deziel NC. 2017. Unconventional oil and gas development and risk of childhood leukemia: Assessing the evidence. *Science of The Total Environment* 576:138-147.<https://doi.org/10.1016/j.scitotenv.2016.10.072>.
- Estrada JM, Bhamidimarri R. 2016. A review of the issues and treatment options for wastewater from shale gas extraction by hydraulic fracturing. *Fuel* 182:292-303.<https://doi.org/10.1016/j.fuel.2016.05.051>.
- Faber A-H, Annevelink M, Gilissen HK, Schot P, Rijswick HFMW, De Voogt P, Wezel A. 2017. How to Adapt Chemical Risk Assessment for Unconventional Hydrocarbon Extraction Related to the Water System.
- Ferrer I, Thurman EM. 2015. Chemical constituents and analytical approaches for hydraulic fracturing waters. *Trends in Environmental Analytical Chemistry* 5:18-25.<https://doi.org/10.1016/j.teac.2015.01.003>.
- Fillo J, M. Koraido S, M. Evans J. 1992. Sources, Characteristics, and Management of Produced Waters from Natural Gas Production and Storage Operations. p 151-161.
- Fisher CA, Jack RF. 2015. Analysis of Ions in Hydraulic Fracturing Wastewaters Using Ion Chromatography. *Hydraulic Fracturing: Environmental Issues: American Chemical Society*. p 135-150.
- Flewelling SA, Sharma M. 2014. Constraints on Upward Migration of Hydraulic Fracturing Fluid and Brine. *Groundwater* 52(1):9-19.10.1111/gwat.12095.

- Gaspar J, Mathieu J, Yang Y, Tomson R, Leyris JD, Gregory KB, Alvarez PJJ. 2014. Microbial Dynamics and Control in Shale Gas Production. *Environmental Science & Technology Letters* 1(12):465-473.10.1021/ez5003242.
- Golestanbakh M, Parvini M, Pendashteh A. 2016. Integrated systems for oilfield produced water treatment: The state of the art. *Energy Sources, Part A: Recovery, Utilization, and Environmental Effects* 38(22):3404-3411.10.1080/15567036.2016.1154903.
- Haluszczak LO, Rose AW, Kump LR. 2013. Geochemical evaluation of flowback brine from Marcellus gas wells in Pennsylvania, USA. *Applied Geochemistry* 28:55-61.https://doi.org/10.1016/j.apgeochem.2012.10.002.
- Hitchon B, Perkins EH, Gunter WD. 2001. Recovery of trace metals in formation waters using acid gases from natural gas. *Applied Geochemistry* 16(13):1481-1497.https://doi.org/10.1016/S0883-2927(01)00004-X.
- Jackson RE, Reddy KJ. 2010. Coalbed natural gas product water: Geochemical transformations from outfalls to disposal ponds. 121-143 p.
- Jain P, Sharma M, Dureja P, Sarma PM, Lal B. 2017. Bioelectrochemical approaches for removal of sulfate, hydrocarbon and salinity from produced water. *Chemosphere* 166:96-108.10.1016/j.chemosphere.2016.09.081.
- Jiménez S, Micó MM, Arnaldos M, Medina F, Contreras S. 2018. State of the art of produced water treatment. *Chemosphere* 192:186-208.https://doi.org/10.1016/j.chemosphere.2017.10.139.
- Krukowski ST. 2015. Chapter 12: Iodine Production from Oilfield Brine. *Iodine Chemistry and Applications: John Wiley & Sons, Inc.*
- Lampe DJ, Stolz JF. 2015. Current perspectives on unconventional shale gas extraction in the Appalachian Basin. *Journal of environmental science and health Part A, Toxic/hazardous substances & environmental engineering* 50(5):434-446.10.1080/10934529.2015.992653.
- Luek JL, Gonsior M. 2017. Organic compounds in hydraulic fracturing fluids and wastewaters: A review. *Water research* 123:536-548.10.1016/j.watres.2017.07.012.
- Silva TLS, Morales-Torres S, Castro-Silva S, Figueiredo JL, Silva AMT. 2017. An overview on exploration and environmental impact of unconventional gas sources and treatment options for produced water. *J Environ Manage* 200:511-529.10.1016/j.jenvman.2017.06.002.
- Sullivan Graham EJ, Jakle AC, Martin FD. 2015. Reuse of oil and gas produced water in south-eastern New Mexico: resource assessment, treatment processes, and policy. *Water International* 40(5-6):809-823.10.1080/02508060.2015.1096126.
- Tellez GT, Nirmalakhandan N, Gardea-Torresdey JL. 1995. Evaluation of biokinetic coefficients in degradation of oilfield produced water under varying salt concentrations. *Water research* 29(7):1711-1718.https://doi.org/10.1016/0043-1354(94)00328-5.
- Torres L, Yadav OP, Khan E. 2016. A review on risk assessment techniques for hydraulic fracturing water and produced water management implemented in onshore unconventional oil and gas production. *Science of The Total Environment* 539:478-493.https://doi.org/10.1016/j.scitotenv.2015.09.030.
- Washburne CW. 1921. Oil-field Brines. *SPE-921269-G* 65(01):269-294.10.2118/921269-G.
- Yost EE, Stanek J, DeWoskin RS, Burgoon LD. 2016. Estimating the Potential Toxicity of Chemicals Associated with Hydraulic Fracturing Operations Using Quantitative Structure–Activity Relationship Modeling. *Environmental Science & Technology* 50(14):7732-7742.10.1021/acs.est.5b05327.
- Yost EE, Stanek J, DeWoskin RS, Burgoon LD. 2016. Overview of Chronic Oral Toxicity Values for Chemicals Present in Hydraulic Fracturing Fluids, Flowback, and Produced Waters. *Environ Sci Technol* 50(9):4788-4797.10.1021/acs.est.5b04645.

SI Table 3: Scaling equations by domain and component.

| <b>Component (Range)</b>                            | <b>Unit</b>                   | <b>Domain</b> | <b>Scaling Equation</b>                                    |
|-----------------------------------------------------|-------------------------------|---------------|------------------------------------------------------------|
| EC50 (3.7x10 <sup>-4</sup> to 1.2x10 <sup>4</sup> ) | mg/L                          | Ecotoxicity   | $-\log_{10}[\text{EC50}] + \log_{10}(\max[\text{EC50}])$   |
| AC50 (3.8x10 <sup>-5</sup> to 2.5x10 <sup>2</sup> ) | μM                            | Bioactivity   | $-\log_{10}[\text{AC50}] + \log_{10}(\max[\text{AC50}])$   |
| % active (0 to 41%)                                 | %                             | Bioactivity   | NA (Linear)                                                |
| CPV (2.3 x10 <sup>-3</sup> to 21)                   | log <sub>10</sub> kg·d/mol    | CTV           | $\log_{10}[\text{CPV}] - \log_{10}(\min[\text{CPV}])$      |
| OSF (1.9 x10 <sup>-3</sup> to 21)                   | log <sub>10</sub> kg·d/mol    | CTV           | $\log_{10}[\text{OSF}] - \log_{10}(\min[\text{OSF}])$      |
| RfD (5.8 x10 <sup>-4</sup> to 20)                   | -log <sub>10</sub> mol/(kg·d) | CTV           | $-\log_{10}[\text{RfD}] + \log_{10}(\max[\text{RfD}])$     |
| BMD (1.0 to 4.4 x10 <sup>3</sup> )                  | -log <sub>10</sub> mol/(kg·d) | CTV           | $-\log_{10}[\text{BMD}] + \log_{10}(\max[\text{BMD}])$     |
| BMDL (0.19 to 4.8 x10 <sup>2</sup> )                | -log <sub>10</sub> mol/(kg·d) | CTV           | $-\log_{10}[\text{BMDL}] + \log_{10}(\max[\text{BMDL}])$   |
| NOAEL (0.29 to 1.0 x10 <sup>3</sup> )               | -log <sub>10</sub> mol/(kg·d) | CTV           | $-\log_{10}[\text{NOAEL}] + \log_{10}(\max[\text{NOAEL}])$ |

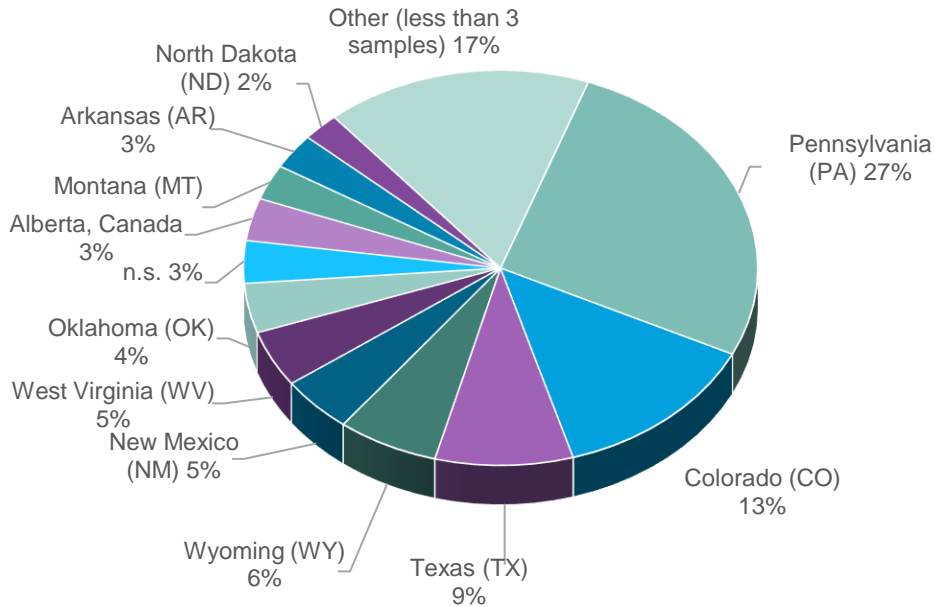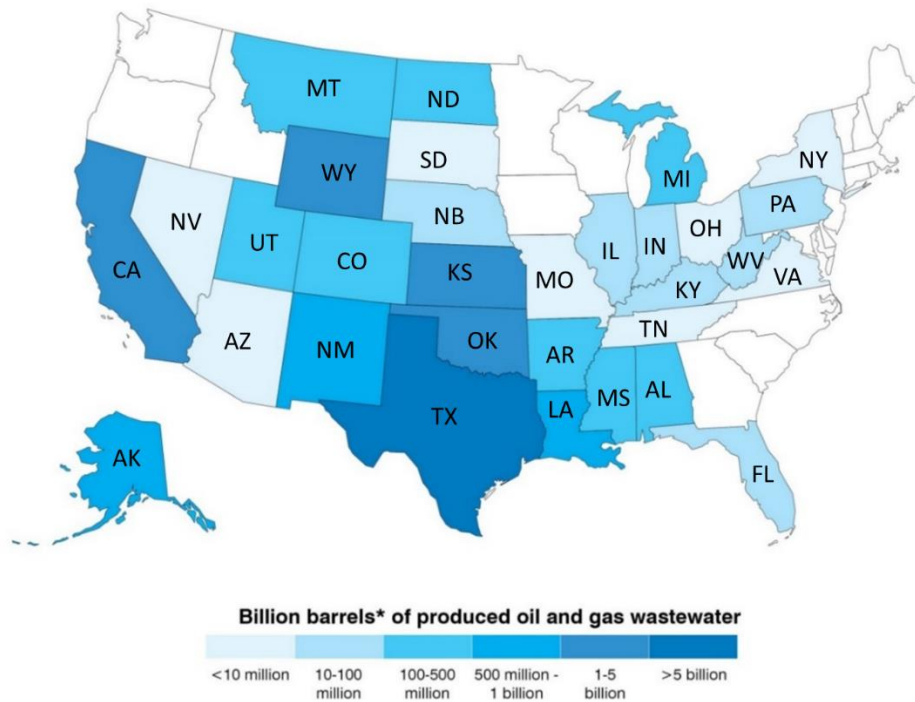

SI Figure 1. A. Distribution of samples by state. Other states/countries that represent less than 2% of total sample locations (State abbreviation, number of samples) are: Louisiana (LA, 3), Tabasco, Mexico (3), Utah (UT, 3), Alabama (AL, 3), California (CA, 2), Kansas (KS, 2), Kentucky (KY, 2), Mississippi (MS, 2), New York (NY, 2), Ohio (OH, 2), Alaska (AK, 1), British Columbia, Canada (1), Illinois (IL, 1), Indiana (IN, 1), and Nevada (NV, 1). B: Produced water intensity map developed using data from Veil 2015. \*1 barrel = 42 gallons.

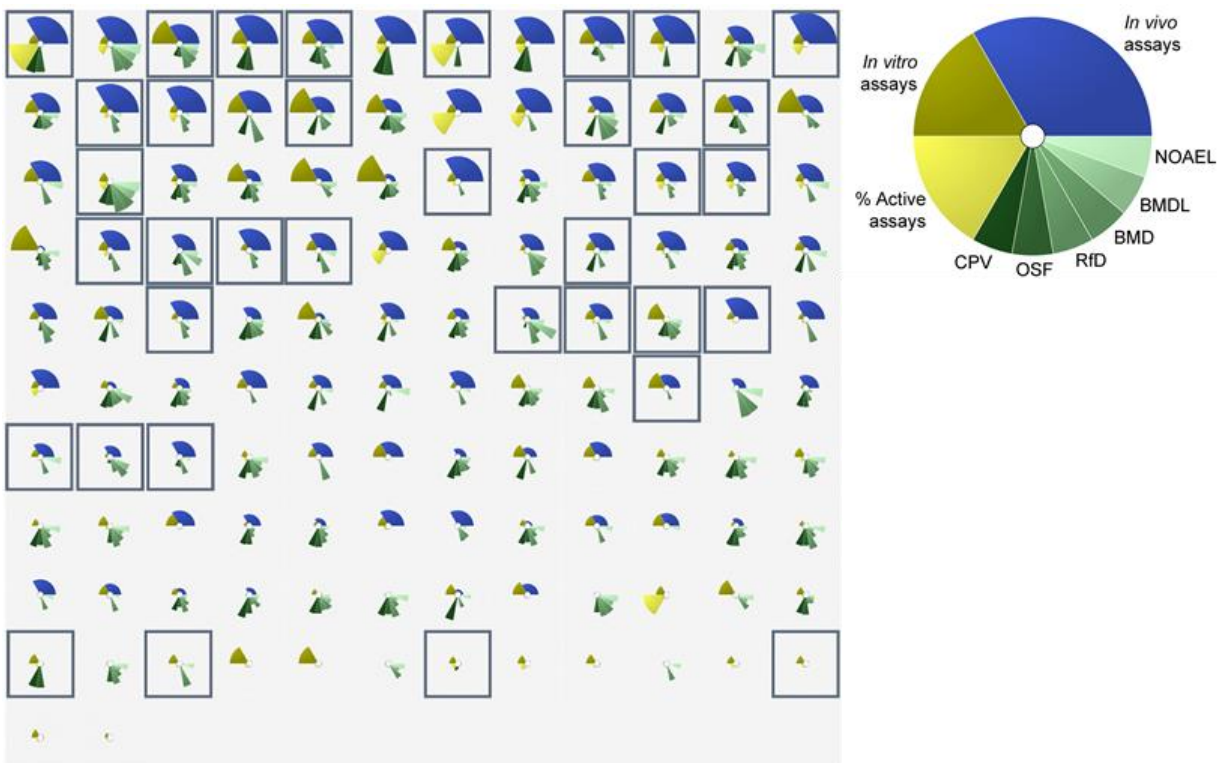

SI Figure 2. The sorted ToxPi profiles for all 122 the chemicals (highest in upper left moving to lowest at the bottom right). The the EPA's Priority Pollutant List (PPL) chemicals are denoted by a box (36 total compounds). ToxPi definitions are shown on the right. Each domain is represented by slices of a similar color: in vivo ecotoxicology endpoints (blue), in vitro high throughput screening assays (yellow), and known or conditional human health toxicity values (green). Individual slices represent data from related assays, endpoints, or analyses. The distance of each slice from the center indicates the normalized value of the component. The angle of the slice represents how that component is weighted relative to the other components in the overall ToxPi calculation. Cancer potency value (CPV), Oral slope factor (OSF), Reference dose (RfD), Rfd Benchmark dose (BMD), Rfd Benchmark dose lower limit (BMDL), Rfd No observed adverse effect level (NOAEL).

SI Table 4a: 1198 chemicals reported as being detected in produced water, by reference

| Refid | CAS        | Name                 | Conc (Max reported) | Units |
|-------|------------|----------------------|---------------------|-------|
| 1     | 7440-09-7  | Potassium            | 490                 | mg/L  |
| 1     | 14808-79-8 | Sulfate              | 800                 | mg/L  |
| 1     | 16887-00-6 | Chloride             | 138000              | mg/L  |
| 1     | 18496-25-8 | Sulfide              | 21                  | mg/L  |
| 1     | 71-52-3    | Bicarbonate          | 167                 | mg/L  |
| 1     | 7439-95-4  | Magnesium            | 2460                | mg/L  |
| 1     | 7440-23-5  | Sodium               | 69300               | mg/L  |
| 1     | 7440-70-2  | Calcium              | 13100               | mg/L  |
| 1     | 7631-86-9  | Silica               | 20                  | mg/L  |
| 2     | 7440-09-7  | Potassium            |                     |       |
| 2     | 108-88-3   | Toluene              |                     |       |
| 2     | 113-21-3   | Lactate ion(1-)      |                     |       |
| 2     | 127-18-4   | Tetrachloroethylene  |                     |       |
| 2     | 14127-61-8 | Calcium ion          |                     |       |
| 2     | 16887-00-6 | Chloride             |                     |       |
| 2     | 17341-25-2 | Sodium ion           |                     |       |
| 2     | 24959-67-9 | Bromide              |                     |       |
| 2     | 57-60-3    | Pyruvate             |                     |       |
| 2     | 71-43-2    | Benzene              |                     |       |
| 2     | 71-47-6    | Formic acid, ion(1-) |                     |       |
| 2     | 71-50-1    | Acetate              |                     |       |
| 2     | 72-03-7    | Propanoate           |                     |       |
| 2     | 7439-89-6  | Iron                 |                     |       |
| 2     | 7439-93-2  | Lithium              |                     |       |
| 2     | 7439-95-4  | Magnesium            |                     |       |
| 2     | 7439-96-5  | Manganese            |                     |       |
| 2     | 7440-24-6  | Strontium            |                     |       |
| 2     | 7440-39-3  | Barium               |                     |       |
| 2     | 7440-42-8  | Boron                |                     |       |
| 3     | 14127-61-8 | Calcium ion          | 16509.14            | mg/L  |
| 3     | 16887-00-6 | Chloride             | 115277.6            | mg/L  |
| 3     | 17341-25-2 | Sodium ion           | 47107.2             | mg/L  |
| 3     | 7439-89-6  | Iron                 | 19                  | mg/L  |
| 3     | 7439-95-4  | Magnesium            | 1820.2              | mg/L  |
| 3     | 7440-24-6  | Strontium            | 1888.39             | mg/L  |
| 3     | 7440-39-3  | Barium               | 328.26              | mg/L  |
| 4     | 12587-46-1 | Alpha particle       | 9551                | pCi/L |
| 4     | 12587-47-2 | Beta particle        | 597600              | pCi/L |
| 4     | 13982-63-3 | Radium-226           | 9280                | pCi/L |
| 4     | 14127-61-8 | Calcium ion          | 41000               | mg/L  |
| 4     | 14808-79-8 | Sulfate              | 763                 | mg/L  |
| 4     | 15117-96-1 | Uranium-235          | 20                  | pCi/L |
| 4     | 15262-20-1 | Radium-228           | 1360                | pCi/L |
| 4     | 16887-00-6 | Chloride             | 196000              | mg/L  |
| 4     | 17341-25-2 | Sodium ion           | 117000              | mg/L  |
| 4     | 24959-67-9 | Bromide              | 1990                | mg/L  |
| 4     | 7439-89-6  | Iron                 | 321                 | mg/L  |
| 4     | 7439-95-4  | Magnesium            | 2550                | mg/L  |
| 4     | 7440-24-6  | Strontium            | 8460                | mg/L  |
| 4     | 7440-39-3  | Barium               | 13800               | mg/L  |
| 4     | 7440-61-1  | Uranium              | 497                 | pCi/L |
| 5     | 7440-09-7  | Potassium            | 704                 | mg/L  |
| 5     | 14808-79-8 | Sulfate              | 3750                | mg/L  |
| 5     | 16887-00-6 | Chloride             | 25690               | mg/L  |
| 5     | 24959-67-9 | Bromide              | 57.6                | mg/L  |
| 5     | 71-52-3    | Bicarbonate          | 351                 | mg/L  |
| 5     | 7439-95-4  | Magnesium            | 525                 | mg/L  |
| 5     | 7440-23-5  | Sodium               | 18380               | mg/L  |
| 5     | 7440-24-6  | Strontium            | 38                  | mg/L  |
| 5     | 7440-70-2  | Calcium              | 1374                | mg/L  |
| 6     | 2765-11-9  | Pentadecanal         | 0.0453              | mg/L  |
| 6     | 7440-09-7  | Potassium            | 52.7                | mg/L  |
| 6     | 10486-19-8 | Tridecanal           | 0.0563              | mg/L  |
| 6     | 112-54-9   | Dodecanal            | 0.0288              | mg/L  |
| 6     | 112-88-9   | 1-Octadecene         | 0.0463              | mg/L  |
| 6     | 124-25-4   | Tetradecanal         | 0.0618              | mg/L  |
| 6     | 129-00-0   | Pyrene               | 0.00049             | mg/L  |
| 6     | 14797-55-8 | Nitrate              | 171                 | mg/L  |
| 6     | 14808-79-8 | Sulfate              | 258                 | mg/L  |
| 6     | 16887-00-6 | Chloride             | 19912               | mg/L  |
| 6     | 16984-48-8 | Fluoride             | 22.8                | mg/L  |
| 6     | 191-24-2   | Benzo(g,h,i)perylene | 0.00077             | mg/L  |
| 6     | 1921-70-6  | Norphytane           | 0.0952              | mg/L  |



SI Table 4a: 1198 chemicals reported as being detected in produced water, by reference

| Refid | CAS        | Name                            | Conc (Max reported) | Units |
|-------|------------|---------------------------------|---------------------|-------|
| 6     | 193-39-5   | Indeno(1,2,3-cd)pyrene          | 0.00076             | mg/L  |
| 6     | 205-99-2   | Benzo(b)fluoranthene            | 0.001               | mg/L  |
| 6     | 207-08-9   | Benzo(k)fluoranthene            | 0.00107             | mg/L  |
| 6     | 218-01-9   | Chrysene                        | 0.00126             | mg/L  |
| 6     | 50-32-8    | Benzo(a)pyrene                  | 0.00106             | mg/L  |
| 6     | 53-70-3    | Dibenz(a,h)anthracene           | 0.00067             | mg/L  |
| 6     | 56-55-3    | Benz(a)anthracene               | 0.00082             | mg/L  |
| 6     | 629-80-1   | Hexadecanal                     | 0.165               | mg/L  |
| 6     | 638-36-8   | 2,6,10,14-Tetramethylhexadecane | 0.0896              | mg/L  |
| 6     | 638-66-4   | Octadecanal                     | 0.094               | mg/L  |
| 6     | 7373-13-9  | 2-Octadecanone                  | 0.215               | mg/L  |
| 6     | 7439-89-6  | Iron                            | 72.2                | mg/L  |
| 6     | 7439-93-2  | Lithium                         | 10.6                | mg/L  |
| 6     | 7439-95-4  | Magnesium                       | 79.9                | mg/L  |
| 6     | 7439-96-5  | Manganese                       | 1.32                | mg/L  |
| 6     | 7440-21-3  | Silicon                         | 58.7                | mg/L  |
| 6     | 7440-23-5  | Sodium                          | 11064               | mg/L  |
| 6     | 7440-24-6  | Strontium                       | 102                 | mg/L  |
| 6     | 7440-39-3  | Barium                          | 19.3                | mg/L  |
| 6     | 7440-42-8  | Boron                           | 32.9                | mg/L  |
| 6     | 7440-70-2  | Calcium                         | 682                 | mg/L  |
| 6     | 7704-34-9  | Sulfur                          | 15.7                | mg/L  |
| 6     | 7726-95-6  | Bromine                         | 259                 | mg/L  |
| 6     | 85-01-8    | Phenanthrene                    | 0.00261             | mg/L  |
| 6     | 86-73-7    | Fluorene                        | 0.00213             | mg/L  |
| 6     | 91-20-3    | Naphthalene                     | 0.0247              | mg/L  |
| 7     | 7440-09-7  | Potassium                       | 110                 | mg/L  |
| 7     | 14797-55-8 | Nitrate                         | 10                  | mg/L  |
| 7     | 14808-79-8 | Sulfate                         | 2000                | mg/L  |
| 7     | 16887-00-6 | Chloride                        | 89690               | mg/L  |
| 7     | 18496-25-8 | Sulfide                         | 26                  | mg/L  |
| 7     | 24959-67-9 | Bromide                         | 0.02                | mg/L  |
| 7     | 71-52-3    | Bicarbonate                     | 152                 | mg/L  |
| 7     | 7439-89-6  | Iron                            | 30                  | mg/L  |
| 7     | 7439-95-4  | Magnesium                       | 1930                | mg/L  |
| 7     | 7439-96-5  | Manganese                       | 0.9                 | mg/L  |
| 7     | 7440-02-0  | Nickel                          | 0.12                | mg/L  |
| 7     | 7440-23-5  | Sodium                          | 45315               | mg/L  |
| 7     | 7440-50-8  | Copper                          | 0.03                | mg/L  |
| 7     | 7440-66-6  | Zinc                            | 0.04                | mg/L  |
| 7     | 7440-70-2  | Calcium                         | 8300                | mg/L  |
| 7     | 7631-86-9  | Silica                          | 12                  | mg/L  |
| 8     | 14808-79-8 | Sulfate                         | 2430                | mg/L  |
| 8     | 18496-25-8 | Sulfide                         | 2                   | mg/L  |
| 9     | 7440-09-7  | Potassium                       | 6                   | mg/L  |
| 9     | 7783-06-4  | Hydrogen sulfide                | 33                  | mg/L  |
| 9     | 14797-55-8 | Nitrate                         | 0.2                 | mg/L  |
| 9     | 16887-00-6 | Chloride                        | 161                 | mg/L  |
| 9     | 16984-48-8 | Fluoride                        | 4                   | mg/L  |
| 9     | 7429-90-5  | Aluminum                        | 0.0867              | mg/L  |
| 9     | 7439-89-6  | Iron                            | 1.11                | mg/L  |
| 9     | 7439-95-4  | Magnesium                       | 1.1                 | mg/L  |
| 9     | 7439-96-5  | Manganese                       | 0.0223              | mg/L  |
| 9     | 7439-98-7  | Molybdenum                      | 0.0066              | mg/L  |
| 9     | 7440-02-0  | Nickel                          | 0.0042              | mg/L  |
| 9     | 7440-23-5  | Sodium                          | 721                 | mg/L  |
| 9     | 7440-33-7  | Tungsten                        | 0.0072              | mg/L  |
| 9     | 7440-42-8  | Boron                           | 0.971               | mg/L  |
| 9     | 7440-50-8  | Copper                          | 0.0043              | mg/L  |
| 9     | 7440-66-6  | Zinc                            | 0.0211              | mg/L  |
| 9     | 7440-70-2  | Calcium                         | 13.6                | mg/L  |
| 10    | 7440-09-7  | Potassium                       | 3166                | mg/L  |
| 10    | 14808-79-8 | Sulfate                         | 131                 | mg/L  |
| 10    | 16887-00-6 | Chloride                        | 142000              | mg/L  |
| 10    | 24959-67-9 | Bromide                         | 860                 | mg/L  |
| 10    | 7439-89-6  | Iron                            | 20.5                | mg/L  |
| 10    | 7439-93-2  | Lithium                         | 55.07               | mg/L  |
| 10    | 7439-95-4  | Magnesium                       | 985.91              | mg/L  |
| 10    | 7439-96-5  | Manganese                       | 5.99                | mg/L  |
| 10    | 7440-17-7  | Rubidium                        | 6.251               | mg/L  |
| 10    | 7440-21-3  | Silicon                         | 58.39               | mg/L  |
| 10    | 7440-22-4  | Silver                          | 0.474               | mg/L  |

SI Table 4a: 1198 chemicals reported as being detected in produced water, by reference

| Refid | CAS        | Name                             | Conc (Max reported) | Units |
|-------|------------|----------------------------------|---------------------|-------|
| 10    | 7440-23-5  | Sodium                           | 63110               | mg/L  |
| 10    | 7440-24-6  | Strontium                        | 1326.6              | mg/L  |
| 10    | 7440-28-0  | Thallium                         | 0.198               | mg/L  |
| 10    | 7440-33-7  | Tungsten                         | 0.096               | mg/L  |
| 10    | 7440-36-0  | Antimony                         | 0.144               | mg/L  |
| 10    | 7440-38-2  | Arsenic                          | 0.069               | mg/L  |
| 10    | 7440-39-3  | Barium                           | 30.95               | mg/L  |
| 10    | 7440-42-8  | Boron                            | 298.49              | mg/L  |
| 10    | 7440-46-2  | Cesium                           | 1.719               | mg/L  |
| 10    | 7440-48-4  | Cobalt                           | 0.041               | mg/L  |
| 10    | 7440-56-4  | Germanium                        | 0.161               | mg/L  |
| 10    | 7440-65-5  | Yttrium                          | 0.011               | mg/L  |
| 10    | 7440-69-9  | Bismuth                          | 0.424               | mg/L  |
| 10    | 7440-70-2  | Calcium                          | 15380               | mg/L  |
| 10    | 7553-56-2  | Iodine                           | 25.43               | mg/L  |
| 10    | 7782-49-2  | Selenium                         | 2.241               | mg/L  |
| 11    | 7440-09-7  | Potassium                        | 10200               | mg/L  |
| 11    | 14808-79-8 | Sulfate                          | 694                 | mg/L  |
| 11    | 16887-00-6 | Chloride                         | 248000              | mg/L  |
| 11    | 24959-67-9 | Bromide                          | 3670                | mg/L  |
| 11    | 71-52-3    | Bicarbonate                      | 1370                | mg/L  |
| 11    | 7439-89-6  | Iron                             | 393                 | mg/L  |
| 11    | 7439-93-2  | Lithium                          | 205                 | mg/L  |
| 11    | 7439-95-4  | Magnesium                        | 3810                | mg/L  |
| 11    | 7439-96-5  | Manganese                        | 331                 | mg/L  |
| 11    | 7440-17-7  | Rubidium                         | 22.3                | mg/L  |
| 11    | 7440-21-3  | Silicon                          | 78                  | mg/L  |
| 11    | 7440-23-5  | Sodium                           | 62400               | mg/L  |
| 11    | 7440-24-6  | Strontium                        | 2750                | mg/L  |
| 11    | 7440-39-3  | Barium                           | 251                 | mg/L  |
| 11    | 7440-42-8  | Boron                            | 187                 | mg/L  |
| 11    | 7440-70-2  | Calcium                          | 55700               | mg/L  |
| 11    | 7553-56-2  | Iodine                           | 35.5                | mg/L  |
| 12    | 7440-09-7  | Potassium                        | 11100               | mg/L  |
| 12    | 13494-80-9 | Tellurium                        | 0.429               | mg/L  |
| 12    | 14808-79-8 | Sulfate                          | 259                 | mg/L  |
| 12    | 16887-00-6 | Chloride                         | 180000              | mg/L  |
| 12    | 16984-48-8 | Fluoride                         | 16.2                | mg/L  |
| 12    | 24959-67-9 | Bromide                          | 2034                | mg/L  |
| 12    | 71-52-3    | Bicarbonate                      | 1275                | mg/L  |
| 12    | 7439-89-6  | Iron                             | 223                 | mg/L  |
| 12    | 7439-93-2  | Lithium                          | 51.7                | mg/L  |
| 12    | 7439-95-4  | Magnesium                        | 1830                | mg/L  |
| 12    | 7439-96-5  | Manganese                        | 29.6                | mg/L  |
| 12    | 7440-17-7  | Rubidium                         | 13.5                | mg/L  |
| 12    | 7440-21-3  | Silicon                          | 88.1                | mg/L  |
| 12    | 7440-23-5  | Sodium                           | 82000               | mg/L  |
| 12    | 7440-24-6  | Strontium                        | 2069                | mg/L  |
| 12    | 7440-28-0  | Thallium                         | 0.505               | mg/L  |
| 12    | 7440-38-2  | Arsenic                          | 0.548               | mg/L  |
| 12    | 7440-39-3  | Barium                           | 177                 | mg/L  |
| 12    | 7440-42-8  | Boron                            | 397                 | mg/L  |
| 12    | 7440-46-2  | Cesium                           | 3.69                | mg/L  |
| 12    | 7440-56-4  | Germanium                        | 0.44                | mg/L  |
| 12    | 7440-70-2  | Calcium                          | 23000               | mg/L  |
| 12    | 7553-56-2  | Iodine                           | 43.4                | mg/L  |
| 12    | 7782-49-2  | Selenium                         | 3.74                | mg/L  |
| 13    | 7440-09-7  | Potassium                        | 1480                | mg/L  |
| 13    | 14127-61-8 | Calcium ion                      | 17100               | mg/L  |
| 13    | 14808-79-8 | Sulfate                          | 619                 | mg/L  |
| 13    | 15438-31-0 | Fe +2 ion                        | 3.3                 | mg/L  |
| 13    | 16887-00-6 | Chloride                         | 67800               | mg/L  |
| 13    | 17341-25-2 | Sodium ion                       | 41700               | mg/L  |
| 13    | 471-34-1   | Carbonic acid calcium salt (1:1) | 103026              | mg/L  |
| 13    | 7439-89-6  | Iron                             | 78                  | mg/L  |
| 13    | 7439-95-4  | Magnesium                        | 13000               | mg/L  |
| 13    | 7439-96-5  | Manganese                        | 13.3                | mg/L  |
| 13    | 7440-24-6  | Strontium                        | 4310                | mg/L  |
| 13    | 7440-39-3  | Barium                           | 3850                | mg/L  |
| 13    | 7440-70-2  | Calcium                          | 98700               | mg/L  |
| 14    | 7440-09-7  | Potassium                        | 580                 | mg/L  |
| 14    | 7783-06-4  | Hydrogen sulfide                 | 0.6                 | mg/L  |
| 14    | 13982-63-3 | Radium-226                       | 495.4954955         | pCi/L |

SI Table 4a: 1198 chemicals reported as being detected in produced water, by reference

| RefId | CAS        | Name                         | Conc (Max reported) | Units |
|-------|------------|------------------------------|---------------------|-------|
| 14    | 14798-03-9 | Ammonium                     | 224                 | mg/L  |
| 14    | 14808-79-8 | Sulfate                      | 604                 | mg/L  |
| 14    | 16887-00-6 | Chloride                     | 130000              | mg/L  |
| 14    | 18496-25-8 | Sulfide                      | 0.2                 | mg/L  |
| 14    | 24959-67-9 | Bromide                      | 13600               | mg/L  |
| 14    | 71-52-3    | Bicarbonate                  | 676                 | mg/L  |
| 14    | 7439-89-6  | Iron                         | 290                 | mg/L  |
| 14    | 7439-93-2  | Lithium                      | 53                  | mg/L  |
| 14    | 7439-95-4  | Magnesium                    | 1500                | mg/L  |
| 14    | 7439-96-5  | Manganese                    | 110                 | mg/L  |
| 14    | 7440-23-5  | Sodium                       | 52900               | mg/L  |
| 14    | 7440-24-6  | Strontium                    | 1750                | mg/L  |
| 14    | 7440-39-3  | Barium                       | 880                 | mg/L  |
| 14    | 7440-42-8  | Boron                        | 99                  | mg/L  |
| 14    | 7440-66-6  | Zinc                         | 73                  | mg/L  |
| 14    | 7440-70-2  | Calcium                      | 25500               | mg/L  |
| 14    | 7631-86-9  | Silica                       | 225                 | mg/L  |
| 15    | 7440-24-6  | Strontium                    | 2698                | mg/L  |
| 15    | 7440-70-2  | Calcium                      | 35432               | mg/L  |
| 16    | 107-21-1   | Ethylene glycol              | 0.38                | mg/L  |
| 16    | 108-88-3   | Toluene                      | 0.69                | mg/L  |
| 16    | 108-91-8   | Cyclohexylamine              | 0.034               | mg/L  |
| 16    | 108-95-2   | Phenol                       | 2.41                | mg/L  |
| 16    | 110-82-7   | Cyclohexane                  | 5.97                | mg/L  |
| 16    | 1300-71-6  | Dimethylphenol               | 1.45                | mg/L  |
| 16    | 1319-77-3  | Cresol                       | 2.74                | mg/L  |
| 16    | 142-62-1   | Hexanoic acid                | 0.22                | mg/L  |
| 16    | 65-85-0    | Benzoic acid                 | 1.03                | mg/L  |
| 16    | 86-55-5    | 1-Naphthalenecarboxylic acid | 0.96                | mg/L  |
| 17    | 14127-61-8 | Calcium ion                  | 20800               | mg/L  |
| 17    | 16887-00-6 | Chloride                     | 159000              | mg/L  |
| 17    | 17341-25-2 | Sodium ion                   | 49400               | mg/L  |
| 17    | 7439-89-6  | Iron                         | 123                 | mg/L  |
| 17    | 7439-95-4  | Magnesium                    | 1992                | mg/L  |
| 17    | 7440-24-6  | Strontium                    | 5230                | mg/L  |
| 17    | 7440-39-3  | Barium                       | 12000               | mg/L  |
| 18    | 7440-17-7  | Rubidium                     | 1.9                 | mg/L  |
| 18    | 7440-24-6  | Strontium                    | 660                 | mg/L  |
| 19    | 7440-09-7  | Potassium                    | 3659                | mg/L  |
| 19    | 14808-79-8 | Sulfate                      | 260                 | mg/L  |
| 19    | 16887-00-6 | Chloride                     | 52364               | mg/L  |
| 19    | 16984-48-8 | Fluoride                     | 1.43                | mg/L  |
| 19    | 24959-67-9 | Bromide                      | 203                 | mg/L  |
| 19    | 71-52-3    | Bicarbonate                  | 8864                | mg/L  |
| 19    | 7439-89-6  | Iron                         | 64.4                | mg/L  |
| 19    | 7439-93-2  | Lithium                      | 8.9                 | mg/L  |
| 19    | 7439-95-4  | Magnesium                    | 919                 | mg/L  |
| 19    | 7439-96-5  | Manganese                    | 1.72                | mg/L  |
| 19    | 7440-21-3  | Silicon                      | 28.9                | mg/L  |
| 19    | 7440-23-5  | Sodium                       | 32013               | mg/L  |
| 19    | 7440-24-6  | Strontium                    | 365                 | mg/L  |
| 19    | 7440-39-3  | Barium                       | 213                 | mg/L  |
| 19    | 7440-70-2  | Calcium                      | 2956                | mg/L  |
| 20    | 14808-79-8 | Sulfate                      | 260                 | mg/L  |
| 20    | 16887-00-6 | Chloride                     | 52364               | mg/L  |
| 20    | 71-52-3    | Bicarbonate                  | 8864                | mg/L  |
| 20    | 7429-91-6  | Dysprosium                   | 0.0004              | mg/L  |
| 20    | 7439-89-6  | Iron                         | 63.1                | mg/L  |
| 20    | 7439-91-0  | Lanthanum                    | 0.00251             | mg/L  |
| 20    | 7439-92-1  | Lead                         | 0.0984              | mg/L  |
| 20    | 7439-94-3  | Lutetium                     | 0.00045             | mg/L  |
| 20    | 7439-95-4  | Magnesium                    | 918.9               | mg/L  |
| 20    | 7439-97-6  | Mercury                      | 0.0138              | mg/L  |
| 20    | 7439-98-7  | Molybdenum                   | 0.4484              | mg/L  |
| 20    | 7440-00-8  | Neodymium                    | 0.00051             | mg/L  |
| 20    | 7440-02-0  | Nickel                       | 0.0822              | mg/L  |
| 20    | 7440-10-0  | Praseodymium                 | 0.0004              | mg/L  |
| 20    | 7440-19-9  | Samarium                     | 0.0012              | mg/L  |
| 20    | 7440-23-5  | Sodium                       | 32013               | mg/L  |
| 20    | 7440-27-9  | Terbium                      | 0.0004              | mg/L  |
| 20    | 7440-30-4  | Thulium                      | 0.0004              | mg/L  |
| 20    | 7440-36-0  | Antimony                     | 0.00526             | mg/L  |

SI Table 4a: 1198 chemicals reported as being detected in produced water, by reference

| Refid | CAS         | Name                   | Conc (Max reported) | Units |
|-------|-------------|------------------------|---------------------|-------|
| 20    | 7440-38-2   | Arsenic                | 0.1647              | mg/L  |
| 20    | 7440-42-8   | Boron                  | 30.6                | mg/L  |
| 20    | 7440-43-9   | Cadmium                | 0.07674             | mg/L  |
| 20    | 7440-45-1   | Cerium                 | 0.00041             | mg/L  |
| 20    | 7440-47-3   | Chromium               | 0.1487              | mg/L  |
| 20    | 7440-48-4   | Cobalt                 | 0.00978             | mg/L  |
| 20    | 7440-50-8   | Copper                 | 1.4475              | mg/L  |
| 20    | 7440-52-0   | Erbium                 | 0.0004              | mg/L  |
| 20    | 7440-53-1   | Europium               | 0.01317             | mg/L  |
| 20    | 7440-54-2   | Gadolinium             | 0.00277             | mg/L  |
| 20    | 7440-60-0   | Holmium                | 0.0004              | mg/L  |
| 20    | 7440-62-2   | Vanadium               | 0.2901              | mg/L  |
| 20    | 7440-64-4   | Ytterbium              | 0.00278             | mg/L  |
| 20    | 7440-65-5   | Yttrium                | 0.00279             | mg/L  |
| 20    | 7440-66-6   | Zinc                   | 5.6385              | mg/L  |
| 20    | 7440-70-2   | Calcium                | 2956                | mg/L  |
| 20    | 7782-49-2   | Selenium               | 1.2704              | mg/L  |
| 21    | 7440-09-7   | Potassium              | 66000               | mg/L  |
| 21    | 100-41-4    | Ethylbenzene           | 1.2                 | mg/L  |
| 21    | 108-88-3    | Toluene                | 11                  | mg/L  |
| 21    | 120-12-7    | Anthracene             | 0.029               | mg/L  |
| 21    | 129-00-0    | Pyrene                 | 0.23                | mg/L  |
| 21    | 1330-20-7   | Xylenes                | 7.6                 | mg/L  |
| 21    | 14797-55-8  | Nitrate                | 510                 | mg/L  |
| 21    | 14808-79-8  | Sulfate                | 5400                | mg/L  |
| 21    | 16887-00-6  | Chloride               | 380000              | mg/L  |
| 21    | 16984-48-8  | Fluoride               | 100                 | mg/L  |
| 21    | 17341-25-2  | Sodium ion             | 130000              | mg/L  |
| 21    | 179601-23-1 | m,p-Xylene             | 5.5                 | mg/L  |
| 21    | 18540-29-9  | Chromium (VI) ion      | 0.064               | mg/L  |
| 21    | 191-24-2    | Benzo(g,h,i)perylene   | 0.0015              | mg/L  |
| 21    | 193-39-5    | Indeno(1,2,3-cd)pyrene | 0.022               | mg/L  |
| 21    | 205-99-2    | Benzo(b)fluoranthene   | 0.006               | mg/L  |
| 21    | 206-44-0    | Fluoranthene           | 0.035               | mg/L  |
| 21    | 207-08-9    | Benzo(k)fluoranthene   | 0.0049              | mg/L  |
| 21    | 208-96-8    | Acenaphthylene         | 0.11                | mg/L  |
| 21    | 218-01-9    | Chrysene               | 0.11                | mg/L  |
| 21    | 24959-67-9  | Bromide                | 360                 | mg/L  |
| 21    | 50-32-8     | Benzo(a)pyrene         | 0.035               | mg/L  |
| 21    | 53-70-3     | Dibenz(a,h)anthracene  | 0.023               | mg/L  |
| 21    | 56-55-3     | Benz(a)anthracene      | 0.017               | mg/L  |
| 21    | 71-43-2     | Benzene                | 7.7                 | mg/L  |
| 21    | 7439-92-1   | Lead                   | 5.8                 | mg/L  |
| 21    | 7439-93-2   | Lithium                | 590                 | mg/L  |
| 21    | 7439-95-4   | Magnesium              | 9500                | mg/L  |
| 21    | 7439-97-6   | Mercury                | 0.011               | mg/L  |
| 21    | 7439-98-7   | Molybdenum             | 11                  | mg/L  |
| 21    | 7440-02-0   | Nickel                 | 1.5                 | mg/L  |
| 21    | 7440-22-4   | Silver                 | 2                   | mg/L  |
| 21    | 7440-24-6   | Strontium              | 3400                | mg/L  |
| 21    | 7440-28-0   | Thallium               | 10                  | mg/L  |
| 21    | 7440-36-0   | Antimony               | 12                  | mg/L  |
| 21    | 7440-38-2   | Arsenic                | 15                  | mg/L  |
| 21    | 7440-39-3   | Barium                 | 160000              | mg/L  |
| 21    | 7440-41-7   | Beryllium              | 0.29                | mg/L  |
| 21    | 7440-42-8   | Boron                  | 420                 | mg/L  |
| 21    | 7440-43-9   | Cadmium                | 0.6                 | mg/L  |
| 21    | 7440-47-3   | Chromium               | 0.16                | mg/L  |
| 21    | 7440-48-4   | Cobalt                 | 1.2                 | mg/L  |
| 21    | 7440-50-8   | Copper                 | 7.9                 | mg/L  |
| 21    | 7440-61-1   | Uranium                | 95                  | pCi/L |
| 21    | 7440-62-2   | Vanadium               | 0.73                | mg/L  |
| 21    | 7440-66-6   | Zinc                   | 9.4                 | mg/L  |
| 21    | 7440-70-2   | Calcium                | 180000              | mg/L  |
| 21    | 74-82-8     | Methane                | 15                  | mg/L  |
| 21    | 7782-49-2   | Selenium               | 17                  | mg/L  |
| 21    | 83-32-9     | Acenaphthene           | 0.28                | mg/L  |
| 21    | 85-01-8     | Phenanthrene           | 1.2                 | mg/L  |
| 21    | 86-73-7     | Fluorene               | 0.51                | mg/L  |
| 21    | 91-20-3     | Naphthalene            | 2.3                 | mg/L  |
| 21    | 95-47-6     | o-Xylene               | 2.1                 | mg/L  |
| 22    | 14265-44-2  | Phosphate              | 1.1                 | mg/L  |
| 22    | 14808-79-8  | Sulfate                | 67                  | mg/L  |

SI Table 4a: 1198 chemicals reported as being detected in produced water, by reference

| Refid | CAS        | Name                             | Conc (Max reported) | Units |
|-------|------------|----------------------------------|---------------------|-------|
| 22    | 16887-00-6 | Chloride                         | 20406               | mg/L  |
| 22    | 7439-89-6  | Iron                             | 0.3                 | mg/L  |
| 22    | 7439-95-4  | Magnesium                        | 459                 | mg/L  |
| 22    | 7440-23-5  | Sodium                           | 8997                | mg/L  |
| 22    | 7440-39-3  | Barium                           | 8.5                 | mg/L  |
| 22    | 7440-42-8  | Boron                            | 132                 | mg/L  |
| 22    | 7440-70-2  | Calcium                          | 1095                | mg/L  |
| 22    | 7631-86-9  | Silica                           | 181                 | mg/L  |
| 22    | 7664-41-7  | Ammonia                          | 0.4                 | mg/L  |
| 23    | 7440-09-7  | Potassium                        | 516                 | mg/L  |
| 23    | 108-88-3   | Toluene                          |                     |       |
| 23    | 1120-21-4  | Undecane                         |                     |       |
| 23    | 112-40-3   | Dodecane                         |                     |       |
| 23    | 119-64-2   | Tetralin                         |                     |       |
| 23    | 1321-94-4  | Methylnaphthalene                |                     |       |
| 23    | 1330-20-7  | Xylenes                          |                     |       |
| 23    | 14127-61-8 | Calcium ion                      | 8340                | mg/L  |
| 23    | 15438-31-0 | Fe +2 ion                        | 126                 | mg/L  |
| 23    | 16887-00-6 | Chloride                         | 95100               | mg/L  |
| 23    | 17341-25-2 | Sodium ion                       | 30500               | mg/L  |
| 23    | 24959-67-9 | Bromide                          | 939                 | mg/L  |
| 23    | 25551-13-7 | Trimethylbenzene                 |                     |       |
| 23    | 64-19-7    | Acetic acid                      |                     |       |
| 23    | 71-43-2    | Benzene                          |                     |       |
| 23    | 7439-95-4  | Magnesium                        | 1188                | mg/L  |
| 23    | 7440-39-3  | Barium                           | 3386                | mg/L  |
| 23    | 7704-34-9  | Sulfur                           | 11.7                | mg/L  |
| 23    | 7723-14-0  | Phosphorus                       | 8.8                 | mg/L  |
| 23    | 91-20-3    | Naphthalene                      |                     |       |
| 24    | 7440-09-7  | Potassium                        | 970                 | mg/L  |
| 24    | 7783-06-4  | Hydrogen sulfide                 | 190                 | mg/L  |
| 24    | 100-41-4   | Ethylbenzene                     | 0.024               | mg/L  |
| 24    | 108-88-3   | Toluene                          | 0.078               | mg/L  |
| 24    | 12587-46-1 | Alpha particle                   | 46.1                | pCi/L |
| 24    | 12587-47-2 | Beta particle                    | 122                 | pCi/L |
| 24    | 1330-20-7  | Xylenes                          | 0.327               | mg/L  |
| 24    | 14265-44-2 | Phosphate                        | 9.42                | mg/L  |
| 24    | 14808-79-8 | Sulfate                          | 1800                | mg/L  |
| 24    | 14859-67-7 | Radon 222                        | 139                 | pCi/L |
| 24    | 16887-00-6 | Chloride                         | 20100               | mg/L  |
| 24    | 16984-48-8 | Fluoride                         | 20                  | mg/L  |
| 24    | 24959-67-9 | Bromide                          | 69.6                | mg/L  |
| 24    | 3812-32-6  | Carbonate                        | 1178                | mg/L  |
| 24    | 471-34-1   | Carbonic acid calcium salt (1:1) | 11400               | mg/L  |
| 24    | 57-12-5    | Cyanide                          | 3                   | mg/L  |
| 24    | 71-43-2    | Benzene                          | 0.5                 | mg/L  |
| 24    | 71-52-3    | Bicarbonate                      | 13900               | mg/L  |
| 24    | 7429-90-5  | Aluminum                         | 2.9                 | mg/L  |
| 24    | 7439-89-6  | Iron                             | 258                 | mg/L  |
| 24    | 7439-92-1  | Lead                             | 0.39                | mg/L  |
| 24    | 7439-93-2  | Lithium                          | 4.73                | mg/L  |
| 24    | 7439-95-4  | Magnesium                        | 511                 | mg/L  |
| 24    | 7439-96-5  | Manganese                        | 2                   | mg/L  |
| 24    | 7439-98-7  | Molybdenum                       | 0.049               | mg/L  |
| 24    | 7440-02-0  | Nickel                           | 2.61                | mg/L  |
| 24    | 7440-22-4  | Silver                           | 0.14                | mg/L  |
| 24    | 7440-23-5  | Sodium                           | 7834                | mg/L  |
| 24    | 7440-24-6  | Strontium                        | 47.9                | mg/L  |
| 24    | 7440-31-5  | Tin                              | 0.039               | mg/L  |
| 24    | 7440-32-6  | Titanium                         | 0.02                | mg/L  |
| 24    | 7440-38-2  | Arsenic                          | 0.3                 | mg/L  |
| 24    | 7440-39-3  | Barium                           | 74                  | mg/L  |
| 24    | 7440-42-8  | Boron                            | 4.7                 | mg/L  |
| 24    | 7440-43-9  | Cadmium                          | 0.006               | mg/L  |
| 24    | 7440-47-3  | Chromium                         | 3.71                | mg/L  |
| 24    | 7440-48-4  | Cobalt                           | 0.018               | mg/L  |
| 24    | 7440-50-8  | Copper                           | 4.6                 | mg/L  |
| 24    | 7440-61-1  | Uranium                          | 2.5                 | mg/L  |
| 24    | 7440-62-2  | Vanadium                         | 0.013               | mg/L  |
| 24    | 7440-66-6  | Zinc                             | 3.9                 | mg/L  |
| 24    | 7440-70-2  | Calcium                          | 5530                | mg/L  |
| 24    | 7631-86-9  | Silica                           | 37.75               | mg/L  |

SI Table 4a: 1198 chemicals reported as being detected in produced water, by reference

| Refid | CAS         | Name                   | Conc (Max reported) | Units |
|-------|-------------|------------------------|---------------------|-------|
| 24    | 7727-37-9   | Nitrogen               | 26.1                | mg/L  |
| 24    | 7782-49-2   | Selenium               | 0.119               | mg/L  |
| 25    | 7429-90-5   | Aluminum               | 0.11                | mg/L  |
| 25    | 7439-89-6   | Iron                   | 8.3                 | mg/L  |
| 25    | 7439-95-4   | Magnesium              | 16.2                | mg/L  |
| 25    | 7439-96-5   | Manganese              | 0.14                | mg/L  |
| 25    | 7440-02-0   | Nickel                 | 0.015               | mg/L  |
| 25    | 7440-24-6   | Strontium              | 6.5                 | mg/L  |
| 25    | 7440-39-3   | Barium                 | 12.6                | mg/L  |
| 25    | 7440-50-8   | Copper                 | 0.06                | mg/L  |
| 25    | 7440-66-6   | Zinc                   | 0.1                 | mg/L  |
| 25    | 7440-70-2   | Calcium                | 40                  | mg/L  |
| 26    | 7440-09-7   | Potassium              | 6000                | mg/L  |
| 26    | 100-41-4    | Ethylbenzene           | 4410                | mg/L  |
| 26    | 103-65-1    | Propylbenzene          | 1290                | mg/L  |
| 26    | 104-51-8    | Butylbenzene           | 162                 | mg/L  |
| 26    | 105-67-9    | 2,4-Dimethylphenol     | 5                   | mg/L  |
| 26    | 108-67-8    | 1,3,5-Trimethylbenzene | 6250                | mg/L  |
| 26    | 108-88-3    | Toluene                | 16800               | mg/L  |
| 26    | 108-95-2    | Phenol                 | 6.96                | mg/L  |
| 26    | 112-27-6    | Triethylene glycol     | 17.8                | mg/L  |
| 26    | 1319-77-3   | Cresol                 | 6.76                | mg/L  |
| 26    | 135-98-8    | sec-Butylbenzene       | 270                 | mg/L  |
| 26    | 14127-61-8  | Calcium ion            | 1771                | mg/L  |
| 26    | 14808-79-8  | Sulfate                | 2100                | mg/L  |
| 26    | 15438-31-0  | Fe +2 ion              | 190.6               | mg/L  |
| 26    | 16887-00-6  | Chloride               | 5945                | mg/L  |
| 26    | 179601-23-1 | m,p-Xylene             | 46000               | mg/L  |
| 26    | 281-23-2    | Adamantane             | 74                  | mg/L  |
| 26    | 3812-32-6   | Carbonate              | 17000               | mg/L  |
| 26    | 702-79-4    | 1,3-Dimethyladamantane | 9.8                 | mg/L  |
| 26    | 71-43-2     | Benzene                | 860                 | mg/L  |
| 26    | 71-52-3     | Bicarbonate            | 4301                | mg/L  |
| 26    | 7439-95-4   | Magnesium              | 131                 | mg/L  |
| 26    | 7440-23-5   | Sodium                 | 2700                | mg/L  |
| 26    | 75-09-2     | Dichloromethane        | 0.51                | mg/L  |
| 26    | 91-20-3     | Naphthalene            | 37.8                | mg/L  |
| 26    | 91-57-6     | 2-Methylnaphthalene    | 110                 | mg/L  |
| 26    | 95-47-6     | o-Xylene               | 9430                | mg/L  |
| 26    | 95-48-7     | o-Cresol               | 7.76                | mg/L  |
| 26    | 95-63-6     | 1,2,4-Trimethylbenzene | 8730                | mg/L  |
| 26    | 98-06-6     | tert-Butylbenzene      | 86                  | mg/L  |
| 26    | 98-82-8     | Cumene                 | 948                 | mg/L  |
| 26    | 99-87-6     | p-Cymene               | 334                 | mg/L  |
| 27    | 13982-63-3  | Radium-226             |                     |       |
| 28    | 7440-09-7   | Potassium              | 1410                | mg/L  |
| 28    | 14808-79-8  | Sulfate                | 1790                | mg/L  |
| 28    | 15438-31-0  | Fe +2 ion              | 206.7790968         | mg/L  |
| 28    | 16887-00-6  | Chloride               | 97600               | mg/L  |
| 28    | 17341-25-2  | Sodium ion             | 54600               | mg/L  |
| 28    | 18496-25-8  | Sulfide                | 33.9                | mg/L  |
| 28    | 24959-67-9  | Bromide                | 1220                | mg/L  |
| 28    | 7439-95-4   | Magnesium              | 1310                | mg/L  |
| 28    | 7439-96-5   | Manganese              | 8.549077085         | mg/L  |
| 28    | 7440-21-3   | Silicon                | 30.53462607         | mg/L  |
| 28    | 7440-24-6   | Strontium              | 1900                | mg/L  |
| 28    | 7440-39-3   | Barium                 | 411.1584049         | mg/L  |
| 28    | 7440-42-8   | Boron                  | 50.3                | mg/L  |
| 28    | 7440-70-2   | Calcium                | 8010                | mg/L  |
| 28    | 7553-56-2   | Iodine                 | 385                 | mg/L  |
| 28    | 7664-41-7   | Ammonia                | 1970                | mg/L  |
| 29    | 16887-00-6  | Chloride               | 22209               | mg/L  |
| 29    | 7429-90-5   | Aluminum               | 1.6                 | mg/L  |
| 29    | 7439-89-6   | Iron                   | 189                 | mg/L  |
| 29    | 7439-95-4   | Magnesium              | 54.8                | mg/L  |
| 29    | 7440-24-6   | Strontium              | 52.7                | mg/L  |
| 29    | 7440-39-3   | Barium                 | 30.6                | mg/L  |
| 29    | 7440-42-8   | Boron                  | 23.5                | mg/L  |
| 29    | 7440-70-2   | Calcium                | 397                 | mg/L  |
| 30    | 7440-09-7   | Potassium              | 51.6                | mg/L  |
| 30    | 14808-79-8  | Sulfate                | 4.2                 | mg/L  |
| 30    | 16887-00-6  | Chloride               | 15550               | mg/L  |

SI Table 4a: 1198 chemicals reported as being detected in produced water, by reference

| Refid | CAS        | Name                                                                                                 | Conc (Max reported) | Units |
|-------|------------|------------------------------------------------------------------------------------------------------|---------------------|-------|
| 30    | 17341-25-2 | Sodium ion                                                                                           | 9372                | mg/L  |
| 30    | 24959-67-9 | Bromide                                                                                              | 68                  | mg/L  |
| 30    | 71-52-3    | Bicarbonate                                                                                          | 840                 | mg/L  |
| 30    | 7429-90-5  | Aluminum                                                                                             | 1.3                 | mg/L  |
| 30    | 7439-89-6  | Iron                                                                                                 | 65.4                | mg/L  |
| 30    | 7439-95-4  | Magnesium                                                                                            | 68.2                | mg/L  |
| 30    | 7439-96-5  | Manganese                                                                                            | 0.8                 | mg/L  |
| 30    | 7440-21-3  | Silicon                                                                                              | 63.5                | mg/L  |
| 30    | 7440-24-6  | Strontium                                                                                            | 53.1                | mg/L  |
| 30    | 7440-41-7  | Beryllium                                                                                            | 18.2                | mg/L  |
| 30    | 7440-42-8  | Boron                                                                                                | 18.5                | mg/L  |
| 30    | 7440-50-8  | Copper                                                                                               | 0.1                 | mg/L  |
| 30    | 7440-70-2  | Calcium                                                                                              | 453                 | mg/L  |
| 30    | 7664-41-7  | Ammonia                                                                                              | 40                  | mg/L  |
| 31    | 7440-09-7  | Potassium                                                                                            | 37.1                | mg/L  |
| 31    | 16887-00-6 | Chloride                                                                                             | 7082                | mg/L  |
| 31    | 16984-48-8 | Fluoride                                                                                             | 15.22               | mg/L  |
| 31    | 24959-67-9 | Bromide                                                                                              | 55                  | mg/L  |
| 31    | 3812-32-6  | Carbonate                                                                                            | 217.7               | mg/L  |
| 31    | 71-52-3    | Bicarbonate                                                                                          | 6417                | mg/L  |
| 31    | 7439-89-6  | Iron                                                                                                 | 10                  | mg/L  |
| 31    | 7439-93-2  | Lithium                                                                                              | 1.18                | mg/L  |
| 31    | 7439-95-4  | Magnesium                                                                                            | 45.6                | mg/L  |
| 31    | 7439-96-5  | Manganese                                                                                            | 0.33                | mg/L  |
| 31    | 7440-23-5  | Sodium                                                                                               | 4160                | mg/L  |
| 31    | 7440-39-3  | Barium                                                                                               | 15.1                | mg/L  |
| 31    | 7440-50-8  | Copper                                                                                               | 0.059               | mg/L  |
| 31    | 7440-70-2  | Calcium                                                                                              | 163.6               | mg/L  |
| 32    | 111-30-8   | Glutaraldehyde                                                                                       |                     |       |
| 32    | 63449-41-2 | Benzyl-C8-18-alkyldimethylammonium chlorides                                                         |                     |       |
| 32    | 68139-30-0 | 1-Propanaminium, N-(3-aminopropyl)-2-hydroxy-N,N-dimethyl-3-sulfo-, N-coco acyl derivs., inner salts |                     |       |
| 32    | 68140-01-2 | N-[3-(Dimethylamino)propyl] coco amides                                                              |                     |       |
| 32    | 9000-30-0  | Guar gum                                                                                             |                     |       |
| 33    | 7440-42-8  | Boron                                                                                                | 310                 | mg/L  |
| 34    | 7440-09-7  | Potassium                                                                                            | 140                 | mg/L  |
| 34    | 100-41-4   | Ethylbenzene                                                                                         | 0.0089              | mg/L  |
| 34    | 105-67-9   | 2,4-Dimethylphenol                                                                                   | 0.0066              | mg/L  |
| 34    | 106-44-5   | p-Cresol                                                                                             | 0.031               | mg/L  |
| 34    | 108-88-3   | Toluene                                                                                              | 0.11                | mg/L  |
| 34    | 108-95-2   | Phenol                                                                                               | 0.009               | mg/L  |
| 34    | 129-00-0   | Pyrene                                                                                               | 0.0019              | mg/L  |
| 34    | 132-64-9   | Dibenzofuran                                                                                         | 0.0036              | mg/L  |
| 34    | 1330-20-7  | Xylenes                                                                                              | 0.13                | mg/L  |
| 34    | 14808-79-8 | Sulfate                                                                                              | 2500                | mg/L  |
| 34    | 16887-00-6 | Chloride                                                                                             | 1500                | mg/L  |
| 34    | 16984-48-8 | Fluoride                                                                                             | 4.4                 | mg/L  |
| 34    | 208-96-8   | Acenaphthylene                                                                                       | 0.0021              | mg/L  |
| 34    | 471-34-1   | Carbonic acid calcium salt (1:1)                                                                     | 3540                | mg/L  |
| 34    | 67-64-1    | Acetone                                                                                              | 0.62                | mg/L  |
| 34    | 71-43-2    | Benzene                                                                                              | 0.04                | mg/L  |
| 34    | 7439-95-4  | Magnesium                                                                                            | 54                  | mg/L  |
| 34    | 7440-23-5  | Sodium                                                                                               | 970                 | mg/L  |
| 34    | 7440-70-2  | Calcium                                                                                              | 370                 | mg/L  |
| 34    | 7727-37-9  | Nitrogen                                                                                             | 0.06                | mg/L  |
| 34    | 78-93-3    | Methyl ethyl ketone                                                                                  | 0.0015              | mg/L  |
| 34    | 83-32-9    | Acenaphthene                                                                                         | 0.0033              | mg/L  |
| 34    | 85-01-8    | Phenanthrene                                                                                         | 0.01                | mg/L  |
| 34    | 86-73-7    | Fluorene                                                                                             | 0.002               | mg/L  |
| 34    | 91-20-3    | Naphthalene                                                                                          | 0.021               | mg/L  |
| 34    | 91-57-6    | 2-Methylnaphthalene                                                                                  | 0.1                 | mg/L  |
| 34    | 95-48-7    | o-Cresol                                                                                             | 0.0078              | mg/L  |
| 35    | 10023-74-2 | Pentanoic acid, ion(1-)                                                                              | 1.51689             | mg/L  |
| 35    | 103-40-2   | Benzylsuccinate                                                                                      | 0.006871029         | mg/L  |
| 35    | 106-65-0   | Dimethyl succinate                                                                                   | 0.8914662           | mg/L  |
| 35    | 108-95-2   | Phenol                                                                                               | 0.7999605           | mg/L  |
| 35    | 110-94-1   | Glutaric acid                                                                                        | 0.290653            | mg/L  |
| 35    | 111-14-8   | Heptanoic acid                                                                                       | 0.3124488           | mg/L  |
| 35    | 111-16-0   | Heptanedioic acid                                                                                    | 0.1441521           | mg/L  |
| 35    | 1131-63-1  | 5,6,7,8-Tetrahydro-2-naphthoic acid                                                                  | 0.002995655         | mg/L  |
| 35    | 118-90-1   | 2-Methylbenzoic acid                                                                                 | 0.21784             | mg/L  |
| 35    | 121-91-5   | 1,3-Benzenedicarboxylic acid                                                                         | 0.3821036           | mg/L  |
| 35    | 123-25-1   | Diethyl butanedioate                                                                                 | 1.4109876           | mg/L  |

SI Table 4a: 1198 chemicals reported as being detected in produced water, by reference

| Refid | CAS        | Name                              | Conc (Max reported) | Units |
|-------|------------|-----------------------------------|---------------------|-------|
| 35    | 124-07-2   | Octanoic acid                     | 0.08220198          | mg/L  |
| 35    | 142-62-1   | Hexanoic acid                     | 0.766656            | mg/L  |
| 35    | 533-18-6   | Acetic acid, 2-methylphenyl ester | 0.05556549          | mg/L  |
| 35    | 766-76-7   | Benzoate                          | 0.3512364           | mg/L  |
| 35    | 86-55-5    | 1-Naphthalenecarboxylic acid      | 0.003615843         | mg/L  |
| 35    | 93-09-4    | 2-Naphthalenecarboxylic acid      | 0.02582745          | mg/L  |
| 35    | 95-48-7    | o-Cresol                          | 0.248722            | mg/L  |
| 35    | 99-06-9    | 3-Hydroxybenzoic acid             | 0.03038684          | mg/L  |
| 36    | 7440-09-7  | Potassium                         |                     |       |
| 36    | 7439-89-6  | Iron                              |                     |       |
| 36    | 7439-95-4  | Magnesium                         |                     |       |
| 36    | 7440-23-5  | Sodium                            |                     |       |
| 36    | 7440-24-6  | Strontium                         |                     |       |
| 36    | 7440-39-3  | Barium                            |                     |       |
| 36    | 7440-70-2  | Calcium                           |                     |       |
| 37    | 14798-03-9 | Ammonium                          |                     |       |
| 37    | 16887-00-6 | Chloride                          |                     |       |
| 37    | 24959-67-9 | Bromide                           |                     |       |
| 37    | 7553-56-2  | Iodine                            |                     |       |
| 38    | 7440-09-7  | Potassium                         |                     |       |
| 38    | 100-41-4   | Ethylbenzene                      |                     |       |
| 38    | 100-51-6   | Benzyl alcohol                    |                     |       |
| 38    | 1024-57-3  | Heptachlor epoxide                |                     |       |
| 38    | 103-65-1   | Propylbenzene                     |                     |       |
| 38    | 104-51-8   | Butylbenzene                      |                     |       |
| 38    | 105-67-9   | 2,4-Dimethylphenol                |                     |       |
| 38    | 10595-95-6 | N-Nitroso-N-methylethylamine      |                     |       |
| 38    | 106-44-5   | p-Cresol                          |                     |       |
| 38    | 107-02-8   | Acrolein                          |                     |       |
| 38    | 107-13-1   | Acrylonitrile                     |                     |       |
| 38    | 107-21-1   | Ethylene glycol                   |                     |       |
| 38    | 107-92-6   | Butanoic acid                     |                     |       |
| 38    | 108-39-4   | m-Cresol                          |                     |       |
| 38    | 108-67-8   | 1,3,5-Trimethylbenzene            |                     |       |
| 38    | 108-88-3   | Toluene                           |                     |       |
| 38    | 108-95-2   | Phenol                            |                     |       |
| 38    | 109-06-8   | 2-Methylpyridine                  |                     |       |
| 38    | 110-86-1   | Pyridine                          |                     |       |
| 38    | 111-44-4   | Bis(2-chloroethyl) ether          |                     |       |
| 38    | 117-81-7   | Di(2-ethylhexyl) phthalate        |                     |       |
| 38    | 117-84-0   | Di-n-octyl phthalate              |                     |       |
| 38    | 120-82-1   | 1,2,4-Trichlorobenzene            |                     |       |
| 38    | 122-39-4   | Diphenylamine                     |                     |       |
| 38    | 123-91-1   | 1,4-Dioxane                       |                     |       |
| 38    | 124-38-9   | Carbon dioxide                    |                     |       |
| 38    | 12672-29-6 | Aroclor 1248                      |                     |       |
| 38    | 127-18-4   | Tetrachloroethylene               |                     |       |
| 38    | 129-00-0   | Pyrene                            |                     |       |
| 38    | 1330-20-7  | Xylenes                           |                     |       |
| 38    | 135-98-8   | sec-Butylbenzene                  |                     |       |
| 38    | 14797-55-8 | Nitrate                           |                     |       |
| 38    | 14797-65-0 | Nitrite                           |                     |       |
| 38    | 14808-79-8 | Sulfate                           |                     |       |
| 38    | 16887-00-6 | Chloride                          |                     |       |
| 38    | 16984-48-8 | Fluoride                          |                     |       |
| 38    | 18496-25-8 | Sulfide                           |                     |       |
| 38    | 191-24-2   | Benzo(g,h,i)perylene              |                     |       |
| 38    | 193-39-5   | Indeno(1,2,3-cd)pyrene            |                     |       |
| 38    | 205-99-2   | Benzo(b)fluoranthene              |                     |       |
| 38    | 206-44-0   | Fluoranthene                      |                     |       |
| 38    | 207-08-9   | Benzo(k)fluoranthene              |                     |       |
| 38    | 24959-67-9 | Bromide                           |                     |       |
| 38    | 298-02-2   | Phorate                           |                     |       |
| 38    | 309-00-2   | Aldrin                            |                     |       |
| 38    | 319-85-7   | beta-Hexachlorocyclohexane        |                     |       |
| 38    | 319-86-8   | delta-Hexachlorocyclohexane       |                     |       |
| 38    | 33213-65-9 | Endosulfan II                     |                     |       |
| 38    | 50-32-8    | Benzo(a)pyrene                    |                     |       |
| 38    | 53-70-3    | Dibenz(a,h)anthracene             |                     |       |
| 38    | 57-12-5    | Cyanide                           |                     |       |
| 38    | 57-55-6    | 1,2-Propylene glycol              |                     |       |
| 38    | 57-97-6    | 7,12-Dimethylbenz(a)anthracene    |                     |       |



SI Table 4a: 1198 chemicals reported as being detected in produced water, by reference

| Refid | CAS        | Name                         | Conc (Max reported) | Units |
|-------|------------|------------------------------|---------------------|-------|
| 38    | 58-89-9    | Lindane                      |                     |       |
| 38    | 60-57-1    | Dieldrin                     |                     |       |
| 38    | 64-19-7    | Acetic acid                  |                     |       |
| 38    | 67-56-1    | Methanol                     |                     |       |
| 38    | 67-63-0    | Isopropanol                  |                     |       |
| 38    | 67-64-1    | Acetone                      |                     |       |
| 38    | 67-66-3    | Chloroform                   |                     |       |
| 38    | 71-43-2    | Benzene                      |                     |       |
| 38    | 72-55-9    | p,p'-DDE                     |                     |       |
| 38    | 7421-93-4  | Endrin aldehyde              |                     |       |
| 38    | 7429-90-5  | Aluminum                     |                     |       |
| 38    | 7439-89-6  | Iron                         |                     |       |
| 38    | 7439-92-1  | Lead                         |                     |       |
| 38    | 7439-93-2  | Lithium                      |                     |       |
| 38    | 7439-95-4  | Magnesium                    |                     |       |
| 38    | 7439-96-5  | Manganese                    |                     |       |
| 38    | 7439-97-6  | Mercury                      |                     |       |
| 38    | 7439-98-7  | Molybdenum                   |                     |       |
| 38    | 7440-02-0  | Nickel                       |                     |       |
| 38    | 7440-22-4  | Silver                       |                     |       |
| 38    | 7440-23-5  | Sodium                       |                     |       |
| 38    | 7440-24-6  | Strontium                    |                     |       |
| 38    | 7440-28-0  | Thallium                     |                     |       |
| 38    | 7440-31-5  | Tin                          |                     |       |
| 38    | 7440-32-6  | Titanium                     |                     |       |
| 38    | 7440-36-0  | Antimony                     |                     |       |
| 38    | 7440-38-2  | Arsenic                      |                     |       |
| 38    | 7440-39-3  | Barium                       |                     |       |
| 38    | 7440-41-7  | Beryllium                    |                     |       |
| 38    | 7440-42-8  | Boron                        |                     |       |
| 38    | 7440-43-9  | Cadmium                      |                     |       |
| 38    | 7440-47-3  | Chromium                     |                     |       |
| 38    | 7440-48-4  | Cobalt                       |                     |       |
| 38    | 7440-50-8  | Copper                       |                     |       |
| 38    | 7440-66-6  | Zinc                         |                     |       |
| 38    | 7440-67-7  | Zirconium                    |                     |       |
| 38    | 7440-70-2  | Calcium                      |                     |       |
| 38    | 74-83-9    | Methyl bromide               |                     |       |
| 38    | 75-09-2    | Dichloromethane              |                     |       |
| 38    | 75-15-0    | Carbon disulfide             |                     |       |
| 38    | 75-25-2    | Bromoform                    |                     |       |
| 38    | 7553-56-2  | Iodine                       |                     |       |
| 38    | 76-44-8    | Heptachlor                   |                     |       |
| 38    | 7664-41-7  | Ammonia                      |                     |       |
| 38    | 7723-14-0  | Phosphorus                   |                     |       |
| 38    | 7782-49-2  | Selenium                     |                     |       |
| 38    | 78-93-3    | Methyl ethyl ketone          |                     |       |
| 38    | 84-66-2    | Diethyl phthalate            |                     |       |
| 38    | 84-74-2    | Dibutyl phthalate            |                     |       |
| 38    | 85-01-8    | Phenanthrene                 |                     |       |
| 38    | 86-30-6    | N-Nitrosodiphenylamine       |                     |       |
| 38    | 86-73-7    | Fluorene                     |                     |       |
| 38    | 87-61-6    | 1,2,3-Trichlorobenzene       |                     |       |
| 38    | 87-65-0    | 2,6-Dichlorophenol           |                     |       |
| 38    | 91-20-3    | Naphthalene                  |                     |       |
| 38    | 91-57-6    | 2-Methylnaphthalene          |                     |       |
| 38    | 94-59-7    | Safrole                      |                     |       |
| 38    | 95-48-7    | o-Cresol                     |                     |       |
| 38    | 95-63-6    | 1,2,4-Trimethylbenzene       |                     |       |
| 38    | 959-98-8   | Endosulfan I                 |                     |       |
| 38    | 98-82-8    | Cumene                       |                     |       |
| 38    | 98-86-2    | Acetophenone                 |                     |       |
| 38    | 99-87-6    | p-Cymene                     |                     |       |
| 39    | 100-51-6   | Benzyl alcohol               |                     |       |
| 39    | 105-67-9   | 2,4-Dimethylphenol           |                     |       |
| 39    | 10595-95-6 | N-Nitroso-N-methylethylamine |                     |       |
| 39    | 106-44-5   | p-Cresol                     |                     |       |
| 39    | 108-39-4   | m-Cresol                     |                     |       |
| 39    | 108-67-8   | 1,3,5-Trimethylbenzene       |                     |       |
| 39    | 108-95-2   | Phenol                       |                     |       |
| 39    | 110-86-1   | Pyridine                     |                     |       |
| 39    | 120-83-2   | 2,4-Dichlorophenol           |                     |       |

SI Table 4a: 1198 chemicals reported as being detected in produced water, by reference

| Refid | CAS        | Name                                    | Conc (Max reported) | Units |
|-------|------------|-----------------------------------------|---------------------|-------|
| 39    | 122-39-4   | Diphenylamine                           |                     |       |
| 39    | 122-66-7   | 1,2-Diphenylhydrazine                   |                     |       |
| 39    | 123-91-1   | 1,4-Dioxane                             |                     |       |
| 39    | 129-00-0   | Pyrene                                  |                     |       |
| 39    | 191-24-2   | Benzo(g,h,i)perylene                    |                     |       |
| 39    | 193-39-5   | Indeno(1,2,3-cd)pyrene                  |                     |       |
| 39    | 205-99-2   | Benzo(b)fluoranthene                    |                     |       |
| 39    | 206-44-0   | Fluoranthene                            |                     |       |
| 39    | 207-08-9   | Benzo(k)fluoranthene                    |                     |       |
| 39    | 218-01-9   | Chrysene                                |                     |       |
| 39    | 50-32-8    | Benzo(a)pyrene                          |                     |       |
| 39    | 53-70-3    | Dibenz(a,h)anthracene                   |                     |       |
| 39    | 56-55-3    | Benz(a)anthracene                       |                     |       |
| 39    | 67-64-1    | Acetone                                 |                     |       |
| 39    | 85-01-8    | Phenanthrene                            |                     |       |
| 39    | 86-30-6    | N-Nitrosodiphenylamine                  |                     |       |
| 39    | 86-73-7    | Fluorene                                |                     |       |
| 39    | 91-20-3    | Naphthalene                             |                     |       |
| 39    | 91-57-6    | 2-Methylnaphthalene                     |                     |       |
| 39    | 92-87-5    | Benzidine                               |                     |       |
| 39    | 95-48-7    | o-Cresol                                |                     |       |
| 39    | 95-63-6    | 1,2,4-Trimethylbenzene                  |                     |       |
| 39    | 98-86-2    | Acetophenone                            |                     |       |
| 40    | 13982-63-3 | Radium-226                              | 15570               | pCi/L |
| 40    | 14127-61-8 | Calcium ion                             | 31270               | mg/L  |
| 40    | 15262-20-1 | Radium-228                              | 1385                | pCi/L |
| 40    | 15438-31-0 | Fe +2 ion                               | 28.2                | mg/L  |
| 40    | 16887-00-6 | Chloride                                | 152213              | mg/L  |
| 40    | 17341-25-2 | Sodium ion                              | 31382               | mg/L  |
| 40    | 7439-95-4  | Magnesium                               | 1590                | mg/L  |
| 40    | 7440-24-6  | Strontium                               | 16141               | mg/L  |
| 40    | 7440-39-3  | Barium                                  | 19115               | mg/L  |
| 41    | 7440-09-7  | Potassium                               | 2570                | mg/L  |
| 41    | 115-86-6   | Triphenyl phosphate                     |                     |       |
| 41    | 120-12-7   | Anthracene                              | 0.0000507           | mg/L  |
| 41    | 129-00-0   | Pyrene                                  | 0.0000373           | mg/L  |
| 41    | 132-65-0   | Dibenzothiophene                        | 0.0000237           | mg/L  |
| 41    | 14127-61-8 | Calcium ion                             | 11800               | mg/L  |
| 41    | 1576-67-6  | 3,6-Dimethylphenanthrene                | 0.000334            | mg/L  |
| 41    | 16887-00-6 | Chloride                                | 136000              | mg/L  |
| 41    | 1730-37-6  | 1-Methylfluorene                        | 0.000297            | mg/L  |
| 41    | 205-82-3   | Benzo(j)fluoranthene                    |                     |       |
| 41    | 205-99-2   | Benzo(b)fluoranthene                    | 0.0000103           | mg/L  |
| 41    | 206-44-0   | Fluoranthene                            | 0.00000961          | mg/L  |
| 41    | 207-08-9   | Benzo(k)fluoranthene                    |                     |       |
| 41    | 208-96-8   | Acenaphthylene                          | 0.0000137           | mg/L  |
| 41    | 218-01-9   | Chrysene                                | 0.0000502           | mg/L  |
| 41    | 2381-21-7  | 1-Methylpyrene                          | 0.0000477           | mg/L  |
| 41    | 25322-68-3 | Polyethylene glycol                     |                     |       |
| 41    | 483-65-8   | Retene                                  | 0.0000336           | mg/L  |
| 41    | 50-32-8    | Benzo(a)pyrene                          | 0.0000112           | mg/L  |
| 41    | 56-55-3    | Benz(a)anthracene                       | 0.0000159           | mg/L  |
| 41    | 7440-23-5  | Sodium                                  | 70000               | mg/L  |
| 41    | 7727-37-9  | Nitrogen                                | 498                 | mg/L  |
| 41    | 832-69-9   | 1-Methyl phenanthrene                   | 0.000234            | mg/L  |
| 41    | 83-32-9    | Acenaphthene                            | 0.000028            | mg/L  |
| 41    | 85-01-8    | Phenanthrene                            | 0.000145            | mg/L  |
| 41    | 86-73-7    | Fluorene                                | 0.000545            | mg/L  |
| 41    | 90-12-0    | 1-Methylnaphthalene                     | 0.000111            | mg/L  |
| 41    | 91-20-3    | Naphthalene                             | 0.0000563           | mg/L  |
| 41    | 95906-11-9 | tris(2,4-di-tert-butylphenyl) phosphate |                     |       |
| 42    | 120-12-7   | Anthracene                              |                     |       |
| 42    | 129-00-0   | Pyrene                                  |                     |       |
| 42    | 1576-67-6  | 3,6-Dimethylphenanthrene                |                     |       |
| 42    | 1730-37-6  | 1-Methylfluorene                        |                     |       |
| 42    | 191-24-2   | Benzo(g,h,i)perylene                    |                     |       |
| 42    | 205-99-2   | Benzo(b)fluoranthene                    |                     |       |
| 42    | 206-44-0   | Fluoranthene                            |                     |       |
| 42    | 218-01-9   | Chrysene                                |                     |       |
| 42    | 2381-21-7  | 1-Methylpyrene                          |                     |       |
| 42    | 53-70-3    | Dibenz(a,h)anthracene                   |                     |       |
| 42    | 56-55-3    | Benz(a)anthracene                       |                     |       |

SI Table 4a: 1198 chemicals reported as being detected in produced water, by reference

| Refid | CAS        | Name                                  | Conc (Max reported) | Units |
|-------|------------|---------------------------------------|---------------------|-------|
| 42    | 832-69-9   | 1-Methyl phenanthrene                 |                     |       |
| 42    | 85-01-8    | Phenanthrene                          |                     |       |
| 42    | 86-73-7    | Fluorene                              |                     |       |
| 43    | 7440-09-7  | Potassium                             | 48.14               | mg/L  |
| 43    | 14265-44-2 | Phosphate                             | 8.34                | mg/L  |
| 43    | 14808-79-8 | Sulfate                               | 2582                | mg/L  |
| 43    | 16887-00-6 | Chloride                              | 2139                | mg/L  |
| 43    | 16984-48-8 | Fluoride                              | 3.62                | mg/L  |
| 43    | 24959-67-9 | Bromide                               | 0.04                | mg/L  |
| 43    | 71-52-3    | Bicarbonate                           | 5368                | mg/L  |
| 43    | 7429-90-5  | Aluminum                              | 105                 | mg/L  |
| 43    | 7439-89-6  | Iron                                  | 162                 | mg/L  |
| 43    | 7439-92-1  | Lead                                  | 0.51                | mg/L  |
| 43    | 7439-93-2  | Lithium                               | 0.32                | mg/L  |
| 43    | 7439-95-4  | Magnesium                             | 54.92               | mg/L  |
| 43    | 7439-96-5  | Manganese                             | 2.69                | mg/L  |
| 43    | 7440-02-0  | Nickel                                | 0.56                | mg/L  |
| 43    | 7440-21-3  | Silicon                               | 51.38               | mg/L  |
| 43    | 7440-23-5  | Sodium                                | 2539                | mg/L  |
| 43    | 7440-24-6  | Strontium                             | 6.69                | mg/L  |
| 43    | 7440-39-3  | Barium                                | 375                 | mg/L  |
| 43    | 7440-42-8  | Boron                                 | 4.1                 | mg/L  |
| 43    | 7440-47-3  | Chromium                              | 3.16                | mg/L  |
| 43    | 7440-50-8  | Copper                                | 0.91                | mg/L  |
| 43    | 7440-62-2  | Vanadium                              | 0.34                | mg/L  |
| 43    | 7440-66-6  | Zinc                                  | 1.3                 | mg/L  |
| 43    | 7440-70-2  | Calcium                               | 544                 | mg/L  |
| 44    | 2883-02-5  | Cyclohexane, nonyl-                   |                     |       |
| 44    | 4810-04-2  | 1,3,5-Trimethyl-2-propylbenzene       |                     |       |
| 44    | 5161-04-6  | Benzene, 1-methyl-4-(2-methylpropyl)- |                     |       |
| 44    | 5911-04-6  | 3-Methylnonane                        |                     |       |
| 44    | 1002-43-3  | Undecane, 3-methyl-                   |                     |       |
| 44    | 100-41-4   | Ethylbenzene                          |                     |       |
| 44    | 100-51-6   | Benzyl alcohol                        |                     |       |
| 44    | 100-52-7   | Benzaldehyde                          |                     |       |
| 44    | 1008-80-6  | 2,3-Dimethyldecahydronaphthalene      |                     |       |
| 44    | 101-81-5   | Diphenylmethane                       |                     |       |
| 44    | 10222-95-4 | 5-Isopropyl-1,2,4-trimethylbenzene    |                     |       |
| 44    | 10317-17-6 | Oxetane, 3-(1-methylethyl)-           |                     |       |
| 44    | 103-65-1   | Propylbenzene                         |                     |       |
| 44    | 10374-74-0 | 7-Tetradecene                         |                     |       |
| 44    | 104-50-7   | 4-Octanolide                          |                     |       |
| 44    | 104-51-8   | Butylbenzene                          |                     |       |
| 44    | 104-61-0   | gamma-Nonanolactone                   |                     |       |
| 44    | 104-76-7   | 2-Ethyl-1-hexanol                     |                     |       |
| 44    | 105-21-5   | 1,4-Heptanolide                       |                     |       |
| 44    | 10522-26-6 | 2-Methyl-1-undecanol                  |                     |       |
| 44    | 10544-95-3 | Octadecane, 4-methyl-                 |                     |       |
| 44    | 106-21-8   | 3,7-Dimethyloctan-1-ol                |                     |       |
| 44    | 106-35-4   | 3-Heptanone                           |                     |       |
| 44    | 106-42-3   | p-Xylene                              |                     |       |
| 44    | 106-44-5   | p-Cresol                              |                     |       |
| 44    | 1075-06-5  | Ethanone, 2,2-dihydroxy-1-phenyl-     |                     |       |
| 44    | 1077-16-3  | Benzene, hexyl-                       |                     |       |
| 44    | 107-92-6   | Butanoic acid                         |                     |       |
| 44    | 1079-71-6  | 1,2,3,4,5,6,7,8-Octahydroanthracene   |                     |       |
| 44    | 1081-77-2  | 1-Phenylnonane                        |                     |       |
| 44    | 108-29-2   | 4-Pentanolide                         |                     |       |
| 44    | 108-88-3   | Toluene                               |                     |       |
| 44    | 108-94-1   | Cyclohexanone                         |                     |       |
| 44    | 108-95-2   | Phenol                                |                     |       |
| 44    | 109-52-4   | Pentanoic acid                        |                     |       |
| 44    | 111-14-8   | Heptanoic acid                        |                     |       |
| 44    | 111-27-3   | 1-Hexanol                             |                     |       |
| 44    | 111-65-9   | Octane                                |                     |       |
| 44    | 111-76-2   | 2-Butoxyethanol                       |                     |       |
| 44    | 111-84-2   | Nonane                                |                     |       |
| 44    | 1120-21-4  | Undecane                              |                     |       |
| 44    | 112-05-0   | Nonanoic acid                         |                     |       |
| 44    | 112-30-1   | 1-Decanol                             |                     |       |
| 44    | 112-31-2   | Decanal                               |                     |       |
| 44    | 112-37-8   | Undecanoic acid                       |                     |       |

SI Table 4a: 1198 chemicals reported as being detected in produced water, by reference

| Refid | CAS         | Name                                       | Conc (Max reported) | Units |
|-------|-------------|--------------------------------------------|---------------------|-------|
| 44    | 112-40-3    | Dodecane                                   |                     |       |
| 44    | 1124-63-6   | 3-Cyclohexylpropan-1-ol                    |                     |       |
| 44    | 112-70-9    | 1-Tridecanol                               |                     |       |
| 44    | 1129-29-9   | 1-Isopropenyl-3-isopropylbenzene           |                     |       |
| 44    | 115-22-0    | 2-Butanone, 3-hydroxy-3-methyl-            |                     |       |
| 44    | 116-53-0    | 2-Methylbutanoic acid                      |                     |       |
| 44    | 119-64-2    | Tetralin                                   |                     |       |
| 44    | 123-05-7    | 2-Ethylhexanal                             |                     |       |
| 44    | 123-20-6    | Butanoic acid, ethenyl ester               |                     |       |
| 44    | 124-07-2    | Octanoic acid                              |                     |       |
| 44    | 124-10-7    | Methyl tetradecanoate                      |                     |       |
| 44    | 124-18-5    | Decane                                     |                     |       |
| 44    | 13151-94-5  | 1,2-Dimethylcyclooctane                    |                     |       |
| 44    | 13286-73-2  | 3-Ethyltridecane                           |                     |       |
| 44    | 13287-21-3  | 6-Methyltridecane                          |                     |       |
| 44    | 13287-23-5  | 8-Methylheptadecane                        |                     |       |
| 44    | 13432-25-2  | 3-hexanol, 2,4-dimethyl-                   |                     |       |
| 44    | 135-98-8    | sec-Butylbenzene                           |                     |       |
| 44    | 13632-94-5  | 1,4-Diethyl-2-methylbenzene                |                     |       |
| 44    | 13833-20-0  | Amorphane                                  |                     |       |
| 44    | 140-66-9    | 4-(1,1,3,3-Tetramethylbutyl)phenol         |                     |       |
| 44    | 14123-41-2  | 3-Chloro-1,1,2,2-tetramethylcyclopropane   |                     |       |
| 44    | 14250-88-5  | 2,2-Dimethylvaleraldehyde                  |                     |       |
| 44    | 142-62-1    | Hexanoic acid                              |                     |       |
| 44    | 14276-95-0  | 1H-Indene, 2,3-dihydro-1,1,6-trimethyl-    |                     |       |
| 44    | 143-07-7    | Dodecanoic acid                            |                     |       |
| 44    | 143-08-8    | 1-Nonanol                                  |                     |       |
| 44    | 14398-67-5  | Decalin, syn-1-methyl-, cis-               |                     |       |
| 44    | 14398-71-1  | cis-Decalin, 2-syn-methyl-                 |                     |       |
| 44    | 1468-39-9   | 2-Methylbutanoic anhydride                 |                     |       |
| 44    | 146919-79-1 | 5-Methyl-1-undecene                        |                     |       |
| 44    | 149-57-5    | 2-Ethylhexanoic acid                       |                     |       |
| 44    | 15232-85-6  | Cyclohexene, 1-pentyl-                     |                     |       |
| 44    | 15232-86-7  | 1-Heptylcyclohexene                        |                     |       |
| 44    | 1559-81-5   | 1-Methyltetraline                          |                     |       |
| 44    | 1560-88-9   | Octadecane, 2-methyl-                      |                     |       |
| 44    | 1560-89-0   | Heptadecane, 2-methyl-                     |                     |       |
| 44    | 1560-92-5   | 2-Methylhexadecane                         |                     |       |
| 44    | 1560-93-6   | 2-Methylpentadecane                        |                     |       |
| 44    | 1560-95-8   | 2-Methyltetradecane                        |                     |       |
| 44    | 1560-96-9   | 2-Methyltridecane                          |                     |       |
| 44    | 1560-97-0   | 2-Methyldodecane                           |                     |       |
| 44    | 1595-10-4   | 1-Methyl-2-n-hexylbenzene                  |                     |       |
| 44    | 1595-16-0   | 1-(Butan-2-yl)-4-methylbenzene             |                     |       |
| 44    | 1599-67-3   | 1-Docosene                                 |                     |       |
| 44    | 1606-08-2   | Cyclopentylcyclohexane                     |                     |       |
| 44    | 1618-22-0   | naphthalene, decahydro-2,6-dimethyl-       |                     |       |
| 44    | 1632-70-8   | Undecane, 5-methyl-                        |                     |       |
| 44    | 16538-89-9  | cyclooctane, (1-methylpropyl)-             |                     |       |
| 44    | 16580-24-8  | 1-Methyl-3-propan-2-ylcyclohexane          |                     |       |
| 44    | 16580-26-0  | cyclohexane, 1-isopropyl-1-methyl-         |                     |       |
| 44    | 1660-04-4   | Methyl tricyclo(3.3.1.13,7)dec-1-yl ketone |                     |       |
| 44    | 1678-93-9   | Butylcyclohexane                           |                     |       |
| 44    | 1687-34-9   | 1-Ethyl-3-methyladamantane                 |                     |       |
| 44    | 1687-64-5   | Phenol, 2-ethyl-6-methyl-                  |                     |       |
| 44    | 1703-51-1   | 2,5-Heptanedione                           |                     |       |
| 44    | 17059-48-2  | 1H-Indene, 2,3-dihydro-1,6-dimethyl-       |                     |       |
| 44    | 17301-23-4  | 2,6-Dimethylundecane                       |                     |       |
| 44    | 17301-26-7  | 2,9-Dimethylundecane                       |                     |       |
| 44    | 17302-28-2  | Nonane, 2,6-dimethyl-                      |                     |       |
| 44    | 17302-32-8  | 3,7-Dimethylnonane                         |                     |       |
| 44    | 17312-54-8  | 3,7-Dimethyldecane                         |                     |       |
| 44    | 17312-57-1  | 3-Methyldodecane                           |                     |       |
| 44    | 17312-81-1  | 3,5-Dimethylundecane                       |                     |       |
| 44    | 17429-36-6  | 2-Cyclohexen-1-one, 4-methyl-4-phenyl-     |                     |       |
| 44    | 17453-94-0  | Undecane, 5-ethyl-                         |                     |       |
| 44    | 1746-23-2   | 4-tert-Butylstyrene                        |                     |       |
| 44    | 1750-51-2   | Naphthalene, decahydro-1,6-dimethyl-       |                     |       |
| 44    | 1758-88-9   | 2-Ethyl-p-xylene                           |                     |       |
| 44    | 17720-63-7  | N,N,O-Triacetylhydroxylamine               |                     |       |
| 44    | 17851-53-5  | Butyl isobutyl phthalate                   |                     |       |
| 44    | 1795-15-9   | Cyclohexane, octyl-                        |                     |       |

SI Table 4a: 1198 chemicals reported as being detected in produced water, by reference

| Refid | CAS        | Name                                          | Conc (Max reported) | Units |
|-------|------------|-----------------------------------------------|---------------------|-------|
| 44    | 1795-16-0  | Decylcyclohexane                              |                     |       |
| 44    | 18420-41-2 | 2-(Chloromethyl)tetrahydropyran               |                     |       |
| 44    | 18435-22-8 | Tetradecane, 3-methyl-                        |                     |       |
| 44    | 18435-45-5 | 1-Nonadecene                                  |                     |       |
| 44    | 1871-67-6  | 2-Octenoic acid                               |                     |       |
| 44    | 1921-70-6  | Norphytane                                    |                     |       |
| 44    | 19218-94-1 | 1-Iodotetradecane                             |                     |       |
| 44    | 19219-84-2 | benzene, (1,3-dimethylbutyl)-                 |                     |       |
| 44    | 19781-34-1 | 3-ethyl-3-phenyl-1-pentene                    |                     |       |
| 44    | 1985-59-7  | 1,1-Dimethyl(1,2,3,4-tetrahydronaphthalene)   |                     |       |
| 44    | 1985-88-2  | 4-Chloro-2-methyl-2-butanol                   |                     |       |
| 44    | 1985-97-3  | (3-methylpentan-3-yl)benzene                  |                     |       |
| 44    | 2027-17-0  | 2-Isopropyl-naphthalene                       |                     |       |
| 44    | 2049-95-8  | tert-Pentylbenzene                            |                     |       |
| 44    | 2082-59-9  | valeric anhydride                             |                     |       |
| 44    | 20959-33-5 | Heptadecane, 7-methyl-                        |                     |       |
| 44    | 21195-59-5 | 1,5,8-p-Menthatriene                          |                     |       |
| 44    | 2131-41-1  | 1,4,5-Trimethylnaphthalene                    |                     |       |
| 44    | 21524-26-5 | Cyclohexene, 4-butyl-                         |                     |       |
| 44    | 21693-54-9 | 5,7-Dimethyltetralin                          |                     |       |
| 44    | 2189-60-8  | Benzene, octyl-                               |                     |       |
| 44    | 22089-89-0 | 7-pentadecyne                                 |                     |       |
| 44    | 2216-34-4  | 4-Methyloctane                                |                     |       |
| 44    | 2234-20-0  | 2,4-Dimethylstyrene                           |                     |       |
| 44    | 2245-38-7  | 1,6,7-Trimethylnaphthalene                    |                     |       |
| 44    | 22531-20-0 | 6-Ethyl-1,2,3,4-tetrahydronaphthalene         |                     |       |
| 44    | 2292-79-7  | Congressane                                   |                     |       |
| 44    | 23051-84-5 | 5-Tridecene, (5E)-                            |                     |       |
| 44    | 23342-25-8 | 2,2,5,7-Tetramethyltetralin                   |                     |       |
| 44    | 23609-46-3 | cyclooctane, 1,2-diethyl-                     |                     |       |
| 44    | 2363-88-4  | 2,4-Decadienal                                |                     |       |
| 44    | 2399-48-6  | Tetrahydrofurfuryl acrylate                   |                     |       |
| 44    | 2416-20-8  | hexadecenoic acid, z-11-                      |                     |       |
| 44    | 2435-85-0  | Hexadecahydropyrene                           |                     |       |
| 44    | 25117-24-2 | 4-Methyltetradecane                           |                     |       |
| 44    | 25117-31-1 | 5-Methyltridecane                             |                     |       |
| 44    | 25117-32-2 | 5-Methyltetradecane                           |                     |       |
| 44    | 25117-35-5 | Octadecane, 5-methyl-                         |                     |       |
| 44    | 25419-33-4 | naphthalene, 1,2,3,4-tetrahydro-1,8-dimethyl- |                     |       |
| 44    | 25524-42-9 | 5-Tridecene, (Z)-                             |                     |       |
| 44    | 26429-11-8 | 4-Methylheptadecane                           |                     |       |
| 44    | 26730-12-1 | 4-Methyltridecane                             |                     |       |
| 44    | 26730-20-1 | 7-Methylhexadecane                            |                     |       |
| 44    | 27554-26-3 | Diisooctyl phthalate                          |                     |       |
| 44    | 28071-99-0 | trans-anti-trans-tetra-decahydroanthracene    |                     |       |
| 44    | 2809-64-5  | Naphthalene, 1,2,3,4-tetrahydro-5-methyl-     |                     |       |
| 44    | 286-20-4   | Cyclohexene oxide                             |                     |       |
| 44    | 2882-96-4  | pentadecane, 3-methyl-                        |                     |       |
| 44    | 28980-74-7 | 3,5-Dodecadiene, 2-methyl-                    |                     |       |
| 44    | 294-62-2   | Cyclododecane                                 |                     |       |
| 44    | 295-17-0   | Cyclotetradecane                              |                     |       |
| 44    | 2958-76-1  | Decahydro-2-methylnaphthalene                 |                     |       |
| 44    | 29799-19-7 | Cyclohexane, 1-(1,5-dimethylhexyl)-4-methyl-  |                     |       |
| 44    | 2980-69-0  | 4-Methylundecane                              |                     |       |
| 44    | 3031-15-0  | 1,2,3,4-Tetramethylnaphthalene                |                     |       |
| 44    | 30316-17-7 | 1,2,3,4-Tetrahydro-2,5,8-trimethylnaphthalene |                     |       |
| 44    | 30654-45-6 | Naphthalene, 6-butyl-1,2,3,4-tetrahydro-      |                     |       |
| 44    | 31295-56-4 | 2,6,11-Trimethyldodecane                      |                     |       |
| 44    | 3178-23-2  | Dicyclohexylmethane                           |                     |       |
| 44    | 32367-54-7 | Naphthalene, 2-ethyl-1,2,3,4-tetrahydro-      |                     |       |
| 44    | 3333-52-6  | Tetramethylsuccinonitrile                     |                     |       |
| 44    | 334-48-5   | Decanoic acid                                 |                     |       |
| 44    | 34303-81-6 | 3-Hexadecene, (Z)-                            |                     |       |
| 44    | 35216-11-6 | 7-Tetradecyne                                 |                     |       |
| 44    | 35365-59-4 | 9-Octadecyne                                  |                     |       |
| 44    | 3777-69-3  | 2-Pentylfuran                                 |                     |       |
| 44    | 3877-19-8  | Naphthalene, 1,2,3,4-tetrahydro-2-methyl-     |                     |       |
| 44    | 3891-98-3  | 2,6,10-Trimethyldodecane                      |                     |       |
| 44    | 3892-00-0  | 2,6,10-Trimethylpentadecane                   |                     |       |
| 44    | 4032-93-3  | heptane, 2,3,6-trimethyl-                     |                     |       |
| 44    | 40650-41-7 | 1,1,5-Trimethylindan                          |                     |       |
| 44    | 4132-72-3  | Benzene, 1,4-dimethyl-2-(1-methylethyl)-      |                     |       |

SI Table 4a: 1198 chemicals reported as being detected in produced water, by reference

| Refid | CAS        | Name                                                 | Conc (Max reported) | Units |
|-------|------------|------------------------------------------------------|---------------------|-------|
| 44    | 41446-57-5 | 3-Tridecene, (3E)-                                   |                     |       |
| 44    | 41446-59-7 | 2-tridecene, (z)-                                    |                     |       |
| 44    | 41446-60-0 | 7-Tetradecene, (Z)-                                  |                     |       |
| 44    | 41446-65-5 | 4-Tetradecene, (Z)-                                  |                     |       |
| 44    | 41446-66-6 | 5-tetradecene, (e)-                                  |                     |       |
| 44    | 41446-68-8 | 3-Tetradecene, (E)-                                  |                     |       |
| 44    | 41446-78-0 | 4-Tetradecene, (4E)-                                 |                     |       |
| 44    | 4175-53-5  | 1H-Indene, 2,3-dihydro-1,3-dimethyl-                 |                     |       |
| 44    | 4175-54-6  | Naphthalene, 1,2,3,4-tetrahydro-1,4-dimethyl-        |                     |       |
| 44    | 41977-45-1 | Bicyclo[4.1.0]heptane, 7-pentyl-                     |                     |       |
| 44    | 41977-48-4 | bicyclo[4.1.0]heptane, 3-methyl-7-pentyl-            |                     |       |
| 44    | 4218-48-8  | Benzene, 1-ethyl-4-(1-methylethyl)-                  |                     |       |
| 44    | 42775-75-7 | naphthalene, 5-ethyl-1,2,3,4-tetrahydro-             |                     |       |
| 44    | 42775-77-9 | 6-n-Propyltetralin                                   |                     |       |
| 44    | 4291-79-6  | 1-Methyl-2-propyl-cyclohexane                        |                     |       |
| 44    | 4292-75-5  | Hexylcyclohexane                                     |                     |       |
| 44    | 4292-92-6  | Pentylcyclohexane                                    |                     |       |
| 44    | 4359-46-0  | 1,3-Dioxolane, 2-ethyl-4-methyl-                     |                     |       |
| 44    | 4413-16-5  | Benzene, (1-cyclohexylethyl)-                        |                     |       |
| 44    | 4413-21-2  | 1,1-Dicyclopentylethane                              |                     |       |
| 44    | 4431-89-4  | (Cyclopentylmethyl)cyclohexane                       |                     |       |
| 44    | 4457-00-5  | Cyclopentane, hexyl-                                 |                     |       |
| 44    | 4701-36-4  | Benzene, (1-ethyl-1-propenyl)-                       |                     |       |
| 44    | 4706-90-5  | 1,3-Dimethyl-5-isopropylbenzene                      |                     |       |
| 44    | 475-03-6   | 1,2,3,4-Tetrahydro-1,1,6-trimethylnaphthalene        |                     |       |
| 44    | 480-72-8   | Acenaphthylene, 1,2,2a,3,4,5-hexahydro-              |                     |       |
| 44    | 490-65-3   | 1-Methyl-7-isopropyl-naphthalene                     |                     |       |
| 44    | 4912-92-9  | 1,1-Dimethylindan                                    |                     |       |
| 44    | 4920-99-4  | Benzene, 1-ethyl-3-(1-methylethyl)-                  |                     |       |
| 44    | 493-02-7   | Naphthalene, decahydro-, trans-                      |                     |       |
| 44    | 503-74-2   | Isovaleric acid                                      |                     |       |
| 44    | 506-43-4   | (Z,Z)-9,12-Octadecadien-1-ol                         |                     |       |
| 44    | 50991-08-7 | 1,1'-Bicyclohexyl, 2-methyl-, cis-                   |                     |       |
| 44    | 50991-09-8 | 1,1'-Bicyclohexyl, 2-methyl-, trans-                 |                     |       |
| 44    | 50991-12-3 | 1,1'-Bicyclohexyl, 2-ethyl-, cis-                    |                     |       |
| 44    | 50991-13-4 | 1,1'-Bicyclohexyl, 2-ethyl-, trans-                  |                     |       |
| 44    | 526-73-8   | 1,2,3-Trimethylbenzene                               |                     |       |
| 44    | 52845-07-5 | Isoeicosane                                          |                     |       |
| 44    | 52914-66-6 | Cyclopentadecanone, 2-methyl-                        |                     |       |
| 44    | 529-34-0   | 1,2,3,4-Tetrahydronaphthalen-1-one                   |                     |       |
| 44    | 53485-49-7 | Tricyclo[6.4.0.0(2,7)]dodecane                       |                     |       |
| 44    | 53535-33-4 | Heptanol                                             |                     |       |
| 44    | 535-77-3   | m-Cymene                                             |                     |       |
| 44    | 538-68-1   | Pentylbenzene                                        |                     |       |
| 44    | 538-86-3   | Benzyl methyl ether                                  |                     |       |
| 44    | 5402-53-9  | Chloromethyl propanoate                              |                     |       |
| 44    | 54105-66-7 | Undecylcyclohexane                                   |                     |       |
| 44    | 54105-77-0 | (2-methylbutyl)cyclohexane                           |                     |       |
| 44    | 542-28-9   | Tetrahydro-2H-pyran-2-one                            |                     |       |
| 44    | 54290-12-9 | 7-heptadecene                                        |                     |       |
| 44    | 54410-74-1 | 1-Methyl-2-(1-ethylpropyl)benzene                    |                     |       |
| 44    | 54411-00-6 | cyclohexane, 1-methyl-4-(1-methylbutyl)-             |                     |       |
| 44    | 54411-01-7 | 1-Methyl-2-pentylcyclohexane                         |                     |       |
| 44    | 544-25-2   | 1,3,5-Cycloheptatriene                               |                     |       |
| 44    | 544-63-8   | Tetradecanoic acid                                   |                     |       |
| 44    | 544-76-3   | Hexadecane                                           |                     |       |
| 44    | 54676-39-0 | 2-BUTYL-1,1,3-TRIMETHYL-CYCLOHEXANE                  |                     |       |
| 44    | 54766-91-5 | Bicyclo[10.1.0]tridec-1-ene                          |                     |       |
| 44    | 54823-97-1 | cis-1-(Cyclohexylmethyl)-4-methylcyclohexane         |                     |       |
| 44    | 54823-98-2 | Cyclohexane, 1-(cyclohexylmethyl)-4-methyl-, trans-  |                     |       |
| 44    | 54832-83-6 | 1H-Indene, octahydro-2,2,4,4,7,7-hexamethyl-, trans- |                     |       |
| 44    | 54965-05-8 | Cyclohexane, 1,1,3-trimethyl-2-(3-methylpentyl)-     |                     |       |
| 44    | 55030-62-1 | Tridecane, 4,8-dimethyl-                             |                     |       |
| 44    | 5557-93-7  | Benzene, 1-(1-methylethenyl)-2-(1-methylethyl)-      |                     |       |
| 44    | 556-67-2   | Octamethylcyclotetrasiloxane                         |                     |       |
| 44    | 55669-88-0 | 1-Isobutyl-2,5-dimethylbenzene                       |                     |       |
| 44    | 55682-81-0 | 3-tert-Butyl-1,2-dihydronaphthalene                  |                     |       |
| 44    | 56325-56-5 | Cyclodecene, 3-bromo-                                |                     |       |
| 44    | 565-67-3   | 3-Pentanol, 2-methyl-                                |                     |       |
| 44    | 57-10-3    | Hexadecanoic acid                                    |                     |       |
| 44    | 5743-97-5  | phenanthrene, tetradecahydro-                        |                     |       |
| 44    | 581-40-8   | 2,3-Dimethylnaphthalene                              |                     |       |

SI Table 4a: 1198 chemicals reported as being detected in produced water, by reference

| Refid | CAS         | Name                                       | Conc (Max reported) | Units |
|-------|-------------|--------------------------------------------|---------------------|-------|
| 44    | 581-42-0    | 2,6-Dimethylnaphthalene                    |                     |       |
| 44    | 58175-57-8  | 1-Pentanol, 2-propyl-                      |                     |       |
| 44    | 584-02-1    | 3-Pentanol                                 |                     |       |
| 44    | 5842-53-5   | 2,2,4-Trimethylpent-3-en-1-ol              |                     |       |
| 44    | 589-98-0    | 3-octanol                                  |                     |       |
| 44    | 591-11-7    | 2(5H)-Furanone, 5-methyl-                  |                     |       |
| 44    | 592-27-8    | 2-Methylheptane                            |                     |       |
| 44    | 593-45-3    | Octadecane                                 |                     |       |
| 44    | 593-49-7    | Heptacosane                                |                     |       |
| 44    | 594-61-6    | 2-Hydroxyisobutyric acid                   |                     |       |
| 44    | 597-49-9    | 3-Pentanol, 3-ethyl-                       |                     |       |
| 44    | 6006-33-3   | Cyclohexane, tridecyl-                     |                     |       |
| 44    | 60212-33-1  | 4-Tetradecyne                              |                     |       |
| 44    | 60274-60-4  | Pentane, 1-chloro-5-iodo-                  |                     |       |
| 44    | 6044-71-9   | Dodecane, 6-methyl-                        |                     |       |
| 44    | 605-39-0    | 1,1'-Biphenyl, 2,2'-dimethyl-              |                     |       |
| 44    | 61142-19-6  | (1,3-Dimethylbutyl)cyclohexane             |                     |       |
| 44    | 61142-38-9  | Cyclohexane, (3-methylpentyl)-             |                     |       |
| 44    | 61142-66-3  | cyclopentene, 5-hexyl-3,3-dimethyl-        |                     |       |
| 44    | 61142-68-5  | 1-Hexyl-3-methylcyclopentane               |                     |       |
| 44    | 61142-70-9  | 2,4-Diethyl-1-methylcyclohexane            |                     |       |
| 44    | 6117-97-1   | 4-Methyldodecane                           |                     |       |
| 44    | 61208-94-4  | Cyclohexane, (1-methylbutyl)-              |                     |       |
| 44    | 61233-71-4  | 1,6,9-tetradecatriene                      |                     |       |
| 44    | 613-33-2    | 4,4'-Dimethylbiphenyl                      |                     |       |
| 44    | 61413-70-5  | Chloromethyl octanoate                     |                     |       |
| 44    | 6165-44-2   | Cyclohexane, 1,1'-(1,4-butanediyl)bis-     |                     |       |
| 44    | 61886-62-2  | 3-Hexadecyne                               |                     |       |
| 44    | 620-14-4    | 3-Ethyltoluene                             |                     |       |
| 44    | 62016-19-7  | octane, 6-ethyl-2-methyl-                  |                     |       |
| 44    | 62016-28-8  | 2,2,6-Trimethyloctane                      |                     |       |
| 44    | 62016-37-9  | 2,4,6-Trimethyloctane                      |                     |       |
| 44    | 62108-21-8  | Decane, 6-ethyl-2-methyl-                  |                     |       |
| 44    | 62183-55-5  | 3-Ethyl-2,7-dimethyloctane                 |                     |       |
| 44    | 62199-51-3  | 1-Pentyl-2-propylcyclopentane              |                     |       |
| 44    | 62199-52-4  | 1,2-Dibutylcyclopentane                    |                     |       |
| 44    | 62238-29-3  | cyclohexane, 1-ethyl-1,3-dimethyl-, trans- |                     |       |
| 44    | 62238-33-9  | cyclohexane, 1-ethyl-2-propyl-             |                     |       |
| 44    | 623-55-2    | 3-Hexanol, 5-methyl-                       |                     |       |
| 44    | 625-31-0    | 4-Penten-2-ol                              |                     |       |
| 44    | 626-98-2    | 2-Pentenoic acid                           |                     |       |
| 44    | 629-50-5    | Tridecane                                  |                     |       |
| 44    | 629-59-4    | Tetradecane                                |                     |       |
| 44    | 629-62-9    | Pentadecane                                |                     |       |
| 44    | 629-78-7    | Heptadecane                                |                     |       |
| 44    | 629-89-0    | Octadecyne                                 |                     |       |
| 44    | 629-92-5    | Nonadecane                                 |                     |       |
| 44    | 6305-52-8   | 2-n-Butyldecahydronaphthalene              |                     |       |
| 44    | 638-29-9    | Valeryl chloride                           |                     |       |
| 44    | 638-36-8    | 2,6,10,14-Tetramethylhexadecane            |                     |       |
| 44    | 638-60-8    | 2-Tetradecene                              |                     |       |
| 44    | 6418-41-3   | tridecane, 3-methyl-                       |                     |       |
| 44    | 6418-44-6   | heptadecane, 3-methyl-                     |                     |       |
| 44    | 643-93-6    | 3-Methylbiphenyl                           |                     |       |
| 44    | 645-10-3    | 1,7-dimethyl-4-(1-methylethyl)cyclodecane  |                     |       |
| 44    | 65-85-0     | Benzoic acid                               |                     |       |
| 44    | 66-25-1     | Hexanal                                    |                     |       |
| 44    | 66542-51-6  | Chloromethyl hexanoate                     |                     |       |
| 44    | 66552-62-3  | Naphthalene, decahydro-1,5-dimethyl-       |                     |       |
| 44    | 66660-42-2  | cis, cis-3-ethylbicyclo[4.4.0]decane       |                     |       |
| 44    | 6682-71-9   | 4,7-Dimethylindan                          |                     |       |
| 44    | 6750-34-1   | 1-dodecanol, 3,7,11-trimethyl-             |                     |       |
| 44    | 68603-15-6  | Alcohols, C6-12                            |                     |       |
| 44    | 695-06-7    | gamma-Caprolactone                         |                     |       |
| 44    | 6975-98-0   | 2-Methyldecane                             |                     |       |
| 44    | 6982-25-8   | DL-2,3-Butanediol                          |                     |       |
| 44    | 698-76-0    | delta-Octanolactone                        |                     |       |
| 44    | 700000-97-1 | 2,3,3-Trimethyl-1-hexene                   |                     |       |
| 44    | 700-12-9    | Benzene, pentamethyl-                      |                     |       |
| 44    | 702-79-4    | 1,3-Dimethyladamantane                     |                     |       |
| 44    | 7045-71-8   | 2-Methylundecane                           |                     |       |
| 44    | 705-86-2    | 6-Pentyltetrahydro-2H-pyran-2-one          |                     |       |

SI Table 4a: 1198 chemicals reported as being detected in produced water, by reference

| Refid | CAS         | Name                                                                 | Conc (Max reported) | Units |
|-------|-------------|----------------------------------------------------------------------|---------------------|-------|
| 44    | 706-14-9    | gamma-Decanolactone                                                  |                     |       |
| 44    | 707-35-7    | 1,3,5-Trimethyladamantane                                            |                     |       |
| 44    | 7206-14-6   | 3-Dodecene, (E)-                                                     |                     |       |
| 44    | 7206-19-1   | 3-Octadecene, (E)-                                                   |                     |       |
| 44    | 7206-25-9   | 9-octadecene, (e)-                                                   |                     |       |
| 44    | 72218-58-7  | 3-Methylheptyl acetate                                               |                     |       |
| 44    | 73105-67-6  | 1-Iodo-2-methylundecane                                              |                     |       |
| 44    | 7326-46-7   | 2-Furanol, tetrahydro-2-methyl-                                      |                     |       |
| 44    | 74054-92-5  | 1,1,6,6-tetramethylspiro[4.4]nonane                                  |                     |       |
| 44    | 74367-34-3  | 3-Hydroxy-2,4,4-trimethylpentyl 2-methylpropanoate                   |                     |       |
| 44    | 74646-37-0  | 1-Tridecyn-4-ol                                                      |                     |       |
| 44    | 764-96-5    | (5Z)-5-Undecene                                                      |                     |       |
| 44    | 767-58-8    | Indan, 1-methyl-                                                     |                     |       |
| 44    | 77877-94-2  | Chloromethyl pentanoate                                              |                     |       |
| 44    | 78-67-1     | Azobisisobutyronitrile                                               |                     |       |
| 44    | 79273-13-5  | dispiro[4.2.4.2]tetradecane                                          |                     |       |
| 44    | 79-31-2     | 2-Methylpropanoic acid                                               |                     |       |
| 44    | 80625-32-7  | 1,e-8,z-10-pentadecatriene                                           |                     |       |
| 44    | 80655-44-3  | Decahydro-4,4,8,9,10-pentamethylnaphthalene                          |                     |       |
| 44    | 821-55-6    | 2-Nonanone                                                           |                     |       |
| 44    | 823-22-3    | 2H-Pyran-2-one, tetrahydro-6-methyl-                                 |                     |       |
| 44    | 825-51-4    | 2-Naphthalenol, decahydro-                                           |                     |       |
| 44    | 826-18-6    | Benzene, 1-pentenyl-                                                 |                     |       |
| 44    | 827-52-1    | Cyclohexylbenzene                                                    |                     |       |
| 44    | 83-33-0     | 1H-Inden-1-one, 2,3-dihydro-                                         |                     |       |
| 44    | 84-69-5     | Diisobutyl phthalate                                                 |                     |       |
| 44    | 84-74-2     | Dibutyl phthalate                                                    |                     |       |
| 44    | 871-83-0    | 2-Methylnonane                                                       |                     |       |
| 44    | 87-41-2     | Phthalide                                                            |                     |       |
| 44    | 874-35-1    | 5-Methylindan                                                        |                     |       |
| 44    | 877-44-1    | 1,2,4-Triethylbenzene                                                |                     |       |
| 44    | 91-20-3     | Naphthalene                                                          |                     |       |
| 44    | 91531-54-3  | 1,1,3a-trimethyl-1a,3a,5,6-tetrahydro-1h-cyclopropa[c]pentalen-4-one |                     |       |
| 44    | 91-57-6     | 2-Methylnaphthalene                                                  |                     |       |
| 44    | 92013-16-6  | 1H-Indene, 2,3-dihydro-4-propyl-                                     |                     |       |
| 44    | 92-51-3     | Dicyclohexyl                                                         |                     |       |
| 44    | 93-53-8     | Hydratropaldehyde                                                    |                     |       |
| 44    | 93-55-0     | 1-Phenylpropan-1-one                                                 |                     |       |
| 44    | 939-27-5    | 2-Ethyl-naphthalene                                                  |                     |       |
| 44    | 95-16-9     | Benzothiazole                                                        |                     |       |
| 44    | 959028-24-1 | 4-Ethyl-2,3-dimethylhex-2-ene                                        |                     |       |
| 44    | 95-93-2     | 1,2,4,5-Tetramethylbenzene                                           |                     |       |
| 44    | 98-54-4     | 4-tert-Butylphenol                                                   |                     |       |
| 44    | 98-82-8     | Cumene                                                               |                     |       |
| 44    | 98-86-2     | Acetophenone                                                         |                     |       |
| 44    | 99328-46-8  | 5-Methyl-1-hepten-4-ol                                               |                     |       |
| 44    | 99-87-6     | p-Cymene                                                             |                     |       |
| 45    | 7440-09-7   | Potassium                                                            | 515                 | mg/L  |
| 45    | 14127-61-8  | Calcium ion                                                          | 4810                | mg/L  |
| 45    | 14808-79-8  | Sulfate                                                              | 2420                | mg/L  |
| 45    | 16887-00-6  | Chloride                                                             | 56200               | mg/L  |
| 45    | 24959-67-9  | Bromide                                                              | 292                 | mg/L  |
| 45    | 71-52-3     | Bicarbonate                                                          | 495                 | mg/L  |
| 45    | 7439-95-4   | Magnesium                                                            | 1500                | mg/L  |
| 45    | 7440-24-6   | Strontium                                                            | 108                 | mg/L  |
| 46    | 14808-79-8  | Sulfate                                                              | 69.1632             | mg/L  |
| 46    | 15035-72-0  | Hydrosulfide                                                         | 102.517             | mg/L  |
| 46    | 71-50-1     | Acetate                                                              | 312.9385            | mg/L  |
| 46    | 72-03-7     | Propanoate                                                           | 31.42096            | mg/L  |
| 47    | 7429-90-5   | Aluminum                                                             | 1.817206618         | mg/L  |
| 47    | 7439-89-6   | Iron                                                                 | 0.46183815          | mg/L  |
| 47    | 7439-96-5   | Manganese                                                            | 0.065376272         | mg/L  |
| 47    | 7439-98-7   | Molybdenum                                                           | 0.0028785           | mg/L  |
| 47    | 7440-38-2   | Arsenic                                                              | 0.009739807         | mg/L  |
| 47    | 7440-39-3   | Barium                                                               | 0.61385169          | mg/L  |
| 47    | 7440-42-8   | Boron                                                                | 0.164312            | mg/L  |
| 47    | 7440-47-3   | Chromium                                                             | 0.011959103         | mg/L  |
| 47    | 7440-50-8   | Copper                                                               | 0.01969926          | mg/L  |
| 47    | 7440-66-6   | Zinc                                                                 | 0.0183064           | mg/L  |
| 47    | 7782-49-2   | Selenium                                                             | 0.00236913          | mg/L  |
| 48    | 7440-09-7   | Potassium                                                            | 363                 | mg/L  |
| 48    | 14127-61-8  | Calcium ion                                                          | 2935                | mg/L  |



SI Table 4a: 1198 chemicals reported as being detected in produced water, by reference

| Refid | CAS         | Name                                           | Conc (Max reported) | Units |
|-------|-------------|------------------------------------------------|---------------------|-------|
| 48    | 14808-79-8  | Sulfate                                        | 12.9                | mg/L  |
| 48    | 16887-00-6  | Chloride                                       | 28500               | mg/L  |
| 48    | 17341-25-2  | Sodium ion                                     | 12200               | mg/L  |
| 48    | 24959-67-9  | Bromide                                        | 19                  | mg/L  |
| 48    | 7429-90-5   | Aluminum                                       | 105                 | mg/L  |
| 48    | 7439-95-4   | Magnesium                                      | 104                 | mg/L  |
| 48    | 7440-24-6   | Strontium                                      | 591                 | mg/L  |
| 48    | 7440-39-3   | Barium                                         | 697                 | mg/L  |
| 49    | 100-41-4    | Ethylbenzene                                   | 7.34                | mg/L  |
| 49    | 100-42-5    | Styrene                                        | 52                  | mg/L  |
| 49    | 108-88-3    | Toluene                                        | 27.3                | mg/L  |
| 49    | 111-76-2    | 2-Butoxyethanol                                | 77.5                | mg/L  |
| 49    | 179601-23-1 | m,p-Xylene                                     | 40.1                | mg/L  |
| 49    | 2682-20-4   | 2-Methyl-3(2H)-isothiazolone                   | 9.51                | mg/L  |
| 49    | 68-12-2     | N,N-Dimethylformamide                          | 519                 | mg/L  |
| 49    | 71-43-2     | Benzene                                        | 4.56                | mg/L  |
| 49    | 79-06-1     | Acrylamide                                     | 99.2                | mg/L  |
| 49    | 91-20-3     | Naphthalene                                    | 3.54                | mg/L  |
| 49    | 95-47-6     | o-Xylene                                       | 15                  | mg/L  |
| 49    | 95-63-6     | 1,2,4-Trimethylbenzene                         | 78.5                | mg/L  |
| 49    | 98-82-8     | Cumene                                         | 4.21                | mg/L  |
| 50    | 100-41-4    | Ethylbenzene                                   | 399.84              | mg/L  |
| 50    | 103-65-1    | Propylbenzene                                  |                     |       |
| 50    | 106-42-3    | p-Xylene                                       | 0.46                | mg/L  |
| 50    | 1074-43-7   | 1-Methyl-3-propylbenzene                       |                     |       |
| 50    | 108-88-3    | Toluene                                        | 5.61                | mg/L  |
| 50    | 108-90-7    | Chlorobenzene                                  | 0.35                | mg/L  |
| 50    | 109-66-0    | Pentane                                        |                     |       |
| 50    | 109-74-0    | Butanenitrile                                  |                     |       |
| 50    | 1768-36-1   | Propyl cyanate                                 |                     |       |
| 50    | 19261-13-3  | 1-(2-Furanyl)-3-butene-1,2-diol                |                     |       |
| 50    | 2406-25-9   | Di-tert-butyl nitroxide                        |                     |       |
| 50    | 25414-22-6  | 2-Methoxyfuran                                 |                     |       |
| 50    | 2717-39-7   | 1,4,5,8-Tetramethylnaphthalene                 |                     |       |
| 50    | 5618-62-2   | O-Isobutylhydroxylamine                        |                     |       |
| 50    | 591-48-0    | 3-Methylcyclohexene                            |                     |       |
| 50    | 71312-54-4  | 1,4-Dimethyl-2,3-diazabicyclo[2.2.1]hept-2-ene |                     |       |
| 50    | 71-43-2     | Benzene                                        | 778.51              | mg/L  |
| 50    | 85-01-8     | Phenanthrene                                   |                     |       |
| 50    | 89-74-7     | 1-(2,4-Dimethylphenyl)ethanone                 |                     |       |
| 50    | 91-57-6     | 2-Methylnaphthalene                            |                     |       |
| 50    | 96-04-8     | 2,3-Heptanedione                               |                     |       |
| 51    | 7440-09-7   | Potassium                                      | 10700               | mg/L  |
| 51    | 7783-06-4   | Hydrogen sulfide                               | 125                 | mg/L  |
| 51    | 14808-79-8  | Sulfate                                        | 197                 | mg/L  |
| 51    | 16887-00-6  | Chloride                                       | 201000              | mg/L  |
| 51    | 16984-48-8  | Fluoride                                       | 11.8                | mg/L  |
| 51    | 24959-67-9  | Bromide                                        | 2190                | mg/L  |
| 51    | 461-55-2    | Butyrate                                       | 3                   | mg/L  |
| 51    | 71-50-1     | Acetate                                        | 264                 | mg/L  |
| 51    | 72-03-7     | Propanoate                                     | 31                  | mg/L  |
| 51    | 7429-90-5   | Aluminum                                       | 0.367               | mg/L  |
| 51    | 7439-89-6   | Iron                                           | 465                 | mg/L  |
| 51    | 7439-92-1   | Lead                                           | 70.2                | mg/L  |
| 51    | 7439-93-2   | Lithium                                        | 74                  | mg/L  |
| 51    | 7439-95-4   | Magnesium                                      | 6180                | mg/L  |
| 51    | 7439-96-5   | Manganese                                      | 212                 | mg/L  |
| 51    | 7440-17-7   | Rubidium                                       | 19.6                | mg/L  |
| 51    | 7440-23-5   | Sodium                                         | 69300               | mg/L  |
| 51    | 7440-24-6   | Strontium                                      | 1940                | mg/L  |
| 51    | 7440-39-3   | Barium                                         | 196                 | mg/L  |
| 51    | 7440-42-8   | Boron                                          | 692                 | mg/L  |
| 51    | 7440-43-9   | Cadmium                                        | 0.99                | mg/L  |
| 51    | 7440-46-2   | Cesium                                         | 2.6                 | mg/L  |
| 51    | 7440-50-8   | Copper                                         | 0.061               | mg/L  |
| 51    | 7440-66-6   | Zinc                                           | 243                 | mg/L  |
| 51    | 7440-70-2   | Calcium                                        | 48600               | mg/L  |
| 51    | 7553-56-2   | Iodine                                         | 106                 | mg/L  |
| 51    | 7631-86-9   | Silica                                         | 53                  | mg/L  |
| 51    | 7664-41-7   | Ammonia                                        | 119                 | mg/L  |
| 51    | 79-31-2     | 2-Methylpropanoic acid                         | 4                   | mg/L  |
| 52    | 7440-09-7   | Potassium                                      | 99                  | mg/L  |

SI Table 4a: 1198 chemicals reported as being detected in produced water, by reference

| Refid | CAS        | Name                       | Conc (Max reported) | Units |
|-------|------------|----------------------------|---------------------|-------|
| 52    | 103-65-1   | Propylbenzene              | 0.00051             | mg/L  |
| 52    | 108-10-1   | 4-Methyl-2-pentanone       | 0.04                | mg/L  |
| 52    | 108-67-8   | 1,3,5-Trimethylbenzene     | 0.023               | mg/L  |
| 52    | 14808-79-8 | Sulfate                    | 560                 | mg/L  |
| 52    | 16887-00-6 | Chloride                   | 16000               | mg/L  |
| 52    | 17341-25-2 | Sodium ion                 | 10000               | mg/L  |
| 52    | 24959-67-9 | Bromide                    | 260                 | mg/L  |
| 52    | 7439-95-4  | Magnesium                  | 200                 | mg/L  |
| 52    | 7440-70-2  | Calcium                    | 1000                | mg/L  |
| 52    | 75-09-2    | Dichloromethane            | 0.0026              | mg/L  |
| 52    | 75-65-0    | tert-Butyl alcohol         | 0.071               | mg/L  |
| 52    | 78-93-3    | Methyl ethyl ketone        | 0.098               | mg/L  |
| 52    | 95-47-6    | o-Xylene                   | 0.003               | mg/L  |
| 52    | 95-63-6    | 1,2,4-Trimethylbenzene     | 0.002               | mg/L  |
| 52    | 98-82-8    | Cumene                     | 0.00054             | mg/L  |
| 53    | 7440-09-7  | Potassium                  |                     |       |
| 53    | 14808-79-8 | Sulfate                    |                     |       |
| 53    | 16887-00-6 | Chloride                   |                     |       |
| 53    | 3812-32-6  | Carbonate                  |                     |       |
| 53    | 71-52-3    | Bicarbonate                |                     |       |
| 53    | 7429-90-5  | Aluminum                   |                     |       |
| 53    | 7439-89-6  | Iron                       |                     |       |
| 53    | 7439-95-4  | Magnesium                  |                     |       |
| 53    | 7440-21-3  | Silicon                    |                     |       |
| 53    | 7440-23-5  | Sodium                     |                     |       |
| 53    | 7440-24-6  | Strontium                  |                     |       |
| 53    | 7440-39-3  | Barium                     |                     |       |
| 53    | 7440-42-8  | Boron                      |                     |       |
| 53    | 7440-67-7  | Zirconium                  |                     |       |
| 53    | 7440-70-2  | Calcium                    |                     |       |
| 54    | 7440-09-7  | Potassium                  | 183.992             | mg/L  |
| 54    | 14127-61-8 | Calcium ion                | 2344.824476         | mg/L  |
| 54    | 14808-79-8 | Sulfate                    | 10.71666667         | mg/L  |
| 54    | 15438-31-0 | Fe +2 ion                  | 83.89098657         | mg/L  |
| 54    | 16887-00-6 | Chloride                   | 58540               | mg/L  |
| 54    | 17341-25-2 | Sodium ion                 | 28049.04918         | mg/L  |
| 54    | 24959-67-9 | Bromide                    | 292.0182728         | mg/L  |
| 54    | 7439-95-4  | Magnesium                  | 1911.606746         | mg/L  |
| 55    | 16887-00-6 | Chloride                   | 9794                | mg/L  |
| 55    | 17341-25-2 | Sodium ion                 | 4106                | mg/L  |
| 56    | 14798-03-9 | Ammonium                   | 1469                | mg/L  |
| 56    | 14808-79-8 | Sulfate                    | 131                 | mg/L  |
| 56    | 16887-00-6 | Chloride                   | 88457               | mg/L  |
| 56    | 24959-67-9 | Bromide                    | 409                 | mg/L  |
| 56    | 71-52-3    | Bicarbonate                | 353                 | mg/L  |
| 56    | 7429-90-5  | Aluminum                   | 0.612               | mg/L  |
| 56    | 7439-89-6  | Iron                       | 18.097              | mg/L  |
| 56    | 7439-92-1  | Lead                       | 1.047               | mg/L  |
| 56    | 7439-93-2  | Lithium                    | 22.779              | mg/L  |
| 56    | 7439-95-4  | Magnesium                  | 790                 | mg/L  |
| 56    | 7439-96-5  | Manganese                  | 11.464              | mg/L  |
| 56    | 7440-02-0  | Nickel                     | 0.497               | mg/L  |
| 56    | 7440-17-7  | Rubidium                   | 8.111               | mg/L  |
| 56    | 7440-23-5  | Sodium                     | 38701               | mg/L  |
| 56    | 7440-24-6  | Strontium                  | 582                 | mg/L  |
| 56    | 7440-28-0  | Thallium                   | 0.134               | mg/L  |
| 56    | 7440-39-3  | Barium                     | 13.563              | mg/L  |
| 56    | 7440-42-8  | Boron                      | 163.298             | mg/L  |
| 56    | 7440-43-9  | Cadmium                    | 0.019               | mg/L  |
| 56    | 7440-48-4  | Cobalt                     | 0.105               | mg/L  |
| 56    | 7440-50-8  | Copper                     | 0.127               | mg/L  |
| 56    | 7440-62-2  | Vanadium                   | 0.683               | mg/L  |
| 56    | 7440-66-6  | Zinc                       | 8.36                | mg/L  |
| 56    | 7440-70-2  | Calcium                    | 9081                | mg/L  |
| 56    | 7782-49-2  | Selenium                   | 0.65                | mg/L  |
| 57    | 7440-09-7  | Potassium                  | 101.3               | mg/L  |
| 57    | 105-67-9   | 2,4-Dimethylphenol         | 0.79                | mg/L  |
| 57    | 107-92-6   | Butanoic acid              | 19                  | mg/L  |
| 57    | 108-95-2   | Phenol                     | 0.83                | mg/L  |
| 57    | 117-81-7   | Di(2-ethylhexyl) phthalate | 0.029               | mg/L  |
| 57    | 123-91-1   | 1,4-Dioxane                | 0.06                | mg/L  |
| 57    | 129-00-0   | Pyrene                     | 0.0009              | mg/L  |

SI Table 4a: 1198 chemicals reported as being detected in produced water, by reference

| Refid | CAS        | Name                                    | Conc (Max reported) | Units |
|-------|------------|-----------------------------------------|---------------------|-------|
| 57    | 131-11-3   | Dimethyl phthalate                      | 0.015               | mg/L  |
| 57    | 1319-77-3  | Cresol                                  | 0.17                | mg/L  |
| 57    | 1330-20-7  | Xylenes                                 | 0.03                | mg/L  |
| 57    | 14797-55-8 | Nitrate                                 | 5.2                 | mg/L  |
| 57    | 14808-79-8 | Sulfate                                 | 1.3                 | mg/L  |
| 57    | 16887-00-6 | Chloride                                | 13600               | mg/L  |
| 57    | 18496-25-8 | Sulfide                                 | 0.31                | mg/L  |
| 57    | 24959-67-9 | Bromide                                 | 87.2                | mg/L  |
| 57    | 57-12-5    | Cyanide                                 | 0.055               | mg/L  |
| 57    | 64-19-7    | Acetic acid                             | 1600                | mg/L  |
| 57    | 67-64-1    | Acetone                                 | 16                  | mg/L  |
| 57    | 68140-01-2 | N-[3-(Dimethylamino)propyl] coco amides |                     |       |
| 57    | 71060-57-6 | Oxanol KD-6                             |                     |       |
| 57    | 7429-90-5  | Aluminum                                | 0.064               | mg/L  |
| 57    | 7439-89-6  | Iron                                    | 81.42               | mg/L  |
| 57    | 7439-93-2  | Lithium                                 | 3.519               | mg/L  |
| 57    | 7439-95-4  | Magnesium                               | 106.4               | mg/L  |
| 57    | 7439-96-5  | Manganese                               | 1.471               | mg/L  |
| 57    | 7440-02-0  | Nickel                                  | 0.042               | mg/L  |
| 57    | 7440-17-7  | Rubidium                                | 0.23                | mg/L  |
| 57    | 7440-21-3  | Silicon                                 | 19.65               | mg/L  |
| 57    | 7440-23-5  | Sodium                                  | 6943.9              | mg/L  |
| 57    | 7440-24-6  | Strontium                               | 60.25               | mg/L  |
| 57    | 7440-32-6  | Titanium                                | 0.028               | mg/L  |
| 57    | 7440-38-2  | Arsenic                                 | 0.067               | mg/L  |
| 57    | 7440-39-3  | Barium                                  | 8.542               | mg/L  |
| 57    | 7440-42-8  | Boron                                   | 3.105               | mg/L  |
| 57    | 7440-46-2  | Cesium                                  | 0.073               | mg/L  |
| 57    | 7440-47-3  | Chromium                                | 0.058               | mg/L  |
| 57    | 7440-50-8  | Copper                                  | 0.288               | mg/L  |
| 57    | 7440-62-2  | Vanadium                                | 0.12                | mg/L  |
| 57    | 7440-66-6  | Zinc                                    | 0.051               | mg/L  |
| 57    | 7440-70-2  | Calcium                                 | 524.1               | mg/L  |
| 57    | 7664-41-7  | Ammonia                                 | 24.7                | mg/L  |
| 57    | 78-93-3    | Methyl ethyl ketone                     | 0.24                | mg/L  |
| 57    | 79-09-4    | Propionic acid                          | 33                  | mg/L  |
| 57    | 85-01-8    | Phenanthrene                            | 0.003               | mg/L  |
| 57    | 85-68-7    | Benzyl butyl phthalate                  | 0.0042              | mg/L  |
| 57    | 91-57-6    | 2-Methylnaphthalene                     | 0.004               | mg/L  |
| 57    | 95-48-7    | o-Cresol                                | 0.15                | mg/L  |
| 58    | 14127-61-8 | Calcium ion                             | 435                 | mg/L  |
| 58    | 14808-79-8 | Sulfate                                 | 446                 | mg/L  |
| 58    | 16887-00-6 | Chloride                                | 15712               | mg/L  |
| 58    | 17341-25-2 | Sodium ion                              | 10199               | mg/L  |
| 58    | 71-52-3    | Bicarbonate                             | 3660                | mg/L  |
| 58    | 7429-90-5  | Aluminum                                | 16                  | mg/L  |
| 58    | 7439-89-6  | Iron                                    | 171.1               | mg/L  |
| 58    | 7439-95-4  | Magnesium                               | 57.7                | mg/L  |
| 58    | 7440-24-6  | Strontium                               | 60.4                | mg/L  |
| 58    | 7440-39-3  | Barium                                  | 15.5                | mg/L  |
| 58    | 7440-66-6  | Zinc                                    | 6.7                 | mg/L  |
| 59    | 7440-09-7  | Potassium                               | 10300               | mg/L  |
| 59    | 14808-79-8 | Sulfate                                 | 9164                | mg/L  |
| 59    | 16887-00-6 | Chloride                                | 48586               | mg/L  |
| 59    | 3812-32-6  | Carbonate                               | 35.92               | mg/L  |
| 59    | 71-52-3    | Bicarbonate                             | 1342                | mg/L  |
| 59    | 7439-89-6  | Iron                                    | 1744                | mg/L  |
| 59    | 7439-95-4  | Magnesium                               | 313                 | mg/L  |
| 59    | 7439-96-5  | Manganese                               | 824.56              | mg/L  |
| 59    | 7440-23-5  | Sodium                                  | 115205              | mg/L  |
| 59    | 7440-39-3  | Barium                                  | 897                 | mg/L  |
| 59    | 7440-42-8  | Boron                                   | 18.7                | mg/L  |
| 59    | 7440-70-2  | Calcium                                 | 1325                | mg/L  |
| 60    | 14383-50-7 | Thiosulfate                             | 19.05989            | mg/L  |
| 60    | 14808-79-8 | Sulfate                                 | 185.3958            | mg/L  |
| 60    | 15438-31-0 | Fe +2 ion                               | 656.72544           | mg/L  |
| 60    | 16887-00-6 | Chloride                                | 117000              | mg/L  |
| 60    | 18496-25-8 | Sulfide                                 | 8.015               | mg/L  |
| 60    | 71-50-1    | Acetate                                 | 10037.65            | mg/L  |
| 61    | 16887-00-6 | Chloride                                | 147436.3            | mg/L  |
| 61    | 7440-23-5  | Sodium                                  | 102715.6            | mg/L  |
| 61    | 7440-39-3  | Barium                                  | 7094.5              | mg/L  |

SI Table 4a: 1198 chemicals reported as being detected in produced water, by reference

| Refid | CAS         | Name                                                                                | Conc (Max reported) | Units |
|-------|-------------|-------------------------------------------------------------------------------------|---------------------|-------|
| 61    | 7440-70-2   | Calcium                                                                             | 31668.3             | mg/L  |
| 62    | 111-76-2    | 2-Butoxyethanol                                                                     |                     |       |
| 63    | 1849-76-9   | 3-bromo-5-chloro-4-hydroxybenzaldehyde                                              |                     |       |
| 63    | 3147-55-5   | Benzoic acid, 3,5-dibromo-2-hydroxy-                                                |                     |       |
| 63    | 53715-09-6  | Chloro(iodo)acetic acid                                                             |                     |       |
| 63    | 598-89-0    | Diiodoacetic acid                                                                   |                     |       |
| 63    | 6937-34-4   | 3-iodophthalic acid                                                                 |                     |       |
| 64    | 7440-09-7   | Potassium                                                                           | 48                  | mg/L  |
| 64    | 14797-55-8  | Nitrate                                                                             | 39                  | mg/L  |
| 64    | 14808-79-8  | Sulfate                                                                             | 21                  | mg/L  |
| 64    | 16887-00-6  | Chloride                                                                            | 7065                | mg/L  |
| 64    | 3812-32-6   | Carbonate                                                                           | 341                 | mg/L  |
| 64    | 71-52-3     | Bicarbonate                                                                         | 1396                | mg/L  |
| 64    | 7439-89-6   | Iron                                                                                | 0.2                 | mg/L  |
| 64    | 7439-95-4   | Magnesium                                                                           | 50                  | mg/L  |
| 64    | 7440-23-5   | Sodium                                                                              | 5111                | mg/L  |
| 64    | 7440-42-8   | Boron                                                                               | 30                  | mg/L  |
| 64    | 7440-50-8   | Copper                                                                              | 0.03                | mg/L  |
| 64    | 7440-66-6   | Zinc                                                                                | 0.06                | mg/L  |
| 64    | 7440-70-2   | Calcium                                                                             | 8                   | mg/L  |
| 65    | 123-86-4    | Butyl acetate                                                                       | 0.9                 | mg/L  |
| 65    | 50-00-0     | Formaldehyde                                                                        | 0.8                 | mg/L  |
| 65    | 67-64-1     | Acetone                                                                             | 2.4                 | mg/L  |
| 65    | 71-36-3     | 1-Butanol                                                                           | 16.5                | mg/L  |
| 65    | 75-07-0     | Acetaldehyde                                                                        | 0.1                 | mg/L  |
| 65    | 91-20-3     | Naphthalene                                                                         | 88.4                | mg/L  |
| 66    | 16887-00-6  | Chloride                                                                            | 160588.5            | mg/L  |
| 66    | 7439-93-2   | Lithium                                                                             | 274.13              | mg/L  |
| 67    | 2207-01-4   | (Z)-1,2-Dimethylcyclohexane                                                         |                     |       |
| 67    | 4810-09-7   | 3-Methyl-1-heptene                                                                  |                     |       |
| 67    | 5911-04-6   | 3-Methylnonane                                                                      |                     |       |
| 67    | 100-41-4    | Ethylbenzene                                                                        |                     |       |
| 67    | 1008-80-6   | 2,3-Dimethyldecahydronaphthalene                                                    |                     |       |
| 67    | 103-65-1    | Propylbenzene                                                                       |                     |       |
| 67    | 1072-05-5   | 2,6-Dimethylheptane                                                                 |                     |       |
| 67    | 1074-43-7   | 1-Methyl-3-propylbenzene                                                            |                     |       |
| 67    | 107-83-5    | 2-Methylpentane                                                                     |                     |       |
| 67    | 108-38-3    | m-Xylene                                                                            |                     |       |
| 67    | 108-67-8    | 1,3,5-Trimethylbenzene                                                              |                     |       |
| 67    | 108-87-2    | Methylcyclohexane                                                                   |                     |       |
| 67    | 108-88-3    | Toluene                                                                             |                     |       |
| 67    | 110-54-3    | n-Hexane                                                                            |                     |       |
| 67    | 111-65-9    | Octane                                                                              |                     |       |
| 67    | 111-67-1    | 2-Octene                                                                            |                     |       |
| 67    | 111-84-2    | Nonane                                                                              |                     |       |
| 67    | 1120-21-4   | Undecane                                                                            |                     |       |
| 67    | 112-40-3    | Dodecane                                                                            |                     |       |
| 67    | 112-41-4    | 1-Dodecene                                                                          |                     |       |
| 67    | 112-88-9    | 1-Octadecene                                                                        |                     |       |
| 67    | 112-89-0    | 1-Bromooctadecane                                                                   |                     |       |
| 67    | 112-95-8    | Eicosane                                                                            |                     |       |
| 67    | 117-81-7    | Di(2-ethylhexyl) phthalate                                                          |                     |       |
| 67    | 1192-18-3   | (Z)-1,2-Dimethylcyclopentane                                                        |                     |       |
| 67    | 119736-96-8 | 1',4'-Dihydroxy-7'-methoxy-2,3'-dimethyl-(-)-[1,2'-binaphthalene]-5,5',8,8'-tetrone |                     |       |
| 67    | 123-79-5    | Diocetyl hexanedioate                                                               |                     |       |
| 67    | 124-18-5    | Decane                                                                              |                     |       |
| 67    | 13150-81-7  | 2,6-Dimethyldecane                                                                  |                     |       |
| 67    | 13151-34-3  | 3-Methyldecane                                                                      |                     |       |
| 67    | 13151-35-4  | 5-Methyldecane                                                                      |                     |       |
| 67    | 13287-21-3  | 6-Methyltridecane                                                                   |                     |       |
| 67    | 13287-24-6  | 9-Methylnonadecane                                                                  |                     |       |
| 67    | 14113-60-1  | rel-(1R,2S)-1,2-Diethylcyclohexadecane                                              |                     |       |
| 67    | 142-82-5    | Heptane                                                                             |                     |       |
| 67    | 1560-93-6   | 2-Methylpentadecane                                                                 |                     |       |
| 67    | 1560-95-8   | 2-Methyltetradecane                                                                 |                     |       |
| 67    | 1560-96-9   | 2-Methyltridecane                                                                   |                     |       |
| 67    | 1560-97-0   | 2-Methyldodecane                                                                    |                     |       |
| 67    | 15869-86-0  | 4-Ethyldecane                                                                       |                     |       |
| 67    | 15869-93-9  | 3,5-Dimethyloctane                                                                  |                     |       |
| 67    | 1630-94-0   | 1,1-Dimethylcyclopropane                                                            |                     |       |
| 67    | 1640-89-7   | Ethylcyclopentane                                                                   |                     |       |
| 67    | 1678-91-7   | Ethylcyclohexane                                                                    |                     |       |

SI Table 4a: 1198 chemicals reported as being detected in produced water, by reference

| Refid | CAS         | Name                                                       | Conc (Max reported) | Units |
|-------|-------------|------------------------------------------------------------|---------------------|-------|
| 67    | 1678-92-8   | Propylcyclohexane                                          |                     |       |
| 67    | 1678-93-9   | Butylcyclohexane                                           |                     |       |
| 67    | 17301-23-4  | 2,6-Dimethylundecane                                       |                     |       |
| 67    | 17301-27-8  | 2,10-Dimethylundecane                                      |                     |       |
| 67    | 17301-28-9  | 3,6-Dimethylundecane                                       |                     |       |
| 67    | 17301-94-9  | 4-Methylnonane                                             |                     |       |
| 67    | 17302-32-8  | 3,7-Dimethylnonane                                         |                     |       |
| 67    | 17312-55-9  | 3,8-Dimethyldecane                                         |                     |       |
| 67    | 17312-80-0  | 2,4-Dimethylundecane                                       |                     |       |
| 67    | 1786-12-5   | 1,7,11-Trimethyl-4-(1-methylethyl)cyclotetradecane         |                     |       |
| 67    | 1795-16-0   | Decylcyclohexane                                           |                     |       |
| 67    | 1839-63-0   | 1,3,5-Trimethylcyclohexane                                 |                     |       |
| 67    | 18435-45-5  | 1-Nonadecene                                               |                     |       |
| 67    | 18835-32-0  | 1-Tricosene                                                |                     |       |
| 67    | 1921-70-6   | Norphytane                                                 |                     |       |
| 67    | 2040-96-2   | Propylcyclopentane                                         |                     |       |
| 67    | 2051-30-1   | 2,6-Dimethyloctane                                         |                     |       |
| 67    | 20524-86-1  | Bis(dichloromethyl) ether                                  |                     |       |
| 67    | 2131-41-1   | 1,4,5-Trimethylnaphthalene                                 |                     |       |
| 67    | 2131-42-2   | 1,4,6-Trimethylnaphthalene                                 |                     |       |
| 67    | 21693-55-0  | 1,5,7-Trimethyl-1,2,3,4-tetrahydronaphthalene              |                     |       |
| 67    | 2213-23-2   | 2,4-Dimethylheptane                                        |                     |       |
| 67    | 2216-33-3   | 3-Methyloctane                                             |                     |       |
| 67    | 2234-75-5   | 1,2,4-Trimethylcyclohexane                                 |                     |       |
| 67    | 2245-38-7   | 1,6,7-Trimethylnaphthalene                                 |                     |       |
| 67    | 2385-77-5   | (3R)-3,7-Dimethyloct-6-enal                                |                     |       |
| 67    | 24145-88-8  | (E)-1,4-Dimethyladamantane                                 |                     |       |
| 67    | 24145-89-9  | (Z)-1,4-Dimethyladamantane                                 |                     |       |
| 67    | 2453-00-1   | 1,3-Dimethylcyclopentane                                   |                     |       |
| 67    | 2471-83-2   | 1-Ethylidene-1H-indene                                     |                     |       |
| 67    | 2471-84-3   | 1-Methylene-1H-indene                                      |                     |       |
| 67    | 25117-24-2  | 4-Methyltetradecane                                        |                     |       |
| 67    | 25117-32-2  | 5-Methyltetradecane                                        |                     |       |
| 67    | 2531-84-2   | 2-Methylphenanthrene                                       |                     |       |
| 67    | 26730-12-1  | 4-Methyltridecane                                          |                     |       |
| 67    | 26730-14-3  | 7-Methyltridecane                                          |                     |       |
| 67    | 26761-40-0  | Diisodecyl phthalate                                       |                     |       |
| 67    | 27554-26-3  | Diisooctyl phthalate                                       |                     |       |
| 67    | 2815-57-8   | 1,2,3-Trimethylcyclopentane                                |                     |       |
| 67    | 2815-58-9   | 1,2,4-Trimethylcyclopentane                                |                     |       |
| 67    | 2847-72-5   | 4-Methyldecane                                             |                     |       |
| 67    | 2855-19-8   | 1,2-Epoxydodecane                                          |                     |       |
| 67    | 2885-00-9   | 1-Octadecanethiol                                          |                     |       |
| 67    | 295-02-3    | Cyclotridecane                                             |                     |       |
| 67    | 295-17-0    | Cyclotetradecane                                           |                     |       |
| 67    | 295-48-7    | Cyclopentadecane                                           |                     |       |
| 67    | 2958-76-1   | Decahydro-2-methylnaphthalene                              |                     |       |
| 67    | 297-35-8    | Cyclotriacontane                                           |                     |       |
| 67    | 2980-69-0   | 4-Methylundecane                                           |                     |       |
| 67    | 3073-66-3   | 1,1,3-Trimethylcyclohexane                                 |                     |       |
| 67    | 3074-71-3   | 2,3-Dimethylheptane                                        |                     |       |
| 67    | 31295-56-4  | 2,6,11-Trimethyldodecane                                   |                     |       |
| 67    | 3221-61-2   | 2-Methyloctane                                             |                     |       |
| 67    | 3386-33-2   | Octadecyl chloride                                         |                     |       |
| 67    | 3726-46-3   | 1-Ethyl-2-methylcyclopentane                               |                     |       |
| 67    | 3728-54-9   | 1-Ethyl-2-methylcyclohexane                                |                     |       |
| 67    | 3728-55-0   | 1-Ethyl-3-methylcyclohexane                                |                     |       |
| 67    | 3728-56-1   | 1-Ethyl-4-methylcyclohexane                                |                     |       |
| 67    | 38274-72-5  | (Z)-4-Ethyl-5-octyl-2,2-bis(trifluoromethyl)-1,3-dioxolane |                     |       |
| 67    | 3891-98-3   | 2,6,10-Trimethyldodecane                                   |                     |       |
| 67    | 3892-00-0   | 2,6,10-Trimethylpentadecane                                |                     |       |
| 67    | 40710-32-5  | Nonahexacontanoic acid                                     |                     |       |
| 67    | 4291-79-6   | 1-Methyl-2-propyl-cyclohexane                              |                     |       |
| 67    | 4292-75-5   | Hexylcyclohexane                                           |                     |       |
| 67    | 4292-92-6   | Pentylcyclohexane                                          |                     |       |
| 67    | 4306-65-4   | 1,1,3,5-Tetramethylcyclohexane                             |                     |       |
| 67    | 442662-72-8 | 2-Ethyl-1,1,3-trimethylcyclohexane                         |                     |       |
| 67    | 4453-90-1   | 1,4-Dihydro-1,4-methanonaphthalene                         |                     |       |
| 67    | 4461-48-7   | 4-Methyl-2-pentene                                         |                     |       |
| 67    | 51050-50-1  | 2-Methyl-7-octadecene                                      |                     |       |
| 67    | 513-35-9    | 2-Methyl-2-butene                                          |                     |       |
| 67    | 526-73-8    | 1,2,3-Trimethylbenzene                                     |                     |       |

SI Table 4a: 1198 chemicals reported as being detected in produced water, by reference

| Refid | CAS        | Name                                                | Conc (Max reported) | Units |
|-------|------------|-----------------------------------------------------|---------------------|-------|
| 67    | 53172-84-2 | (1-Methyl-1-buten-1-yl)benzene                      |                     |       |
| 67    | 541-91-3   | 3-Methylcyclopentadecan-1-one                       |                     |       |
| 67    | 54411-01-7 | 1-Methyl-2-pentylcyclohexane                        |                     |       |
| 67    | 544-76-3   | Hexadecane                                          |                     |       |
| 67    | 544-85-4   | Dotriacontane                                       |                     |       |
| 67    | 54833-23-7 | 10-Methylcosane                                     |                     |       |
| 67    | 55282-11-6 | 11-Pentan-3-ylheneicosane                           |                     |       |
| 67    | 55282-68-3 | 2'-Dodecyl- 1,1':3',1''-tercyclopentane             |                     |       |
| 67    | 55821-04-0 | syn-1,6:8,13-Bismethano[14]annulene                 |                     |       |
| 67    | 56009-20-2 | 1-(1,5-Dimethylhexyl)-4-(4-methylpentyl)cyclohexane |                     |       |
| 67    | 56221-91-1 | 13-Tetradecen-1-yl acetate                          |                     |       |
| 67    | 56292-65-0 | 2,5-Dimethyldodecane                                |                     |       |
| 67    | 563-46-2   | 2-Methylbut-1-ene                                   |                     |       |
| 67    | 571-58-4   | 1,4-Dimethylnaphthalene                             |                     |       |
| 67    | 571-61-9   | 1,5-Dimethylnaphthalene                             |                     |       |
| 67    | 575-43-9   | 1,6-Dimethylnaphthalene                             |                     |       |
| 67    | 581-40-8   | 2,3-Dimethylnaphthalene                             |                     |       |
| 67    | 581-42-0   | 2,6-Dimethylnaphthalene                             |                     |       |
| 67    | 582-16-1   | 2,7-Dimethylnaphthalene                             |                     |       |
| 67    | 589-43-5   | 2,4-Dimethylhexane                                  |                     |       |
| 67    | 589-53-7   | 4-Methylheptane                                     |                     |       |
| 67    | 589-90-2   | 1,4-Dimethylcyclohexane                             |                     |       |
| 67    | 590-66-9   | 1,1-Dimethylcyclohexane                             |                     |       |
| 67    | 591-21-9   | 1,3-Dimethylcyclohexane                             |                     |       |
| 67    | 592-27-8   | 2-Methylheptane                                     |                     |       |
| 67    | 593-45-3   | Octadecane                                          |                     |       |
| 67    | 593-49-7   | Heptacosane                                         |                     |       |
| 67    | 611-14-3   | 1-Ethyl-2-methylbenzene                             |                     |       |
| 67    | 61141-72-8 | 4,6-Dimethyldodecane                                |                     |       |
| 67    | 61142-52-7 | 1-Butyl-2-pentylcyclopentane                        |                     |       |
| 67    | 6165-40-8  | 7-Methylpentadecane                                 |                     |       |
| 67    | 619-99-8   | 3-Ethylhexane                                       |                     |       |
| 67    | 620-14-4   | 3-Ethyltoluene                                      |                     |       |
| 67    | 62016-79-9 | 1-Chloroheptacosane                                 |                     |       |
| 67    | 62199-51-3 | 1-Pentyl-2-propylcyclopentane                       |                     |       |
| 67    | 629-50-5   | Tridecane                                           |                     |       |
| 67    | 629-59-4   | Tetradecane                                         |                     |       |
| 67    | 629-62-9   | Pentadecane                                         |                     |       |
| 67    | 629-72-1   | 1-Bromopentadecane                                  |                     |       |
| 67    | 629-78-7   | Heptadecane                                         |                     |       |
| 67    | 629-92-5   | Nonadecane                                          |                     |       |
| 67    | 629-94-7   | Heneicosane                                         |                     |       |
| 67    | 629-97-0   | Docosane                                            |                     |       |
| 67    | 629-99-2   | Pentacosane                                         |                     |       |
| 67    | 630-01-3   | Hexacosane                                          |                     |       |
| 67    | 630-02-4   | Octacosane                                          |                     |       |
| 67    | 630-03-5   | Nonacosane                                          |                     |       |
| 67    | 630-06-8   | Hexatriacontane                                     |                     |       |
| 67    | 630-07-9   | Pentatriacontane                                    |                     |       |
| 67    | 638-36-8   | 2,6,10,14-Tetramethylhexadecane                     |                     |       |
| 67    | 638-67-5   | Tricosane                                           |                     |       |
| 67    | 638-68-6   | Triacotane                                          |                     |       |
| 67    | 64275-73-6 | (Z)-5-Octen-1-ol                                    |                     |       |
| 67    | 646-31-1   | Tetracosane                                         |                     |       |
| 67    | 66826-95-7 | 1-(Cyclohexylmethyl)-4-methylcyclohexane            |                     |       |
| 67    | 67-64-1    | Acetone                                             |                     |       |
| 67    | 6765-39-5  | 1-Heptadecene                                       |                     |       |
| 67    | 67-66-3    | Chloroform                                          |                     |       |
| 67    | 69586-09-0 | 2,2-Dichloro-3,6-dimethyl-2H-1,2-oxasiline          |                     |       |
| 67    | 6971-40-0  | 17-pentatriacontene                                 |                     |       |
| 67    | 6975-98-0  | 2-Methyldecane                                      |                     |       |
| 67    | 7045-71-8  | 2-Methylundecane                                    |                     |       |
| 67    | 7098-21-7  | Tritetracontane                                     |                     |       |
| 67    | 7098-22-8  | Tetratetracontane                                   |                     |       |
| 67    | 73105-67-6 | 1-Iodo-2-methylundecane                             |                     |       |
| 67    | 7320-37-8  | 1,2-Epoxyhexadecane                                 |                     |       |
| 67    | 74646-31-4 | 14-Bromo-1-tetradecene                              |                     |       |
| 67    | 75-09-2    | Dichloromethane                                     |                     |       |
| 67    | 75-34-3    | 1,1-Dichloroethane                                  |                     |       |
| 67    | 7773-83-3  | 1-Docosanethiol                                     |                     |       |
| 67    | 779-02-2   | 9-Methylantracene                                   |                     |       |
| 67    | 77-90-7    | Acetyl tributyl citrate                             |                     |       |

SI Table 4a: 1198 chemicals reported as being detected in produced water, by reference

| Refid | CAS         | Name                                             | Conc (Max reported) | Units |
|-------|-------------|--------------------------------------------------|---------------------|-------|
| 67    | 829-26-5    | 2,3,6-Trimethylnaphthalene                       |                     |       |
| 67    | 84-77-5     | Didecyl phthalate                                |                     |       |
| 67    | 852228-22-9 | 1,54-Dibromotetrapentacotane                     |                     |       |
| 67    | 866760-27-2 | (4Z)-2-Methyl-4-tetradecene                      |                     |       |
| 67    | 871-83-0    | 2-Methylnonane                                   |                     |       |
| 67    | 89-16-7     | Bis(8-methylnonyl) phthalate                     |                     |       |
| 67    | 89-18-9     | Butyl 8-methylnonyl phthalate                    |                     |       |
| 67    | 90-12-0     | 1-Methylnaphthalene                              |                     |       |
| 67    | 90548-09-7  | Decahydro-1-methyl-2-methylenenaphthalene        |                     |       |
| 67    | 912629-93-7 | (9E)-8-Methyl-9-tetradecen-1-yl acetate          |                     |       |
| 67    | 91-57-6     | 2-Methylnaphthalene                              |                     |       |
| 67    | 930-89-2    | (Z)-1-Ethyl-2-methylcyclopentane                 |                     |       |
| 67    | 933-98-2    | 1-Ethyl-2,3-dimethylbenzene                      |                     |       |
| 67    | 934-80-5    | 1,2-Dimethyl-4-ethylbenzene                      |                     |       |
| 67    | 938-06-7    | (4aS,8aR)-4a-Methyloctahydronaphthalen-2(1H)-one |                     |       |
| 67    | 949-41-7    | 1a,9b-Dihydro-1H-cyclopropa[1]phenanthrene       |                     |       |
| 67    | 95-47-6     | o-Xylene                                         |                     |       |
| 67    | 95-63-6     | 1,2,4-Trimethylbenzene                           |                     |       |
| 67    | 959103-74-3 | Undecyl heptafluorobutanoate                     |                     |       |
| 67    | 95-93-2     | 1,2,4,5-Tetramethylbenzene                       |                     |       |
| 67    | 99-87-6     | p-Cymene                                         |                     |       |
| 68    | 16984-48-8  | Fluoride                                         | 1100                | mg/L  |
| 68    | 7429-90-5   | Aluminum                                         | 137                 | mg/L  |
| 68    | 7439-89-6   | Iron                                             | 312                 | mg/L  |
| 68    | 7439-96-5   | Manganese                                        | 29                  | mg/L  |
| 68    | 7439-98-7   | Molybdenum                                       | 3.49                | mg/L  |
| 68    | 7440-38-2   | Arsenic                                          | 3.16                | mg/L  |
| 68    | 7440-39-3   | Barium                                           | 900                 | mg/L  |
| 68    | 7440-42-8   | Boron                                            | 90                  | mg/L  |
| 68    | 7440-47-3   | Chromium                                         | 83.9                | mg/L  |
| 68    | 7440-50-8   | Copper                                           | 24.2                | mg/L  |
| 68    | 7440-66-6   | Zinc                                             | 26.9                | mg/L  |
| 68    | 7782-49-2   | Selenium                                         | 1.34                | mg/L  |
| 69    | 7440-09-7   | Potassium                                        | 294                 | mg/L  |
| 69    | 14127-61-8  | Calcium ion                                      | 9994                | mg/L  |
| 69    | 14797-55-8  | Nitrate                                          | 18.1                | mg/L  |
| 69    | 14808-79-8  | Sulfate                                          | 31.7                | mg/L  |
| 69    | 16887-00-6  | Chloride                                         | 91800               | mg/L  |
| 69    | 17341-25-2  | Sodium ion                                       | 44770               | mg/L  |
| 69    | 24959-67-9  | Bromide                                          | 876                 | mg/L  |
| 69    | 7439-89-6   | Iron                                             | 109                 | mg/L  |
| 69    | 7439-95-4   | Magnesium                                        | 1255                | mg/L  |
| 69    | 7440-24-6   | Strontium                                        | 2687                | mg/L  |
| 69    | 7440-39-3   | Barium                                           | 3169                | mg/L  |
| 69    | 7704-34-9   | Sulfur                                           | 56.8                | mg/L  |
| 70    | 7440-09-7   | Potassium                                        | 261                 | mg/L  |
| 70    | 14808-79-8  | Sulfate                                          | 25.7                | mg/L  |
| 70    | 16887-00-6  | Chloride                                         | 51000               | mg/L  |
| 70    | 17341-25-2  | Sodium ion                                       | 20910               | mg/L  |
| 70    | 24959-67-9  | Bromide                                          | 552                 | mg/L  |
| 70    | 71-50-1     | Acetate                                          | 75.9                | mg/L  |
| 70    | 7439-89-6   | Iron                                             | 64.9                | mg/L  |
| 70    | 7440-24-6   | Strontium                                        | 1296                | mg/L  |
| 70    | 7440-39-3   | Barium                                           | 418                 | mg/L  |
| 70    | 7440-70-2   | Calcium                                          | 8818                | mg/L  |
| 70    | 7553-56-2   | Iodine                                           | 10.3                | mg/L  |
| 71    | 7440-09-7   | Potassium                                        | 53                  | mg/L  |
| 71    | 14797-55-8  | Nitrate                                          | 7                   | mg/L  |
| 71    | 14808-79-8  | Sulfate                                          | 60                  | mg/L  |
| 71    | 16887-00-6  | Chloride                                         | 3361                | mg/L  |
| 71    | 71-52-3     | Bicarbonate                                      | 528                 | mg/L  |
| 71    | 7439-89-6   | Iron                                             | 0.39                | mg/L  |
| 71    | 7439-95-4   | Magnesium                                        | 9.1                 | mg/L  |
| 71    | 7439-96-5   | Manganese                                        | 0.26                | mg/L  |
| 71    | 7440-23-5   | Sodium                                           | 2252                | mg/L  |
| 71    | 7440-42-8   | Boron                                            | 28                  | mg/L  |
| 71    | 7440-70-2   | Calcium                                          | 56                  | mg/L  |
| 72    | 13233-32-4  | Radium-224                                       | 567.5675676         | pCi/L |
| 72    | 13966-00-2  | Potassium-40                                     | 270.2702703         | pCi/L |
| 72    | 13966-29-5  | Uranium 234                                      | 0.06972973          | pCi/L |
| 72    | 13981-52-7  | Polonium-210                                     | 111.6216216         | pCi/L |
| 72    | 14274-82-9  | Thorium 228                                      | 595.1351351         | pCi/L |

SI Table 4a: 1198 chemicals reported as being detected in produced water, by reference

| Refid | CAS        | Name                             | Conc (Max reported) | Units |
|-------|------------|----------------------------------|---------------------|-------|
| 72    | 14331-83-0 | Actinium-228                     | 2054.054054         | pCi/L |
| 72    | 14733-03-0 | Bismuth-214                      | 6351.351351         | pCi/L |
| 72    | 15067-28-4 | Lead-214                         | 6918.918919         | pCi/L |
| 72    | 15092-94-1 | Lead-212                         | 64.86486486         | pCi/L |
| 72    | 15117-96-1 | Uranium-235                      | 0.003783784         | pCi/L |
| 72    | 7440-61-1  | Uranium                          | 0.030540541         | pCi/L |
| 73    | 7440-09-7  | Potassium                        | 160                 | mg/L  |
| 73    | 13982-63-3 | Radium-226                       | 16486.48649         | pCi/L |
| 73    | 14265-44-2 | Phosphate                        | 8                   | mg/L  |
| 73    | 16887-00-6 | Chloride                         | 147000              | mg/L  |
| 73    | 24959-67-9 | Bromide                          | 1300                | mg/L  |
| 73    | 471-34-1   | Carbonic acid calcium salt (1:1) | 10                  | mg/L  |
| 73    | 68334-30-5 | Fuels, diesel                    | 1.3                 | mg/L  |
| 73    | 7439-89-6  | Iron                             | 43                  | mg/L  |
| 73    | 7439-92-1  | Lead                             | 1                   | mg/L  |
| 73    | 7439-95-4  | Magnesium                        | 850                 | mg/L  |
| 73    | 7439-96-5  | Manganese                        | 3.4                 | mg/L  |
| 73    | 7440-21-3  | Silicon                          | 3.7                 | mg/L  |
| 73    | 7440-23-5  | Sodium                           | 29000               | mg/L  |
| 73    | 7440-24-6  | Strontium                        | 36000               | mg/L  |
| 73    | 7440-38-2  | Arsenic                          | 0.81                | mg/L  |
| 73    | 7440-39-3  | Barium                           | 9000                | mg/L  |
| 73    | 7440-70-2  | Calcium                          | 13000               | mg/L  |
| 73    | 8008-20-6  | Kerosine                         | 0.2                 | mg/L  |
| 73    | 86290-81-5 | Gasoline                         | 0.8                 | mg/L  |
| 74    | 7440-09-7  | Potassium                        |                     |       |
| 74    | 100-41-4   | Ethylbenzene                     |                     |       |
| 74    | 10045-97-3 | Caesium-137                      |                     |       |
| 74    | 100-51-6   | Benzyl alcohol                   |                     |       |
| 74    | 1024-57-3  | Heptachlor epoxide               |                     |       |
| 74    | 105-67-9   | 2,4-Dimethylphenol               |                     |       |
| 74    | 106-44-5   | p-Cresol                         |                     |       |
| 74    | 107-13-1   | Acrylonitrile                    |                     |       |
| 74    | 107-21-1   | Ethylene glycol                  |                     |       |
| 74    | 108-39-4   | m-Cresol                         |                     |       |
| 74    | 108-67-8   | 1,3,5-Trimethylbenzene           |                     |       |
| 74    | 108-88-3   | Toluene                          |                     |       |
| 74    | 108-95-2   | Phenol                           |                     |       |
| 74    | 109-06-8   | 2-Methylpyridine                 |                     |       |
| 74    | 110-86-1   | Pyridine                         |                     |       |
| 74    | 111-44-4   | Bis(2-chloroethyl) ether         |                     |       |
| 74    | 117-81-7   | Di(2-ethylhexyl) phthalate       |                     |       |
| 74    | 122-39-4   | Diphenylamine                    |                     |       |
| 74    | 124-38-9   | Carbon dioxide                   |                     |       |
| 74    | 124-48-1   | Chlorodibromomethane             |                     |       |
| 74    | 12672-29-6 | Aroclor 1248                     |                     |       |
| 74    | 127-18-4   | Tetrachloroethylene              |                     |       |
| 74    | 1330-20-7  | Xylenes                          |                     |       |
| 74    | 13982-63-3 | Radium-226                       |                     |       |
| 74    | 14265-45-3 | Sulfite                          |                     |       |
| 74    | 14797-55-8 | Nitrate                          |                     |       |
| 74    | 14797-65-0 | Nitrite                          |                     |       |
| 74    | 14808-79-8 | Sulfate                          |                     |       |
| 74    | 15262-20-1 | Radium-228                       |                     |       |
| 74    | 16065-83-1 | Chromium (III)                   |                     |       |
| 74    | 16887-00-6 | Chloride                         |                     |       |
| 74    | 16984-48-8 | Fluoride                         |                     |       |
| 74    | 18540-29-9 | Chromium (VI) ion                |                     |       |
| 74    | 191-24-2   | Benzo(g,h,i)perylene             |                     |       |
| 74    | 193-39-5   | Indeno(1,2,3-cd)pyrene           |                     |       |
| 74    | 205-99-2   | Benzo(b)fluoranthene             |                     |       |
| 74    | 206-44-0   | Fluoranthene                     |                     |       |
| 74    | 207-08-9   | Benzo(k)fluoranthene             |                     |       |
| 74    | 24959-67-9 | Bromide                          |                     |       |
| 74    | 309-00-2   | Aldrin                           |                     |       |
| 74    | 319-85-7   | beta-Hexachlorocyclohexane       |                     |       |
| 74    | 33213-65-9 | Endosulfan II                    |                     |       |
| 74    | 50-32-8    | Benzo(a)pyrene                   |                     |       |
| 74    | 53-70-3    | Dibenz(a,h)anthracene            |                     |       |
| 74    | 57-12-5    | Cyanide                          |                     |       |
| 74    | 57-55-6    | 1,2-Propylene glycol             |                     |       |
| 74    | 57-97-6    | 7,12-Dimethylbenz(a)anthracene   |                     |       |



SI Table 4a: 1198 chemicals reported as being detected in produced water, by reference

| Refid | CAS        | Name                          | Conc (Max reported) | Units |
|-------|------------|-------------------------------|---------------------|-------|
| 74    | 58-89-9    | Lindane                       |                     |       |
| 74    | 64-19-7    | Acetic acid                   |                     |       |
| 74    | 67-56-1    | Methanol                      |                     |       |
| 74    | 67-63-0    | Isopropanol                   |                     |       |
| 74    | 67-64-1    | Acetone                       |                     |       |
| 74    | 67-66-3    | Chloroform                    |                     |       |
| 74    | 71-43-2    | Benzene                       |                     |       |
| 74    | 72-55-9    | p,p'-DDE                      |                     |       |
| 74    | 7421-93-4  | Endrin aldehyde               |                     |       |
| 74    | 7429-90-5  | Aluminum                      |                     |       |
| 74    | 7439-89-6  | Iron                          |                     |       |
| 74    | 7439-92-1  | Lead                          |                     |       |
| 74    | 7439-93-2  | Lithium                       |                     |       |
| 74    | 7439-95-4  | Magnesium                     |                     |       |
| 74    | 7439-96-5  | Manganese                     |                     |       |
| 74    | 7439-97-6  | Mercury                       |                     |       |
| 74    | 7439-98-7  | Molybdenum                    |                     |       |
| 74    | 7440-02-0  | Nickel                        |                     |       |
| 74    | 7440-14-4  | Radium                        |                     |       |
| 74    | 7440-22-4  | Silver                        |                     |       |
| 74    | 7440-23-5  | Sodium                        |                     |       |
| 74    | 7440-24-6  | Strontium                     |                     |       |
| 74    | 7440-28-0  | Thallium                      |                     |       |
| 74    | 7440-32-6  | Titanium                      |                     |       |
| 74    | 7440-36-0  | Antimony                      |                     |       |
| 74    | 7440-38-2  | Arsenic                       |                     |       |
| 74    | 7440-39-3  | Barium                        |                     |       |
| 74    | 7440-41-7  | Beryllium                     |                     |       |
| 74    | 7440-42-8  | Boron                         |                     |       |
| 74    | 7440-43-9  | Cadmium                       |                     |       |
| 74    | 7440-47-3  | Chromium                      |                     |       |
| 74    | 7440-48-4  | Cobalt                        |                     |       |
| 74    | 7440-50-8  | Copper                        |                     |       |
| 74    | 7440-62-2  | Vanadium                      |                     |       |
| 74    | 7440-66-6  | Zinc                          |                     |       |
| 74    | 7440-67-7  | Zirconium                     |                     |       |
| 74    | 7440-70-2  | Calcium                       |                     |       |
| 74    | 74-83-9    | Methyl bromide                |                     |       |
| 74    | 74-87-3    | Chloromethane                 |                     |       |
| 74    | 75-15-0    | Carbon disulfide              |                     |       |
| 74    | 75-25-2    | Bromoform                     |                     |       |
| 74    | 75-27-4    | Bromodichloromethane          |                     |       |
| 74    | 76-44-8    | Heptachlor                    |                     |       |
| 74    | 7664-41-7  | Ammonia                       |                     |       |
| 74    | 7723-14-0  | Phosphorus                    |                     |       |
| 74    | 7782-49-2  | Selenium                      |                     |       |
| 74    | 78-93-3    | Methyl ethyl ketone           |                     |       |
| 74    | 84-74-2    | Dibutyl phthalate             |                     |       |
| 74    | 85-01-8    | Phenanthrene                  |                     |       |
| 74    | 86-30-6    | N-Nitrosodiphenylamine        |                     |       |
| 74    | 86-73-7    | Fluorene                      |                     |       |
| 74    | 87-61-6    | 1,2,3-Trichlorobenzene        |                     |       |
| 74    | 87-65-0    | 2,6-Dichlorophenol            |                     |       |
| 74    | 91-20-3    | Naphthalene                   |                     |       |
| 74    | 91-57-6    | 2-Methylnaphthalene           |                     |       |
| 74    | 94-59-7    | Safrole                       |                     |       |
| 74    | 95-48-7    | o-Cresol                      |                     |       |
| 74    | 95-63-6    | 1,2,4-Trimethylbenzene        |                     |       |
| 74    | 959-98-8   | Endosulfan I                  |                     |       |
| 74    | 98-82-8    | Cumene                        |                     |       |
| 74    | 98-86-2    | Acetophenone                  |                     |       |
| 75    | 7440-09-7  | Potassium                     | 430                 | mg/L  |
| 75    | 14127-61-8 | Calcium ion                   |                     |       |
| 75    | 14808-79-8 | Sulfate                       |                     |       |
| 75    | 15438-31-0 | Fe +2 ion                     | 22                  | mg/L  |
| 75    | 16887-00-6 | Chloride                      |                     |       |
| 75    | 17341-25-2 | Sodium ion                    |                     |       |
| 75    | 24959-67-9 | Bromide                       |                     |       |
| 75    | 25322-68-3 | Polyethylene glycol           | 16                  | mg/L  |
| 75    | 68213-23-0 | Alcohols, C12-18, ethoxylated | 0.3                 | mg/L  |
| 75    | 7439-95-4  | Magnesium                     |                     |       |
| 75    | 7553-56-2  | Iodine                        | 40.8                | mg/L  |

SI Table 4a: 1198 chemicals reported as being detected in produced water, by reference

| Refid | CAS          | Name                                                         | Conc (Max reported) | Units  |
|-------|--------------|--------------------------------------------------------------|---------------------|--------|
| 75    | 8001-54-5    | Benzalkonium chloride                                        |                     | 1 mg/L |
| 76    | 10396-80-2   | 2,6-Di-tert-butyl-4-hydroxy-4-methyl-2,5-cyclohexadien-1-one |                     |        |
| 76    | 105-60-2     | Caprolactam                                                  |                     |        |
| 76    | 107-21-1     | Ethylene glycol                                              |                     |        |
| 76    | 107997-59-1  | 1,2,3-Trimethyl-4-(3-methylbutyl)benzene                     |                     |        |
| 76    | 112-34-5     | 2-(2-Butoxyethoxy)ethanol                                    |                     |        |
| 76    | 115-86-6     | Triphenyl phosphate                                          |                     |        |
| 76    | 117-81-7     | Di(2-ethylhexyl) phthalate                                   |                     |        |
| 76    | 117-84-0     | Di-n-octyl phthalate                                         |                     |        |
| 76    | 119-61-9     | Benzophenone                                                 |                     |        |
| 76    | 119-64-2     | Tetralin                                                     |                     |        |
| 76    | 119-65-3     | Isoquinoline                                                 |                     |        |
| 76    | 122-39-4     | Diphenylamine                                                |                     |        |
| 76    | 129-00-0     | Pyrene                                                       |                     |        |
| 76    | 1300-71-6    | Dimethylphenol                                               |                     |        |
| 76    | 1321-94-4    | Methylnaphthalene                                            |                     |        |
| 76    | 132-65-0     | Dibenzothiophene                                             |                     |        |
| 76    | 134-62-3     | DEET                                                         |                     |        |
| 76    | 140-66-9     | 4-(1,1,3,3-Tetramethylbutyl)phenol                           |                     |        |
| 76    | 143-07-7     | Dodecanoic acid                                              |                     |        |
| 76    | 144-19-4     | 2,2,4-Trimethyl-1,3-pentanediol                              |                     |        |
| 76    | 1483-60-9    | 2,4-Dimethyl-1-(1-methylpropyl)benzene                       |                     |        |
| 76    | 198-55-0     | Perylene                                                     |                     |        |
| 76    | 2315-61-9    | 2-[2-[4-(1,1,3,3-Tetramethylbutyl)phenoxy]ethoxy]ethanol     |                     |        |
| 76    | 243-38-9     | 5H-Quinindoline                                              |                     |        |
| 76    | 25167-82-2   | Trichlorophenol                                              |                     |        |
| 76    | 25551-13-7   | Trimethylbenzene                                             |                     |        |
| 76    | 26603-23-6   | Bis(octylphenyl)amine                                        |                     |        |
| 76    | 26746-38-3   | 2,3-di-tert-butylphenol                                      |                     |        |
| 76    | 272-16-2     | 1,2-Benzisothiazole                                          |                     |        |
| 76    | 28652-72-4   | Methyl-1,1'-biphenyl                                         |                     |        |
| 76    | 28804-88-8   | Dimethylnaphthalene                                          |                     |        |
| 76    | 3055-93-4    | 2-[2-(Dodecyloxy)ethoxy]ethanol                              |                     |        |
| 76    | 3055-94-5    | Triethylene glycol monododecyl ether                         |                     |        |
| 76    | 3333-52-6    | Tetramethylsuccinonitrile                                    |                     |        |
| 76    | 4013-34-7    | (1-Methoxyethyl)benzene                                      |                     |        |
| 76    | 4466-77-7    | 1,2,3,4-Tetramethylphenanthrene                              |                     |        |
| 76    | 483-65-8     | Retene                                                       |                     |        |
| 76    | 544-63-8     | Tetradecanoic acid                                           |                     |        |
| 76    | 54827-17-7   | 3,3',5,5'-Tetramethylbenzidine                               |                     |        |
| 76    | 562-28-7     | (-)-Kaur-16-ene                                              |                     |        |
| 76    | 57-10-3      | Hexadecanoic acid                                            |                     |        |
| 76    | 57-11-4      | Octadecanoic acid                                            |                     |        |
| 76    | 629-62-9     | Pentadecane                                                  |                     |        |
| 76    | 629-99-2     | Pentacosane                                                  |                     |        |
| 76    | 6971-52-4    | 3-Methoxy-2-methylphenol                                     |                     |        |
| 76    | 80-05-7      | Bisphenol A                                                  |                     |        |
| 76    | 80061-31-0   | 3,4-Dihydro-1,9(2H,10H)-acridinedione                        |                     |        |
| 76    | 84-66-2      | Diethyl phthalate                                            |                     |        |
| 76    | 84-74-2      | Dibutyl phthalate                                            |                     |        |
| 76    | 84-77-5      | Didecyl phthalate                                            |                     |        |
| 76    | 85-68-7      | Benzyl butyl phthalate                                       |                     |        |
| 76    | 874-41-9     | 1,3-Dimethyl-4-ethylbenzene                                  |                     |        |
| 76    | 88-18-6      | 2-tert-Butylphenol                                           |                     |        |
| 76    | 90-12-0      | 1-Methylnaphthalene                                          |                     |        |
| 76    | 91-20-3      | Naphthalene                                                  |                     |        |
| 76    | 91-22-5      | Quinoline                                                    |                     |        |
| 76    | 91-57-6      | 2-Methylnaphthalene                                          |                     |        |
| 76    | 92-52-4      | Biphenyl                                                     |                     |        |
| 76    | 934-34-9     | Benzothiazolone                                              |                     |        |
| 76    | 95-16-9      | Benzothiazole                                                |                     |        |
| 76    | 96-76-4      | 2,4-Di-tert-butylphenol                                      |                     |        |
| 76    | 98-54-4      | 4-tert-Butylphenol                                           |                     |        |
| 76    | 98-86-2      | Acetophenone                                                 |                     |        |
| 76    | NOCAS_891518 | Nonylphenols                                                 |                     |        |
| 77    | 1002-84-2    | Pentadecanoic acid                                           | 0.00084             | mg/L   |
| 77    | 100-51-6     | Benzyl alcohol                                               | 0.00033             | mg/L   |
| 77    | 1016165-79-9 | 1,2-Di-but-2-enyl-cyclohexane                                | 0.00077             | mg/L   |
| 77    | 101-81-5     | Diphenylmethane                                              | 0.00043             | mg/L   |
| 77    | 106-51-4     | 1,4-Benzoquinone                                             | 0.00008             | mg/L   |
| 77    | 1079-71-6    | 1,2,3,4,5,6,7,8-Octahydroanthracene                          | 0.00054             | mg/L   |
| 77    | 108837-05-4  | 4-Propyl-9H-xanthen-9-one                                    | 0.00007             | mg/L   |

SI Table 4a: 1198 chemicals reported as being detected in produced water, by reference

| Refid | CAS         | Name                                                            | Conc (Max reported) | Units |
|-------|-------------|-----------------------------------------------------------------|---------------------|-------|
| 77    | 109-21-7    | Butyl butyrate                                                  | 0.00044             | mg/L  |
| 77    | 110-27-0    | Isopropyl tetradecanoic acid                                    | 0.00179             | mg/L  |
| 77    | 112-34-5    | 2-(2-Butoxyethoxy)ethanol                                       | 0.00045             | mg/L  |
| 77    | 115-86-6    | Triphenyl phosphate                                             | 0.00021             | mg/L  |
| 77    | 117-84-0    | Di-n-octyl phthalate                                            | 0.00463             | mg/L  |
| 77    | 119296-91-2 | Methyl (4Z)-3,3-diphenylhex-4-enoate                            | 0.002               | mg/L  |
| 77    | 119-64-2    | Tetralin                                                        | 0.00082             | mg/L  |
| 77    | 1203-17-4   | 2,3-Dihydro-1,1,2,3,3-pentamethyl-1H-indene                     | 0.00045             | mg/L  |
| 77    | 1205-39-6   | 2-Methyl-N-phenylaniline                                        | 0.00353             | mg/L  |
| 77    | 121-33-5    | 4-Hydroxy-3-methoxybenzaldehyde                                 | 0.00431             | mg/L  |
| 77    | 122-39-4    | Diphenylamine                                                   | 0.00373             | mg/L  |
| 77    | 123731-75-9 | 1-Allyl-3-methylindole-2-carbaldehyde                           | 0.00149             | mg/L  |
| 77    | 1241-94-7   | 2-Ethylhexyl diphenyl phosphate                                 | 0.00075             | mg/L  |
| 77    | 126-73-8    | Tributyl phosphate                                              | 0.01896             | mg/L  |
| 77    | 129-00-0    | Pyrene                                                          | 0.00004             | mg/L  |
| 77    | 1300-71-6   | Dimethylphenol                                                  | 0.00138             | mg/L  |
| 77    | 131-11-3    | Dimethyl phthalate                                              | 0.00028             | mg/L  |
| 77    | 1321-94-4   | Methylnaphthalene                                               | 0.00048             | mg/L  |
| 77    | 136-83-4    | 2-Nonylphenol                                                   | 0.00791             | mg/L  |
| 77    | 143-07-7    | Dodecanoic acid                                                 | 0.0017              | mg/L  |
| 77    | 1450-72-2   | 1-(2-Hydroxy-5-methylphenyl)ethanone                            | 0.00029             | mg/L  |
| 77    | 149-30-4    | 2-Mercaptobenzothiazole                                         | 0.00089             | mg/L  |
| 77    | 15123-40-7  | Pyreno[4,5-c]furan                                              | 0.00183             | mg/L  |
| 77    | 1559-81-5   | 1-Methyltetraline                                               | 0.00069             | mg/L  |
| 77    | 1599-67-3   | 1-Docosene                                                      | 0.00233             | mg/L  |
| 77    | 160951-15-5 | 4,6,8-Trimethyl-2-propylazulene                                 | 0.0004              | mg/L  |
| 77    | 1620-98-0   | 3,5-Di-tert-butyl-4-hydroxybenzaldehyde                         | 0.00042             | mg/L  |
| 77    | 1689-64-1   | Fluoren-9-ol                                                    | 0.00032             | mg/L  |
| 77    | 1730-37-6   | 1-Methylfluorene                                                | 0.00051             | mg/L  |
| 77    | 18435-45-5  | 1-Nonadecene                                                    | 0.00215             | mg/L  |
| 77    | 18835-33-1  | 1-Hexacosene                                                    | 0.00204             | mg/L  |
| 77    | 19781-86-3  | 8-Hexadecyne                                                    | 0.00028             | mg/L  |
| 77    | 20291-73-0  | Dimethylphenanthrene                                            | 0.00149             | mg/L  |
| 77    | 204781-73-7 | 28-Nor-17alpha(H)-hopane                                        | 0.00126             | mg/L  |
| 77    | 2103-57-3   | 2,3,4-Trimethoxybenzaldehyde                                    | 0.00039             | mg/L  |
| 77    | 228729-94-0 | 8,13-Dimethyl-14-(3-methylbutyl)podocarpene                     | 0.00175             | mg/L  |
| 77    | 2315-61-9   | 2-[2-[4-(1,1,3,3-Tetramethylbutyl)phenoxy]ethoxy]ethanol        | 0.00134             | mg/L  |
| 77    | 2381-21-7   | 1-Methylpyrene                                                  | 0.00002             | mg/L  |
| 77    | 2440-22-4   | 2-(2H-Benzotriazol-2-yl)-4-methylphenol                         | 0.00091             | mg/L  |
| 77    | 24624-29-1  | 1-Ethyl-9,10-anthraquinone                                      | 0.00012             | mg/L  |
| 77    | 25167-94-6  | Diphenylpropane                                                 | 0.00022             | mg/L  |
| 77    | 25377-73-5  | 3-(Dodecenyldihydro-2,5-furandione                              | 0.00116             | mg/L  |
| 77    | 26603-23-6  | Bis(octylphenyl)amine                                           | 0.00019             | mg/L  |
| 77    | 27519-02-4  | (Z)-9-Tricosene                                                 | 0.00098             | mg/L  |
| 77    | 27530-79-6  | Simonellite                                                     | 0.00068             | mg/L  |
| 77    | 276890-11-0 | 5-(1,1-Dimethylethyl)-1H-indene                                 | 0.0001              | mg/L  |
| 77    | 27875-89-4  | 1-Phenanthrenecarboxylic acid                                   | 0.00012             | mg/L  |
| 77    | 28652-72-4  | Methyl-1,1'-biphenyl                                            | 0.001               | mg/L  |
| 77    | 28804-88-8  | Dimethylnaphthalene                                             | 0.00144             | mg/L  |
| 77    | 28981-49-9  | Ethylcyclododecane                                              | 0.00154             | mg/L  |
| 77    | 297-35-8    | Cyclotriacontane                                                | 0.00108             | mg/L  |
| 77    | 30232-26-9  | Trimethylphenanthrene                                           | 0.00012             | mg/L  |
| 77    | 309735-29-3 | 1,2-Benzisothiazole, 3-(hexahydro-1H-azepin-1-yl)-, 1,1-dioxide | 0.00066             | mg/L  |
| 77    | 3386-33-2   | Octadecyl chloride                                              | 0.00212             | mg/L  |
| 77    | 35216-11-6  | 7-Tetradecyne                                                   | 0.00038             | mg/L  |
| 77    | 3891-98-3   | 2,6,10-Trimethyldodecane                                        | 0.00096             | mg/L  |
| 77    | 4466-77-7   | 1,2,3,4-Tetramethylphenanthrene                                 | 0.00068             | mg/L  |
| 77    | 48134-26-5  | 2,4,6-Trimethylazulene                                          | 0.00049             | mg/L  |
| 77    | 483-65-8    | Retene                                                          | 0.00319             | mg/L  |
| 77    | 483-78-3    | Cadalene                                                        | 0.00032             | mg/L  |
| 77    | 4957-14-6   | 1-Methyl-4-[(4-methylphenyl)methyl]benzene                      | 0.00011             | mg/L  |
| 77    | 50-24-8     | Prednisolone                                                    | 0.00051             | mg/L  |
| 77    | 52845-07-5  | Isoeicosane                                                     | 0.00258             | mg/L  |
| 77    | 5337-61-1   | 2-Octadecyl-1,3-propanediol                                     | 0.00042             | mg/L  |
| 77    | 544-63-8    | Tetradecanoic acid                                              | 0.00054             | mg/L  |
| 77    | 5466-77-3   | Octinoxate                                                      | 0.00278             | mg/L  |
| 77    | 55045-07-3  | 2-Methyl-8-propyldodecane                                       | 0.00052             | mg/L  |
| 77    | 562-28-7    | (-)-Kaur-16-ene                                                 | 0.00136             | mg/L  |
| 77    | 57-10-3     | Hexadecanoic acid                                               | 0.00256             | mg/L  |
| 77    | 57-88-5     | Cholesterol                                                     | 0.00026             | mg/L  |
| 77    | 58-08-2     | Caffeine                                                        | 0.0005              | mg/L  |
| 77    | 593-49-7    | Heptacosane                                                     | 0.00095             | mg/L  |

SI Table 4a: 1198 chemicals reported as being detected in produced water, by reference

| Refid | CAS          | Name                                                     | Conc (Max reported) | Units |
|-------|--------------|----------------------------------------------------------|---------------------|-------|
| 77    | 599-64-4     | 4-Cumylphenol                                            | 0.00118             | mg/L  |
| 77    | 610-48-0     | 1-Methylantracene                                        | 0.00048             | mg/L  |
| 77    | 615-22-5     | 2-(Methylthio)benzothiazole                              | 0.00054             | mg/L  |
| 77    | 61819-81-6   | 2,3',5-Trimethyldiphenylmethane                          | 0.00005             | mg/L  |
| 77    | 62583-58-8   | 1-Butyl-2-ethyloctahydro-1H-4,7-epoxyinden-5-ol          | 0.0009              | mg/L  |
| 77    | 629-59-4     | Tetradecane                                              | 0.00054             | mg/L  |
| 77    | 629-97-0     | Docosane                                                 | 0.00194             | mg/L  |
| 77    | 629-99-2     | Pentacosane                                              | 0.00154             | mg/L  |
| 77    | 630-01-3     | Hexacosane                                               | 0.00173             | mg/L  |
| 77    | 63521-76-6   | Tridecanedial                                            | 0.00086             | mg/L  |
| 77    | 638-36-8     | 2,6,10,14-Tetramethylhexadecane                          | 0.00165             | mg/L  |
| 77    | 638-67-5     | Tricosane                                                | 0.0017              | mg/L  |
| 77    | 646-31-1     | Tetracosane                                              | 0.00186             | mg/L  |
| 77    | 65119-95-1   | 22-Tricosenoic acid                                      | 0.00043             | mg/L  |
| 77    | 68593-94-2   | 2-Ethenylphenanthrene                                    | 0.00022             | mg/L  |
| 77    | 6971-40-0    | 17-pentatriacontene                                      | 0.001               | mg/L  |
| 77    | 719-22-2     | 2,6-Bis-(1,1-dimethylethyl)-2,5-cyclohexadiene-1,4-dione | 0.00028             | mg/L  |
| 77    | 73493-71-7   | 9-Methoxy-9H-fluorene                                    | 0.00018             | mg/L  |
| 77    | 74646-38-1   | 4,4-Dimethyltetracyclo[5.2.1.02,6.03,5]decane            | 0.00027             | mg/L  |
| 77    | 7683-64-9    | Squalene                                                 | 0.00024             | mg/L  |
| 77    | 790-82-9     | 4,4'-Diacetyldiphenylmethane                             | 0.00037             | mg/L  |
| 77    | 80-05-7      | Bisphenol A                                              | 0.01617             | mg/L  |
| 77    | 80061-31-0   | 3,4-Dihydro-1,9(2H,10H)-acridinedione                    | 0.00135             | mg/L  |
| 77    | 830-09-1     | 4-Methoxycinnamic acid                                   | 0.00016             | mg/L  |
| 77    | 84-66-2      | Diethyl phthalate                                        | 0.0149              | mg/L  |
| 77    | 84-74-2      | Dibutyl phthalate                                        | 0.00127             | mg/L  |
| 77    | 84-77-5      | Didecyl phthalate                                        | 0.00723             | mg/L  |
| 77    | 85-01-8      | Phenanthrene                                             | 0.00052             | mg/L  |
| 77    | 85-68-7      | Benzyl butyl phthalate                                   | 0.00033             | mg/L  |
| 77    | 86-73-7      | Fluorene                                                 | 0.00024             | mg/L  |
| 77    | 879-12-9     | 1,2,3-Trimethylnaphthalene                               | 0.0026              | mg/L  |
| 77    | 91-20-3      | Naphthalene                                              | 0.00066             | mg/L  |
| 77    | 92513-28-5   | 3-Methylquinoline-2-carboxylic acid                      | 0.00665             | mg/L  |
| 77    | 92-52-4      | Biphenyl                                                 | 0.0003              | mg/L  |
| 77    | 934-34-9     | Benzothiazolone                                          | 0.0039              | mg/L  |
| 77    | 93927-20-9   | 1-Ethyl-2-methylnaphthalene                              | 0.00055             | mg/L  |
| 77    | 941228-34-8  | 7-(Bromomethyl)pentadec-7-ene                            | 0.00277             | mg/L  |
| 77    | 95-16-9      | Benzothiazole                                            | 0.01427             | mg/L  |
| 77    | 98-54-4      | 4-tert-Butylphenol                                       | 0.00019             | mg/L  |
| 77    | NOCAS_873040 | Tricyclo[4.4.0.0(3,9)]decane                             | 0.00026             | mg/L  |
| 77    | NOCAS_873049 | Tetrahydrophenanthrene                                   | 0.00042             | mg/L  |
| 77    | NOCAS_873051 | Ethyltetrahydronaphthalene                               | 0.00046             | mg/L  |
| 78    | 14127-61-8   | Calcium ion                                              | 7890                | mg/L  |
| 78    | 16887-00-6   | Chloride                                                 | 127249              | mg/L  |
| 78    | 17341-25-2   | Sodium ion                                               | 63686               | mg/L  |
| 78    | 71-52-3      | Bicarbonate                                              | 228                 | mg/L  |
| 79    | 12587-46-1   | Alpha particle                                           |                     |       |
| 79    | 12587-47-2   | Beta particle                                            |                     |       |
| 79    | 13982-63-3   | Radium-226                                               |                     |       |
| 79    | 15262-20-1   | Radium-228                                               |                     |       |
| 80    | 7440-09-7    | Potassium                                                | 1784                | mg/L  |
| 80    | 7429-90-5    | Aluminum                                                 | 11.32               | mg/L  |
| 80    | 7439-89-6    | Iron                                                     | 248.6               | mg/L  |
| 80    | 7439-93-2    | Lithium                                                  | 168.4               | mg/L  |
| 80    | 7439-95-4    | Magnesium                                                | 2058                | mg/L  |
| 80    | 7439-96-5    | Manganese                                                | 12.43               | mg/L  |
| 80    | 7440-21-3    | Silicon                                                  | 11.47               | mg/L  |
| 80    | 7440-23-5    | Sodium                                                   | 54350               | mg/L  |
| 80    | 7440-24-6    | Strontium                                                | 7442                | mg/L  |
| 80    | 7440-39-3    | Barium                                                   | 2927                | mg/L  |
| 80    | 7440-42-8    | Boron                                                    | 28.66               | mg/L  |
| 80    | 7440-50-8    | Copper                                                   | 1.215               | mg/L  |
| 80    | 7440-66-6    | Zinc                                                     | 1.143               | mg/L  |
| 80    | 7440-70-2    | Calcium                                                  | 29490               | mg/L  |
| 80    | 7704-34-9    | Sulfur                                                   | 43.79               | mg/L  |
| 80    | 7723-14-0    | Phosphorus                                               | 3.521               | mg/L  |
| 81    | 14797-55-8   | Nitrate                                                  | 10.05               | mg/L  |
| 81    | 14797-65-0   | Nitrite                                                  | 25.5                | mg/L  |
| 81    | 16887-00-6   | Chloride                                                 | 51288               | mg/L  |
| 81    | 24959-67-9   | Bromide                                                  | 693                 | mg/L  |
| 81    | 7553-56-2    | Iodine                                                   | 54                  | mg/L  |
| 81    | 7664-41-7    | Ammonia                                                  | 66.28               | mg/L  |

SI Table 4a: 1198 chemicals reported as being detected in produced water, by reference

| Refid | CAS        | Name                               | Conc (Max reported) | Units |
|-------|------------|------------------------------------|---------------------|-------|
| 82    | 10544-50-0 | Octasulfur                         |                     |       |
| 82    | 105-60-2   | Caprolactam                        |                     |       |
| 82    | 115-86-6   | Triphenyl phosphate                |                     |       |
| 82    | 117-84-0   | Di-n-octyl phthalate               |                     |       |
| 82    | 126-73-8   | Tributyl phosphate                 |                     |       |
| 82    | 128-39-2   | 2,6-Di-tert-butylphenol            |                     |       |
| 82    | 140-66-9   | 4-(1,1,3,3-Tetramethylbutyl)phenol |                     |       |
| 82    | 143-07-7   | Dodecanoic acid                    |                     |       |
| 82    | 18496-25-8 | Sulfide                            |                     |       |
| 82    | 27601-00-9 | Methylquinoline                    |                     |       |
| 82    | 28652-72-4 | Methyl-1,1'-biphenyl               |                     |       |
| 82    | 544-63-8   | Tetradecanoic acid                 |                     |       |
| 82    | 57-10-3    | Hexadecanoic acid                  |                     |       |
| 82    | 57-11-4    | Octadecanoic acid                  |                     |       |
| 82    | 7440-17-7  | Rubidium                           |                     |       |
| 82    | 7440-46-2  | Cesium                             |                     |       |
| 82    | 7553-56-2  | Iodine                             |                     |       |
| 82    | 91-20-3    | Naphthalene                        |                     |       |
| 82    | 95-16-9    | Benzothiazole                      |                     |       |
| 83    | 7440-09-7  | Potassium                          |                     |       |
| 83    | 10544-50-0 | Octasulfur                         | 0.009629866         | mg/L  |
| 83    | 105-60-2   | Caprolactam                        | 0.002392004         | mg/L  |
| 83    | 115-86-6   | Triphenyl phosphate                | 0.00677137          | mg/L  |
| 83    | 117-81-7   | Di(2-ethylhexyl) phthalate         | 0.002296103         | mg/L  |
| 83    | 124-38-9   | Carbon dioxide                     | 634                 | mg/L  |
| 83    | 126-73-8   | Tributyl phosphate                 | 0.002664287         | mg/L  |
| 83    | 1321-94-4  | Methylnaphthalene                  | 0.015553579         | mg/L  |
| 83    | 140-66-9   | 4-(1,1,3,3-Tetramethylbutyl)phenol | 0.018338478         | mg/L  |
| 83    | 14265-44-2 | Phosphate                          | 3.57                | mg/L  |
| 83    | 143-07-7   | Dodecanoic acid                    | 0.002517211         | mg/L  |
| 83    | 14797-55-8 | Nitrate                            | 27.8                | mg/L  |
| 83    | 14797-65-0 | Nitrite                            | 0.633               | mg/L  |
| 83    | 14808-79-8 | Sulfate                            | 302                 | mg/L  |
| 83    | 16887-00-6 | Chloride                           | 42800               | mg/L  |
| 83    | 16984-48-8 | Fluoride                           | 22.6                | mg/L  |
| 83    | 24959-67-9 | Bromide                            | 0.15                | mg/L  |
| 83    | 25447-95-4 | Hexadecenoic acid                  | 0.008368372         | mg/L  |
| 83    | 26764-26-1 | Octadecenoic acid                  | 0.003472104         | mg/L  |
| 83    | 27601-00-9 | Methylquinoline                    | 0.003749272         | mg/L  |
| 83    | 28652-72-4 | Methyl-1,1'-biphenyl               | 0.00213067          | mg/L  |
| 83    | 28804-88-8 | Dimethylnaphthalene                | 0.009506014         | mg/L  |
| 83    | 3812-32-6  | Carbonate                          | 64                  | mg/L  |
| 83    | 544-63-8   | Tetradecanoic acid                 | 0.005315497         | mg/L  |
| 83    | 57-10-3    | Hexadecanoic acid                  | 0.003021193         | mg/L  |
| 83    | 57-11-4    | Octadecanoic acid                  | 0.00373392          | mg/L  |
| 83    | 71-52-3    | Bicarbonate                        | 978                 | mg/L  |
| 83    | 7429-90-5  | Aluminum                           | 0.099               | mg/L  |
| 83    | 7439-89-6  | Iron                               | 93.1                | mg/L  |
| 83    | 7439-92-1  | Lead                               | 0.155               | mg/L  |
| 83    | 7439-93-2  | Lithium                            | 8.94                | mg/L  |
| 83    | 7439-95-4  | Magnesium                          | 392                 | mg/L  |
| 83    | 7439-96-5  | Manganese                          | 4.84                | mg/L  |
| 83    | 7439-97-6  | Mercury                            | 0.000023            | mg/L  |
| 83    | 7439-98-7  | Molybdenum                         | 0.067               | mg/L  |
| 83    | 7440-02-0  | Nickel                             | 0.358               | mg/L  |
| 83    | 7440-23-5  | Sodium                             | 16700               | mg/L  |
| 83    | 7440-24-6  | Strontium                          | 142                 | mg/L  |
| 83    | 7440-28-0  | Thallium                           | 0.0386              | mg/L  |
| 83    | 7440-31-5  | Tin                                | 0.0086              | mg/L  |
| 83    | 7440-36-0  | Antimony                           | 0.0219              | mg/L  |
| 83    | 7440-38-2  | Arsenic                            | 0.0122              | mg/L  |
| 83    | 7440-39-3  | Barium                             | 281                 | mg/L  |
| 83    | 7440-41-7  | Beryllium                          | 0.0014              | mg/L  |
| 83    | 7440-42-8  | Boron                              | 0.493               | mg/L  |
| 83    | 7440-43-9  | Cadmium                            | 0.012               | mg/L  |
| 83    | 7440-48-4  | Cobalt                             | 0.115               | mg/L  |
| 83    | 7440-62-2  | Vanadium                           | 0.0386              | mg/L  |
| 83    | 7440-66-6  | Zinc                               | 0.278               | mg/L  |
| 83    | 7440-70-2  | Calcium                            | 1350                | mg/L  |
| 83    | 7631-86-9  | Silica                             | 18.1                | mg/L  |
| 83    | 7664-41-7  | Ammonia                            | 8.91                | mg/L  |
| 83    | 7723-14-0  | Phosphorus                         | 3.25                | mg/L  |

SI Table 4a: 1198 chemicals reported as being detected in produced water, by reference

| Refid | CAS        | Name                             | Conc (Max reported) | Units |
|-------|------------|----------------------------------|---------------------|-------|
| 83    | 7727-37-9  | Nitrogen                         | 38.4                | mg/L  |
| 83    | 7782-49-2  | Selenium                         | 0.0407              | mg/L  |
| 83    | 879-12-9   | 1,2,3-Trimethylnaphthalene       | 0.004485087         | mg/L  |
| 83    | 91-20-3    | Naphthalene                      | 0.006566544         | mg/L  |
| 83    | 95-16-9    | Benzothiazole                    | 0.00304147          | mg/L  |
| 83    | 96-76-4    | 2,4-Di-tert-butylphenol          | 0.004941527         | mg/L  |
| 84    | 7440-09-7  | Potassium                        | 2260                | mg/L  |
| 84    | 14798-03-9 | Ammonium                         | 976                 | mg/L  |
| 84    | 14808-79-8 | Sulfate                          | 3100                | mg/L  |
| 84    | 16887-00-6 | Chloride                         | 185000              | mg/L  |
| 84    | 16984-48-8 | Fluoride                         | 7.3                 | mg/L  |
| 84    | 24959-67-9 | Bromide                          | 218                 | mg/L  |
| 84    | 71-52-3    | Bicarbonate                      | 560                 | mg/L  |
| 84    | 7439-93-2  | Lithium                          | 24600               | mg/L  |
| 84    | 7439-95-4  | Magnesium                        | 859                 | mg/L  |
| 84    | 7439-96-5  | Manganese                        | 931                 | mg/L  |
| 84    | 7440-23-5  | Sodium                           | 104000              | mg/L  |
| 84    | 7440-39-3  | Barium                           | 4060                | mg/L  |
| 84    | 7440-42-8  | Boron                            | 176000              | mg/L  |
| 84    | 7440-46-2  | Cesium                           | 537                 | mg/L  |
| 84    | 7440-70-2  | Calcium                          | 8441                | mg/L  |
| 85    | 7440-09-7  | Potassium                        | 2040                | mg/L  |
| 85    | 14808-79-8 | Sulfate                          | 1230                | mg/L  |
| 85    | 16887-00-6 | Chloride                         | 121000              | mg/L  |
| 85    | 16984-48-8 | Fluoride                         | 2.65                | mg/L  |
| 85    | 24959-67-9 | Bromide                          | 240                 | mg/L  |
| 85    | 471-34-1   | Carbonic acid calcium salt (1:1) | 142                 | mg/L  |
| 85    | 7439-93-2  | Lithium                          | 31.9                | mg/L  |
| 85    | 7439-95-4  | Magnesium                        | 961                 | mg/L  |
| 85    | 7439-96-5  | Manganese                        | 0.101               | mg/L  |
| 85    | 7440-17-7  | Rubidium                         | 4.37                | mg/L  |
| 85    | 7440-23-5  | Sodium                           | 70500               | mg/L  |
| 85    | 7440-24-6  | Strontium                        | 16.8                | mg/L  |
| 85    | 7440-39-3  | Barium                           | 0.856               | mg/L  |
| 85    | 7440-42-8  | Boron                            | 230                 | mg/L  |
| 85    | 7440-70-2  | Calcium                          | 5030                | mg/L  |
| 85    | 7553-56-2  | Iodine                           | 29.5                | mg/L  |
| 86    | 7440-09-7  | Potassium                        | 473                 | mg/L  |
| 86    | 14808-79-8 | Sulfate                          | 4880                | mg/L  |
| 86    | 16887-00-6 | Chloride                         | 20600               | mg/L  |
| 86    | 17341-25-2 | Sodium ion                       | 13900               | mg/L  |
| 86    | 24959-67-9 | Bromide                          | 13.7                | mg/L  |
| 86    | 71-52-3    | Bicarbonate                      | 1800                | mg/L  |
| 86    | 7429-90-5  | Aluminum                         | 0.406               | mg/L  |
| 86    | 7439-93-2  | Lithium                          | 2.36                | mg/L  |
| 86    | 7439-95-4  | Magnesium                        | 486                 | mg/L  |
| 86    | 7439-96-5  | Manganese                        | 0.648               | mg/L  |
| 86    | 7440-02-0  | Nickel                           | 0.356               | mg/L  |
| 86    | 7440-17-7  | Rubidium                         | 0.276               | mg/L  |
| 86    | 7440-21-3  | Silicon                          | 12.2                | mg/L  |
| 86    | 7440-24-6  | Strontium                        | 36.8                | mg/L  |
| 86    | 7440-39-3  | Barium                           | 0.0573              | mg/L  |
| 86    | 7440-42-8  | Boron                            | 4.64                | mg/L  |
| 86    | 7440-50-8  | Copper                           | 0.0168              | mg/L  |
| 86    | 7440-61-1  | Uranium                          | 0.0021              | mg/L  |
| 86    | 7440-70-2  | Calcium                          | 1600                | mg/L  |
| 87    | 7439-96-5  | Manganese                        | 11.2                | mg/L  |
| 87    | 7440-39-3  | Barium                           | 12000               | mg/L  |
| 87    | 7440-61-1  | Uranium                          | 0.00326             | mg/L  |
| 88    | 17341-25-2 | Sodium ion                       | 69500               | mg/L  |
| 88    | 7439-93-2  | Lithium                          | 233                 | mg/L  |
| 89    | 2157-01-9  | Octyl methacrylate               |                     |       |
| 89    | 2272-03-9  | Butylidencyclohexane             |                     |       |
| 89    | 2274-11-5  | Ethylene acrylate                |                     |       |
| 89    | 2883-05-8  | Octane, 2-cyclohexyl-            |                     |       |
| 89    | 2884-06-2  | 2,3-Dimethylnonane               |                     |       |
| 89    | 2935-07-1  | 1H-Phenalene, dodecahydro-       |                     |       |
| 89    | 5744-03-6  | 1H-Fluorene, dodecahydro-        |                     |       |
| 89    | 5911-04-6  | 3-Methylnonane                   |                     |       |
| 89    | 7440-09-7  | Potassium                        | 101.15              | mg/L  |
| 89    | 1002-43-3  | Undecane, 3-methyl-              |                     |       |
| 89    | 1003-64-1  | Cyclohexane, ethylidene-         |                     |       |

SI Table 4a: 1198 chemicals reported as being detected in produced water, by reference

| Refid | CAS         | Name                                                                   | Conc (Max reported) | Units |
|-------|-------------|------------------------------------------------------------------------|---------------------|-------|
| 89    | 100463-01-2 | 2,4-Dimethyl-1,5-diazabicyclo[3.1.0]hexane (cis)                       |                     |       |
| 89    | 100-49-2    | Cyclohexanemethanol                                                    |                     |       |
| 89    | 1008-80-6   | 2,3-Dimethyldecahydronaphthalene                                       |                     |       |
| 89    | 10374-74-0  | 7-Tetradecene                                                          |                     |       |
| 89    | 105882-89-1 | Ethanamine, 2,2'-azobis[N,N,1,1,2,2-hexafluoro-                        |                     |       |
| 89    | 106-90-1    | Glycidyl acrylate                                                      |                     |       |
| 89    | 111-84-2    | Nonane                                                                 |                     |       |
| 89    | 1120-21-4   | Undecane                                                               |                     |       |
| 89    | 1123-09-7   | 2-Cyclohexen-1-one, 3,5-dimethyl-                                      |                     |       |
| 89    | 112-39-0    | Methyl hexadecanoate                                                   |                     |       |
| 89    | 112-40-3    | Dodecane                                                               |                     |       |
| 89    | 1124-25-0   | Cyclohexane, 1-methyl-4-(1-methylethenyl)-, trans-                     |                     |       |
| 89    | 112-62-9    | Methyl (9Z)-octadec-9-enoate                                           |                     |       |
| 89    | 1137-00-4   | d,l-7-Azatryptophan                                                    |                     |       |
| 89    | 114482-57-4 | 4-Cyanophenyl 4-(3-butenyloxy)benzoate                                 |                     |       |
| 89    | 114774-79-7 | p-Nitrophenyl 1-azetidinedicarboxylate                                 |                     |       |
| 89    | 116164-06-8 | 3-Heptene, 2,2,3,5,6-pentamethyl-                                      |                     |       |
| 89    | 118252-04-3 | 1-Hexyl-2-nitrocyclohexane                                             |                     |       |
| 89    | 1193-79-9   | 5-Methyl-2-furylmethylketone                                           |                     |       |
| 89    | 122-84-9    | 2-Propanone, 1-(4-methoxyphenyl)-                                      |                     |       |
| 89    | 13066-95-0  | 1,3-Benzenediol, 4-amino-                                              |                     |       |
| 89    | 13150-81-7  | 2,6-Dimethyldecane                                                     |                     |       |
| 89    | 13151-34-3  | 3-Methyldecane                                                         |                     |       |
| 89    | 13151-35-4  | 5-Methyldecane                                                         |                     |       |
| 89    | 13151-63-8  | Cyclodecene, 1-methyl-, (E)-                                           |                     |       |
| 89    | 13287-21-3  | 6-Methyltridecane                                                      |                     |       |
| 89    | 13472-79-2  | 2-Hydroxy-5-iodopyridine                                               |                     |       |
| 89    | 13485-66-0  | 2(1H)-Naphthalenone, 4a,5,6,7,8,8a-hexahydro-4a,8a-dimethyl-, cis-     |                     |       |
| 89    | 135241-50-8 | Propanamide, 2-(4-isobutylphenyl)-N-(3,5-dinitrophenyl)-               |                     |       |
| 89    | 13726-52-8  | Diethyl N-(4-aminobenzoyl)-L-glutamate                                 |                     |       |
| 89    | 13925-05-8  | Pyrazine, 2-methyl-5-(1-methylethyl)-                                  |                     |       |
| 89    | 13943-77-6  | Naphthalene, 1,2,3,4,4a,5,6,7-octahydro-4a-methyl-                     |                     |       |
| 89    | 14127-61-8  | Calcium ion                                                            | 2392.03             | mg/L  |
| 89    | 142132-75-0 | Propane, 1-(di-t-butylphosphino)-3-(2,4,6-tri-t-butylphenyl)phosphino- |                     |       |
| 89    | 14339-23-2  | 1H-Pyrazole, 5-ethyl-4,5-dihydro-1,4-dimethyl-                         |                     |       |
| 89    | 14360-50-0  | 1-Hexanone, 1-(2-furanyl)-                                             |                     |       |
| 89    | 14449-42-4  | 1-sec-Butyladamantane                                                  |                     |       |
| 89    | 14451-87-7  | Tricyclo(3.3.1.13,7)decane, 2-ethyl-                                   |                     |       |
| 89    | 14451-88-8  | 2-n-Propyladamantane                                                   |                     |       |
| 89    | 1454-84-8   | n-Nonadecanol-1                                                        |                     |       |
| 89    | 14676-29-0  | 3-Ethyl-2-methylheptane                                                |                     |       |
| 89    | 14808-79-8  | Sulfate                                                                | 41.7                | mg/L  |
| 89    | 1486-75-5   | cyclododecene, (e)-                                                    |                     |       |
| 89    | 1502-38-1   | Cyclooctane, methyl-                                                   |                     |       |
| 89    | 1522-22-1   | 1,1,1,5,5,5-Hexafluoroacetylacetone                                    |                     |       |
| 89    | 15232-78-7  | Cyclohexene,3-hexyl-                                                   |                     |       |
| 89    | 15232-86-7  | 1-Heptylcyclohexene                                                    |                     |       |
| 89    | 1528-22-9   | Cyclobutane, (1-methylethylidene)-                                     |                     |       |
| 89    | 15496-01-2  | Ditrifluoromethyl(chlorocarbonyloxy)amine                              |                     |       |
| 89    | 1560-96-9   | 2-Methyltridecane                                                      |                     |       |
| 89    | 1560-97-0   | 2-Methylododecane                                                      |                     |       |
| 89    | 15869-93-9  | 3,5-Dimethyloctane                                                     |                     |       |
| 89    | 1595-16-0   | 1-(Butan-2-yl)-4-methylbenzene                                         |                     |       |
| 89    | 1606-08-2   | Cyclopentylcyclohexane                                                 |                     |       |
| 89    | 1618-22-0   | naphthalene, decahydro-2,6-dimethyl-                                   |                     |       |
| 89    | 1632-70-8   | Undecane, 5-methyl-                                                    |                     |       |
| 89    | 1636-44-8   | Decane, 4-ethyl-                                                       |                     |       |
| 89    | 16538-89-9  | cyclooctane, (1-methylpropyl)-                                         |                     |       |
| 89    | 16580-24-8  | 1-Methyl-3-propan-2-ylcyclohexane                                      |                     |       |
| 89    | 16580-26-0  | cyclohexane, 1-isopropyl-1-methyl-                                     |                     |       |
| 89    | 1660-04-4   | Methyl tricyclo(3.3.1.13,7)dec-1-yl ketone                             |                     |       |
| 89    | 1667-00-1   | Benzylcyclopropane                                                     |                     |       |
| 89    | 166773-56-4 | 2,3-Dimethyl-5-(2,6,10-trimethylundecyl) furan                         |                     |       |
| 89    | 16681-68-8  | 2H-1,2,3-Triazole-4-carbaldehyde                                       |                     |       |
| 89    | 1671-77-8   | 1-Pentanone, 1-(4-methylphenyl)-                                       |                     |       |
| 89    | 1674-10-8   | Cyclohexene, 1,2-dimethyl-                                             |                     |       |
| 89    | 16747-30-1  | 2,4,4-Trimethylhexane                                                  |                     |       |
| 89    | 16747-50-5  | Cyclopentane, 1-ethyl-1- methyl-                                       |                     |       |
| 89    | 1678-93-9   | Butylcyclohexane                                                       |                     |       |
| 89    | 1687-34-9   | 1-Ethyl-3-methyladamantane                                             |                     |       |
| 89    | 1687-35-0   | 1,3-Dimethyl-5-ethyladamantane                                         |                     |       |
| 89    | 16887-00-6  | Chloride                                                               | 38414.67            | mg/L  |

SI Table 4a: 1198 chemicals reported as being detected in produced water, by reference

| Refid | CAS         | Name                                                                                      | Conc (Max reported) | Units |
|-------|-------------|-------------------------------------------------------------------------------------------|---------------------|-------|
| 89    | 17301-23-4  | 2,6-Dimethylundecane                                                                      |                     |       |
| 89    | 17301-32-5  | 4,7-Dimethylundecane                                                                      |                     |       |
| 89    | 17301-94-9  | 4-Methylnonane                                                                            |                     |       |
| 89    | 17302-23-7  | Nonane, 4,5-dimethyl-                                                                     |                     |       |
| 89    | 17302-27-1  | Nonane, 2,5-dimethyl-                                                                     |                     |       |
| 89    | 17302-28-2  | Nonane, 2,6-dimethyl-                                                                     |                     |       |
| 89    | 17302-32-8  | 3,7-Dimethylnonane                                                                        |                     |       |
| 89    | 17302-33-9  | 6-Methylundecane                                                                          |                     |       |
| 89    | 17312-50-4  | 2,5-Dimethyldecane                                                                        |                     |       |
| 89    | 17312-53-7  | 3,6-Dimethyldecane                                                                        |                     |       |
| 89    | 17312-57-1  | 3-Methyldodecane                                                                          |                     |       |
| 89    | 17312-59-3  | Undecane, 4-ethyl-                                                                        |                     |       |
| 89    | 17312-60-6  | Undecane, 6-ethyl-                                                                        |                     |       |
| 89    | 17312-62-8  | 5-Propyldecane                                                                            |                     |       |
| 89    | 17312-77-5  | 2,3-Dimethylundecane                                                                      |                     |       |
| 89    | 17312-80-0  | 2,4-Dimethylundecane                                                                      |                     |       |
| 89    | 17453-94-0  | Undecane, 5-ethyl-                                                                        |                     |       |
| 89    | 1750-51-2   | Naphthalene, decahydro-1,6-dimethyl-                                                      |                     |       |
| 89    | 176-63-6    | Spiro(4-5)decane                                                                          |                     |       |
| 89    | 17851-53-5  | Butyl isobutyl phthalate                                                                  |                     |       |
| 89    | 1795-15-9   | Cyclohexane, octyl-                                                                       |                     |       |
| 89    | 180-43-8    | Spiro(5.5)undecane                                                                        |                     |       |
| 89    | 18294-04-7  | Ethanedioic acid, bis(trimethylsilyl) ester                                               |                     |       |
| 89    | 18344-37-1  | heptadecane, 2,6,10,14-tetramethyl-                                                       |                     |       |
| 89    | 18435-22-8  | Tetradecane, 3-methyl-                                                                    |                     |       |
| 89    | 1879-07-8   | Cyclohexane, 1-methyl-4-(1-methylethenyl)-, cis-                                          |                     |       |
| 89    | 188645-81-0 | 3,4-Dichlorophenol, tert-butyl(dimethylsilyl) ether                                       |                     |       |
| 89    | 1888-57-9   | 3-Hexanone, 2,5-dimethyl- (8Cl)(9Cl)                                                      |                     |       |
| 89    | 19385-87-6  | 1,3-Dimethyl-5-n-propyl-adamantane                                                        |                     |       |
| 89    | 19549-87-2  | 2,4-Dimethyl-1-heptene                                                                    |                     |       |
| 89    | 19550-75-5  | 2,2-dimethyl-3-heptene trans                                                              |                     |       |
| 89    | 19744-64-0  | 1H-Indene, octahydro-5-methyl-                                                            |                     |       |
| 89    | 20278-89-1  | Heptane, 3,4,5-trimethyl-                                                                 |                     |       |
| 89    | 20309-77-7  | Cyclopentane, 1,1,3,4-tetramethyl-, trans-                                                |                     |       |
| 89    | 20396-49-0  | tert-Butyl cyclohexanecarboxyperoxyate                                                    |                     |       |
| 89    | 2049-95-8   | tert-Pentylbenzene                                                                        |                     |       |
| 89    | 2051-30-1   | 2,6-Dimethyloctane                                                                        |                     |       |
| 89    | 20633-03-8  | 2,2,5-Trimethylhexane-3,4-dione                                                           |                     |       |
| 89    | 21868-43-9  | s-Triazine, 2-amino-4-(piperidinomethyl)-4-piperidino-                                    |                     |       |
| 89    | 219783-06-9 | 1-Isopropyl-1,4,5-trimethylcyclohexane                                                    |                     |       |
| 89    | 22052-84-2  | Heptafluoroisopropyl methyl ether                                                         |                     |       |
| 89    | 227327-87-9 | N-Adamantan-1-ylmethyl-2-chloro-5-nitro-benzamide                                         |                     |       |
| 89    | 2294-72-6   | 5-Undecyne                                                                                |                     |       |
| 89    | 23183-11-1  | 1,1'-Bicycloheptyl                                                                        |                     |       |
| 89    | 23609-46-3  | cyclooctane, 1,2-diethyl-                                                                 |                     |       |
| 89    | 2437-56-1   | 1-Tridecene                                                                               |                     |       |
| 89    | 24451-17-0  | ethyl 2-(3,4-dimethylanilino)-2-oxoacetate                                                |                     |       |
| 89    | 24959-67-9  | Bromide                                                                                   | 325.21              | mg/L  |
| 89    | 2499-95-8   | Hexyl acrylate                                                                            |                     |       |
| 89    | 25117-24-2  | 4-Methyltetradecane                                                                       |                     |       |
| 89    | 25117-31-1  | 5-Methyltridecane                                                                         |                     |       |
| 89    | 25117-32-2  | 5-Methyltetradecane                                                                       |                     |       |
| 89    | 25201-40-5  | 1,6-Heptadien-4-ol, 4-methyl-                                                             |                     |       |
| 89    | 2541-75-5   | 8-heptadecanol                                                                            |                     |       |
| 89    | 2547-26-4   | 4a-Methyldecalin                                                                          |                     |       |
| 89    | 2566-97-4   | 9,12-octadecadienoic acid, methyl ester, (e,e)-                                           |                     |       |
| 89    | 25711-30-2  | 1H-Pyrazole-4-carboxaldehyde, 1,5-dimethyl-                                               |                     |       |
| 89    | 26321-98-2  | Cyclohexane, (1-ethylpropyl)-                                                             |                     |       |
| 89    | 26730-12-1  | 4-Methyltridecane                                                                         |                     |       |
| 89    | 26730-14-3  | 7-Methyltridecane                                                                         |                     |       |
| 89    | 268543-19-7 | 1-Ethanone, 1-(1-adamantyl)-2-phenyl-                                                     |                     |       |
| 89    | 26967-64-6  | Cyclohexane, (1-methylpropyl)-                                                            |                     |       |
| 89    | 274691-67-7 | Dithiocarbaminic acid, N-cyano-, S-[3-(4-ethylphenyl)-3-oxo-1-propenyl]-S'-methyl diester |                     |       |
| 89    | 2809-64-5   | Naphthalene, 1,2,3,4-tetrahydro-5-methyl-                                                 |                     |       |
| 89    | 281-23-2    | Adamantane                                                                                |                     |       |
| 89    | 2847-72-5   | 4-Methyldecane                                                                            |                     |       |
| 89    | 286-63-5    | 9-Thiabicyclo[6.1.0]nonane                                                                |                     |       |
| 89    | 2882-98-6   | n-Nonylcyclopentane                                                                       |                     |       |
| 89    | 2896-60-8   | 4-Ethylresorcinol                                                                         |                     |       |
| 89    | 29053-04-1  | Cyclopentane, 1-methyl-3-(2-methylpropyl)-                                                |                     |       |
| 89    | 294-62-2    | Cyclododecane                                                                             |                     |       |
| 89    | 2958-76-1   | Decahydro-2-methylnaphthalene                                                             |                     |       |



SI Table 4a: 1198 chemicals reported as being detected in produced water, by reference

| Refid | CAS         | Name                                                                                      | Conc (Max reported) | Units |
|-------|-------------|-------------------------------------------------------------------------------------------|---------------------|-------|
| 89    | 296-56-0    | Cycloeicosane                                                                             |                     |       |
| 89    | 2980-69-0   | 4-Methylundecane                                                                          |                     |       |
| 89    | 30159-17-2  | Tricyclo[7.3.0.0(2,6)]dodecane, trans-anti-trans-                                         |                     |       |
| 89    | 30677-34-0  | Cyclohexane, ethylmethyl-                                                                 |                     |       |
| 89    | 3073-66-3   | 1,1,3-Trimethylcyclohexane                                                                |                     |       |
| 89    | 307-55-1    | Perfluorododecanoic acid                                                                  |                     |       |
| 89    | 31061-61-7  | Tricyclo[4.3.1.1(3,8)]undecane-3-carboxylic acid, methyl ester                            |                     |       |
| 89    | 315244-85-0 | Pyrazolo[3,4-b]pyran-5-carbonitrile, 1,4-dihydro-6-amino-4-(3,4-dichlorophenyl)-3-methyl- |                     |       |
| 89    | 3178-23-2   | Dicyclohexylmethane                                                                       |                     |       |
| 89    | 32038-83-8  | 2-Propynenitrile, 3-fluoro-                                                               |                     |       |
| 89    | 3282-53-9   | Cyclohexene, 1-butyl-                                                                     |                     |       |
| 89    | 331835-05-3 | 1-(2,4-Dihydroxybenzoyl)-3-ethyl-5-trifluoromethyl-5-hydroxy-2-pyrazoline                 |                     |       |
| 89    | 337503-48-7 | 4-Pentenoic acid, 2,2-diethyl-3-oxo-5-phenyl-, ethyl ester                                |                     |       |
| 89    | 33933-74-3  | 3-Heptene, 4-ethyl-                                                                       |                     |       |
| 89    | 3404-73-7   | 1-Pentene, 3,3-dimethyl-                                                                  |                     |       |
| 89    | 3430-33-9   | 2,6-Dimethyl-3-pyridylamine                                                               |                     |       |
| 89    | 343270-50-8 | 2-(Butyliden-2-one)tetrahydrofuran                                                        |                     |       |
| 89    | 34694-70-7  | 1,3,5,6-Tetramethyladamantane                                                             |                     |       |
| 89    | 35216-11-6  | 7-Tetradecyne                                                                             |                     |       |
| 89    | 352-70-5    | m-Fluorotoluene                                                                           |                     |       |
| 89    | 35354-38-2  | 7-Octadecyne, 2-methyl-                                                                   |                     |       |
| 89    | 36947-68-9  | 1H-Imidazole, 2-(1-methylethyl)-                                                          |                     |       |
| 89    | 371-40-4    | 4-Fluoroaniline                                                                           |                     |       |
| 89    | 376-77-2    | Decafluorocyclopentane                                                                    |                     |       |
| 89    | 3777-70-6   | 2-Hexylfuran                                                                              |                     |       |
| 89    | 3777-71-7   | Furan, 2-heptyl-                                                                          |                     |       |
| 89    | 38489-80-4  | Benzaldehyde, 3-methoxy-, oxime                                                           |                     |       |
| 89    | 3891-98-3   | 2,6,10-Trimethyldodecane                                                                  |                     |       |
| 89    | 39178-69-3  | 3-butylcyclohexanone                                                                      |                     |       |
| 89    | 39546-79-7  | Pentylidenecyclohexane                                                                    |                     |       |
| 89    | 4237-46-1   | Benzoyldiphenylmethanol                                                                   |                     |       |
| 89    | 4282-44-4   | Undecane, 1-iodo-                                                                         |                     |       |
| 89    | 4291-79-6   | 1-Methyl-2-propyl-cyclohexane                                                             |                     |       |
| 89    | 4292-75-5   | Hexylcyclohexane                                                                          |                     |       |
| 89    | 4292-92-6   | Pentylcyclohexane                                                                         |                     |       |
| 89    | 432-04-2    | Phosphine, tris(trifluoromethyl)-                                                         |                     |       |
| 89    | 4360-57-0   | 2-Pentadecyl-1,3-dioxolane                                                                |                     |       |
| 89    | 4431-89-4   | (Cyclopentylmethyl)cyclohexane                                                            |                     |       |
| 89    | 4516-69-2   | 1,1,3-Trimethylcyclopentane                                                               |                     |       |
| 89    | 4551-51-3   | 1H-Indene, octahydro-, cis-                                                               |                     |       |
| 89    | 4674-23-1   | 1,2-Di(2,4,6-trimethylphenyl)ethane                                                       |                     |       |
| 89    | 47145-46-0  | 3,4-Dihydroisoquinolin-7-ol, 1-[4-hydroxybenzyl]-6-methoxy-                               |                     |       |
| 89    | 489-20-3    | 1-Isopropyl-2,3-dimethylcyclopentane                                                      |                     |       |
| 89    | 497-32-5    | Bicyclo[2.2.1]heptane, 2,2-dimethyl-5-methylene-                                          |                     |       |
| 89    | 5004-45-5   | 4-Phenylphthalazin-1(2H)-one                                                              |                     |       |
| 89    | 50617-19-1  | 2,5,8-Triphenyl benzotriazole                                                             |                     |       |
| 89    | 50876-32-9  | CYCLOHEXANE, 1,1,3,5-TETRAMETHYL-, CIS-                                                   |                     |       |
| 89    | 50991-08-7  | 1,1'-Bicyclohexyl, 2-methyl-, cis-                                                        |                     |       |
| 89    | 50991-09-8  | 1,1'-Bicyclohexyl, 2-methyl-, trans-                                                      |                     |       |
| 89    | 526-73-8    | 1,2,3-Trimethylbenzene                                                                    |                     |       |
| 89    | 527-54-8    | 3,4,5-Trimethylphenol                                                                     |                     |       |
| 89    | 52856-01-6  | 2-Ethoxy-4,4,5,5-tetramethyloxazoline                                                     |                     |       |
| 89    | 52873-50-4  | 1,3-Dimethyl-5-n-hexyladamantane                                                          |                     |       |
| 89    | 52896-87-4  | Heptane, 4-(1-methylethyl)-                                                               |                     |       |
| 89    | 53366-55-5  | Pentylidenecyclopentane                                                                   |                     |       |
| 89    | 5380-87-0   | Furfuryl glycidyl ether                                                                   |                     |       |
| 89    | 53907-60-1  | Cyclopentane, 1,1,3,4-tetramethyl-, cis-                                                  |                     |       |
| 89    | 54163-69-8  | Isopilocarpine                                                                            |                     |       |
| 89    | 542-28-9    | Tetrahydro-2H-pyran-2-one                                                                 |                     |       |
| 89    | 54410-98-9  | 1-nonene, 4,6,8-trimethyl-                                                                |                     |       |
| 89    | 54411-17-5  | Cyclohexane, 1,4-dimethyl-2-(2-methylpropyl)-, (1à,2à,4à)-                                |                     |       |
| 89    | 544-76-3    | Hexadecane                                                                                |                     |       |
| 89    | 54676-39-0  | 2-BUTYL-1,1,3-TRIMETHYL-CYCLOHEXANE                                                       |                     |       |
| 89    | 54699-35-3  | 1,2,4-Benzenetricarboxylic acid, 1,2-dimethyl ester                                       |                     |       |
| 89    | 54823-95-9  | Cyclohexane, 1-(cyclohexylmethyl)-3-methyl-, trans-                                       |                     |       |
| 89    | 54823-98-2  | Cyclohexane, 1-(cyclohexylmethyl)-4-methyl-, trans-                                       |                     |       |
| 89    | 54832-83-6  | 1H-Indene, octahydro-2,2,4,4,7,7-hexamethyl-, trans-                                      |                     |       |
| 89    | 54833-48-6  | Heptadecane, 2,6,10,15-tetramethyl                                                        |                     |       |
| 89    | 55044-33-2  | 1h-indene, 2-butyl-5-hexyloctahydro-                                                      |                     |       |
| 89    | 55170-90-6  | Bicyclo[2.2.1]heptane, 2-(1-buten-3-yl)-                                                  |                     |       |
| 89    | 55282-34-3  | Cyclohexane, 1,3,5-trimethyl-2-octadecyl-                                                 |                     |       |
| 89    | 55402-13-6  | 2,2,7-Trimethyl-3-octyne                                                                  |                     |       |

SI Table 4a: 1198 chemicals reported as being detected in produced water, by reference

| Refid | CAS        | Name                                                                     | Conc (Max reported) | Units |
|-------|------------|--------------------------------------------------------------------------|---------------------|-------|
| 89    | 554-59-6   | Carane                                                                   |                     |       |
| 89    | 557-35-7   | octane, 2-bromo-                                                         |                     |       |
| 89    | 56292-65-0 | 2,5-Dimethyldodecane                                                     |                     |       |
| 89    | 56292-69-4 | Tetradecane, 2,5-dimethyl-                                               |                     |       |
| 89    | 563-16-6   | 3,3-Dimethylhexane                                                       |                     |       |
| 89    | 56325-56-5 | Cyclodecene, 3-bromo-                                                    |                     |       |
| 89    | 56442-17-2 | 4-(4-Fluorobenzyloxy)benzaldehyde                                        |                     |       |
| 89    | 5661-80-3  | Bicyclo[5.3.0]decane                                                     |                     |       |
| 89    | 56936-67-5 | Glycine, N-trifluoroacetyl-, isopropyl ester                             |                     |       |
| 89    | 58422-90-5 | 1,3-Dioxolane-2-heptanenitrile, à-methyl-è-oxo-2-phenyl-                 |                     |       |
| 89    | 58462-32-1 | trans, trans-3-Ethylbicyclo[4.4.0]decane                                 |                     |       |
| 89    | 588-16-9   | 3-Methoxyacetanilide                                                     |                     |       |
| 89    | 59303-13-8 | 2-Methyl-5-propionylthiophene                                            |                     |       |
| 89    | 594-91-2   | Perfluoro-2-methylbutane                                                 |                     |       |
| 89    | 60186-80-3 | 5-Tridecyne                                                              |                     |       |
| 89    | 60212-33-1 | 4-Tetradecyne                                                            |                     |       |
| 89    | 6044-71-9  | Dodecane, 6-methyl-                                                      |                     |       |
| 89    | 6069-98-3  | Cyclohexane, 1-methyl-4-(1-methylethyl)-, cis-                           |                     |       |
| 89    | 61141-80-8 | Cyclohexane, 1,2-diethyl-3-methyl-                                       |                     |       |
| 89    | 61142-24-3 | cyclohexane, 1,2,4,5-tetraethyl-, (1.alpha.,2.alpha.,4.alpha.,5.alpha.)- |                     |       |
| 89    | 61142-32-3 | Cyclopentene, 1,3-dimethyl-2-(1-methylethyl)-                            |                     |       |
| 89    | 61142-66-3 | cyclopentene, 5-hexyl-3,3-dimethyl-                                      |                     |       |
| 89    | 61142-68-5 | 1-Hexyl-3-methylcyclopentane                                             |                     |       |
| 89    | 61142-70-9 | 2,4-Diethyl-1-methylcyclohexane                                          |                     |       |
| 89    | 61177-16-0 | Bicyclo[2.2.1]heptane, 2-butyl-                                          |                     |       |
| 89    | 6117-97-1  | 4-Methyldodecane                                                         |                     |       |
| 89    | 61208-94-4 | Cyclohexane, (1-methylbutyl)-                                            |                     |       |
| 89    | 615-43-0   | o-Iodoaniline                                                            |                     |       |
| 89    | 61985-25-9 | 4-Acetylimidazole                                                        |                     |       |
| 89    | 62016-37-9 | 2,4,6-Trimethyloctane                                                    |                     |       |
| 89    | 62108-25-2 | Decane, 2,6,7-trimethyl-                                                 |                     |       |
| 89    | 62108-27-4 | decane, 2,4,6-trimethyl-                                                 |                     |       |
| 89    | 621-42-1   | 3-Acetamidophenol                                                        |                     |       |
| 89    | 62185-55-1 | Nonane, 4-methyl-5-propyl-                                               |                     |       |
| 89    | 62187-13-7 | 3-Octene, 2,2-dimethyl-, (E)-                                            |                     |       |
| 89    | 62199-52-4 | 1,2-Dibutylcyclopentane                                                  |                     |       |
| 89    | 62238-11-3 | 2,3,5-Trimethyl-decane                                                   |                     |       |
| 89    | 62238-13-5 | 2,3,7-Trimethyldecane                                                    |                     |       |
| 89    | 62238-15-7 | Decane, 2,3,4-trimethyl-                                                 |                     |       |
| 89    | 62238-32-8 | cyclohexane, 1-ethyl-1,4-dimethyl-, trans-                               |                     |       |
| 89    | 62376-17-4 | 1,2-Dimethyl-3-pentyl-4-propylcyclohexane                                |                     |       |
| 89    | 624-29-3   | Cyclohexane, 1,4-dimethyl-, cis-                                         |                     |       |
| 89    | 6248-88-0  | Bicyclo[2.2.1]heptane, 1,3,3-trimethyl-                                  |                     |       |
| 89    | 626-03-9   | 2,4-Dihydroxypyridine                                                    |                     |       |
| 89    | 629-50-5   | Tridecane                                                                |                     |       |
| 89    | 629-59-4   | Tetradecane                                                              |                     |       |
| 89    | 62960-77-4 | 4-Octene, 2,6-dimethyl-, [S-(Z)]-                                        |                     |       |
| 89    | 629-73-2   | 1-Hexadecene                                                             |                     |       |
| 89    | 629-78-7   | Heptadecane                                                              |                     |       |
| 89    | 6305-52-8  | 2-n-Butyldecahydronaphthalene                                            |                     |       |
| 89    | 63088-19-7 | (4R*,5R*,9S*)-5,9-Dimethylspiro[3.5]nonan-1-one                          |                     |       |
| 89    | 63263-09-2 | 1,3-Dimethyladamantan-5-carboxylic acid, ethyl ester                     |                     |       |
| 89    | 63798-30-1 | 2-Butynamide, N-methyl-                                                  |                     |       |
| 89    | 63830-68-2 | 4-Nonene, 2,3,3-trimethyl-, (Z)-                                         |                     |       |
| 89    | 6418-41-3  | tridecane, 3-methyl-                                                     |                     |       |
| 89    | 64341-49-7 | 1-Bromo-3-butene-2-ol                                                    |                     |       |
| 89    | 645-10-3   | 1,7-dimethyl-4-(1-methylethyl)cyclodecane                                |                     |       |
| 89    | 65996-50-1 | 1H-Pyrrolo[3,2-d]pyrimidine-2,4(3H,5H)-dione                             |                     |       |
| 89    | 66552-62-3 | Naphthalene, decahydro-1,5-dimethyl-                                     |                     |       |
| 89    | 66660-37-5 | Trans, trans-2-ethylbicyclo[4.4.0]decane                                 |                     |       |
| 89    | 66660-38-6 | cis, trans-2-Ethylbicyclo[4.4.0]decane                                   |                     |       |
| 89    | 66660-42-2 | cis, cis-3-ethylbicyclo[4.4.0]decane                                     |                     |       |
| 89    | 6708-17-4  | Bicyclooctyl                                                             |                     |       |
| 89    | 6783-92-2  | cyclohexane, 1,1,2,3-tetramethyl-                                        |                     |       |
| 89    | 693-13-0   | Diisopropylcarbodiimide                                                  |                     |       |
| 89    | 69462-10-8 | 2,2,4-Trimethylpentanenitrile                                            |                     |       |
| 89    | 696-29-7   | Cyclohexane, (1-methylethyl)-                                            |                     |       |
| 89    | 6975-98-0  | 2-Methyldecane                                                           |                     |       |
| 89    | 697-82-5   | 2,3,5-Trimethylphenol                                                    |                     |       |
| 89    | 69855-48-7 | 1-Methyl-4-(methylsulfonyl)bicyclo[2.2.2]octane                          |                     |       |
| 89    | 702-79-4   | 1,3-Dimethyladamantane                                                   |                     |       |
| 89    | 7040-53-1  | Dicyclohexyl methylphosphonate                                           |                     |       |

SI Table 4a: 1198 chemicals reported as being detected in produced water, by reference

| Refid | CAS        | Name                                                              | Conc (Max reported) | Units |
|-------|------------|-------------------------------------------------------------------|---------------------|-------|
| 89    | 7045-70-7  | 1,3-Diisopropyl cyclohexane                                       |                     |       |
| 89    | 7045-71-8  | 2-Methylundecane                                                  |                     |       |
| 89    | 707-35-7   | 1,3,5-Trimethyladamantane                                         |                     |       |
| 89    | 7145-99-5  | 1,3-Benzodioxole, 5-methyl-                                       |                     |       |
| 89    | 71940-29-9 | 3,4-Dimethyl-2-(3-methyl-butyl)-benzoic acid, methyl ester        |                     |       |
| 89    | 7216-42-4  | Isonicotinaldehyde 1-oxide                                        |                     |       |
| 89    | 74054-92-5 | 1,1,6,6-tetramethylspiro[4.4]nonane                               |                     |       |
| 89    | 7411-16-7  | 3-Ethyl-1,2,4(1H)-triazole                                        |                     |       |
| 89    | 7439-89-6  | Iron                                                              | 73.31               | mg/L  |
| 89    | 7439-95-4  | Magnesium                                                         | 336.28              | mg/L  |
| 89    | 7440-23-5  | Sodium                                                            | 17421.58            | mg/L  |
| 89    | 7440-24-6  | Strontium                                                         | 1013.25             | mg/L  |
| 89    | 7440-39-3  | Barium                                                            | 3350.5              | mg/L  |
| 89    | 74421-09-3 | cyclopentane, 1,1,3-trimethyl-3-(2-methyl-2-propenyl)-            |                     |       |
| 89    | 74630-16-3 | Phosphonous dichloride, (1,7,7-trimethylbicyclo[2.2.1]hept-2-yl)- |                     |       |
| 89    | 74663-66-4 | Cyclohexane, 1,5-diethyl-2,3-dimethyl-                            |                     |       |
| 89    | 74663-71-1 | cyclohexane, 1,1'-(1,2-dimethyl-1,2-ethanediyl)bis-               |                     |       |
| 89    | 74685-30-6 | 5-eicosene, (e)-                                                  |                     |       |
| 89    | 74685-33-9 | 3-eicosene, (e)-                                                  |                     |       |
| 89    | 74810-41-6 | cyclohexane, (2-ethyl-1-methylbutylidene)-                        |                     |       |
| 89    | 74810-42-7 | cyclohexane, (2-ethyl-1-methyl-1-butenyl)-                        |                     |       |
| 89    | 7524-63-2  | 2,6-DIMETHYLTETRALINE                                             |                     |       |
| 89    | 754-43-8   | 2-Bromo-1,1,1,3,3,3-hexafluoro-2-(trifluoromethyl)propane         |                     |       |
| 89    | 762-42-5   | 2-Butyenedioic acid, dimethyl ester                               |                     |       |
| 89    | 78-67-1    | Azobisisobutyronitrile                                            |                     |       |
| 89    | 78-77-3    | 1-Bromo-2-methylpropane                                           |                     |       |
| 89    | 79-03-8    | Propanoyl chloride                                                |                     |       |
| 89    | 80655-44-3 | Decahydro-4,4,8,9,10-pentamethylnaphthalene                       |                     |       |
| 89    | 82253-11-0 | 7-octylidenebicyclo[4.1.0]heptane                                 |                     |       |
| 89    | 823-17-6   | Cyclohexene, 3,5-dimethyl-                                        |                     |       |
| 89    | 824-43-1   | (1R,2S)-1,2-Diethylcyclohexane                                    |                     |       |
| 89    | 825-44-5   | Benzo(b)thiophene 1,1-dioxide                                     |                     |       |
| 89    | 82736-95-6 | 1,2,4-Triazine-3,5(2H,4H)-dione, 6-fluoro-                        |                     |       |
| 89    | 829-20-9   | 1-(2,4-Dimethoxyphenyl)ethan-1-one                                |                     |       |
| 89    | 83173-76-6 | Benzenemethanol, 4-methyl-à-(1-methyl-2-propenyl)-, (R*,R*)-      |                     |       |
| 89    | 85763-57-1 | 11-Methyldodecanol                                                |                     |       |
| 89    | 866-23-9   | Phosphonic acid, trichloromethyl-, diethyl ester                  |                     |       |
| 89    | 871-83-0   | 2-Methylnonane                                                    |                     |       |
| 89    | 874-41-9   | 1,3-Dimethyl-4-ethylbenzene                                       |                     |       |
| 89    | 89656-98-4 | Cyclohexane, (2-methyl-1-propenyl)-                               |                     |       |
| 89    | 90565-51-8 | 2-butyl-4-methyl-1,6-dihydro-6-pyrimidone                         |                     |       |
| 89    | 90832-26-1 | 4,5-Dihydro-à,à,4,4-tetramethyl-1H-pyrazole-1-propanol            |                     |       |
| 89    | 90921-72-5 | N-Allyl-p-hydroxybenzamide                                        |                     |       |
| 89    | 91-17-8    | Decalin                                                           |                     |       |
| 89    | 91242-57-8 | Cyclopentane, 1,2-dipropyl-                                       |                     |       |
| 89    | 92-51-3    | Dicyclohexyl                                                      |                     |       |
| 89    | 925-60-0   | 2-Propenoic acid, propyl ester                                    |                     |       |
| 89    | 931-36-2   | 2-Ethyl-4-methyl-1H-imidazole                                     |                     |       |
| 89    | 932-40-1   | trans-1,2-Diethyl cyclopentane                                    |                     |       |
| 89    | 94492-10-1 | 2-Dimethylamino-4-methyl-pent-4-enenitrile                        |                     |       |
| 89    | 95-65-8    | 3,4-Dimethylphenol                                                |                     |       |
| 89    | 96-76-4    | 2,4-Di-tert-butylphenol                                           |                     |       |
| 89    | 97-72-3    | Isobutyric anhydride                                              |                     |       |
| 89    | 98060-54-9 | Decane, trimethyl-                                                |                     |       |
| 89    | 99133-89-8 | 4-Imidazolacetic acid, butyl ester                                |                     |       |
| 90    | 7440-09-7  | Potassium                                                         | 91.92               | mg/L  |
| 90    | 14127-61-8 | Calcium ion                                                       | 2385.31             | mg/L  |
| 90    | 14808-79-8 | Sulfate                                                           | 98.84               | mg/L  |
| 90    | 15438-31-0 | Fe +2 ion                                                         | 56.11               | mg/L  |
| 90    | 16887-00-6 | Chloride                                                          | 38414.67            | mg/L  |
| 90    | 17341-25-2 | Sodium ion                                                        | 23548.9             | mg/L  |
| 90    | 24959-67-9 | Bromide                                                           | 325.21              | mg/L  |
| 90    | 7439-95-4  | Magnesium                                                         | 411.68              | mg/L  |
| 90    | 7440-24-6  | Strontium                                                         | 1013.25             | mg/L  |
| 90    | 7440-39-3  | Barium                                                            | 4225.49             | mg/L  |
| 91    | 7439-96-5  | Manganese                                                         |                     |       |
| 91    | 7440-38-2  | Arsenic                                                           |                     |       |
| 91    | 7440-39-3  | Barium                                                            |                     |       |
| 91    | 7440-47-3  | Chromium                                                          |                     |       |
| 91    | 7440-50-8  | Copper                                                            |                     |       |
| 92    | 120-12-7   | Anthracene                                                        | 0.0017              | mg/L  |
| 92    | 129-00-0   | Pyrene                                                            |                     |       |

SI Table 4a: 1198 chemicals reported as being detected in produced water, by reference

| Refid | CAS        | Name                 | Conc (Max reported) | Units |
|-------|------------|----------------------|---------------------|-------|
| 92    | 206-44-0   | Fluoranthene         |                     |       |
| 92    | 218-01-9   | Chrysene             |                     |       |
| 92    | 50-32-8    | Benzo(a)pyrene       | 0.0021              | mg/L  |
| 92    | 56-55-3    | Benz(a)anthracene    |                     |       |
| 92    | 85-01-8    | Phenanthrene         | 0.0683              | mg/L  |
| 92    | 86-73-7    | Fluorene             | 0.0407              | mg/L  |
| 92    | 91-20-3    | Naphthalene          | 0.359               | mg/L  |
| 93    | 7440-09-7  | Potassium            | 100                 | mg/L  |
| 93    | 14127-61-8 | Calcium ion          | 480                 | mg/L  |
| 93    | 15438-31-0 | Fe +2 ion            | 220                 | mg/L  |
| 93    | 16887-00-6 | Chloride             | 24800               | mg/L  |
| 93    | 17341-25-2 | Sodium ion           | 15300               | mg/L  |
| 93    | 24959-67-9 | Bromide              | 135                 | mg/L  |
| 93    | 7439-93-2  | Lithium              | 4.1                 | mg/L  |
| 93    | 7439-95-4  | Magnesium            | 290                 | mg/L  |
| 93    | 7440-21-3  | Silicon              | 12                  | mg/L  |
| 93    | 7440-39-3  | Barium               | 190                 | mg/L  |
| 93    | 7440-42-8  | Boron                | 9.3                 | mg/L  |
| 94    | 7440-09-7  | Potassium            | 18                  | mg/L  |
| 94    | 14127-61-8 | Calcium ion          | 69                  | mg/L  |
| 94    | 14808-79-8 | Sulfate              | 17                  | mg/L  |
| 94    | 15438-31-0 | Fe +2 ion            | 27                  | mg/L  |
| 94    | 16887-00-6 | Chloride             | 64                  | mg/L  |
| 94    | 16984-48-8 | Fluoride             | 1.7                 | mg/L  |
| 94    | 17341-25-2 | Sodium ion           | 800                 | mg/L  |
| 94    | 22537-38-8 | Rubidium, ion (Rb1+) | 0.038               | mg/L  |
| 94    | 24959-67-9 | Bromide              | 12                  | mg/L  |
| 94    | 7439-92-1  | Lead                 | 0.00043             | mg/L  |
| 94    | 7439-93-2  | Lithium              | 0.208               | mg/L  |
| 94    | 7439-95-4  | Magnesium            | 46                  | mg/L  |
| 94    | 7439-96-5  | Manganese            | 0.101               | mg/L  |
| 94    | 7439-97-6  | Mercury              | 0.00025             | mg/L  |
| 94    | 7440-02-0  | Nickel               | 0.035               | mg/L  |
| 94    | 7440-20-2  | Scandium             | 0.003               | mg/L  |
| 94    | 7440-21-3  | Silicon              | 7.1                 | mg/L  |
| 94    | 7440-24-6  | Strontium            | 1.9                 | mg/L  |
| 94    | 7440-28-0  | Thallium             | 0.00034             | mg/L  |
| 94    | 7440-31-5  | Tin                  | 0.0055              | mg/L  |
| 94    | 7440-38-2  | Arsenic              | 0.0026              | mg/L  |
| 94    | 7440-39-3  | Barium               | 1.6                 | mg/L  |
| 94    | 7440-42-8  | Boron                | 0.217               | mg/L  |
| 94    | 7440-46-2  | Cesium               | 0.00078             | mg/L  |
| 94    | 7440-47-3  | Chromium             | 0.0012              | mg/L  |
| 94    | 7440-48-4  | Cobalt               | 0.00022             | mg/L  |
| 94    | 7440-50-8  | Copper               | 0.029               | mg/L  |
| 94    | 7440-62-2  | Vanadium             | 0.00019             | mg/L  |
| 94    | 7440-66-6  | Zinc                 | 0.08                | mg/L  |
| 94    | 7440-69-9  | Bismuth              | 0.032               | mg/L  |
| 94    | 7664-41-7  | Ammonia              | 5.3                 | mg/L  |
| 94    | 7723-14-0  | Phosphorus           | 0.094               | mg/L  |
| 95    | 10045-97-3 | Caesium-137          |                     |       |
| 95    | 10098-97-2 | Strontium-90         |                     |       |
| 95    | 10198-40-0 | Cobalt 60            |                     |       |
| 95    | 13966-00-2 | Potassium-40         |                     |       |
| 95    | 13966-02-4 | Beryllium-7          |                     |       |
| 95    | 13967-63-0 | Scandium-46          |                     |       |
| 95    | 13982-63-3 | Radium-226           |                     |       |
| 95    | 14158-27-1 | Strontium-89         |                     |       |
| 95    | 14255-04-0 | Lead-210             |                     |       |
| 95    | 14274-82-9 | Thorium 228          |                     |       |
| 95    | 14733-03-0 | Bismuth-214          |                     |       |
| 95    | 14913-49-6 | Bismuth-212          |                     |       |
| 95    | 14913-50-9 | Thallium-208         |                     |       |
| 95    | 15067-28-4 | Lead-214             |                     |       |
| 95    | 15117-96-1 | Uranium-235          |                     |       |
| 95    | 15262-20-1 | Radium-228           |                     |       |
| 96    | 7440-09-7  | Potassium            | 526                 | mg/L  |
| 96    | 14127-61-8 | Calcium ion          | 546                 | mg/L  |
| 96    | 16887-00-6 | Chloride             | 20215               | mg/L  |
| 96    | 17341-25-2 | Sodium ion           | 9921                | mg/L  |
| 96    | 24959-67-9 | Bromide              | 227                 | mg/L  |
| 96    | 7439-93-2  | Lithium              | 7.88                | mg/L  |

SI Table 4a: 1198 chemicals reported as being detected in produced water, by reference

| Refid | CAS         | Name                                                | Conc (Max reported) | Units |
|-------|-------------|-----------------------------------------------------|---------------------|-------|
| 96    | 7439-95-4   | Magnesium                                           | 70.5                | mg/L  |
| 96    | 7440-21-3   | Silicon                                             | 25.7                | mg/L  |
| 96    | 7440-24-6   | Strontium                                           | 72.5                | mg/L  |
| 96    | 7440-39-3   | Barium                                              | 38.1                | mg/L  |
| 96    | 7440-42-8   | Boron                                               | 22.8                | mg/L  |
| 96    | 7704-34-9   | Sulfur                                              | 10.6                | mg/L  |
| 96    | 7723-14-0   | Phosphorus                                          | 1.46                | mg/L  |
| 97    | 7440-09-7   | Potassium                                           | 48.4                | mg/L  |
| 97    | 100-41-4    | Ethylbenzene                                        | 0.074               | mg/L  |
| 97    | 10098-97-2  | Strontium-90                                        | 70.7                | pCi/L |
| 97    | 108-88-3    | Toluene                                             | 0.152               | mg/L  |
| 97    | 1330-20-7   | Xylenes                                             | 0.017               | mg/L  |
| 97    | 13982-63-3  | Radium-226                                          | 4.5                 | pCi/L |
| 97    | 15262-20-1  | Radium-228                                          | 8.6                 | pCi/L |
| 97    | 16887-00-6  | Chloride                                            | 1500                | mg/L  |
| 97    | 16984-48-8  | Fluoride                                            | 0.94                | mg/L  |
| 97    | 471-34-1    | Carbonic acid calcium salt (1:1)                    | 17000               | mg/L  |
| 97    | 71-43-2     | Benzene                                             | 0.072               | mg/L  |
| 97    | 7439-89-6   | Iron                                                | 4.2                 | mg/L  |
| 97    | 7439-92-1   | Lead                                                | 0.27                | mg/L  |
| 97    | 7439-95-4   | Magnesium                                           | 33.9                | mg/L  |
| 97    | 7440-23-5   | Sodium                                              | 6532                | mg/L  |
| 97    | 7440-38-2   | Arsenic                                             | 0.011               | mg/L  |
| 97    | 7440-39-3   | Barium                                              | 61.9                | mg/L  |
| 97    | 7440-42-8   | Boron                                               | 2                   | mg/L  |
| 97    | 7440-66-6   | Zinc                                                | 0.39                | mg/L  |
| 97    | 7440-70-2   | Calcium                                             | 56.1                | mg/L  |
| 97    | 7782-49-2   | Selenium                                            | 0.001               | mg/L  |
| 98    | 7440-09-7   | Potassium                                           | 54.7                | mg/L  |
| 98    | 13982-63-3  | Radium-226                                          | 85.13513514         | pCi/L |
| 98    | 14127-61-8  | Calcium ion                                         | 266.9               | mg/L  |
| 98    | 14255-04-0  | Lead-210                                            | 1.162162162         | pCi/L |
| 98    | 14808-79-8  | Sulfate                                             | 74.9                | mg/L  |
| 98    | 16887-00-6  | Chloride                                            | 11650               | mg/L  |
| 98    | 17341-25-2  | Sodium ion                                          | 6934                | mg/L  |
| 98    | 24959-67-9  | Bromide                                             | 168.5               | mg/L  |
| 98    | 71-52-3     | Bicarbonate                                         | 1303                | mg/L  |
| 98    | 7429-90-5   | Aluminum                                            | 3.3                 | mg/L  |
| 98    | 7439-89-6   | Iron                                                | 69.3                | mg/L  |
| 98    | 7439-95-4   | Magnesium                                           | 38.4                | mg/L  |
| 98    | 7439-96-5   | Manganese                                           | 0.97                | mg/L  |
| 98    | 7440-21-3   | Silicon                                             | 48.8                | mg/L  |
| 98    | 7440-24-6   | Strontium                                           | 40                  | mg/L  |
| 98    | 7440-39-3   | Barium                                              | 14.2                | mg/L  |
| 99    | 100-41-4    | Ethylbenzene                                        | 1.54                | mg/L  |
| 99    | 100-42-5    | Styrene                                             | 0.0359              | mg/L  |
| 99    | 103-65-1    | Propylbenzene                                       | 0.465               | mg/L  |
| 99    | 104-51-8    | Butylbenzene                                        | 0.0735              | mg/L  |
| 99    | 108-10-1    | 4-Methyl-2-pentanone                                | 1.44                | mg/L  |
| 99    | 108-67-8    | 1,3,5-Trimethylbenzene                              | 0.73                | mg/L  |
| 99    | 108-88-3    | Toluene                                             | 41.5                | mg/L  |
| 99    | 122-20-3    | Triisopropanolamine                                 |                     |       |
| 99    | 135-98-8    | sec-Butylbenzene                                    | 2.02                | mg/L  |
| 99    | 179601-23-1 | m,p-Xylene                                          | 52.5                | mg/L  |
| 99    | 591-78-6    | 2-Hexanone                                          | 1.07                | mg/L  |
| 99    | 67-64-1     | Acetone                                             | 21.7                | mg/L  |
| 99    | 71-43-2     | Benzene                                             | 12.5                | mg/L  |
| 99    | 78-93-3     | Methyl ethyl ketone                                 | 0.199               | mg/L  |
| 99    | 95-47-6     | o-Xylene                                            | 20.5                | mg/L  |
| 99    | 95-63-6     | 1,2,4-Trimethylbenzene                              | 2.29                | mg/L  |
| 99    | 98-06-6     | tert-Butylbenzene                                   | 0.256               | mg/L  |
| 99    | 99-87-6     | p-Cymene                                            | 0.0906              | mg/L  |
| 100   | 7440-09-7   | Potassium                                           | 75.9                | mg/L  |
| 100   | 14265-44-2  | Phosphate                                           | 7.2                 | mg/L  |
| 100   | 14808-79-8  | Sulfate                                             | 26.63               | mg/L  |
| 100   | 16887-00-6  | Chloride                                            | 27103               | mg/L  |
| 100   | 24959-67-9  | Bromide                                             | 265.1               | mg/L  |
| 100   | 5579-66-8   | 3,6,9,12,15,18,21,24,27-Nonaoxanonacosane-1,29-diol |                     |       |
| 100   | 7439-89-6   | Iron                                                | 19                  | mg/L  |
| 100   | 7439-95-4   | Magnesium                                           | 130                 | mg/L  |
| 100   | 7439-96-5   | Manganese                                           | 89.9                | mg/L  |
| 100   | 7440-21-3   | Silicon                                             | 42                  | mg/L  |

SI Table 4a: 1198 chemicals reported as being detected in produced water, by reference

| Refid | CAS        | Name           | Conc (Max reported) | Units |
|-------|------------|----------------|---------------------|-------|
| 100   | 7440-23-5  | Sodium         | 14794               | mg/L  |
| 100   | 7440-24-6  | Strontium      | 202                 | mg/L  |
| 100   | 7440-39-3  | Barium         | 41.39               | mg/L  |
| 100   | 7440-70-2  | Calcium        | 1204.2              | mg/L  |
| 101   | 12587-46-1 | Alpha particle | 123000              | pCi/L |
| 101   | 12587-47-2 | Beta particle  | 12000               | pCi/L |
| 101   | 13982-63-3 | Radium-226     | 16920               | pCi/L |
| 101   | 15262-20-1 | Radium-228     | 2589                | pCi/L |
| 101   | 7440-14-4  | Radium         | 18045               | pCi/L |
| 102   | 7440-09-7  | Potassium      | 1210                | mg/L  |
| 102   | 14701-22-5 | Nickel cation  | 19.2                | mg/L  |
| 102   | 14808-79-8 | Sulfate        | 774                 | mg/L  |
| 102   | 16887-00-6 | Chloride       | 184000              | mg/L  |
| 102   | 24959-67-9 | Bromide        | 1470                | mg/L  |
| 102   | 71-52-3    | Bicarbonate    | 364                 | mg/L  |
| 102   | 7439-89-6  | Iron           | 519                 | mg/L  |
| 102   | 7439-92-1  | Lead           | 1.09                | mg/L  |
| 102   | 7439-93-2  | Lithium        | 282                 | mg/L  |
| 102   | 7439-95-4  | Magnesium      | 3670                | mg/L  |
| 102   | 7439-96-5  | Manganese      | 26.6                | mg/L  |
| 102   | 7440-17-7  | Rubidium       | 1.39                | mg/L  |
| 102   | 7440-23-5  | Sodium         | 63100               | mg/L  |
| 102   | 7440-24-6  | Strontium      | 10300               | mg/L  |
| 102   | 7440-39-3  | Barium         | 22400               | mg/L  |
| 102   | 7440-42-8  | Boron          | 47.3                | mg/L  |
| 102   | 7440-46-2  | Cesium         | 0.358               | mg/L  |
| 102   | 7440-48-4  | Cobalt         | 0.039               | mg/L  |
| 102   | 7440-50-8  | Copper         | 1.57                | mg/L  |
| 102   | 7440-66-6  | Zinc           | 2.17                | mg/L  |
| 102   | 7440-70-2  | Calcium        | 39200               | mg/L  |
| 102   | 7553-56-2  | Iodine         | 29.9                | mg/L  |
| 103   | 7440-09-7  | Potassium      | 27.91               | mg/L  |
| 103   | 14797-55-8 | Nitrate        | 1.9                 | mg/L  |
| 103   | 14808-79-8 | Sulfate        | 123.35              | mg/L  |
| 103   | 16887-00-6 | Chloride       | 12717               | mg/L  |
| 103   | 7439-89-6  | Iron           | 0.08                | mg/L  |
| 103   | 7439-92-1  | Lead           | 0.03                | mg/L  |
| 103   | 7439-95-4  | Magnesium      | 35.07               | mg/L  |
| 103   | 7440-23-5  | Sodium         | 7602                | mg/L  |
| 103   | 7440-39-3  | Barium         | 3.36                | mg/L  |
| 103   | 7440-42-8  | Boron          | 14.8                | mg/L  |
| 103   | 7440-70-2  | Calcium        | 169.12              | mg/L  |
| 103   | 7782-49-2  | Selenium       | 0.202               | mg/L  |
| 104   | 14797-55-8 | Nitrate        | 2.25                | mg/L  |
| 104   | 14808-79-8 | Sulfate        | 69.95               | mg/L  |
| 104   | 16887-00-6 | Chloride       | 20606               | mg/L  |
| 104   | 17341-25-2 | Sodium ion     | 8769                | mg/L  |
| 104   | 7439-89-6  | Iron           | 5                   | mg/L  |
| 104   | 7440-39-3  | Barium         | 49                  | mg/L  |
| 104   | 7440-42-8  | Boron          | 123                 | mg/L  |
| 104   | 7440-70-2  | Calcium        | 1038                | mg/L  |
| 104   | 7631-86-9  | Silica         | 185                 | mg/L  |
| 104   | 7664-41-7  | Ammonia        | 0.4                 | mg/L  |
| 104   | 7723-14-0  | Phosphorus     | 1.19                | mg/L  |
| 105   | 24959-67-9 | Bromide        | 1120                | mg/L  |
| 105   | 7439-89-6  | Iron           | 370                 | mg/L  |
| 105   | 7439-92-1  | Lead           | 31.4                | mg/L  |
| 105   | 7439-96-5  | Manganese      | 62                  | mg/L  |
| 105   | 7439-98-7  | Molybdenum     | 0.05                | mg/L  |
| 105   | 7440-22-4  | Silver         | 0.009               | mg/L  |
| 105   | 7440-24-6  | Strontium      | 1600                | mg/L  |
| 105   | 7440-28-0  | Thallium       | 0.21                | mg/L  |
| 105   | 7440-38-2  | Arsenic        | 0.35                | mg/L  |
| 105   | 7440-42-8  | Boron          | 180                 | mg/L  |
| 105   | 7440-43-9  | Cadmium        | 0.82                | mg/L  |
| 105   | 7440-46-2  | Cesium         | 0.58                | mg/L  |
| 105   | 7440-48-4  | Cobalt         | 0.22                | mg/L  |
| 105   | 7440-50-8  | Copper         | 0.37                | mg/L  |
| 105   | 7440-57-5  | Gold           | 0.018               | mg/L  |
| 105   | 7440-61-1  | Uranium        | 0.09                | mg/L  |
| 105   | 7440-66-6  | Zinc           | 174                 | mg/L  |
| 106   | 7440-09-7  | Potassium      | 1050                | mg/L  |

SI Table 4a: 1198 chemicals reported as being detected in produced water, by reference

| Refid | CAS        | Name                       | Conc (Max reported) | Units |
|-------|------------|----------------------------|---------------------|-------|
| 106   | 7446-09-5  | Sulfur dioxide             | 0.03225             | mg/L  |
| 106   | 100-01-6   | 4-Nitroaniline             | 0.0026              | mg/L  |
| 106   | 100-41-4   | Ethylbenzene               | 0.00693             | mg/L  |
| 106   | 10045-97-3 | Caesium-137                | 9                   | pCi/L |
| 106   | 10098-97-2 | Strontium-90               | 0.44                | pCi/L |
| 106   | 104-76-7   | 2-Ethyl-1-hexanol          | 0.041               | mg/L  |
| 106   | 105-67-9   | 2,4-Dimethylphenol         | 0.00039             | mg/L  |
| 106   | 106-46-7   | 1,4-Dichlorobenzene        | 0.00034             | mg/L  |
| 106   | 107-21-1   | Ethylene glycol            | 290                 | mg/L  |
| 106   | 108-10-1   | 4-Methyl-2-pentanone       | 0.00065             | mg/L  |
| 106   | 108-38-3   | m-Xylene                   | 0.111               | mg/L  |
| 106   | 108-67-8   | 1,3,5-Trimethylbenzene     | 0.0034              | mg/L  |
| 106   | 108-88-3   | Toluene                    | 2.3                 | mg/L  |
| 106   | 108-95-2   | Phenol                     | 0.084               | mg/L  |
| 106   | 110-86-1   | Pyridine                   | 0.28                | mg/L  |
| 106   | 1120-21-4  | Undecane                   | 0.0113              | mg/L  |
| 106   | 112-30-1   | 1-Decanol                  | 0.0054              | mg/L  |
| 106   | 112-40-3   | Dodecane                   | 0.0706              | mg/L  |
| 106   | 117-81-7   | Di(2-ethylhexyl) phthalate | 0.0091              | mg/L  |
| 106   | 117-84-0   | Di-n-octyl phthalate       | 0.0093              | mg/L  |
| 106   | 118-74-1   | Hexachlorobenzene          | 0.001               | mg/L  |
| 106   | 119-64-2   | Tetralin                   | 0.00895             | mg/L  |
| 106   | 120-82-1   | 1,2,4-Trichlorobenzene     | 0.0015              | mg/L  |
| 106   | 122-39-4   | Diphenylamine              | 0.0017              | mg/L  |
| 106   | 123-91-1   | 1,4-Dioxane                | 0.0095              | mg/L  |
| 106   | 124-38-9   | Carbon dioxide             | 0.29                | mg/L  |
| 106   | 12587-46-1 | Alpha particle             | 40880               | pCi/L |
| 106   | 12587-47-2 | Beta particle              | 216740.95           | pCi/L |
| 106   | 127-18-4   | Tetrachloroethylene        | 0.005               | mg/L  |
| 106   | 131-11-3   | Dimethyl phthalate         | 0.0015              | mg/L  |
| 106   | 1330-20-7  | Xylenes                    | 0.064               | mg/L  |
| 106   | 13966-00-2 | Potassium-40               | 700                 | pCi/L |
| 106   | 13966-29-5 | Uranium 234                | 22.1                | pCi/L |
| 106   | 13982-63-3 | Radium-226                 | 16920               | pCi/L |
| 106   | 14255-04-0 | Lead-210                   | 310                 | pCi/L |
| 106   | 14265-45-3 | Sulfite                    | 9.2                 | mg/L  |
| 106   | 14269-63-7 | Thorium 230                | 6.9                 | pCi/L |
| 106   | 14274-82-9 | Thorium 228                | 45.9                | pCi/L |
| 106   | 14331-83-0 | Actinium 228               | 1180                | pCi/L |
| 106   | 14331-85-2 | protactinium-231           | 240                 | pCi/L |
| 106   | 14733-03-0 | Bismuth-214                | 7330                | pCi/L |
| 106   | 14797-55-8 | Nitrate                    | 1.4                 | mg/L  |
| 106   | 14797-65-0 | Nitrite                    | 219                 | mg/L  |
| 106   | 14808-79-8 | Sulfate                    | 671                 | mg/L  |
| 106   | 14913-49-6 | Bismuth-212                | 150                 | pCi/L |
| 106   | 14913-50-9 | Thallium-208               | 0.4                 | pCi/L |
| 106   | 14952-40-0 | Actinium-227               | 2                   | pCi/L |
| 106   | 15065-10-8 | Thorium 234                | 170                 | pCi/L |
| 106   | 15067-28-4 | Lead-214                   | 7350                | pCi/L |
| 106   | 15092-94-1 | Lead-212                   | 54                  | pCi/L |
| 106   | 15100-28-4 | Protactinium-234           | 1400                | pCi/L |
| 106   | 15117-96-1 | Uranium-235                | 40                  | pCi/L |
| 106   | 15229-37-5 | Bismuth-211                | 2                   | pCi/L |
| 106   | 15262-20-1 | Radium-228                 | 3089                | pCi/L |
| 106   | 1560-97-0  | 2-Methyldodecane           | 0.0097              | mg/L  |
| 106   | 15623-45-7 | Radium-223                 | 2                   | pCi/L |
| 106   | 15623-47-9 | Thorium 227                | 3                   | pCi/L |
| 106   | 156-60-5   | (E)-1,2-Dichloroethylene   | 0.005               | mg/L  |
| 106   | 16065-83-1 | Chromium (III)             | 0.0447              | mg/L  |
| 106   | 16887-00-6 | Chloride                   | 192000              | mg/L  |
| 106   | 1718-52-1  | Perdeuteriopyrene          | 0.0011              | mg/L  |
| 106   | 17301-23-4 | 2,6-Dimethylundecane       | 0.2018              | mg/L  |
| 106   | 17312-57-1 | 3-Methyldodecane           | 0.0049              | mg/L  |
| 106   | 1758-88-9  | 2-Ethyl-p-xylene           | 0.3469              | mg/L  |
| 106   | 18496-25-8 | Sulfide                    | 4                   | mg/L  |
| 106   | 18540-29-9 | Chromium (VI) ion          | 5.4                 | mg/L  |
| 106   | 191-24-2   | Benzo(g,h,i)perylene       | 0.0012              | mg/L  |
| 106   | 193-39-5   | Indeno(1,2,3-cd)pyrene     | 0.0024              | mg/L  |
| 106   | 205-99-2   | Benzo(b)fluoranthene       | 0.001               | mg/L  |
| 106   | 206-44-0   | Fluoranthene               | 0.0013              | mg/L  |
| 106   | 207-08-9   | Benzo(k)fluoranthene       | 0.00091             | mg/L  |
| 106   | 218-01-9   | Chrysene                   | 0.0011              | mg/L  |

SI Table 4a: 1198 chemicals reported as being detected in produced water, by reference

| Refid | CAS        | Name                              | Conc (Max reported) | Units |
|-------|------------|-----------------------------------|---------------------|-------|
| 106   | 24959-67-9 | Bromide                           | 3340                | mg/L  |
| 106   | 25415-84-3 | Butanoic acid, 2-ethylhexyl ester | 0.0004              | mg/L  |
| 106   | 2658-24-4  | 2,2-Dimethylaziridine             | 0.0002              | mg/L  |
| 106   | 319-86-8   | delta-Hexachlorocyclohexane       | 0.000048            | mg/L  |
| 106   | 32038-83-8 | 2-Propynenitrile, 3-fluoro-       | 0.00018             | mg/L  |
| 106   | 496-11-7   | Indan                             | 0.0096              | mg/L  |
| 106   | 50-32-8    | Benzo(a)pyrene                    | 0.0011              | mg/L  |
| 106   | 53-70-3    | Dibenz(a,h)anthracene             | 0.0023              | mg/L  |
| 106   | 541-73-1   | 1,3-Dichlorobenzene               | 0.0003              | mg/L  |
| 106   | 56-55-3    | Benz(a)anthracene                 | 0.0012              | mg/L  |
| 106   | 57-12-5    | Cyanide                           | 0.1                 | mg/L  |
| 106   | 57-55-6    | 1,2-Propylene glycol              | 110                 | mg/L  |
| 106   | 59473-04-0 | Tox                               | 3.88                | mg/L  |
| 106   | 6032-29-7  | Pentan-2-ol                       | 0.0087              | mg/L  |
| 106   | 611-14-3   | 1-Ethyl-2-methylbenzene           | 0.0061              | mg/L  |
| 106   | 6117-97-1  | 4-Methyldodecane                  | 0.0101              | mg/L  |
| 106   | 629-50-5   | Tridecane                         | 0.0524              | mg/L  |
| 106   | 629-59-4   | Tetradecane                       | 0.016               | mg/L  |
| 106   | 64-17-5    | Ethanol                           | 0.5333              | mg/L  |
| 106   | 64-19-7    | Acetic acid                       | 6.6                 | mg/L  |
| 106   | 67-56-1    | Methanol                          | 428                 | mg/L  |
| 106   | 67-63-0    | Isopropanol                       | 83                  | mg/L  |
| 106   | 67-64-1    | Acetone                           | 0.21                | mg/L  |
| 106   | 700-12-9   | Benzene, pentamethyl-             | 0.2588              | mg/L  |
| 106   | 7045-71-8  | 2-Methylundecane                  | 0.0703              | mg/L  |
| 106   | 71-43-2    | Benzene                           | 1.345               | mg/L  |
| 106   | 7429-90-5  | Aluminum                          | 686                 | mg/L  |
| 106   | 7439-89-6  | Iron                              | 1390                | mg/L  |
| 106   | 7439-92-1  | Lead                              | 3.6                 | mg/L  |
| 106   | 7439-93-2  | Lithium                           | 633.925             | mg/L  |
| 106   | 7439-95-4  | Magnesium                         | 3670                | mg/L  |
| 106   | 7439-96-5  | Manganese                         | 48.5                | mg/L  |
| 106   | 7439-97-6  | Mercury                           | 0.0079              | mg/L  |
| 106   | 7439-98-7  | Molybdenum                        | 1.5                 | mg/L  |
| 106   | 7439-99-8  | Neptunium                         | 1640                | pCi/L |
| 106   | 7440-02-0  | Nickel                            | 3.2                 | mg/L  |
| 106   | 7440-21-3  | Silicon                           | 49.29               | mg/L  |
| 106   | 7440-22-4  | Silver                            | 0.093               | mg/L  |
| 106   | 7440-23-5  | Sodium                            | 81800               | mg/L  |
| 106   | 7440-24-6  | Strontium                         | 15400               | mg/L  |
| 106   | 7440-28-0  | Thallium                          | 0.0564              | mg/L  |
| 106   | 7440-29-1  | Thorium                           | 35.9                | mg/L  |
| 106   | 7440-31-5  | Tin                               | 0.052               | mg/L  |
| 106   | 7440-32-6  | Titanium                          | 0.148               | mg/L  |
| 106   | 7440-36-0  | Antimony                          | 0.0491              | mg/L  |
| 106   | 7440-38-2  | Arsenic                           | 1.1                 | mg/L  |
| 106   | 7440-39-3  | Barium                            | 15000               | mg/L  |
| 106   | 7440-41-7  | Beryllium                         | 0.0022              | mg/L  |
| 106   | 7440-42-8  | Boron                             | 94.7                | mg/L  |
| 106   | 7440-43-9  | Cadmium                           | 0.018               | mg/L  |
| 106   | 7440-44-0  | Carbon                            | 3750                | mg/L  |
| 106   | 7440-47-3  | Chromium                          | 2.2                 | mg/L  |
| 106   | 7440-48-4  | Cobalt                            | 2.36                | mg/L  |
| 106   | 7440-50-8  | Copper                            | 18                  | mg/L  |
| 106   | 7440-61-1  | Uranium                           | 170                 | pCi/L |
| 106   | 7440-66-6  | Zinc                              | 17.1                | mg/L  |
| 106   | 7440-70-2  | Calcium                           | 43400               | mg/L  |
| 106   | 74-87-3    | Chloromethane                     | 0.0054              | mg/L  |
| 106   | 75-09-2    | Dichloromethane                   | 0.0118              | mg/L  |
| 106   | 75163-97-2 | octadecane, 2,6-dimethyl-         | 0.2917              | mg/L  |
| 106   | 75-34-3    | 1,1-Dichloroethane                | 0.005               | mg/L  |
| 106   | 75-83-2    | 2,2-Dimethylbutane                | 0.00066             | mg/L  |
| 106   | 7631-86-9  | Silica                            | 36.5                | mg/L  |
| 106   | 7664-41-7  | Ammonia                           | 409                 | mg/L  |
| 106   | 7723-14-0  | Phosphorus                        | 4222                | mg/L  |
| 106   | 7727-37-9  | Nitrogen                          | 96026               | mg/L  |
| 106   | 7782-49-2  | Selenium                          | 0.17                | mg/L  |
| 106   | 78-93-3    | Methyl ethyl ketone               | 0.018               | mg/L  |
| 106   | 83-32-9    | Acenaphthene                      | 0.00029             | mg/L  |
| 106   | 84-66-2    | Diethyl phthalate                 | 0.0026              | mg/L  |
| 106   | 84-74-2    | Dibutyl phthalate                 | 0.0015              | mg/L  |
| 106   | 85-01-8    | Phenanthrene                      | 0.0013              | mg/L  |



SI Table 4a: 1198 chemicals reported as being detected in produced water, by reference

| Refid | CAS        | Name                      | Conc (Max reported) | Units |
|-------|------------|---------------------------|---------------------|-------|
| 106   | 86-30-6    | N-Nitrosodiphenylamine    | 0.0017              | mg/L  |
| 106   | 86-73-7    | Fluorene                  | 0.0014              | mg/L  |
| 106   | 87-61-6    | 1,2,3-Trichlorobenzene    | 0.0065              | mg/L  |
| 106   | 91-20-3    | Naphthalene               | 0.0028              | mg/L  |
| 106   | 91-57-6    | 2-Methylnaphthalene       | 0.00995             | mg/L  |
| 106   | 95-48-7    | o-Cresol                  | 0.00021             | mg/L  |
| 106   | 95-50-1    | 1,2-Dichlorobenzene       | 0.00068             | mg/L  |
| 106   | 95-63-6    | 1,2,4-Trimethylbenzene    | 0.0042              | mg/L  |
| 106   | 959-98-8   | Endosulfan I              | 0.0005              | mg/L  |
| 106   | 98-86-2    | Acetophenone              | 0.0011              | mg/L  |
| 107   | 7440-09-7  | Potassium                 | 173                 | mg/L  |
| 107   | 16887-00-6 | Chloride                  | 90292               | mg/L  |
| 107   | 7429-90-5  | Aluminum                  | 0.38                | mg/L  |
| 107   | 7439-89-6  | Iron                      | 45                  | mg/L  |
| 107   | 7439-92-1  | Lead                      | 1.5                 | mg/L  |
| 107   | 7439-95-4  | Magnesium                 | 2509                | mg/L  |
| 107   | 7440-23-5  | Sodium                    | 53381               | mg/L  |
| 107   | 7440-24-6  | Strontium                 | 291                 | mg/L  |
| 107   | 7440-39-3  | Barium                    | 396                 | mg/L  |
| 107   | 7440-66-6  | Zinc                      | 1.2                 | mg/L  |
| 107   | 7440-70-2  | Calcium                   | 10577               | mg/L  |
| 108   | 7440-09-7  | Potassium                 | 125.43              | mg/L  |
| 108   | 14808-79-8 | Sulfate                   | 1745.27             | mg/L  |
| 108   | 16887-00-6 | Chloride                  | 5885.37             | mg/L  |
| 108   | 71-52-3    | Bicarbonate               | 1189.1              | mg/L  |
| 108   | 7439-89-6  | Iron                      | 0.097               | mg/L  |
| 108   | 7439-95-4  | Magnesium                 | 330.52              | mg/L  |
| 108   | 7440-23-5  | Sodium                    | 2902.71             | mg/L  |
| 108   | 7440-42-8  | Boron                     | 31.6                | mg/L  |
| 108   | 7440-70-2  | Calcium                   | 1240.09             | mg/L  |
| 108   | 7631-86-9  | Silica                    | 172                 | mg/L  |
| 109   | 7440-09-7  | Potassium                 | 670                 | mg/L  |
| 109   | 100-41-4   | Ethylbenzene              | 0.016               | mg/L  |
| 109   | 100-42-5   | Styrene                   | 0.001               | mg/L  |
| 109   | 103-65-1   | Propylbenzene             | 0.007               | mg/L  |
| 109   | 104-51-8   | Butylbenzene              | 0.01                | mg/L  |
| 109   | 105-67-9   | 2,4-Dimethylphenol        | 0.008               | mg/L  |
| 109   | 106-42-3   | p-Xylene                  | 0.033               | mg/L  |
| 109   | 107-92-6   | Butanoic acid             | 1.776               | mg/L  |
| 109   | 108-38-3   | m-Xylene                  | 0.022               | mg/L  |
| 109   | 108-67-8   | 1,3,5-Trimethylbenzene    | 0.01                | mg/L  |
| 109   | 108-88-3   | Toluene                   | 0.202               | mg/L  |
| 109   | 110-75-8   | 2-Chloroethyl vinyl ether | 0.014               | mg/L  |
| 109   | 120-12-7   | Anthracene                | 0.001               | mg/L  |
| 109   | 142-62-1   | Hexanoic acid             | 0.216               | mg/L  |
| 109   | 14808-79-8 | Sulfate                   | 1.6                 | mg/L  |
| 109   | 16887-00-6 | Chloride                  | 103000              | mg/L  |
| 109   | 24959-67-9 | Bromide                   | 342                 | mg/L  |
| 109   | 503-74-2   | Isovaleric acid           | 0.96                | mg/L  |
| 109   | 64-19-7    | Acetic acid               | 6.48                | mg/L  |
| 109   | 646-07-1   | Pentanoic acid, 4-methyl- | 3.456               | mg/L  |
| 109   | 71-43-2    | Benzene                   | 0.531               | mg/L  |
| 109   | 7439-89-6  | Iron                      | 47.1                | mg/L  |
| 109   | 7439-93-2  | Lithium                   | 31.6                | mg/L  |
| 109   | 7439-95-4  | Magnesium                 | 2440                | mg/L  |
| 109   | 7439-96-5  | Manganese                 | 5.7                 | mg/L  |
| 109   | 7440-23-5  | Sodium                    | 50000               | mg/L  |
| 109   | 7440-24-6  | Strontium                 | 827                 | mg/L  |
| 109   | 7440-39-3  | Barium                    | 468                 | mg/L  |
| 109   | 7440-47-3  | Chromium                  | 0.03                | mg/L  |
| 109   | 7440-70-2  | Calcium                   | 10700               | mg/L  |
| 109   | 79-09-4    | Propionic acid            | 0.324               | mg/L  |
| 109   | 79-31-2    | 2-Methylpropanoic acid    | 0.384               | mg/L  |
| 109   | 79-34-5    | 1,1,2,2-Tetrachloroethane | 0.005               | mg/L  |
| 109   | 80-62-6    | Methyl methacrylate       | 0.03                | mg/L  |
| 109   | 90-12-0    | 1-Methylnaphthalene       | 0.003               | mg/L  |
| 109   | 91-20-3    | Naphthalene               | 0.025               | mg/L  |
| 109   | 95-47-6    | o-Xylene                  | 0.045               | mg/L  |
| 109   | 95-63-6    | 1,2,4-Trimethylbenzene    | 0.003               | mg/L  |
| 109   | 98-82-8    | Cumene                    | 0.064               | mg/L  |
| 109   | 98-95-3    | Nitrobenzene              | 0.006               | mg/L  |
| 109   | 99-87-6    | p-Cymene                  | 0.005               | mg/L  |
| 110   | 7440-09-7  | Potassium                 | 163                 | mg/L  |

SI Table 4a: 1198 chemicals reported as being detected in produced water, by reference

| Refid | CAS        | Name                             | Conc (Max reported) | Units |
|-------|------------|----------------------------------|---------------------|-------|
| 110   | 1120-21-4  | Undecane                         |                     |       |
| 110   | 112-40-3   | Dodecane                         |                     |       |
| 110   | 124-18-5   | Decane                           |                     |       |
| 110   | 14808-79-8 | Sulfate                          | 15.17               | mg/L  |
| 110   | 16887-00-6 | Chloride                         | 39579               | mg/L  |
| 110   | 24959-67-9 | Bromide                          | 428.2               | mg/L  |
| 110   | 295-17-0   | Cyclotetradecane                 |                     |       |
| 110   | 544-76-3   | Hexadecane                       |                     |       |
| 110   | 629-50-5   | Tridecane                        |                     |       |
| 110   | 629-59-4   | Tetradecane                      |                     |       |
| 110   | 7429-90-5  | Aluminum                         | 0.1366              | mg/L  |
| 110   | 7439-89-6  | Iron                             | 13.7                | mg/L  |
| 110   | 7439-92-1  | Lead                             | 0.0066              | mg/L  |
| 110   | 7439-93-2  | Lithium                          | 38                  | mg/L  |
| 110   | 7439-95-4  | Magnesium                        | 2.17                | mg/L  |
| 110   | 7439-96-5  | Manganese                        | 483                 | mg/L  |
| 110   | 7439-98-7  | Molybdenum                       | 0.02231             | mg/L  |
| 110   | 7440-02-0  | Nickel                           | 0.00992             | mg/L  |
| 110   | 7440-17-7  | Rubidium                         | 0.4501              | mg/L  |
| 110   | 7440-21-3  | Silicon                          | 27.6                | mg/L  |
| 110   | 7440-23-5  | Sodium                           | 18600               | mg/L  |
| 110   | 7440-24-6  | Strontium                        | 844                 | mg/L  |
| 110   | 7440-28-0  | Thallium                         | 0.00115             | mg/L  |
| 110   | 7440-29-1  | Thorium                          | 0.00511             | mg/L  |
| 110   | 7440-31-5  | Tin                              | 0.3341              | mg/L  |
| 110   | 7440-36-0  | Antimony                         | 0.00827             | mg/L  |
| 110   | 7440-38-2  | Arsenic                          | 0.04254             | mg/L  |
| 110   | 7440-39-3  | Barium                           | 861                 | mg/L  |
| 110   | 7440-43-9  | Cadmium                          | 0.0009              | mg/L  |
| 110   | 7440-46-2  | Cesium                           | 0.1226              | mg/L  |
| 110   | 7440-47-3  | Chromium                         | 0.00517             | mg/L  |
| 110   | 7440-48-4  | Cobalt                           | 0.0011              | mg/L  |
| 110   | 7440-50-8  | Copper                           | 0.1862              | mg/L  |
| 110   | 7440-58-6  | Hafnium                          | 0.00545             | mg/L  |
| 110   | 7440-61-1  | Uranium                          | 0.0012              | mg/L  |
| 110   | 7440-62-2  | Vanadium                         | 0.00211             | mg/L  |
| 110   | 7440-66-6  | Zinc                             | 1.01                | mg/L  |
| 110   | 7440-70-2  | Calcium                          | 4650                | mg/L  |
| 110   | 7723-14-0  | Phosphorus                       | 3.43                | mg/L  |
| 110   | 7782-49-2  | Selenium                         | 0.00767             | mg/L  |
| 111   | 14808-79-8 | Sulfate                          | 77                  | mg/L  |
| 111   | 7439-89-6  | Iron                             | 45                  | mg/L  |
| 112   | 14797-55-8 | Nitrate                          | 34.99               | mg/L  |
| 112   | 16887-00-6 | Chloride                         | 500                 | mg/L  |
| 112   | 16984-48-8 | Fluoride                         | 1.38                | mg/L  |
| 112   | 471-34-1   | Carbonic acid calcium salt (1:1) | 315                 | mg/L  |
| 112   | 7439-89-6  | Iron                             | 0.45                | mg/L  |
| 112   | 7439-95-4  | Magnesium                        | 41.92               | mg/L  |
| 112   | 7439-96-5  | Manganese                        | 2                   | mg/L  |
| 112   | 7440-23-5  | Sodium                           | 570                 | mg/L  |
| 112   | 7440-70-2  | Calcium                          | 57                  | mg/L  |
| 112   | 7553-56-2  | Iodine                           | 0.4                 | mg/L  |
| 114   | 7440-09-7  | Potassium                        | 1650                | mg/L  |
| 114   | 7783-06-4  | Hydrogen sulfide                 | 600                 | mg/L  |
| 114   | 14808-79-8 | Sulfate                          | 1750                | mg/L  |
| 114   | 16887-00-6 | Chloride                         | 122450              | mg/L  |
| 114   | 471-34-1   | Carbonic acid calcium salt (1:1) | 740                 | mg/L  |
| 114   | 7439-95-4  | Magnesium                        | 2160                | mg/L  |
| 114   | 7439-97-6  | Mercury                          | 0.0071              | mg/L  |
| 114   | 7440-22-4  | Silver                           | 0.02                | mg/L  |
| 114   | 7440-23-5  | Sodium                           | 59900               | mg/L  |
| 114   | 7440-39-3  | Barium                           | 0.3                 | mg/L  |
| 114   | 7440-47-3  | Chromium                         | 0.8                 | mg/L  |
| 114   | 7440-70-2  | Calcium                          | 1750                | mg/L  |
| 114   | 7723-14-0  | Phosphorus                       | 6                   | mg/L  |
| 114   | 7727-37-9  | Nitrogen                         | 30                  | mg/L  |
| 114   | 7782-49-2  | Selenium                         | 0.001               | mg/L  |
| 115   | 108-88-3   | Toluene                          |                     |       |
| 115   | 111-76-2   | 2-Butoxyethanol                  |                     |       |
| 115   | 112-18-5   | N,N-Dimethyldodecan-1-amine      |                     |       |
| 115   | 112-75-4   | N,N-Dimethyltetradecylamine      |                     |       |
| 115   | 14797-55-8 | Nitrate                          | 2670                | mg/L  |

SI Table 4a: 1198 chemicals reported as being detected in produced water, by reference

| Refid | CAS        | Name                       | Conc (Max reported) | Units |
|-------|------------|----------------------------|---------------------|-------|
| 115   | 14808-79-8 | Sulfate                    | 5590                | mg/L  |
| 115   | 16887-00-6 | Chloride                   | 216000              | mg/L  |
| 115   | 16984-48-8 | Fluoride                   | 33                  | mg/L  |
| 115   | 24959-67-9 | Bromide                    | 10600               | mg/L  |
| 115   | 7439-89-6  | Iron                       | 2838                | mg/L  |
| 115   | 7439-98-7  | Molybdenum                 | 5.06                | mg/L  |
| 115   | 7440-02-0  | Nickel                     | 4.78                | mg/L  |
| 115   | 7440-24-6  | Strontium                  | 1310                | mg/L  |
| 115   | 7440-32-6  | Titanium                   | 4.16                | mg/L  |
| 115   | 7440-39-3  | Barium                     | 4370                | mg/L  |
| 115   | 7440-41-7  | Beryllium                  | 0.266               | mg/L  |
| 115   | 7440-47-3  | Chromium                   | 2.33                | mg/L  |
| 115   | 7440-48-4  | Cobalt                     | 4.14                | mg/L  |
| 115   | 7440-50-8  | Copper                     | 15                  | mg/L  |
| 115   | 7440-62-2  | Vanadium                   | 4.51                | mg/L  |
| 115   | 7440-66-6  | Zinc                       | 20                  | mg/L  |
| 115   | 7440-67-7  | Zirconium                  | 8.76                | mg/L  |
| 115   | 74-87-3    | Chloromethane              |                     |       |
| 115   | 75-15-0    | Carbon disulfide           |                     |       |
| 115   | 95-47-6    | o-Xylene                   |                     |       |
| 116   | 7440-09-7  | Potassium                  | 1100                | mg/L  |
| 116   | 14127-61-8 | Calcium ion                | 23000               | mg/L  |
| 116   | 14808-79-8 | Sulfate                    | 1500                | mg/L  |
| 116   | 16887-00-6 | Chloride                   | 157000              | mg/L  |
| 116   | 17341-25-2 | Sodium ion                 | 54000               | mg/L  |
| 116   | 18496-25-8 | Sulfide                    | 7700                | mg/L  |
| 116   | 24959-67-9 | Bromide                    | 1820                | mg/L  |
| 116   | 71-52-3    | Bicarbonate                | 160                 | mg/L  |
| 116   | 7439-89-6  | Iron                       | 120                 | mg/L  |
| 116   | 7439-93-2  | Lithium                    | 369                 | mg/L  |
| 116   | 7439-95-4  | Magnesium                  | 1950                | mg/L  |
| 116   | 7439-96-5  | Manganese                  | 53                  | mg/L  |
| 116   | 7440-39-3  | Barium                     | 9700                | mg/L  |
| 116   | 7440-48-4  | Cobalt                     | 8.2                 | mg/L  |
| 117   | 25322-69-4 | Polypropylene glycol       |                     |       |
| 118   | 25322-68-3 | Polyethylene glycol        |                     |       |
| 118   | 25322-69-4 | Polypropylene glycol       |                     |       |
| 119   | 7440-09-7  | Potassium                  |                     |       |
| 119   | 100-41-4   | Ethylbenzene               |                     |       |
| 119   | 100-51-6   | Benzyl alcohol             |                     |       |
| 119   | 104-51-8   | Butylbenzene               |                     |       |
| 119   | 105-67-9   | 2,4-Dimethylphenol         |                     |       |
| 119   | 106-44-5   | p-Cresol                   |                     |       |
| 119   | 107-92-6   | Butanoic acid              |                     |       |
| 119   | 108-39-4   | m-Cresol                   |                     |       |
| 119   | 108-67-8   | 1,3,5-Trimethylbenzene     |                     |       |
| 119   | 108-88-3   | Toluene                    |                     |       |
| 119   | 108-95-2   | Phenol                     |                     |       |
| 119   | 109-52-4   | Pentanoic acid             |                     |       |
| 119   | 110-86-1   | Pyridine                   |                     |       |
| 119   | 111-14-8   | Heptanoic acid             |                     |       |
| 119   | 117-81-7   | Di(2-ethylhexyl) phthalate |                     |       |
| 119   | 117-84-0   | Di-n-octyl phthalate       |                     |       |
| 119   | 123-91-1   | 1,4-Dioxane                |                     |       |
| 119   | 124-38-9   | Carbon dioxide             |                     |       |
| 119   | 128-39-2   | 2,6-Di-tert-butylphenol    |                     |       |
| 119   | 129-00-0   | Pyrene                     |                     |       |
| 119   | 1330-20-7  | Xylenes                    |                     |       |
| 119   | 13982-63-3 | Radium-226                 |                     |       |
| 119   | 142-62-1   | Hexanoic acid              |                     |       |
| 119   | 14797-55-8 | Nitrate                    |                     |       |
| 119   | 14797-65-0 | Nitrite                    |                     |       |
| 119   | 14808-79-8 | Sulfate                    |                     |       |
| 119   | 15262-20-1 | Radium-228                 |                     |       |
| 119   | 16887-00-6 | Chloride                   |                     |       |
| 119   | 16984-48-8 | Fluoride                   |                     |       |
| 119   | 18540-29-9 | Chromium (VI) ion          |                     |       |
| 119   | 191-24-2   | Benzo(g,h,i)perylene       |                     |       |
| 119   | 24959-67-9 | Bromide                    |                     |       |
| 119   | 503-74-2   | Isovaleric acid            |                     |       |
| 119   | 57-12-5    | Cyanide                    |                     |       |
| 119   | 64-18-6    | Formic acid                |                     |       |

SI Table 4a: 1198 chemicals reported as being detected in produced water, by reference

| Refid | CAS         | Name                   | Conc (Max reported) | Units |
|-------|-------------|------------------------|---------------------|-------|
| 119   | 64-19-7     | Acetic acid            |                     |       |
| 119   | 67-64-1     | Acetone                |                     |       |
| 119   | 67-66-3     | Chloroform             |                     |       |
| 119   | 71-43-2     | Benzene                |                     |       |
| 119   | 7429-90-5   | Aluminum               |                     |       |
| 119   | 7439-89-6   | Iron                   |                     |       |
| 119   | 7439-92-1   | Lead                   |                     |       |
| 119   | 7439-93-2   | Lithium                |                     |       |
| 119   | 7439-95-4   | Magnesium              |                     |       |
| 119   | 7439-96-5   | Manganese              |                     |       |
| 119   | 7439-97-6   | Mercury                |                     |       |
| 119   | 7439-98-7   | Molybdenum             |                     |       |
| 119   | 7440-02-0   | Nickel                 |                     |       |
| 119   | 7440-21-3   | Silicon                |                     |       |
| 119   | 7440-22-4   | Silver                 |                     |       |
| 119   | 7440-23-5   | Sodium                 |                     |       |
| 119   | 7440-24-6   | Strontium              |                     |       |
| 119   | 7440-28-0   | Thallium               |                     |       |
| 119   | 7440-31-5   | Tin                    |                     |       |
| 119   | 7440-32-6   | Titanium               |                     |       |
| 119   | 7440-36-0   | Antimony               |                     |       |
| 119   | 7440-38-2   | Arsenic                |                     |       |
| 119   | 7440-39-3   | Barium                 |                     |       |
| 119   | 7440-41-7   | Beryllium              |                     |       |
| 119   | 7440-42-8   | Boron                  |                     |       |
| 119   | 7440-43-9   | Cadmium                |                     |       |
| 119   | 7440-47-3   | Chromium               |                     |       |
| 119   | 7440-48-4   | Cobalt                 |                     |       |
| 119   | 7440-50-8   | Copper                 |                     |       |
| 119   | 7440-62-2   | Vanadium               |                     |       |
| 119   | 7440-66-6   | Zinc                   |                     |       |
| 119   | 7440-67-7   | Zirconium              |                     |       |
| 119   | 7440-70-2   | Calcium                |                     |       |
| 119   | 74-87-3     | Chloromethane          |                     |       |
| 119   | 75-09-2     | Dichloromethane        |                     |       |
| 119   | 75-25-2     | Bromoform              |                     |       |
| 119   | 7631-86-9   | Silica                 |                     |       |
| 119   | 7664-41-7   | Ammonia                |                     |       |
| 119   | 7782-49-2   | Selenium               |                     |       |
| 119   | 78-93-3     | Methyl ethyl ketone    |                     |       |
| 119   | 79-09-4     | Propionic acid         |                     |       |
| 119   | 79-31-2     | 2-Methylpropanoic acid |                     |       |
| 119   | 84-74-2     | Dibutyl phthalate      |                     |       |
| 119   | 85-01-8     | Phenanthrene           |                     |       |
| 119   | 86-30-6     | N-Nitrosodiphenylamine |                     |       |
| 119   | 86-73-7     | Fluorene               |                     |       |
| 119   | 91-20-3     | Naphthalene            |                     |       |
| 119   | 91-57-6     | 2-Methylnaphthalene    |                     |       |
| 119   | 95-48-7     | o-Cresol               |                     |       |
| 119   | 95-63-6     | 1,2,4-Trimethylbenzene |                     |       |
| 119   | 99-87-6     | p-Cymene               |                     |       |
| 119   | NOCAS_24858 | m,p-Cresol mixture     |                     |       |
| 120   | 14127-61-8  | Calcium ion            | 6360                | mg/L  |
| 120   | 14808-79-8  | Sulfate                | 71.5                | mg/L  |
| 120   | 16887-00-6  | Chloride               | 37600               | mg/L  |
| 120   | 17341-25-2  | Sodium ion             | 18300               | mg/L  |
| 120   | 7439-89-6   | Iron                   | 18.3                | mg/L  |
| 120   | 7439-95-4   | Magnesium              | 449                 | mg/L  |
| 120   | 7439-96-5   | Manganese              | 2                   | mg/L  |
| 120   | 7440-24-6   | Strontium              | 1051.3              | mg/L  |
| 120   | 7440-39-3   | Barium                 | 62.5                | mg/L  |
| 121   | 14808-79-8  | Sulfate                | 66.53               | mg/L  |
| 121   | 15438-31-0  | Fe +2 ion              | 4.22                | mg/L  |
| 121   | 16887-00-6  | Chloride               | 33000               | mg/L  |
| 121   | 17341-25-2  | Sodium ion             | 17060               | mg/L  |
| 121   | 7439-95-4   | Magnesium              | 373                 | mg/L  |
| 121   | 7440-24-6   | Strontium              | 1051                | mg/L  |
| 121   | 7440-39-3   | Barium                 | 1386                | mg/L  |
| 121   | 7440-70-2   | Calcium                | 3688                | mg/L  |
| 122   | 14127-61-8  | Calcium ion            | 37000               | mg/L  |
| 122   | 16887-00-6  | Chloride               | 162400              | mg/L  |
| 122   | 17341-25-2  | Sodium ion             | 64000               | mg/L  |

SI Table 4a: 1198 chemicals reported as being detected in produced water, by reference

| Refid | CAS        | Name                       | Conc (Max reported) | Units |
|-------|------------|----------------------------|---------------------|-------|
| 122   | 24959-67-9 | Bromide                    | 1900                | mg/L  |
| 122   | 7439-93-2  | Lithium                    | 139                 | mg/L  |
| 122   | 7439-95-4  | Magnesium                  | 6000                | mg/L  |
| 122   | 7440-24-6  | Strontium                  | 5000                | mg/L  |
| 122   | 7440-39-3  | Barium                     | 3100                | mg/L  |
| 122   | 7440-42-8  | Boron                      | 62.6                | mg/L  |
| 123   | 13982-63-3 | Radium-226                 | 260                 | pCi/L |
| 123   | 14808-79-8 | Sulfate                    | 3                   | mg/L  |
| 123   | 15262-20-1 | Radium-228                 | 34                  | pCi/L |
| 123   | 16887-00-6 | Chloride                   | 12287               | mg/L  |
| 123   | 17341-25-2 | Sodium ion                 | 4607                | mg/L  |
| 123   | 24959-67-9 | Bromide                    | 144                 | mg/L  |
| 123   | 7439-89-6  | Iron                       | 13                  | mg/L  |
| 123   | 7439-93-2  | Lithium                    | 28.145              | mg/L  |
| 123   | 7439-95-4  | Magnesium                  | 75                  | mg/L  |
| 123   | 7439-96-5  | Manganese                  | 3                   | mg/L  |
| 123   | 7440-21-3  | Silicon                    | 160                 | mg/L  |
| 123   | 7440-24-6  | Strontium                  | 49                  | mg/L  |
| 123   | 7440-39-3  | Barium                     | 5                   | mg/L  |
| 123   | 7440-42-8  | Boron                      | 21.102              | mg/L  |
| 123   | 7440-70-2  | Calcium                    | 386                 | mg/L  |
| 124   | 7440-09-7  | Potassium                  | 2440                | mg/L  |
| 124   | 100-41-4   | Ethylbenzene               | 19.5                | mg/L  |
| 124   | 100-42-5   | Styrene                    | 0.119               | mg/L  |
| 124   | 100-51-6   | Benzyl alcohol             | 0.34                | mg/L  |
| 124   | 105-67-9   | 2,4-Dimethylphenol         | 0.36                | mg/L  |
| 124   | 106-44-5   | p-Cresol                   | 0.3                 | mg/L  |
| 124   | 108-88-3   | Toluene                    | 37.2                | mg/L  |
| 124   | 108-95-2   | Phenol                     | 0.77                | mg/L  |
| 124   | 112-40-3   | Dodecane                   | 2.33                | mg/L  |
| 124   | 112-95-8   | Eicosane                   | 0.222               | mg/L  |
| 124   | 117-81-7   | Di(2-ethylhexyl) phthalate | 0.042               | mg/L  |
| 124   | 124-18-5   | Decane                     | 2.67                | mg/L  |
| 124   | 132-65-0   | Dibenzothiophene           | 0.0144              | mg/L  |
| 124   | 1330-20-7  | Xylenes                    | 11                  | mg/L  |
| 124   | 16887-00-6 | Chloride                   | 200000              | mg/L  |
| 124   | 16984-48-8 | Fluoride                   | 4.6                 | mg/L  |
| 124   | 18496-25-8 | Sulfide                    | 6                   | mg/L  |
| 124   | 544-76-3   | Hexadecane                 | 0.601               | mg/L  |
| 124   | 593-45-3   | Octadecane                 | 0.28                | mg/L  |
| 124   | 629-59-4   | Tetradecane                | 0.948               | mg/L  |
| 124   | 629-97-0   | Docosane                   | 0.224               | mg/L  |
| 124   | 630-01-3   | Hexacosane                 | 0.0651              | mg/L  |
| 124   | 630-02-4   | Octacosane                 | 0.0387              | mg/L  |
| 124   | 638-68-6   | Triacontane                | 0.0131              | mg/L  |
| 124   | 646-31-1   | Tetracosane                | 0.112               | mg/L  |
| 124   | 65-85-0    | Benzoic acid               | 0.24                | mg/L  |
| 124   | 67-64-1    | Acetone                    | 16                  | mg/L  |
| 124   | 71-43-2    | Benzene                    | 27.5                | mg/L  |
| 124   | 7429-90-5  | Aluminum                   | 0.011               | mg/L  |
| 124   | 7439-89-6  | Iron                       | 0.34                | mg/L  |
| 124   | 7439-92-1  | Lead                       | 0.001               | mg/L  |
| 124   | 7439-93-2  | Lithium                    | 1230                | mg/L  |
| 124   | 7439-95-4  | Magnesium                  | 2.7                 | mg/L  |
| 124   | 7439-96-5  | Manganese                  | 0.065               | mg/L  |
| 124   | 7440-02-0  | Nickel                     | 0.00007             | mg/L  |
| 124   | 7440-21-3  | Silicon                    | 38.2                | mg/L  |
| 124   | 7440-22-4  | Silver                     | 0.000004            | mg/L  |
| 124   | 7440-23-5  | Sodium                     | 42.7                | mg/L  |
| 124   | 7440-24-6  | Strontium                  | 6340                | mg/L  |
| 124   | 7440-31-5  | Tin                        | 0.0032              | mg/L  |
| 124   | 7440-36-0  | Antimony                   | 0.00027             | mg/L  |
| 124   | 7440-38-2  | Arsenic                    | 0.0024              | mg/L  |
| 124   | 7440-39-3  | Barium                     | 0.86                | mg/L  |
| 124   | 7440-42-8  | Boron                      | 0.14                | mg/L  |
| 124   | 7440-47-3  | Chromium                   | 0.001               | mg/L  |
| 124   | 7440-62-2  | Vanadium                   | 0.0006              | mg/L  |
| 124   | 7440-66-6  | Zinc                       | 0.028               | mg/L  |
| 124   | 7440-70-2  | Calcium                    | 30                  | mg/L  |
| 124   | 7553-56-2  | Iodine                     | 34                  | mg/L  |
| 124   | 7664-41-7  | Ammonia                    | 350                 | mg/L  |
| 124   | 7704-34-9  | Sulfur                     | 112                 | mg/L  |

SI Table 4a: 1198 chemicals reported as being detected in produced water, by reference

| Refid | CAS         | Name                | Conc (Max reported) | Units |
|-------|-------------|---------------------|---------------------|-------|
| 124   | 7723-14-0   | Phosphorus          | 4.06                | mg/L  |
| 124   | 78-59-1     | Isophorone          | 0.015               | mg/L  |
| 124   | 78-93-3     | Methyl ethyl ketone | 0.51                | mg/L  |
| 124   | 79-01-6     | Trichloroethylene   | 2.68                | mg/L  |
| 124   | 83-32-9     | Acenaphthene        | 0.0023              | mg/L  |
| 124   | 84-74-2     | Dibutyl phthalate   | 0.0151              | mg/L  |
| 124   | 85-01-8     | Phenanthrene        | 0.034               | mg/L  |
| 124   | 91-20-3     | Naphthalene         | 0.12                | mg/L  |
| 124   | 91-57-6     | 2-Methylnaphthalene | 0.13                | mg/L  |
| 124   | 92-52-4     | Biphenyl            | 0.0242              | mg/L  |
| 124   | 95-48-7     | o-Cresol            | 0.56                | mg/L  |
| 124   | 99-87-6     | p-Cymene            | 0.16                | mg/L  |
| 125   | 13982-63-3  | Radium-226          | 2510                | pCi/L |
| 125   | 16887-00-6  | Chloride            | 66200               | mg/L  |
| 125   | 17341-25-2  | Sodium ion          | 28400               | mg/L  |
| 125   | 7440-39-3   | Barium              | 297                 | mg/L  |
| 126   | 13982-63-3  | Radium-226          | 833                 | pCi/L |
| 126   | 15262-20-1  | Radium-228          | 814.8648649         | pCi/L |
| 127   | 7440-09-7   | Potassium           | 260.06              | mg/L  |
| 127   | 100-41-4    | Ethylbenzene        | 52.52               | mg/L  |
| 127   | 100-42-5    | Styrene             | 10.85               | mg/L  |
| 127   | 108-88-3    | Toluene             | 621.71              | mg/L  |
| 127   | 14127-61-8  | Calcium ion         | 7269.23             | mg/L  |
| 127   | 14265-44-2  | Phosphate           | 8.03                | mg/L  |
| 127   | 14797-55-8  | Nitrate             | 0.02                | mg/L  |
| 127   | 14797-65-0  | Nitrite             | 0.06                | mg/L  |
| 127   | 14808-79-8  | Sulfate             | 38.7                | mg/L  |
| 127   | 16887-00-6  | Chloride            | 42683.1             | mg/L  |
| 127   | 179601-23-1 | m,p-Xylene          | 698.71              | mg/L  |
| 127   | 24959-67-9  | Bromide             | 465.96              | mg/L  |
| 127   | 71-43-2     | Benzene             | 149.59              | mg/L  |
| 127   | 7429-90-5   | Aluminum            | 1.4                 | mg/L  |
| 127   | 7439-89-6   | Iron                | 67.1                | mg/L  |
| 127   | 7439-92-1   | Lead                | 0.01                | mg/L  |
| 127   | 7439-95-4   | Magnesium           | 835                 | mg/L  |
| 127   | 7439-96-5   | Manganese           | 5.5                 | mg/L  |
| 127   | 7440-23-5   | Sodium              | 26202.31            | mg/L  |
| 127   | 7440-24-6   | Strontium           | 1365.38             | mg/L  |
| 127   | 7440-39-3   | Barium              | 514.68              | mg/L  |
| 127   | 7440-47-3   | Chromium            | 0.03                | mg/L  |
| 127   | 7440-66-6   | Zinc                | 0.1                 | mg/L  |
| 127   | 74-82-8     | Methane             | 3420.48             | mg/L  |
| 127   | 74-84-0     | Ethane              | 571.19              | mg/L  |
| 127   | 74-98-6     | Propane             | 86.92               | mg/L  |
| 127   | 7704-34-9   | Sulfur              | 36.16               | mg/L  |
| 127   | 7782-49-2   | Selenium            | 0.06                | mg/L  |
| 127   | 95-47-6     | o-Xylene            | 142.27              | mg/L  |
| 128   | 7440-09-7   | Potassium           | 488                 | mg/L  |
| 128   | 100-41-4    | Ethylbenzene        | 0.235               | mg/L  |
| 128   | 100-42-5    | Styrene             | 0.141               | mg/L  |
| 128   | 108-88-3    | Toluene             | 2.45                | mg/L  |
| 128   | 12587-46-1  | Alpha particle      | 20920               | pCi/L |
| 128   | 12587-47-2  | Beta particle       | 4664                | pCi/L |
| 128   | 13966-00-2  | Potassium-40        | 221                 | pCi/L |
| 128   | 13982-63-3  | Radium-226          | 1194                | pCi/L |
| 128   | 14127-61-8  | Calcium ion         | 19900               | mg/L  |
| 128   | 14265-44-2  | Phosphate           | 90                  | mg/L  |
| 128   | 14269-63-7  | Thorium 230         | 9.37                | pCi/L |
| 128   | 14274-82-9  | Thorium 228         | 2.35                | pCi/L |
| 128   | 14797-55-8  | Nitrate             | 0.3                 | mg/L  |
| 128   | 14797-65-0  | Nitrite             | 0.8                 | mg/L  |
| 128   | 14808-79-8  | Sulfate             | 108                 | mg/L  |
| 128   | 15262-20-1  | Radium-228          | 216                 | pCi/L |
| 128   | 16887-00-6  | Chloride            | 79000               | mg/L  |
| 128   | 179601-23-1 | m,p-Xylene          | 3.38                | mg/L  |
| 128   | 24959-67-9  | Bromide             | 970                 | mg/L  |
| 128   | 71-43-2     | Benzene             | 0.372               | mg/L  |
| 128   | 7429-90-5   | Aluminum            | 13.3                | mg/L  |
| 128   | 7439-89-6   | Iron                | 149                 | mg/L  |
| 128   | 7439-92-1   | Lead                | 0.1                 | mg/L  |
| 128   | 7439-95-4   | Magnesium           | 2260                | mg/L  |
| 128   | 7439-96-5   | Manganese           | 10.2                | mg/L  |

SI Table 4a: 1198 chemicals reported as being detected in produced water, by reference

| Refid | CAS        | Name      | Conc (Max reported) | Units |
|-------|------------|-----------|---------------------|-------|
| 128   | 7440-23-5  | Sodium    | 119000              | mg/L  |
| 128   | 7440-24-6  | Strontium | 4660                | mg/L  |
| 128   | 7440-29-1  | Thorium   | 0.38                | pCi/L |
| 128   | 7440-39-3  | Barium    | 2580                | mg/L  |
| 128   | 7440-47-3  | Chromium  | 0.14                | mg/L  |
| 128   | 7440-66-6  | Zinc      | 0.35                | mg/L  |
| 128   | 74-82-8    | Methane   | 10.5                | mg/L  |
| 128   | 74-84-0    | Ethane    | 2.73                | mg/L  |
| 128   | 74-98-6    | Propane   | 1.13                | mg/L  |
| 128   | 7782-49-2  | Selenium  | 0.34                | mg/L  |
| 128   | 95-47-6    | o-Xylene  | 0.673               | mg/L  |
| 129   | 14808-79-8 | Sulfate   |                     |       |
| 129   | 16887-00-6 | Chloride  |                     |       |
| 129   | 7439-89-6  | Iron      |                     |       |
| 129   | 7440-39-3  | Barium    |                     |       |

SI Table 4b: Reference IDs

| RefId | Citation                                                                                                                                                                                                                                                                                                                                                                                                                            |
|-------|-------------------------------------------------------------------------------------------------------------------------------------------------------------------------------------------------------------------------------------------------------------------------------------------------------------------------------------------------------------------------------------------------------------------------------------|
| 1     | Adkins, J., Cornell, L.A., Tanner, R.S., 1992. Microbial composition of carbonate petroleum reservoir fluids. <i>Geomicrobiology Journal</i> 10, 87–97. <a href="https://doi.org/10.1080/01490459209377909">https://doi.org/10.1080/01490459209377909</a>                                                                                                                                                                           |
| 2     | Akob, D.M., Cozzarelli, I.M., Dunlap, D.S., Rowan, E.L., Lorah, M.M., 2015. Organic and inorganic composition and microbiology of produced waters from Pennsylvania shale gas wells. <i>Applied Geochemistry</i> 60, 116–125. <a href="https://doi.org/10.1016/j.apgeochem.2015.04.011">https://doi.org/10.1016/j.apgeochem.2015.04.011</a>                                                                                         |
| 3     | Akyon, B., Stachler, E., Wei, N., Bibby, K., 2015. Microbial Mats as a Biological Treatment Approach for Saline Wastewaters: The Case of Produced Water from Hydraulic Fracturing. <i>Environmental Science &amp; Technology</i> 49, 6172–6180. <a href="https://doi.org/10.1021/es505142t">https://doi.org/10.1021/es505142t</a>                                                                                                   |
| 4     | Barbot, E., Vidic, N.S., Gregory, K.B., Vidic, R.D., 2013. Spatial and Temporal Correlation of Water Quality Parameters of Produced Waters from Devonian-Age Shale following Hydraulic Fracturing. <i>Environmental Science &amp; Technology</i> 47, 2562–2569. <a href="https://doi.org/10.1021/es304638h">https://doi.org/10.1021/es304638h</a>                                                                                   |
| 5     | Barnaby, R.J., Oetting, G.C., Gao, G., 2004. Strontium isotopic signatures of oil-field waters: Applications for reservoir characterization. <i>AAPG Bulletin</i> 88, 1677–1704. <a href="https://doi.org/10.1306/07130404002">https://doi.org/10.1306/07130404002</a>                                                                                                                                                              |
| 6     | Bell, E.A., Poynor, T.E., Newhart, K.B., Regnery, J., Coday, B.D., Cath, T.Y., 2017. Produced water treatment using forward osmosis membranes: Evaluation of extended-time performance and fouling. <i>Journal of Membrane Science</i> 525, 77–88. <a href="https://doi.org/10.1016/j.memsci.2016.10.032">https://doi.org/10.1016/j.memsci.2016.10.032</a>                                                                          |
| 7     | Bhupathiraju, V.K., McInerney, M.J., 1993. Pretest Studies for a Microbially Enhanced Oil Recovery Field Pilot in a Hypersaline Oil Reservoir. <i>Geomicrobiology Journal</i> 11, 19–34. <a href="https://doi.org/10.1080/01490459309377929">https://doi.org/10.1080/01490459309377929</a>                                                                                                                                          |
| 8     | Bhupathiraju, V.K., Sharma, P.K., McInerney, M.J., Knapp, R.M., Fowler, K., Jenkins, W., 1991. Ch. R-7 Isolation and Characterization of Novel Halophilic Anaerobic Bacteria from Oil Field Brines, in: <i>Developments in Petroleum Science</i> . Elsevier, pp. 131–143. <a href="https://doi.org/10.1016/S0376-7361(09)70155-4">https://doi.org/10.1016/S0376-7361(09)70155-4</a>                                                 |
| 9     | Bi, Z., Zhang, J., Park, S., Harpalani, S., Liang, Y., 2017. A formation water-based nutrient recipe for potentially increasing methane release from coal in situ. <i>Fuel</i> 209, 498–508. <a href="https://doi.org/10.1016/j.fuel.2017.08.008">https://doi.org/10.1016/j.fuel.2017.08.008</a>                                                                                                                                    |
| 10    | Birkle, P., Cid Vázquez, A.L., Fong Aguilar, J.L., 2005. Legal Aspects and Technical Alternatives for the Treatment of Reservoir Brines at the Activo Luna Oilfield, Mexico. <i>Water Environment Research</i> 77, 68–77. <a href="https://doi.org/10.2175/106143005X41645">https://doi.org/10.2175/106143005X41645</a>                                                                                                             |
| 11    | Birkle, P., García, B.M., Milland Padrón, C.M., 2009. Origin and evolution of formation water at the Jujo–Tecominoacán oil reservoir, Gulf of Mexico. Part 1: Chemical evolution and water–rock interaction. <i>Applied Geochemistry</i> 24, 543–554. <a href="https://doi.org/10.1016/j.apgeochem.2008.12.009">https://doi.org/10.1016/j.apgeochem.2008.12.009</a>                                                                 |
| 12    | Birkle, P., Rosillo Aragon, J.J., Portugal, E., Fong Aguilar, J.L., 2002. Evolution and origin of deep reservoir water at the Activo Luna oil field, Gulf of Mexico, Mexico. <i>AAPG Bulletin</i> 86. <a href="https://doi.org/10.1306/61EEDB0C-173E-11D7-8645000102C1865D">https://doi.org/10.1306/61EEDB0C-173E-11D7-8645000102C1865D</a>                                                                                         |
| 13    | Blauch, M.E., Myers, R.R., Moore, T., Lipinski, B.A., Houston, N.A., 2009. Marcellus Shale Post-Frac Flowback Waters - Where is All the Salt Coming from and What are the Implications?, in: <i>SPE Eastern Regional Meeting</i> . Presented at the SPE Eastern Regional Meeting, Society of Petroleum Engineers, Charleston, West Virginia, USA. <a href="https://doi.org/10.2118/125740-MS">https://doi.org/10.2118/125740-MS</a> |
| 14    | Breit, G.N., Kharaka, Y.K., Zielinski, R.A., Rice, C.A., Smith, B.D., Ridgley, J.L., 1997. US Geological Survey studies of water co-produced with oil and gas: implications for future petroleum resource development. Presented at the SPE/EPA Exploration and Production Environmental Conference, Dallas, Texas.                                                                                                                 |
| 15    | Capo, R.C., Stewart, B.W., Rowan, E.L., Kolesar Kohl, C.A., Wall, A.J., Chapman, E.C., Hammack, R.W., Schroeder, K.T., 2014. The strontium isotopic evolution of Marcellus Formation produced waters, southwestern Pennsylvania. <i>International Journal of Coal Geology</i> 126, 57–63. <a href="https://doi.org/10.1016/j.coal.2013.12.010">https://doi.org/10.1016/j.coal.2013.12.010</a>                                       |
| 16    | Carey, J., Zaidi, A., Ribo, J., 1992. Specific Toxic Organics in Produced Waters from In-Situ Heavy Oil Recovery Operations in Western Canada, in: Ray, J.P., Engelhardt, F.R. (Eds.), <i>Produced Water</i> . Plenum Press, New York, NY, pp. 133–150. <a href="https://doi.org/10.1007/978-1-4615-2902-6_11">https://doi.org/10.1007/978-1-4615-2902-6_11</a>                                                                     |
| 17    | Chapman, E.C., Capo, R.C., Stewart, B.W., Kirby, C.S., Hammack, R.W., Schroeder, K.T., Edenborn, H.M., 2012. Geochemical and Strontium Isotope Characterization of Produced Waters from Marcellus Shale Natural Gas Extraction. <i>Environmental Science &amp; Technology</i> 46, 3545–3553. <a href="https://doi.org/10.1021/es204005g">https://doi.org/10.1021/es204005g</a>                                                      |
| 18    | Chaudhuri, S., 1978. Strontium isotopic composition of several oilfield brines from Kansas and Colorado. <i>Geochimica et Cosmochimica Acta</i> 42, 329–331. <a href="https://doi.org/10.1016/0016-7037(78)90186-2">https://doi.org/10.1016/0016-7037(78)90186-2</a>                                                                                                                                                                |
| 19    | Cheung, K., Klassen, P., Mayer, B., Goodarzi, F., Aravena, R., 2010. Major ion and isotope geochemistry of fluids and gases from coalbed methane and shallow groundwater wells in Alberta, Canada. <i>Applied Geochemistry</i> 25, 1307–1329. <a href="https://doi.org/10.1016/j.apgeochem.2010.06.002">https://doi.org/10.1016/j.apgeochem.2010.06.002</a>                                                                         |
| 20    | Cheung, K., Sanei, H., Klassen, P., Mayer, B., Goodarzi, F., 2009. Produced fluids and shallow groundwater in coalbed methane (CBM) producing regions of Alberta, Canada: Trace element and rare earth element geochemistry. <i>International Journal of Coal Geology</i> 77, 338–349. <a href="https://doi.org/10.1016/j.coal.2008.07.012">https://doi.org/10.1016/j.coal.2008.07.012</a>                                          |
| 21    | Chittick, E.A., Srebotnjak, T., 2017. An analysis of chemicals and other constituents found in produced water from hydraulically fractured wells in California and the challenges for wastewater management. <i>Journal of Environmental Management</i> 204, 502–509. <a href="https://doi.org/10.1016/j.jenvman.2017.09.002">https://doi.org/10.1016/j.jenvman.2017.09.002</a>                                                     |
| 22    | Chorghé, D., Sari, M.A., Chellam, S., 2017. Boron removal from hydraulic fracturing wastewater by aluminum and iron coagulation: Mechanisms and limitations. <i>Water Research</i> 126, 481–487. <a href="https://doi.org/10.1016/j.watres.2017.09.057">https://doi.org/10.1016/j.watres.2017.09.057</a>                                                                                                                            |
| 23    | Cluff, M.A., Hartsock, A., MacRae, J.D., Carter, K., Mouser, P.J., 2014. Temporal Changes in Microbial Ecology and Geochemistry in Produced Water from Hydraulically Fractured Marcellus Shale Gas Wells. <i>Environmental Science &amp; Technology</i> 48, 6508–6517. <a href="https://doi.org/10.1021/es501173p">https://doi.org/10.1021/es501173p</a>                                                                            |
| 24    | Dahm, K.G., Guerra, K.L., Xu, P., Drewes, J.E., 2011. Composite Geochemical Database for Coalbed Methane Produced Water Quality in the Rocky Mountain Region. <i>Environmental Science &amp; Technology</i> 45, 7655–7663. <a href="https://doi.org/10.1021/es201021n">https://doi.org/10.1021/es201021n</a>                                                                                                                        |



SI Table 4b: Reference IDs

| Reflid | Citation                                                                                                                                                                                                                                                                                                                                                                                                                                          |
|--------|---------------------------------------------------------------------------------------------------------------------------------------------------------------------------------------------------------------------------------------------------------------------------------------------------------------------------------------------------------------------------------------------------------------------------------------------------|
| 25     | Dahm, K.G., Van Straaten, C.M., Munakata-Marr, J., Drewes, J.E., 2013. Identifying Well Contamination through the use of 3-D Fluorescence Spectroscopy to Classify Coalbed Methane Produced Water. <i>Environmental Science &amp; Technology</i> 47, 649–656. <a href="https://doi.org/10.1021/es303866k">https://doi.org/10.1021/es303866k</a>                                                                                                   |
| 26     | DiGiulio, D.C., Jackson, R.B., 2016. Impact to Underground Sources of Drinking Water and Domestic Wells from Production Well Stimulation and Completion Practices in the Pavillion, Wyoming, Field. <i>Environmental Science &amp; Technology</i> 50, 4524–4536. <a href="https://doi.org/10.1021/acs.est.5b04970">https://doi.org/10.1021/acs.est.5b04970</a>                                                                                    |
| 27     | Dresel, P.E., Rose, A.W., 2010. Chemistry and origin of oil and gas well brines in western Pennsylvania (No. Open-File Report OFOG 10–01.0). Pennsylvania Department of Environmental Protection, Harrisburg, PA.                                                                                                                                                                                                                                 |
| 28     | Engle, M.A., Reyes, F.R., Varonka, M.S., Orem, W.H., Ma, L., Ianno, A.J., Schell, T.M., Xu, P., Carroll, K.C., 2016. Geochemistry of formation waters from the Wolfcamp and “Cline” shales: Insights into brine origin, reservoir connectivity, and fluid flow in the Permian Basin, USA. <i>Chemical Geology</i> 425, 76–92. <a href="https://doi.org/10.1016/j.chemgeo.2016.01.025">https://doi.org/10.1016/j.chemgeo.2016.01.025</a>           |
| 29     | Esmailirad, N., Carlson, K., Omur Ozbek, P., 2015. Influence of softening sequencing on electrocoagulation treatment of produced water. <i>Journal of Hazardous Materials</i> 283, 721–729. <a href="https://doi.org/10.1016/j.jhazmat.2014.10.046">https://doi.org/10.1016/j.jhazmat.2014.10.046</a>                                                                                                                                             |
| 30     | Esmailirad, N., Terry, C., Kennedy, H., Prior, A., Carlson, K., 2016. Recycling Fracturing Flowback Water for Use in Hydraulic Fracturing: Influence of Organic Matter on Stability of Carboxyl-Methyl-Cellulose-Based Fracturing Fluids. <i>SPE Journal</i> 21, 1358–1369. <a href="https://doi.org/10.2118/179723-PA">https://doi.org/10.2118/179723-PA</a>                                                                                     |
| 31     | ESN, 2002. Produced Gas and Water Testing of CBM Gas Wells in the Raton Basin, Huerfano and Las Animas Counties, Colorado (No. ESN Project no. 1372.01). ESN Rocky Mountain, Golden, CO.                                                                                                                                                                                                                                                          |
| 32     | Ferrer, I., Thurman, E.M., 2015. Analysis of hydraulic fracturing additives by LC/Q-TOF-MS. <i>Analytical and Bioanalytical Chemistry</i> 407, 6417–6428. <a href="https://doi.org/10.1007/s00216-015-8780-5">https://doi.org/10.1007/s00216-015-8780-5</a>                                                                                                                                                                                       |
| 33     | Floquet, C.F.A., Sieben, V.J., MacKay, B.A., Mostowfi, F., 2016. Determination of boron in produced water using the carminic acid assay. <i>Talanta</i> 150, 240–252. <a href="https://doi.org/10.1016/j.talanta.2015.12.010">https://doi.org/10.1016/j.talanta.2015.12.010</a>                                                                                                                                                                   |
| 34     | Fucik, K.W., 1992. Toxicity Identification and Characteristics of Produced Water Discharges from Colorado and Wyoming, in: Ray, J.P., Engelhardt, F.R. (Eds.), <i>Produced Water</i> . Plenum Press, New York, NY, pp. 187–198. <a href="https://doi.org/10.1007/978-1-4615-2902-6_15">https://doi.org/10.1007/978-1-4615-2902-6_15</a>                                                                                                           |
| 35     | Gieg, L.M., Davidova, I.A., Duncan, K.E., Suflita, J.M., 2010. Methanogenesis, sulfate reduction and crude oil biodegradation in hot Alaskan oilfields: Methanogenic crude oil biodegradation in hot oilfields. <i>Environmental Microbiology</i> 12, 3074–3086. <a href="https://doi.org/10.1111/j.1462-2920.2010.02282.x">https://doi.org/10.1111/j.1462-2920.2010.02282.x</a>                                                                  |
| 36     | Goldberg, R.B., Griffith, E.M., 2017. Strontium isotopes as a potential fingerprint of total dissolved solids associated with hydraulic-fracturing activities in the Barnett Shale, Texas. <i>Environmental Geosciences</i> 24, 151–165. <a href="https://doi.org/10.1306/eg.06191716501">https://doi.org/10.1306/eg.06191716501</a>                                                                                                              |
| 37     | Harkness, J.S., Dwyer, G.S., Warner, N.R., Parker, K.M., Mitch, W.A., Vengosh, A., 2015. Iodide, Bromide, and Ammonium in Hydraulic Fracturing and Oil and Gas Wastewaters: Environmental Implications. <i>Environmental Science &amp; Technology</i> 49, 1955–1963. <a href="https://doi.org/10.1021/es504654n">https://doi.org/10.1021/es504654n</a>                                                                                            |
| 38     | Hayes, T., 2009. Sampling and Analysis of Water Streams Associated with the Development of Marcellus Shale Gas. Gas Technology Institute, Des Plaines, IL.                                                                                                                                                                                                                                                                                        |
| 39     | Hayes, T., Severin, B.F., 2012. Barnett and Appalachian Shale Water Management and Reuse Technologies (No. RPSEA 08122-05). Gas Technology Institute, Des Plaines, IL.                                                                                                                                                                                                                                                                            |
| 40     | He, C., Zhang, T., Vidic, R.D., 2016. Co-treatment of abandoned mine drainage and Marcellus Shale flowback water for use in hydraulic fracturing. <i>Water Research</i> 104, 425–431. <a href="https://doi.org/10.1016/j.watres.2016.08.030">https://doi.org/10.1016/j.watres.2016.08.030</a>                                                                                                                                                     |
| 41     | He, Y., Flynn, S.L., Folkerts, E.J., Zhang, Y., Ruan, D., Alessi, D.S., Martin, J.W., Goss, G.G., 2017. Chemical and toxicological characterizations of hydraulic fracturing flowback and produced water. <i>Water Research</i> 114, 78–87. <a href="https://doi.org/10.1016/j.watres.2017.02.027">https://doi.org/10.1016/j.watres.2017.02.027</a>                                                                                               |
| 42     | He, Y., Sun, C., Zhang, Y., Folkerts, E.J., Martin, J.W., Goss, G.G., 2018. Developmental Toxicity of the Organic Fraction from Hydraulic Fracturing Flowback and Produced Waters to Early Life Stages of Zebrafish ( <i>Danio rerio</i> ). <i>Environmental Science &amp; Technology</i> 52, 3820–3830. <a href="https://doi.org/10.1021/acs.est.7b06557">https://doi.org/10.1021/acs.est.7b06557</a>                                            |
| 43     | Hickenbottom, K.L., Hancock, N.T., Hutchings, N.R., Appleton, E.W., Beaudry, E.G., Xu, P., Cath, T.Y., 2013. Forward osmosis treatment of drilling mud and fracturing wastewater from oil and gas operations. <i>Desalination</i> 312, 60–66. <a href="https://doi.org/10.1016/j.desal.2012.05.037">https://doi.org/10.1016/j.desal.2012.05.037</a>                                                                                               |
| 44     | Hoelzer, K., Sumner, A.J., Karatum, O., Nelson, R.K., Drollette, B.D., O'Connor, M.P., D'Ambro, E.L., Getzinger, G.J., Ferguson, P.L., Reddy, C.M., Elsner, M., Plata, D.L., 2016. Indications of Transformation Products from Hydraulic Fracturing Additives in Shale-Gas Wastewater. <i>Environmental Science &amp; Technology</i> 50, 8036–8048. <a href="https://doi.org/10.1021/acs.est.6b00430">https://doi.org/10.1021/acs.est.6b00430</a> |
| 45     | Huang, F.Y.C., Martinez, A.D., Wei, Q., 2018. Beneficial Use of Highly Saline Produced Water in Pressure-Retarded Osmosis. <i>Environmental Engineering Science</i> 35, 472–483. <a href="https://doi.org/10.1089/ees.2017.0234">https://doi.org/10.1089/ees.2017.0234</a>                                                                                                                                                                        |
| 46     | Hulecki, J.C., Foght, J.M., Fedorak, P.M., 2010. Storage of oil field-produced waters alters their chemical and microbiological characteristics. <i>J Ind Microbiol Biotechnol</i> 37, 471–481. <a href="https://doi.org/10.1007/s10295-010-0693-x">https://doi.org/10.1007/s10295-010-0693-x</a>                                                                                                                                                 |
| 47     | Jackson, R.E., Reddy, K.J., 2007. Trace Element Chemistry of Coal Bed Natural Gas Produced Water in the Powder River Basin, Wyoming. <i>Environmental Science &amp; Technology</i> 41, 5953–5959. <a href="https://doi.org/10.1021/es062504o">https://doi.org/10.1021/es062504o</a>                                                                                                                                                               |
| 48     | Jiang, Q., Rentschler, J., Perrone, R., Liu, K., 2013. Application of ceramic membrane and ion-exchange for the treatment of the flowback water from Marcellus shale gas production. <i>Journal of Membrane Science</i> 431, 55–61. <a href="https://doi.org/10.1016/j.memsci.2012.12.030">https://doi.org/10.1016/j.memsci.2012.12.030</a>                                                                                                       |

SI Table 4b: Reference IDs

| RefId | Citation                                                                                                                                                                                                                                                                                                                                                                                                                                                                        |
|-------|---------------------------------------------------------------------------------------------------------------------------------------------------------------------------------------------------------------------------------------------------------------------------------------------------------------------------------------------------------------------------------------------------------------------------------------------------------------------------------|
| 49    | Kassotis, C.D., Klemp, K.C., Vu, D.C., Lin, C.-H., Meng, C.-X., Besch-Williford, C.L., Pinatti, L., Zoeller, R.T., Drobnis, E.Z., Balise, V.D., Isiguzo, C.J., Williams, M.A., Tillitt, D.E., Nagel, S.C., 2015. Endocrine-Disrupting Activity of Hydraulic Fracturing Chemicals and Adverse Health Outcomes After Prenatal Exposure in Male Mice. <i>Endocrinology</i> 156, 4458–4473. <a href="https://doi.org/10.1210/en.2015-1375">https://doi.org/10.1210/en.2015-1375</a> |
| 50    | Khan, N.A., Engle, M., Dungan, B., Holguin, F.O., Xu, P., Carroll, K.C., 2016. Volatile-organic molecular characterization of shale-oil produced water from the Permian Basin. <i>Chemosphere</i> 148, 126–136. <a href="https://doi.org/10.1016/j.chemosphere.2015.12.116">https://doi.org/10.1016/j.chemosphere.2015.12.116</a>                                                                                                                                               |
| 51    | Kharaka, Y.K., Maest, A.S., Carothers, W.W., Law, L.M., Lamothe, P.J., Fries, T.L., 1987. Geochemistry of metal-rich brines from central Mississippi Salt Dome basin, U.S.A. <i>Applied Geochemistry</i> 2, 543–561. <a href="https://doi.org/10.1016/0883-2927(87)90008-4">https://doi.org/10.1016/0883-2927(87)90008-4</a>                                                                                                                                                    |
| 52    | Kim, Junghyun, Kim, Jungwon, Hong, S., 2018. Recovery of water and minerals from shale gas produced water by membrane distillation crystallization. <i>Water Research</i> 129, 447–459. <a href="https://doi.org/10.1016/j.watres.2017.11.017">https://doi.org/10.1016/j.watres.2017.11.017</a>                                                                                                                                                                                 |
| 53    | Kim, S., Omur-Ozbek, P., Dhanasekar, A., Prior, A., Carlson, K., 2016. Temporal analysis of flowback and produced water composition from shale oil and gas operations: Impact of frac fluid characteristics. <i>Journal of Petroleum Science and Engineering</i> 147, 202–210. <a href="https://doi.org/10.1016/j.petrol.2016.06.019">https://doi.org/10.1016/j.petrol.2016.06.019</a>                                                                                          |
| 54    | Kirk, M.F., Wilson, B.H., Marquart, K.A., Zeglin, L.H., Vinson, D.S., Flynn, T.M., 2015. Solute Concentrations Influence Microbial Methanogenesis in Coal-bearing Strata of the Cherokee Basin, USA. <i>Frontiers in Microbiology</i> 6. <a href="https://doi.org/10.3389/fmicb.2015.01287">https://doi.org/10.3389/fmicb.2015.01287</a>                                                                                                                                        |
| 55    | Lachmar, T., Randall, K., 2010. Suitability of central Utah's Navajo Sandstone for Disposal of Mined Hydrocarbon Water, in: <i>Mine Water and the Environment</i> . Presented at the International Mine Water Association, Golden, CO.                                                                                                                                                                                                                                          |
| 56    | Lauer, N.E., Harkness, J.S., Vengosh, A., 2016. Brine Spills Associated with Unconventional Oil Development in North Dakota. <i>Environmental Science &amp; Technology</i> 50, 5389–5397. <a href="https://doi.org/10.1021/acs.est.5b06349">https://doi.org/10.1021/acs.est.5b06349</a>                                                                                                                                                                                         |
| 57    | Lester, Y., Ferrer, I., Thurman, E.M., Sitterley, K.A., Korak, J.A., Aiken, G., Linden, K.G., 2015. Characterization of hydraulic fracturing flowback water in Colorado: Implications for water treatment. <i>Science of The Total Environment</i> 512–513, 637–644. <a href="https://doi.org/10.1016/j.scitotenv.2015.01.043">https://doi.org/10.1016/j.scitotenv.2015.01.043</a>                                                                                              |
| 58    | Li, G., Bai, B., Carlson, K.H., 2016. Characterization of solids in produced water from wells fractured with recycled and fresh water. <i>Journal of Petroleum Science and Engineering</i> 144, 91–98. <a href="https://doi.org/10.1016/j.petrol.2016.03.011">https://doi.org/10.1016/j.petrol.2016.03.011</a>                                                                                                                                                                  |
| 59    | Li, H., Son, J.-H., Carlson, K.H., 2016. Concurrence of aqueous and gas phase contamination of groundwater in the Wattenberg oil and gas field of northern Colorado. <i>Water Research</i> 88, 458–466. <a href="https://doi.org/10.1016/j.watres.2015.10.031">https://doi.org/10.1016/j.watres.2015.10.031</a>                                                                                                                                                                 |
| 60    | Liang, R., Davidova, I.A., Marks, C.R., Stamps, B.W., Harriman, B.H., Stevenson, B.S., Duncan, K.E., Sufliya, J.M., 2016. Metabolic Capability of a Predominant Halanaerobium sp. in Hydraulically Fractured Gas Wells and Its Implication in Pipeline Corrosion. <i>Frontiers in Microbiology</i> 7. <a href="https://doi.org/10.3389/fmicb.2016.00988">https://doi.org/10.3389/fmicb.2016.00988</a>                                                                           |
| 61    | Lipus, D., Vikram, A., Ross, D., Bain, D., Gulliver, D., Hammack, R., Bibby, K., 2017. Predominance and Metabolic Potential of Halanaerobium spp. in Produced Water from Hydraulically Fractured Marcellus Shale Wells. <i>Applied and Environmental Microbiology</i> 83. <a href="https://doi.org/10.1128/AEM.02659-16">https://doi.org/10.1128/AEM.02659-16</a>                                                                                                               |
| 62    | Llewellyn, G.T., Dorman, F., Westland, J.L., Yoxheimer, D., Grieve, P., Sowers, T., Humston-Fulmer, E., Brantley, S.L., 2015. Evaluating a groundwater supply contamination incident attributed to Marcellus Shale gas development. <i>Proceedings of the National Academy of Sciences</i> 112, 6325–6330. <a href="https://doi.org/10.1073/pnas.1420279112">https://doi.org/10.1073/pnas.1420279112</a>                                                                        |
| 63    | Luek, J.L., Schmitt-Kopplin, P., Mouser, P.J., Petty, W.T., Richardson, S.D., Gonsior, M., 2017. Halogenated Organic Compounds Identified in Hydraulic Fracturing Wastewaters Using Ultrahigh Resolution Mass Spectrometry. <i>Environmental Science &amp; Technology</i> 51, 5377–5385. <a href="https://doi.org/10.1021/acs.est.6b06213">https://doi.org/10.1021/acs.est.6b06213</a>                                                                                          |
| 64    | Lutzu, G.A., Dunford, N.T., 2017. Algal treatment of wastewater generated during oil and gas production using hydraulic fracturing technology. <i>Environmental Technology</i> 1–8. <a href="https://doi.org/10.1080/09593330.2017.1415983">https://doi.org/10.1080/09593330.2017.1415983</a>                                                                                                                                                                                   |
| 65    | Lyman, S.N., Mansfield, M.L., Tran, H.N.Q., Evans, J.D., Jones, C., O'Neil, T., Bowers, R., Smith, A., Keslar, C., 2018. Emissions of organic compounds from produced water ponds I: Characteristics and speciation. <i>Science of The Total Environment</i> 619–620, 896–905. <a href="https://doi.org/10.1016/j.scitotenv.2017.11.161">https://doi.org/10.1016/j.scitotenv.2017.11.161</a>                                                                                    |
| 66    | Macpherson, G.L., Capo, R.C., Stewart, B.W., Phan, T.T., Schroeder, K., Hammack, R.W., 2014. Temperature-dependent Li isotope ratios in Appalachian Plateau and Gulf Coast Sedimentary Basin saline water. <i>Geofluids</i> 14, 419–429. <a href="https://doi.org/10.1111/gfl.12084">https://doi.org/10.1111/gfl.12084</a>                                                                                                                                                      |
| 67    | Maguire-Boyle, S.J., Barron, A.R., 2014. Organic compounds in produced waters from shale gas wells. <i>Environ. Sci.: Processes Impacts</i> 16, 2237–2248. <a href="https://doi.org/10.1039/C4EM00376D">https://doi.org/10.1039/C4EM00376D</a>                                                                                                                                                                                                                                  |
| 68    | McBeth, I., Reddy, K.J., Skinner, Q.D., 2003. Chemistry of trace elements in coalbed methane product water. <i>Water Research</i> 37, 884–890. <a href="https://doi.org/10.1016/S0043-1354(02)00382-2">https://doi.org/10.1016/S0043-1354(02)00382-2</a>                                                                                                                                                                                                                        |
| 69    | Murali Mohan, A., Hartsock, A., Bibby, K.J., Hammack, R.W., Vidic, R.D., Gregory, K.B., 2013a. Microbial Community Changes in Hydraulic Fracturing Fluids and Produced Water from Shale Gas Extraction. <i>Environmental Science &amp; Technology</i> 47, 13141–13150. <a href="https://doi.org/10.1021/es402928b">https://doi.org/10.1021/es402928b</a>                                                                                                                        |
| 70    | Murali Mohan, A., Hartsock, A., Hammack, R.W., Vidic, R.D., Gregory, K.B., 2013b. Microbial communities in flowback water impoundments from hydraulic fracturing for recovery of shale gas. <i>FEMS Microbiology Ecology</i> 86, 567–580. <a href="https://doi.org/10.1111/1574-6941.12183">https://doi.org/10.1111/1574-6941.12183</a>                                                                                                                                         |
| 71    | Murray-Gulde, C., Heatley, J.E., Karanfil, T., Rodgers, J.H., Myers, J.E., 2003. Performance of a hybrid reverse osmosis-constructed wetland treatment system for brackish oil field produced water. <i>Water Research</i> 37, 705–713. <a href="https://doi.org/10.1016/S0043-1354(02)00353-6">https://doi.org/10.1016/S0043-1354(02)00353-6</a>                                                                                                                               |

SI Table 4b: Reference IDs

| RefId | Citation                                                                                                                                                                                                                                                                                                                                                                                                                                                                                  |
|-------|-------------------------------------------------------------------------------------------------------------------------------------------------------------------------------------------------------------------------------------------------------------------------------------------------------------------------------------------------------------------------------------------------------------------------------------------------------------------------------------------|
| 72    | Nelson, A.W., Eitrheim, E.S., Knight, A.W., May, D., Mehrhoff, M.A., Shannon, R., Litman, R., Burnett, W.C., Forbes, T.Z., Schultz, M.K., 2015. Understanding the Radioactive Ingrowth and Decay of Naturally Occurring Radioactive Materials in the Environment: An Analysis of Produced Fluids from the Marcellus Shale. <i>Environmental Health Perspectives</i> 123, 689–696. <a href="https://doi.org/10.1289/ehp.1408855">https://doi.org/10.1289/ehp.1408855</a>                   |
| 73    | Nelson, A.W., May, D., Knight, A.W., Eitrheim, E.S., Mehrhoff, M., Shannon, R., Litman, R., Schultz, M.K., 2014. Matrix Complications in the Determination of Radium Levels in Hydraulic Fracturing Flowback Water from Marcellus Shale. <i>Environmental Science &amp; Technology Letters</i> 1, 204–208. <a href="https://doi.org/10.1021/ez5000379">https://doi.org/10.1021/ez5000379</a>                                                                                              |
| 74    | NYSDEC, 2015. Natural Gas Development Activities & High-Volume Hydraulic Fracturing (Supplemental Generic Environmental Impact Statement (SEGIS)). New York State Department of Environmental Conservation, Albany, Ny.                                                                                                                                                                                                                                                                   |
| 75    | Oetjen, K., Chan, K.E., Gulmark, K., Christensen, J.H., Blotevogel, J., Borch, T., Spear, J.R., Cath, T.Y., Higgins, C.P., 2018. Temporal characterization and statistical analysis of flowback and produced waters and their potential for reuse. <i>Science of The Total Environment</i> 619–620, 654–664. <a href="https://doi.org/10.1016/j.scitotenv.2017.11.078">https://doi.org/10.1016/j.scitotenv.2017.11.078</a>                                                                |
| 76    | Orem, W., Tatu, C., Varonka, M., Lerch, H., Bates, A., Engle, M., Crosby, L., McIntosh, J., 2014. Organic substances in produced and formation water from unconventional natural gas extraction in coal and shale. <i>International Journal of Coal Geology</i> 126, 20–31. <a href="https://doi.org/10.1016/j.coal.2014.01.003">https://doi.org/10.1016/j.coal.2014.01.003</a>                                                                                                           |
| 77    | Orem, W.H., Tatu, C.A., Lerch, H.E., Rice, C.A., Bartos, T.T., Bates, A.L., Tewalt, S., Corum, M.D., 2007. Organic compounds in produced waters from coalbed natural gas wells in the Powder River Basin, Wyoming, USA. <i>Applied Geochemistry</i> 22, 2240–2256. <a href="https://doi.org/10.1016/j.apgeochem.2007.04.010">https://doi.org/10.1016/j.apgeochem.2007.04.010</a>                                                                                                          |
| 78    | Osselin, F., Nightingale, M., Hearn, G., Kloppmann, W., Gaucher, E., Clarkson, C.R., Mayer, B., 2018. Quantifying the extent of flowback of hydraulic fracturing fluids using chemical and isotopic tracer approaches. <i>Applied Geochemistry</i> 93, 20–29. <a href="https://doi.org/10.1016/j.apgeochem.2018.03.008">https://doi.org/10.1016/j.apgeochem.2018.03.008</a>                                                                                                               |
| 79    | PADEP, 2016. Technologically Enhanced Naturally Occurring Radioactive Materials (TENORM) Study Report. Pennsylvania Department of Environmental Protection, Harrisburg, PA.                                                                                                                                                                                                                                                                                                               |
| 80    | Pancras, J.P., Norris, G.A., Landis, M.S., Kovalcik, K.D., McGee, J.K., Kamal, A.S., 2015. Application of ICP-OES for evaluating energy extraction and production wastewater discharge impacts on surface waters in Western Pennsylvania. <i>Science of The Total Environment</i> 529, 21–29. <a href="https://doi.org/10.1016/j.scitotenv.2015.04.011">https://doi.org/10.1016/j.scitotenv.2015.04.011</a>                                                                               |
| 81    | Parker, K.M., Zeng, T., Harkness, J., Vengosh, A., Mitch, W.A., 2014. Enhanced Formation of Disinfection Byproducts in Shale Gas Wastewater-Impacted Drinking Water Supplies. <i>Environmental Science &amp; Technology</i> 48, 11161–11169. <a href="https://doi.org/10.1021/es5028184">https://doi.org/10.1021/es5028184</a>                                                                                                                                                            |
| 82    | Pashin, J.C., McIntyre-Redden, M.R., Mann, S.D., Kopaska-Merkel, D.C., 2014a. Water Management Strategies for Improved Coalbed Methane Production in the Black Warrior Basins (Geological Survey of Alabama No. DE-FE0000888). U.S. Department of Energy, National Energy Technology Library, Washington, DC.                                                                                                                                                                             |
| 83    | Pashin, J.C., McIntyre-Redden, M.R., Mann, S.D., Kopaska-Merkel, D.C., Varonka, M., Orem, W., 2014b. Relationships between water and gas chemistry in mature coalbed methane reservoirs of the Black Warrior Basin. <i>International Journal of Coal Geology</i> 126, 92–105. <a href="https://doi.org/10.1016/j.coal.2013.10.002">https://doi.org/10.1016/j.coal.2013.10.002</a>                                                                                                         |
| 84    | Peterman, Z., Thamke, J., 2016. Chemical and isotopic changes in Williston Basin brines during long-term oil production: An example from the Poplar dome, Montana. <i>Bulletin</i> 100, 1619–1632. <a href="https://doi.org/10.1306/05261615114">https://doi.org/10.1306/05261615114</a>                                                                                                                                                                                                  |
| 85    | Peterman, Z.E., Thamke, J., Futa, K., Preston, T., 2012. Strontium isotope systematics of mixing groundwater and oil-field brine at Goose Lake in northeastern Montana, USA. <i>Applied Geochemistry</i> 27, 2403–2408. <a href="https://doi.org/10.1016/j.apgeochem.2012.08.004">https://doi.org/10.1016/j.apgeochem.2012.08.004</a>                                                                                                                                                     |
| 86    | Pfister, S., Capo, R.C., Stewart, B.W., Macpherson, G.L., Phan, T.T., Gardiner, J.B., Diehl, J.R., Lopano, C.L., Hakala, J.A., 2017. Geochemical and lithium isotope tracking of dissolved solid sources in Permian Basin carbonate reservoir and overlying aquifer waters at an enhanced oil recovery site, northwest Texas, USA. <i>Applied Geochemistry</i> 87, 122–135. <a href="https://doi.org/10.1016/j.apgeochem.2017.10.013">https://doi.org/10.1016/j.apgeochem.2017.10.013</a> |
| 87    | Phan, T.T., Capo, R.C., Stewart, B.W., Graney, J.R., Johnson, J.D., Sharma, S., Toro, J., 2015. Trace metal distribution and mobility in drill cuttings and produced waters from Marcellus Shale gas extraction: Uranium, arsenic, barium. <i>Applied Geochemistry</i> 60, 89–103. <a href="https://doi.org/10.1016/j.apgeochem.2015.01.013">https://doi.org/10.1016/j.apgeochem.2015.01.013</a>                                                                                          |
| 88    | Phan, T.T., Capo, R.C., Stewart, B.W., Macpherson, G.L., Rowan, E.L., Hammack, R.W., 2016. Factors controlling Li concentration and isotopic composition in formation waters and host rocks of Marcellus Shale, Appalachian Basin. <i>Chemical Geology</i> 420, 162–179. <a href="https://doi.org/10.1016/j.chemgeo.2015.11.003">https://doi.org/10.1016/j.chemgeo.2015.11.003</a>                                                                                                        |
| 89    | Piotrowski, P.K., Weggler, B.A., Barth-Naftilan, E., Kelly, C.N., Zimmermann, R., Saiers, J.E., Dorman, F.L., 2018a. Non-Targeted chemical characterization of a Marcellus shale gas well through GC × GC with scripting algorithms and high-resolution time-of-flight mass spectrometry. <i>Fuel</i> 215, 363–369. <a href="https://doi.org/10.1016/j.fuel.2017.11.026">https://doi.org/10.1016/j.fuel.2017.11.026</a>                                                                   |
| 90    | Piotrowski, P.K., Weggler, B.A., Yoxtheimer, D.A., Kelly, C.N., Barth-Naftilan, E., Saiers, J.E., Dorman, F.L., 2018b. Elucidating Environmental Fingerprinting Mechanisms of Unconventional Gas Development through Hydrocarbon Analysis. <i>Analytical Chemistry</i> 90, 5466–5473. <a href="https://doi.org/10.1021/acs.analchem.8b00822">https://doi.org/10.1021/acs.analchem.8b00822</a>                                                                                             |
| 91    | Reddy, K.J., Helmericks, C., Whitman, A., Legg, D., 2014. Geochemical processes controlling trace elemental mobility in coalbed natural gas (CBNG) disposal ponds in the Powder River Basin, WY. <i>International Journal of Coal Geology</i> 126, 120–127. <a href="https://doi.org/10.1016/j.coal.2014.01.001">https://doi.org/10.1016/j.coal.2014.01.001</a>                                                                                                                           |
| 92    | Regnery, J., Coday, B.D., Riley, S.M., Cath, T.Y., 2016. Solid-phase extraction followed by gas chromatography-mass spectrometry for the quantitative analysis of semi-volatile hydrocarbons in hydraulic fracturing wastewaters. <i>Analytical Methods</i> 8, 2058–2068. <a href="https://doi.org/10.1039/C6AY00169F">https://doi.org/10.1039/C6AY00169F</a>                                                                                                                             |
| 93    | Rice, C.A., 2003. Production waters associated with the Ferron coalbed methane fields, central Utah: chemical and isotopic composition and volumes. <i>International Journal of Coal Geology</i> 56, 141–169. <a href="https://doi.org/10.1016/S0166-5162(03)00086-7">https://doi.org/10.1016/S0166-5162(03)00086-7</a>                                                                                                                                                                   |

SI Table 4b: Reference IDs

| RefId | Citation                                                                                                                                                                                                                                                                                                                                                                                                                   |
|-------|----------------------------------------------------------------------------------------------------------------------------------------------------------------------------------------------------------------------------------------------------------------------------------------------------------------------------------------------------------------------------------------------------------------------------|
| 94    | Rice, C.A., Ellis, M.S., Bullock, J.H., 2000. Water co-produced with coalbed methane in the Powder River Basin, Wyoming: preliminary compositional data (No. Open-File Report 00-372). U.S. Department of the Interior, U.S. Geological Survey, Denver, CO.                                                                                                                                                                |
| 95    | Rich, A.L., Crosby, E.C., 2013. Analysis of Reserve Pit Sludge from Unconventional Natural Gas Hydraulic Fracturing and Drilling Operations for the Presence of Technologically Enhanced Naturally Occurring Radioactive Material (TENORM). <i>NEW SOLUTIONS: A Journal of Environmental and Occupational Health Policy</i> 23, 117–135. <a href="https://doi.org/10.2190/NS.23.1.h">https://doi.org/10.2190/NS.23.1.h</a> |
| 96    | Riley, S.M., Oliveira, J.M.S., Regnery, J., Cath, T.Y., 2016. Hybrid membrane bio-systems for sustainable treatment of oil and gas produced water and fracturing flowback water. <i>Separation and Purification Technology</i> 171, 297–311. <a href="https://doi.org/10.1016/j.seppur.2016.07.008">https://doi.org/10.1016/j.seppur.2016.07.008</a>                                                                       |
| 97    | Rogers, J.L., Hicks, R.T., Shaw, B., Jensen, J., 1992. Procedure for Development of Contingency Plans to Mitigate Produced Water Releases on BLM Lands, in: Ray, J.P., Engelhardt, F.R. (Eds.), <i>Produced Water</i> . Plenum Press, New York, NY, pp. 35–44. <a href="https://doi.org/10.1007/978-1-4615-2902-6_4">https://doi.org/10.1007/978-1-4615-2902-6_4</a>                                                       |
| 98    | Rosenblum, J., Nelson, A.W., Ruyle, B., Schultz, M.K., Ryan, J.N., Linden, K.G., 2017a. Temporal characterization of flowback and produced water quality from a hydraulically fractured oil and gas well. <i>Science of The Total Environment</i> 596–597, 369–377. <a href="https://doi.org/10.1016/j.scitotenv.2017.03.294">https://doi.org/10.1016/j.scitotenv.2017.03.294</a>                                          |
| 99    | Rosenblum, J., Thurman, E.M., Ferrer, I., Aiken, G., Linden, K.G., 2017b. Organic Chemical Characterization and Mass Balance of a Hydraulically Fractured Well: From Fracturing Fluid to Produced Water over 405 Days. <i>Environmental Science &amp; Technology</i> 51, 14006–14015. <a href="https://doi.org/10.1021/acs.est.7b03362">https://doi.org/10.1021/acs.est.7b03362</a>                                        |
| 100   | Rosenblum, J.S., Sitterley, K.A., Thurman, E.M., Ferrer, I., Linden, K.G., 2016. Hydraulic fracturing wastewater treatment by coagulation-adsorption for removal of organic compounds and turbidity. <i>Journal of Environmental Chemical Engineering</i> 4, 1978–1984. <a href="https://doi.org/10.1016/j.jece.2016.03.013">https://doi.org/10.1016/j.jece.2016.03.013</a>                                                |
| 101   | Rowen, E.L., Engle, M.A., Kirby, C.S., Kraemer, T.F., 2011. Radium Content of Oil- and Gas-Field Produced Waters in the Northern Appalachian Basin (USA) (No. Scientific Investigations Report 2011–5135). U.S. Geological Survey, Reston, Virginia.                                                                                                                                                                       |
| 102   | Rowen, E.L., Engle, M.A., Kraemer, T.F., Schroeder, K.T., Hammack, R.W., Doughten, M.W., 2015. Geochemical and isotopic evolution of water produced from Middle Devonian Marcellus shale gas wells, Appalachian basin, Pennsylvania. <i>AAPG Bulletin</i> 99, 181–206. <a href="https://doi.org/10.1306/07071413146">https://doi.org/10.1306/07071413146</a>                                                               |
| 103   | Sardari, K., Fyfe, P., Lincicome, D., Wickramasinghe, S.R., 2018. Aluminum electrocoagulation followed by forward osmosis for treating hydraulic fracturing produced waters. <i>Desalination</i> 428, 172–181. <a href="https://doi.org/10.1016/j.desal.2017.11.030">https://doi.org/10.1016/j.desal.2017.11.030</a>                                                                                                       |
| 104   | Sari, M.A., Chellam, S., 2015. Mechanisms of boron removal from hydraulic fracturing wastewater by aluminum electrocoagulation. <i>Journal of Colloid and Interface Science</i> 458, 103–111. <a href="https://doi.org/10.1016/j.jcis.2015.07.035">https://doi.org/10.1016/j.jcis.2015.07.035</a>                                                                                                                          |
| 105   | Saunders, J.A., Swann, C.T., 1990. Trace-metal content of Mississippi oil field brines. <i>Journal of Geochemical Exploration</i> 37, 171–183. <a href="https://doi.org/10.1016/0375-6742(90)90025-6">https://doi.org/10.1016/0375-6742(90)90025-6</a>                                                                                                                                                                     |
| 106   | Shih, J.-S., Saiers, J.E., Anisfeld, S.C., Chu, Z., Muehlenbachs, L.A., Olmstead, S.M., 2015. Characterization and Analysis of Liquid Waste from Marcellus Shale Gas Development. <i>Environmental Science &amp; Technology</i> 49, 9557–9565. <a href="https://doi.org/10.1021/acs.est.5b01780">https://doi.org/10.1021/acs.est.5b01780</a>                                                                               |
| 107   | Sidhu, A., Mitsch, W., 1987. Water Pollution from Oil and Gas Recovery in Eastern Kentucky Watersheds. <i>Water Resources Bulletin</i> 23, 943–953. <a href="https://doi.org/10.1111/j.1752-1688.1987.tb02974.x">https://doi.org/10.1111/j.1752-1688.1987.tb02974.x</a>                                                                                                                                                    |
| 108   | Singh, D., Prakash, P., Sirkar, K.K., 2013. Deoiled Produced Water Treatment Using Direct-Contact Membrane Distillation. <i>Industrial &amp; Engineering Chemistry Research</i> 52, 13439–13448. <a href="https://doi.org/10.1021/ie4015809">https://doi.org/10.1021/ie4015809</a>                                                                                                                                         |
| 109   | Sirivedhin, T., Dallbauman, L., 2004. Organic matrix in produced water from the Osage-Skiatook Petroleum Environmental Research site, Osage county, Oklahoma. <i>Chemosphere</i> 57, 463–469. <a href="https://doi.org/10.1016/j.chemosphere.2004.05.034">https://doi.org/10.1016/j.chemosphere.2004.05.034</a>                                                                                                            |
| 110   | Strong, L.C., Gould, T., Kasinkas, L., Sadowsky, M.J., Aksan, A., Wackett, L.P., 2014. Biodegradation in Waters from Hydraulic Fracturing: Chemistry, Microbiology, and Engineering. <i>Journal of Environmental Engineering</i> 140, B4013001. <a href="https://doi.org/10.1061/(ASCE)EE.1943-7870.0000792">https://doi.org/10.1061/(ASCE)EE.1943-7870.0000792</a>                                                        |
| 111   | Struchtemeyer, C.G., Elshahed, M.S., 2012. Bacterial communities associated with hydraulic fracturing fluids in thermogenic natural gas wells in North Central Texas, USA. <i>FEMS Microbiology Ecology</i> 81, 13–25. <a href="https://doi.org/10.1111/j.1574-6941.2011.01196.x">https://doi.org/10.1111/j.1574-6941.2011.01196.x</a>                                                                                     |
| 112   | Szép, A., Kohlheb, R., 2010. Water treatment technology for produced water. <i>Water Science and Technology</i> 62, 2372–2380. <a href="https://doi.org/10.2166/wst.2010.524">https://doi.org/10.2166/wst.2010.524</a>                                                                                                                                                                                                     |
| 113   | Tellez, G.T., Nirmalakhandan, N., 1992. Bioreclamation of Oilfield Produced Wastewater: Characterization and Feasibility Study, in: <i>Produced Water</i> . Plenum Press, New York, NY, pp. 523–533.                                                                                                                                                                                                                       |
| 114   | Tellez, G.T., Nirmalakhandan, N., Gardea-Torresdey, J.L., 2005. Comparison of purge and trap GC/MS and spectrophotometry for monitoring petroleum hydrocarbon degradation in oilfield produced waters. <i>Microchemical Journal</i> 81, 12–18. <a href="https://doi.org/10.1016/j.microc.2005.01.019">https://doi.org/10.1016/j.microc.2005.01.019</a>                                                                     |
| 115   | Thacker, J., Carlton, D., Hildenbrand, Z., Kadjo, A., Schug, K., 2015. Chemical Analysis of Wastewater from Unconventional Drilling Operations. <i>Water</i> 7, 1568–1579. <a href="https://doi.org/10.3390/w7041568">https://doi.org/10.3390/w7041568</a>                                                                                                                                                                 |
| 116   | Thiel, G.P., Lienhard, J.H., 2014. Treating produced water from hydraulic fracturing: Composition effects on scale formation and desalination system selection. <i>Desalination</i> 346, 54–69. <a href="https://doi.org/10.1016/j.desal.2014.05.001">https://doi.org/10.1016/j.desal.2014.05.001</a>                                                                                                                      |
| 117   | Thurman, E.M., Ferrer, I., Blotvogel, J., Borch, T., 2014. Analysis of Hydraulic Fracturing Flowback and Produced Waters Using Accurate Mass: Identification of Ethoxylated Surfactants. <i>Analytical Chemistry</i> 86, 9653–9661. <a href="https://doi.org/10.1021/ac502163k">https://doi.org/10.1021/ac502163k</a>                                                                                                      |
| 118   | Thurman, E.M., Ferrer, I., Rosenblum, J., Linden, K., Ryan, J.N., 2017. Identification of polypropylene glycols and polyethylene glycol carboxylates in flowback and produced water from hydraulic fracturing. <i>Journal of Hazardous Materials</i> 323, 11–17. <a href="https://doi.org/10.1016/j.jhazmat.2016.02.041">https://doi.org/10.1016/j.jhazmat.2016.02.041</a>                                                 |

SI Table 4b: Reference IDs

| RefId | Citation                                                                                                                                                                                                                                                                                                                                                                                  |
|-------|-------------------------------------------------------------------------------------------------------------------------------------------------------------------------------------------------------------------------------------------------------------------------------------------------------------------------------------------------------------------------------------------|
| 119   | U.S. EPA, 2016. "Data received from oil and gas exploration and production companies, including hydraulic fracturing service companies 2011 to 2013." Taken from Appendix H of "Hydraulic Fracturing for Oil and Gas: Impacts from the Hydraulic Fracturing Water Cycle on Drinking Water Resources in the United States" (No. EPA-600-R-16-236).                                         |
| 120   | Vikram, A., Lipus, D., Bibby, K., 2016. Metatranscriptome analysis of active microbial communities in produced water samples from the Marcellus Shale. <i>Microbial Ecology</i> 72, 571–581. <a href="https://doi.org/10.1007/s00248-016-0811-z">https://doi.org/10.1007/s00248-016-0811-z</a>                                                                                            |
| 121   | Vikram, A., Lipus, D., Bibby, K., 2014. Produced Water Exposure Alters Bacterial Response to Biocides. <i>Environmental Science &amp; Technology</i> 48, 13001–13009. <a href="https://doi.org/10.1021/es5036915">https://doi.org/10.1021/es5036915</a>                                                                                                                                   |
| 122   | Warner, N.R., Darrah, T.H., Jackson, R.B., Millot, R., Kloppmann, W., Vengosh, A., 2014. New Tracers Identify Hydraulic Fracturing Fluids and Accidental Releases from Oil and Gas Operations. <i>Environmental Science &amp; Technology</i> 48, 12552–12560. <a href="https://doi.org/10.1021/es5032135">https://doi.org/10.1021/es5032135</a>                                           |
| 123   | Warner, N.R., Kresse, T.M., Hays, P.D., Down, A., Karr, J.D., Jackson, R.B., Vengosh, A., 2013. Geochemical and isotopic variations in shallow groundwater in areas of the Fayetteville Shale development, north-central Arkansas. <i>Applied Geochemistry</i> 35, 207–220. <a href="https://doi.org/10.1016/j.apgeochem.2013.04.013">https://doi.org/10.1016/j.apgeochem.2013.04.013</a> |
| 124   | Wesolowski, D., Broughton, A., Hansotte, C.A., Koraido, S.M., Fillo, J.P., 1987. Characterization of Produced Waters from Natural Gas Production Operations (No. GRI-87/0335.3). Gas Research Institute, Chicago, Illinois.                                                                                                                                                               |
| 125   | Zhang, T., Hammack, R.W., Vidic, R.D., 2015. Fate of Radium in Marcellus Shale Flowback Water Impoundments and Assessment of Associated Health Risks. <i>Environmental Science &amp; Technology</i> 49, 9347–9354. <a href="https://doi.org/10.1021/acs.est.5b01393">https://doi.org/10.1021/acs.est.5b01393</a>                                                                          |
| 126   | Zielinski, R.A., Budahn, J.R., 2007. Mode of occurrence and environmental mobility of oil-field radioactive material at US Geological Survey research site B, Osage-Skiatook Project, northeastern Oklahoma. <i>Applied Geochemistry</i> 22, 2125–2137. <a href="https://doi.org/10.1016/j.apgeochem.2007.04.014">https://doi.org/10.1016/j.apgeochem.2007.04.014</a>                     |
| 127   | Ziemkiewicz, P.F., Quaranta, J.D., Darnell, A., Wise, R., 2014. Exposure pathways related to shale gas development and procedures for reducing environmental and public risk. <i>Journal of Natural Gas Science and Engineering</i> 16, 77–84. <a href="https://doi.org/10.1016/j.jngse.2013.11.003">https://doi.org/10.1016/j.jngse.2013.11.003</a>                                      |
| 128   | Ziemkiewicz, P.F., Thomas He, Y., 2015. Evolution of water chemistry during Marcellus Shale gas development: A case study in West Virginia. <i>Chemosphere</i> 134, 224–231. <a href="https://doi.org/10.1016/j.chemosphere.2015.04.040">https://doi.org/10.1016/j.chemosphere.2015.04.040</a>                                                                                            |
| 129   | Zolfaghari, A., Dehghanpour, H., Noel, M., Beringer, D., 2016. Laboratory and field analysis of flowback water from gas shales. <i>Journal of Unconventional Oil and Gas Resources</i> 14, 113–127. <a href="https://doi.org/10.1016/j.juogr.2016.03.004">https://doi.org/10.1016/j.juogr.2016.03.004</a>                                                                                 |

SI Table 4c: 1198 chemicals reported as being detected in produced water, summary data

| CAS #        | Name                                                        | Concentration data (Max Reported) | Units | FracFocus (2013-2017) | ToxvalDB | ToxVal (Restricted) | Priority Pollutant List | RCRA | NPDWS | Method exists? |
|--------------|-------------------------------------------------------------|-----------------------------------|-------|-----------------------|----------|---------------------|-------------------------|------|-------|----------------|
| 2157-01-9    | Octyl methacrylate                                          | Not Quantified                    |       |                       |          |                     |                         |      |       |                |
| 2207-01-4    | (Z)-1,2-Dimethylcyclohexane                                 | Not Quantified                    |       |                       | Yes      |                     |                         |      |       |                |
| 2272-03-9    | Butylidenecyclohexane                                       | Not Quantified                    |       |                       |          |                     |                         |      |       |                |
| 2274-11-5    | Ethylene acrylate                                           | Not Quantified                    |       |                       | Yes      |                     |                         |      |       |                |
| 2765-11-9    | Pentadecanal                                                | 0.0453                            | mg/L  |                       |          |                     |                         |      |       |                |
| 2883-02-5    | Cyclohexane, nonyl-                                         | Not Quantified                    |       |                       | Yes      |                     |                         |      |       |                |
| 2883-05-8    | Octane, 2-cyclohexyl-                                       | Not Quantified                    |       |                       |          |                     |                         |      |       |                |
| 2884-06-2    | 2,3-Dimethylnonane                                          | Not Quantified                    |       |                       |          |                     |                         |      |       |                |
| 2935-07-1    | 1H-Phenylene, dodecahydro-                                  | Not Quantified                    |       |                       |          |                     |                         |      |       |                |
| 4810-04-2    | 1,3,5-Trimethyl-2-propylbenzene                             | Not Quantified                    |       |                       |          |                     |                         |      |       |                |
| 4810-09-7    | 3-Methyl-1-heptene                                          | Not Quantified                    |       |                       |          |                     |                         |      |       |                |
| 5161-04-6    | Benzene, 1-methyl-4-(2-methylpropyl)-                       | Not Quantified                    |       |                       | Yes      |                     |                         |      |       |                |
| 5744-03-6    | 1H-Fluorene, dodecahydro-                                   | Not Quantified                    |       |                       |          |                     |                         |      |       |                |
| 5911-04-6    | 3-Methylnonane                                              | Not Quantified                    |       |                       | Yes      |                     |                         |      |       |                |
| 7440-09-7    | Potassium                                                   | 66000                             | mg/L  | Yes                   | Yes      |                     |                         |      |       | Yes            |
| 7446-09-5    | Sulfur dioxide                                              | 0.03225                           | mg/L  | Yes                   | Yes      |                     |                         |      |       | Yes            |
| 7783-06-4    | Hydrogen sulfide                                            | 600                               | mg/L  |                       | Yes      | Yes                 |                         |      |       | Yes            |
| 100-01-6     | 4-Nitroaniline                                              | 0.0026                            | mg/L  |                       | Yes      | Yes                 |                         | Yes  |       | Yes            |
| 10023-74-2   | Pentanoic acid, ion(1-)                                     | 1.51689                           | mg/L  |                       |          |                     |                         |      |       |                |
| 1002-43-3    | Undecane, 3-methyl-                                         | Not Quantified                    |       |                       |          |                     |                         |      |       |                |
| 1002-84-2    | Pentadecanoic acid                                          | 0.00084                           | mg/L  |                       | Yes      |                     |                         |      |       |                |
| 1003-64-1    | Cyclohexane, ethylidene-                                    | Not Quantified                    |       |                       |          |                     |                         |      |       |                |
| 100-41-4     | Ethylbenzene                                                | 4410                              | mg/L  | Yes                   | Yes      | Yes                 | Yes                     |      | Yes   | Yes            |
| 100-42-5     | Styrene                                                     | 52                                | mg/L  |                       | Yes      | Yes                 |                         | Yes  |       | Yes            |
| 10045-97-3   | Caesium-137                                                 | 9                                 | pCi/L |                       | Yes      |                     |                         |      |       | Yes            |
| 100463-01-2  | 2,4-Dimethyl-1,5-diazabicyclo[3.1.0]hexane (cis)            | Not Quantified                    |       |                       |          |                     |                         |      |       |                |
| 100-49-2     | Cyclohexanemethanol                                         | Not Quantified                    |       |                       | Yes      |                     |                         |      |       |                |
| 100-51-6     | Benzyl alcohol                                              | 0.34                              | mg/L  |                       | Yes      | Yes                 |                         |      |       | Yes            |
| 100-52-7     | Benzaldehyde                                                | Not Quantified                    |       | Yes                   | Yes      | Yes                 |                         |      |       | Yes            |
| 1008-80-6    | 2,3-Dimethyldecahydronaphthalene                            | Not Quantified                    |       |                       |          |                     |                         |      |       |                |
| 10098-97-2   | Strontium-90                                                | 70.7                              | pCi/L |                       | Yes      |                     |                         |      |       | Yes            |
| 1016165-79-9 | 1,2-Di-but-2-enyl-cyclohexane                               | 0.00077                           | mg/L  |                       |          |                     |                         |      |       |                |
| 101-81-5     | Diphenylmethane                                             | 0.00043                           | mg/L  |                       | Yes      |                     |                         |      |       |                |
| 10198-40-0   | Cobalt 60                                                   | Not Quantified                    |       |                       | Yes      |                     |                         |      |       | Yes            |
| 10222-95-4   | 5-Isopropyl-1,2,4-trimethylbenzene                          | Not Quantified                    |       |                       |          |                     |                         |      |       |                |
| 1024-57-3    | Heptachlor epoxide                                          | Not Quantified                    |       |                       | Yes      | Yes                 | Yes                     | Yes  | Yes   | Yes            |
| 10317-17-6   | Oxetane, 3-(1-methylethyl)-                                 | Not Quantified                    |       |                       |          |                     |                         |      |       |                |
| 103-40-2     | Benzylsuccinate                                             | 0.006871029                       | mg/L  |                       |          |                     |                         |      |       |                |
| 103-65-1     | Propylbenzene                                               | 1290                              | mg/L  |                       | Yes      | Yes                 |                         |      |       | Yes            |
| 10374-74-0   | 7-Tetradecene                                               | Not Quantified                    |       |                       |          |                     |                         |      |       |                |
| 10396-80-2   | 2,6-Di-tert-butyl-4-hydroxy-4-methyl-2,5-cyclohexadien-1-ol | Not Quantified                    |       |                       |          |                     |                         |      |       |                |
| 104-50-7     | 4-Octanolide                                                | Not Quantified                    |       |                       | Yes      |                     |                         |      |       |                |
| 104-51-8     | Butylbenzene                                                | 162                               | mg/L  |                       | Yes      | Yes                 |                         |      |       | Yes            |
| 104-61-0     | gamma-Nonanolactone                                         | Not Quantified                    |       |                       | Yes      |                     |                         |      |       |                |
| 104-76-7     | 2-Ethyl-1-hexanol                                           | 0.041                             | mg/L  | Yes                   | Yes      |                     |                         |      |       | Yes            |
| 10486-19-8   | Tridecanal                                                  | 0.0563                            | mg/L  |                       |          |                     |                         |      |       |                |
| 105-21-5     | 1,4-Heptanolide                                             | Not Quantified                    |       |                       | Yes      |                     |                         |      |       |                |
| 10522-26-6   | 2-Methyl-1-undecanol                                        | Not Quantified                    |       |                       |          |                     |                         |      |       |                |
| 10544-50-0   | Octasulfur                                                  | 0.009629866                       | mg/L  |                       |          |                     |                         |      |       |                |
| 10544-95-3   | Octadecane, 4-methyl-                                       | Not Quantified                    |       |                       |          |                     |                         |      |       |                |
| 105-60-2     | Caprolactam                                                 | 0.002392004                       | mg/L  |                       | Yes      | Yes                 |                         |      |       | Yes            |
| 105-67-9     | 2,4-Dimethylphenol                                          | 5                                 | mg/L  |                       | Yes      | Yes                 | Yes                     | Yes  |       | Yes            |
| 105882-89-1  | Ethanamine, 2,2'-azobis[N,N,1,1,2,2-hexafluoro-             | Not Quantified                    |       |                       |          |                     |                         |      |       |                |
| 10595-95-6   | N-Nitroso-N-methylethylamine                                | Not Quantified                    |       |                       | Yes      | Yes                 |                         | Yes  |       | Yes            |
| 106-21-8     | 3,7-Dimethyloctan-1-ol                                      | Not Quantified                    |       |                       | Yes      |                     |                         |      |       |                |

SI Table 4c: 1198 chemicals reported as being detected in produced water, summary data

| CAS #       | Name                                     | Concentration data<br>(Max Reported) | Units | FracFocus<br>(2013-2017) | ToxvalDB | ToxVal<br>(Restricted) | Priority Pollutant<br>List | RCRA | NPDWS | Method exists? |
|-------------|------------------------------------------|--------------------------------------|-------|--------------------------|----------|------------------------|----------------------------|------|-------|----------------|
| 106-35-4    | 3-Heptanone                              | Not Quantified                       |       |                          | Yes      |                        |                            |      |       |                |
| 106-42-3    | p-Xylene                                 | 0.46                                 | mg/L  |                          | Yes      |                        |                            |      | Yes   | Yes            |
| 106-44-5    | p-Cresol                                 | 0.3                                  | mg/L  |                          | Yes      | Yes                    |                            |      |       | Yes            |
| 106-46-7    | 1,4-Dichlorobenzene                      | 0.00034                              | mg/L  |                          | Yes      | Yes                    | Yes                        | Yes  | Yes   | Yes            |
| 106-51-4    | 1,4-Benzoquinone                         | 0.00008                              | mg/L  |                          | Yes      |                        |                            | Yes  |       | Yes            |
| 106-65-0    | Dimethyl succinate                       | 0.8914662                            | mg/L  | Yes                      | Yes      |                        |                            |      |       |                |
| 106-90-1    | Glycidyl acrylate                        | Not Quantified                       |       |                          | Yes      |                        |                            |      |       |                |
| 107-02-8    | Acrolein                                 | Not Quantified                       |       | Yes                      | Yes      | Yes                    | Yes                        | Yes  |       | Yes            |
| 107-13-1    | Acrylonitrile                            | Not Quantified                       |       | Yes                      | Yes      | Yes                    | Yes                        | Yes  |       | Yes            |
| 1072-05-5   | 2,6-Dimethylheptane                      | Not Quantified                       |       |                          | Yes      |                        |                            |      |       |                |
| 107-21-1    | Ethylene glycol                          | 290                                  | mg/L  | Yes                      | Yes      | Yes                    |                            |      |       | Yes            |
| 1074-43-7   | 1-Methyl-3-propylbenzene                 | Not Quantified                       |       |                          | Yes      |                        |                            |      |       |                |
| 1075-06-5   | Ethanone, 2,2-dihydroxy-1-phenyl-        | Not Quantified                       |       |                          |          |                        |                            |      |       |                |
| 1077-16-3   | Benzene, hexyl-                          | Not Quantified                       |       |                          |          |                        |                            |      |       |                |
| 107-83-5    | 2-Methylpentane                          | Not Quantified                       |       |                          | Yes      |                        |                            |      |       |                |
| 107-92-6    | Butanoic acid                            | 19                                   | mg/L  |                          | Yes      |                        |                            |      |       |                |
| 1079-71-6   | 1,2,3,4,5,6,7,8-Octahydroanthracene      | 0.00054                              | mg/L  |                          |          |                        |                            |      |       |                |
| 107997-59-1 | 1,2,3-Trimethyl-4-(3-methylbutyl)benzene | Not Quantified                       |       |                          |          |                        |                            |      |       |                |
| 108-10-1    | 4-Methyl-2-pentanone                     | 1.44                                 | mg/L  | Yes                      | Yes      | Yes                    |                            |      |       | Yes            |
| 1081-77-2   | 1-Phenylnonane                           | Not Quantified                       |       |                          |          |                        |                            |      |       |                |
| 108-29-2    | 4-Pentanolide                            | Not Quantified                       |       |                          | Yes      |                        |                            |      |       |                |
| 108-38-3    | m-Xylene                                 | 0.111                                | mg/L  | Yes                      | Yes      |                        |                            |      | Yes   | Yes            |
| 108-39-4    | m-Cresol                                 | Not Quantified                       |       |                          | Yes      | Yes                    |                            |      |       | Yes            |
| 108-67-8    | 1,3,5-Trimethylbenzene                   | 6250                                 | mg/L  | Yes                      | Yes      | Yes                    |                            |      |       | Yes            |
| 108837-05-4 | 4-Propyl-9H-xanthen-9-one                | 0.00007                              | mg/L  |                          |          |                        |                            |      |       |                |
| 108-87-2    | Methylcyclohexane                        | Not Quantified                       |       |                          | Yes      |                        |                            |      |       | Yes            |
| 108-88-3    | Toluene                                  | 16800                                | mg/L  | Yes                      | Yes      | Yes                    | Yes                        | Yes  | Yes   | Yes            |
| 108-90-7    | Chlorobenzene                            | 0.35                                 | mg/L  |                          | Yes      | Yes                    | Yes                        | Yes  | Yes   | Yes            |
| 108-91-8    | Cyclohexylamine                          | 0.034                                | mg/L  |                          | Yes      | Yes                    |                            |      |       | Yes            |
| 108-94-1    | Cyclohexanone                            | Not Quantified                       |       |                          | Yes      | Yes                    |                            |      |       | Yes            |
| 108-95-2    | Phenol                                   | 6.96                                 | mg/L  | Yes                      | Yes      | Yes                    |                            | Yes  |       | Yes            |
| 109-06-8    | 2-Methylpyridine                         | Not Quantified                       |       |                          | Yes      |                        |                            | Yes  |       | Yes            |
| 109-21-7    | Butyl butyrate                           | 0.00044                              | mg/L  |                          | Yes      |                        |                            |      |       |                |
| 109-52-4    | Pentanoic acid                           | Not Quantified                       |       |                          | Yes      |                        |                            |      |       |                |
| 109-66-0    | Pentane                                  | Not Quantified                       |       | Yes                      | Yes      | Yes                    |                            |      |       |                |
| 109-74-0    | Butanenitrile                            | Not Quantified                       |       |                          | Yes      |                        |                            |      |       |                |
| 110-27-0    | Isopropyl tetradecanoic acid             | 0.00179                              | mg/L  |                          | Yes      |                        |                            |      |       |                |
| 110-54-3    | n-Hexane                                 | Not Quantified                       |       | Yes                      | Yes      | Yes                    |                            |      |       | Yes            |
| 110-75-8    | 2-Chloroethyl vinyl ether                | 0.014                                | mg/L  |                          | Yes      |                        | Yes                        | Yes  |       | Yes            |
| 110-82-7    | Cyclohexane                              | 5.97                                 | mg/L  |                          | Yes      | Yes                    |                            |      |       | Yes            |
| 110-86-1    | Pyridine                                 | 0.28                                 | mg/L  |                          | Yes      | Yes                    |                            | Yes  |       | Yes            |
| 110-94-1    | Glutaric acid                            | 0.290653                             | mg/L  |                          | Yes      |                        |                            |      |       |                |
| 111-14-8    | Heptanoic acid                           | 0.3124488                            | mg/L  |                          | Yes      |                        |                            |      |       |                |
| 111-16-0    | Heptanedioic acid                        | 0.1441521                            | mg/L  |                          | Yes      |                        |                            |      |       |                |
| 111-27-3    | 1-Hexanol                                | Not Quantified                       |       |                          | Yes      |                        |                            |      |       |                |
| 111-30-8    | Glutaraldehyde                           | Not Quantified                       |       | Yes                      | Yes      | Yes                    |                            |      |       |                |
| 111-44-4    | Bis(2-chloroethyl) ether                 | Not Quantified                       |       | Yes                      | Yes      | Yes                    | Yes                        | Yes  |       | Yes            |
| 111-65-9    | Octane                                   | Not Quantified                       |       | Yes                      | Yes      |                        |                            |      |       |                |
| 111-67-1    | 2-Octene                                 | Not Quantified                       |       |                          |          |                        |                            |      |       |                |
| 111-76-2    | 2-Butoxyethanol                          | 77.5                                 | mg/L  | Yes                      | Yes      | Yes                    |                            |      |       | Yes            |
| 111-84-2    | Nonane                                   | Not Quantified                       |       | Yes                      | Yes      | Yes                    |                            |      |       |                |
| 1120-21-4   | Undecane                                 | 0.0113                               | mg/L  | Yes                      | Yes      |                        |                            |      |       |                |
| 112-05-0    | Nonanoic acid                            | Not Quantified                       |       |                          | Yes      |                        |                            |      |       |                |
| 112-18-5    | N,N-Dimethyldodecan-1-amine              | Not Quantified                       |       |                          | Yes      |                        |                            |      |       |                |
| 112-27-6    | Triethylene glycol                       | 17.8                                 | mg/L  | Yes                      | Yes      | Yes                    |                            |      |       |                |

SI Table 4c: 1198 chemicals reported as being detected in produced water, summary data

| CAS #       | Name                                                           | Concentration data (Max Reported) | Units | FracFocus (2013-2017) | ToxvalDB | ToxVal (Restricted) | Priority Pollutant List | RCRA | NPDWS | Method exists? |
|-------------|----------------------------------------------------------------|-----------------------------------|-------|-----------------------|----------|---------------------|-------------------------|------|-------|----------------|
| 112-30-1    | 1-Decanol                                                      | 0.0054                            | mg/L  | Yes                   | Yes      |                     |                         |      |       |                |
| 1123-09-7   | 2-Cyclohexen-1-one, 3,5-dimethyl-                              | Not Quantified                    |       |                       |          |                     |                         |      |       |                |
| 112-31-2    | Decanal                                                        | Not Quantified                    |       |                       | Yes      |                     |                         |      |       | Yes            |
| 112-34-5    | 2-(2-Butoxyethoxy)ethanol                                      | 0.00045                           | mg/L  | Yes                   | Yes      | Yes                 |                         |      |       |                |
| 112-37-8    | Undecanoic acid                                                | Not Quantified                    |       |                       | Yes      |                     |                         |      |       |                |
| 112-39-0    | Methyl hexadecanoate                                           | Not Quantified                    |       |                       | Yes      |                     |                         |      |       |                |
| 112-40-3    | Dodecane                                                       | 2.33                              | mg/L  | Yes                   | Yes      |                     |                         |      |       | Yes            |
| 112-41-4    | 1-Dodecene                                                     | Not Quantified                    |       | Yes                   | Yes      |                     |                         |      |       |                |
| 1124-25-0   | Cyclohexane, 1-methyl-4-(1-methylethenyl)-, trans-             | Not Quantified                    |       |                       |          |                     |                         |      |       |                |
| 1124-63-6   | 3-Cyclohexylpropan-1-ol                                        | Not Quantified                    |       |                       |          |                     |                         |      |       |                |
| 112-54-9    | Dodecanal                                                      | 0.0288                            | mg/L  |                       | Yes      |                     |                         |      |       |                |
| 112-62-9    | Methyl (9Z)-octadec-9-enoate                                   | Not Quantified                    |       |                       | Yes      |                     |                         |      |       |                |
| 112-70-9    | 1-Tridecanol                                                   | Not Quantified                    |       |                       | Yes      |                     |                         |      |       |                |
| 112-75-4    | N,N-Dimethyltetradecylamine                                    | Not Quantified                    |       |                       | Yes      |                     |                         |      |       |                |
| 112-88-9    | 1-Octadecene                                                   | 0.0463                            | mg/L  | Yes                   | Yes      |                     |                         |      |       |                |
| 112-89-0    | 1-Bromooctadecane                                              | Not Quantified                    |       |                       |          |                     |                         |      |       |                |
| 1129-29-9   | 1-Isopropenyl-3-isopropylbenzene                               | Not Quantified                    |       |                       |          |                     |                         |      |       |                |
| 112-95-8    | Eicosane                                                       | 0.222                             | mg/L  |                       | Yes      |                     |                         |      |       | Yes            |
| 1131-63-1   | 5,6,7,8-Tetrahydro-2-naphthoic acid                            | 0.002995655                       | mg/L  |                       |          |                     |                         |      |       |                |
| 113-21-3    | Lactate ion(1-)                                                | Not Quantified                    |       |                       | Yes      |                     |                         |      |       |                |
| 1137-00-4   | d,l-7-Azatriptophan                                            | Not Quantified                    |       |                       |          |                     |                         |      |       |                |
| 114482-57-4 | 4-Cyanophenyl 4-(3-butenyloxy)benzoate                         | Not Quantified                    |       |                       |          |                     |                         |      |       |                |
| 114774-79-7 | p-Nitrophenyl 1-azetidincarboxylate                            | Not Quantified                    |       |                       |          |                     |                         |      |       |                |
| 115-22-0    | 2-Butanone, 3-hydroxy-3-methyl-                                | Not Quantified                    |       |                       |          |                     |                         |      |       |                |
| 115-86-6    | Triphenyl phosphate                                            | 0.00677137                        | mg/L  |                       | Yes      |                     |                         |      |       | Yes            |
| 116164-06-8 | 3-Heptene, 2,2,3,5,6-pentamethyl-                              | Not Quantified                    |       |                       |          |                     |                         |      |       |                |
| 116-53-0    | 2-Methylbutanoic acid                                          | Not Quantified                    |       |                       | Yes      |                     |                         |      |       |                |
| 117-81-7    | Di(2-ethylhexyl) phthalate                                     | 0.042                             | mg/L  | Yes                   | Yes      | Yes                 | Yes                     | Yes  | Yes   | Yes            |
| 117-84-0    | Di-n-octyl phthalate                                           | 0.0093                            | mg/L  |                       | Yes      | Yes                 | Yes                     | Yes  | Yes   | Yes            |
| 118252-04-3 | 1-Hexyl-2-nitrocyclohexane                                     | Not Quantified                    |       |                       |          |                     |                         |      |       |                |
| 118-74-1    | Hexachlorobenzene                                              | 0.001                             | mg/L  |                       | Yes      | Yes                 | Yes                     | Yes  | Yes   | Yes            |
| 118-90-1    | 2-Methylbenzoic acid                                           | 0.21784                           | mg/L  |                       | Yes      |                     |                         |      |       |                |
| 1192-18-3   | (Z)-1,2-Dimethylcyclopentane                                   | Not Quantified                    |       |                       |          |                     |                         |      |       |                |
| 119296-91-2 | Methyl (4Z)-3,3-diphenylhex-4-enoate                           | 0.002                             | mg/L  |                       |          |                     |                         |      |       |                |
| 1193-79-9   | 5-Methyl-2-furylmethylketone                                   | Not Quantified                    |       |                       |          |                     |                         |      |       |                |
| 119-61-9    | Benzophenone                                                   | Not Quantified                    |       |                       | Yes      |                     |                         |      |       | Yes            |
| 119-64-2    | Tetralin                                                       | 0.00895                           | mg/L  |                       | Yes      |                     |                         |      |       |                |
| 119-65-3    | Isoquinoline                                                   | Not Quantified                    |       | Yes                   | Yes      |                     |                         |      |       | Yes            |
| 119736-96-8 | 1',4-Dihydroxy-7'-methoxy-2,3'-dimethyl-,(-)-[1,2'-binaphthyl] | Not Quantified                    |       |                       |          |                     |                         |      |       |                |
| 120-12-7    | Anthracene                                                     | 0.029                             | mg/L  |                       | Yes      | Yes                 | Yes                     |      |       | Yes            |
| 1203-17-4   | 2,3-Dihydro-1,1,2,3,3-pentamethyl-1H-indene                    | 0.00045                           | mg/L  |                       |          |                     |                         |      |       |                |
| 1205-39-6   | 2-Methyl-N-phenylaniline                                       | 0.00353                           | mg/L  |                       |          |                     |                         |      |       |                |
| 120-82-1    | 1,2,4-Trichlorobenzene                                         | 0.0015                            | mg/L  |                       | Yes      | Yes                 | Yes                     | Yes  | Yes   | Yes            |
| 120-83-2    | 2,4-Dichlorophenol                                             | Not Quantified                    |       |                       | Yes      | Yes                 | Yes                     | Yes  | Yes   | Yes            |
| 121-33-5    | 4-Hydroxy-3-methoxybenzaldehyde                                | 0.00431                           | mg/L  |                       | Yes      |                     |                         |      |       |                |
| 121-91-5    | 1,3-Benzenedicarboxylic acid                                   | 0.3821036                         | mg/L  |                       | Yes      |                     |                         |      |       |                |
| 122-20-3    | Triisopropanolamine                                            | Not Quantified                    |       | Yes                   | Yes      |                     |                         |      |       |                |
| 122-39-4    | Diphenylamine                                                  | 0.00373                           | mg/L  |                       | Yes      | Yes                 |                         | Yes  |       | Yes            |
| 122-66-7    | 1,2-Diphenylhydrazine                                          | Not Quantified                    |       |                       | Yes      | Yes                 | Yes                     | Yes  |       | Yes            |
| 122-84-9    | 2-Propanone, 1-(4-methoxyphenyl)-                              | Not Quantified                    |       |                       | Yes      |                     |                         |      |       |                |
| 123-05-7    | 2-Ethylhexanal                                                 | Not Quantified                    |       |                       | Yes      |                     |                         |      |       |                |
| 123-20-6    | Butanoic acid, ethenyl ester                                   | Not Quantified                    |       |                       | Yes      |                     |                         |      |       |                |
| 123-25-1    | Diethyl butanedioate                                           | 1.4109876                         | mg/L  |                       | Yes      |                     |                         |      |       |                |
| 123731-75-9 | 1-Allyl-3-methylindole-2-carbaldehyde                          | 0.00149                           | mg/L  |                       |          |                     |                         |      |       |                |
| 123-79-5    | Diocetyl hexanedioate                                          | Not Quantified                    |       |                       | Yes      |                     |                         |      |       |                |



SI Table 4c: 1198 chemicals reported as being detected in produced water, summary data

| CAS #       | Name                                                         | Concentration data<br>(Max Reported) | Units | FracFocus<br>(2013-2017) | ToxvalDB | ToxVal<br>(Restricted) | Priority Pollutant<br>List | RCRA | NPDWS | Method exists? |
|-------------|--------------------------------------------------------------|--------------------------------------|-------|--------------------------|----------|------------------------|----------------------------|------|-------|----------------|
| 123-86-4    | Butyl acetate                                                | 0.9                                  | mg/L  |                          | Yes      |                        |                            |      |       | Yes            |
| 123-91-1    | 1,4-Dioxane                                                  | 0.06                                 | mg/L  | Yes                      | Yes      | Yes                    |                            | Yes  |       | Yes            |
| 124-07-2    | Octanoic acid                                                | 0.08220198                           | mg/L  |                          | Yes      |                        |                            |      |       |                |
| 124-10-7    | Methyl tetradecanoate                                        | Not Quantified                       |       |                          | Yes      |                        |                            |      |       |                |
| 124-18-5    | Decane                                                       | 2.67                                 | mg/L  | Yes                      | Yes      | Yes                    |                            |      |       | Yes            |
| 1241-94-7   | 2-Ethylhexyl diphenyl phosphate                              | 0.00075                              | mg/L  |                          | Yes      |                        |                            |      |       |                |
| 124-25-4    | Tetradecanal                                                 | 0.0618                               | mg/L  |                          | Yes      |                        |                            |      |       |                |
| 124-38-9    | Carbon dioxide                                               | 634                                  | mg/L  | Yes                      | Yes      |                        |                            |      |       | Yes            |
| 124-48-1    | Chlorodibromomethane                                         | Not Quantified                       |       |                          | Yes      | Yes                    | Yes                        |      | Yes   | Yes            |
| 12587-46-1  | Alpha particle                                               | 123000                               | pCi/L |                          | Yes      |                        |                            |      |       | Yes            |
| 12587-47-2  | Beta particle                                                | 597600                               | pCi/L |                          | Yes      |                        |                            |      |       | Yes            |
| 12672-29-6  | Aroclor 1248                                                 | Not Quantified                       |       |                          | Yes      | Yes                    | Yes                        |      | Yes   | Yes            |
| 126-73-8    | Tributyl phosphate                                           | 0.01896                              | mg/L  | Yes                      | Yes      | Yes                    |                            |      |       | Yes            |
| 127-18-4    | Tetrachloroethylene                                          | 0.005                                | mg/L  |                          | Yes      | Yes                    | Yes                        | Yes  | Yes   | Yes            |
| 128-39-2    | 2,6-Di-tert-butylphenol                                      | Not Quantified                       |       |                          | Yes      |                        |                            |      |       |                |
| 129-00-0    | Pyrene                                                       | 0.23                                 | mg/L  |                          | Yes      | Yes                    | Yes                        |      |       | Yes            |
| 1300-71-6   | Dimethylphenol                                               | 1.45                                 | mg/L  |                          | Yes      |                        |                            |      |       |                |
| 13066-95-0  | 1,3-Benzenediol, 4-amino-                                    | Not Quantified                       |       |                          |          |                        |                            |      |       |                |
| 131-11-3    | Dimethyl phthalate                                           | 0.015                                | mg/L  |                          | Yes      | Yes                    | Yes                        | Yes  |       | Yes            |
| 13150-81-7  | 2,6-Dimethyldecane                                           | Not Quantified                       |       |                          |          |                        |                            |      |       |                |
| 13151-34-3  | 3-Methyldecane                                               | Not Quantified                       |       |                          | Yes      |                        |                            |      |       |                |
| 13151-35-4  | 5-Methyldecane                                               | Not Quantified                       |       |                          |          |                        |                            |      |       |                |
| 13151-63-8  | Cyclodecene, 1-methyl-, (E)-                                 | Not Quantified                       |       |                          |          |                        |                            |      |       |                |
| 13151-94-5  | 1,2-Dimethylcyclooctane                                      | Not Quantified                       |       |                          |          |                        |                            |      |       |                |
| 1319-77-3   | Cresol                                                       | 6.76                                 | mg/L  |                          | Yes      | Yes                    |                            | Yes  |       |                |
| 1321-94-4   | Methylnaphthalene                                            | 0.015553579                          | mg/L  |                          | Yes      |                        |                            |      |       |                |
| 13233-32-4  | Radium-224                                                   | 567.5675676                          | pCi/L |                          |          |                        |                            |      |       | Yes            |
| 132-64-9    | Dibenzofuran                                                 | 0.0036                               | mg/L  |                          | Yes      | Yes                    |                            |      |       | Yes            |
| 132-65-0    | Dibenzothiophene                                             | 0.0144                               | mg/L  |                          | Yes      | Yes                    |                            |      |       | Yes            |
| 13286-73-2  | 3-Ethyltridecane                                             | Not Quantified                       |       |                          |          |                        |                            |      |       |                |
| 13287-21-3  | 6-Methyltridecane                                            | Not Quantified                       |       |                          | Yes      |                        |                            |      |       |                |
| 13287-23-5  | 8-Methylheptadecane                                          | Not Quantified                       |       |                          |          |                        |                            |      |       |                |
| 13287-24-6  | 9-Methylnonadecane                                           | Not Quantified                       |       |                          |          |                        |                            |      |       |                |
| 1330-20-7   | Xylenes                                                      | 11                                   | mg/L  | Yes                      | Yes      | Yes                    |                            |      | Yes   | Yes            |
| 13432-25-2  | 3-hexanol, 2,4-dimethyl-                                     | Not Quantified                       |       |                          |          |                        |                            |      |       |                |
| 134-62-3    | DEET                                                         | Not Quantified                       |       |                          | Yes      | Yes                    |                            |      |       | Yes            |
| 13472-79-2  | 2-Hydroxy-5-iodopyridine                                     | Not Quantified                       |       |                          |          |                        |                            |      |       |                |
| 13485-66-0  | 2(1H)-Naphthalenone, 4a,5,6,7,8,8a-hexahydro-4a,8a-dimethyl- | Not Quantified                       |       |                          |          |                        |                            |      |       |                |
| 13494-80-9  | Tellurium                                                    | 0.429                                | mg/L  |                          | Yes      |                        |                            |      |       | Yes            |
| 135241-50-8 | Propanamide, 2-(4-isobutylphenyl)-N-(3,5-dinitrophenyl)-     | Not Quantified                       |       |                          |          |                        |                            |      |       |                |
| 135-98-8    | sec-Butylbenzene                                             | 270                                  | mg/L  |                          | Yes      | Yes                    |                            |      |       | Yes            |
| 13632-94-5  | 1,4-Diethyl-2-methylbenzene                                  | Not Quantified                       |       |                          |          |                        |                            |      |       |                |
| 136-83-4    | 2-Nonylphenol                                                | 0.00791                              | mg/L  |                          |          |                        |                            |      |       |                |
| 13726-52-8  | Diethyl N-(4-aminobenzoyl)-L-glutamate                       | Not Quantified                       |       |                          |          |                        |                            |      |       |                |
| 13833-20-0  | Amorphane                                                    | Not Quantified                       |       |                          |          |                        |                            |      |       |                |
| 13925-05-8  | Pyrazine, 2-methyl-5-(1-methylethyl)-                        | Not Quantified                       |       |                          | Yes      |                        |                            |      |       |                |
| 13943-77-6  | Naphthalene, 1,2,3,4,4a,5,6,7-octahydro-4a-methyl-           | Not Quantified                       |       |                          |          |                        |                            |      |       |                |
| 13966-00-2  | Potassium-40                                                 | 700                                  | pCi/L |                          |          |                        |                            |      |       | Yes            |
| 13966-02-4  | Beryllium-7                                                  | Not Quantified                       |       |                          |          |                        |                            |      |       |                |
| 13966-29-5  | Uranium 234                                                  | 22.1                                 | pCi/L |                          | Yes      |                        |                            |      |       | Yes            |
| 13967-63-0  | Scandium-46                                                  | Not Quantified                       |       |                          |          |                        |                            |      |       |                |
| 13981-52-7  | Polonium-210                                                 | 111.6216216                          | pCi/L |                          |          |                        |                            |      |       | Yes            |
| 13982-63-3  | Radium-226                                                   | 16920                                | pCi/L |                          | Yes      |                        |                            |      | Yes   | Yes            |
| 140-66-9    | 4-(1,1,3,3-Tetramethylbutyl)phenol                           | 0.018338478                          | mg/L  |                          | Yes      |                        |                            |      |       | Yes            |
| 14113-60-1  | rel-(1R,2S)-1,2-Diethylcyclohexadecane                       | Not Quantified                       |       |                          |          |                        |                            |      |       |                |

SI Table 4c: 1198 chemicals reported as being detected in produced water, summary data

| CAS #       | Name                                                         | Concentration data<br>(Max Reported) | Units | FracFocus<br>(2013-2017) | ToxvalDB | ToxVal<br>(Restricted) | Priority Pollutant<br>List | RCRA | NPDWS | Method exists? |
|-------------|--------------------------------------------------------------|--------------------------------------|-------|--------------------------|----------|------------------------|----------------------------|------|-------|----------------|
| 14123-41-2  | 3-Chloro-1,1,2,2-tetramethylcyclopropane                     | Not Quantified                       |       |                          |          |                        |                            |      |       |                |
| 14127-61-8  | Calcium ion                                                  | 41000                                | mg/L  |                          | Yes      |                        |                            |      |       | Yes            |
| 14158-27-1  | Strontium-89                                                 | Not Quantified                       |       |                          | Yes      |                        |                            |      |       | Yes            |
| 142132-75-0 | Propane, 1-(di-t-butylphosphino)-3-(2,4,6-tri-t-butylphenyl) | Not Quantified                       |       |                          |          |                        |                            |      |       |                |
| 14250-88-5  | 2,2-Dimethylvaleraldehyde                                    | Not Quantified                       |       |                          |          |                        |                            |      |       |                |
| 14255-04-0  | Lead-210                                                     | 310                                  | pCi/L |                          | Yes      |                        |                            |      |       | Yes            |
| 142-62-1    | Hexanoic acid                                                | 0.766656                             | mg/L  |                          | Yes      |                        |                            |      |       | Yes            |
| 14265-44-2  | Phosphate                                                    | 90                                   | mg/L  |                          | Yes      |                        |                            |      |       | Yes            |
| 14265-45-3  | Sulfite                                                      | 9.2                                  | mg/L  |                          | Yes      |                        |                            |      |       | Yes            |
| 14269-63-7  | Thorium 230                                                  | 9.37                                 | pCi/L |                          | Yes      |                        |                            |      |       |                |
| 14274-82-9  | Thorium 228                                                  | 595.1351351                          | pCi/L |                          | Yes      |                        |                            |      |       |                |
| 14276-95-0  | 1H-Indene, 2,3-dihydro-1,1,6-trimethyl-                      | Not Quantified                       |       |                          |          |                        |                            |      |       |                |
| 142-82-5    | Heptane                                                      | Not Quantified                       |       | Yes                      | Yes      | Yes                    |                            |      |       | Yes            |
| 143-07-7    | Dodecanoic acid                                              | 0.002517211                          | mg/L  |                          | Yes      |                        |                            |      |       |                |
| 143-08-8    | 1-Nonanol                                                    | Not Quantified                       |       |                          | Yes      |                        |                            |      |       |                |
| 14331-83-0  | Actinium 228                                                 | 2054.054054                          | pCi/L |                          | Yes      |                        |                            |      |       |                |
| 14331-85-2  | protactinium-231                                             | 240                                  | pCi/L |                          |          |                        |                            |      |       |                |
| 14339-23-2  | 1H-Pyrazole, 5-ethyl-4,5-dihydro-1,4-dimethyl-               | Not Quantified                       |       |                          |          |                        |                            |      |       |                |
| 14360-50-0  | 1-Hexanone, 1-(2-furanyl)-                                   | Not Quantified                       |       |                          | Yes      |                        |                            |      |       |                |
| 14383-50-7  | Thiosulfate                                                  | 19.05989                             | mg/L  |                          |          |                        |                            |      |       | Yes            |
| 14398-67-5  | Decalin, syn-1-methyl-, cis-                                 | Not Quantified                       |       |                          |          |                        |                            |      |       |                |
| 14398-71-1  | cis-Decalin, 2-syn-methyl-                                   | Not Quantified                       |       |                          |          |                        |                            |      |       |                |
| 144-19-4    | 2,2,4-Trimethyl-1,3-pentanediol                              | Not Quantified                       |       |                          | Yes      |                        |                            |      |       |                |
| 14449-42-4  | 1-sec-Butyladamantane                                        | Not Quantified                       |       |                          |          |                        |                            |      |       |                |
| 14451-87-7  | Tricyclo(3.3.1.13.7)decane, 2-ethyl-                         | Not Quantified                       |       |                          |          |                        |                            |      |       |                |
| 14451-88-8  | 2-n-Propyladamantane                                         | Not Quantified                       |       |                          |          |                        |                            |      |       |                |
| 1450-72-2   | 1-(2-Hydroxy-5-methylphenyl)ethanone                         | 0.00029                              | mg/L  |                          |          |                        |                            |      |       |                |
| 1454-84-8   | n-Nonadecanol-1                                              | Not Quantified                       |       |                          |          |                        |                            |      |       |                |
| 14676-29-0  | 3-Ethyl-2-methylheptane                                      | Not Quantified                       |       |                          | Yes      |                        |                            |      |       |                |
| 1468-39-9   | 2-Methylbutanoic anhydride                                   | Not Quantified                       |       |                          |          |                        |                            |      |       |                |
| 146919-79-1 | 5-Methyl-1-undecene                                          | Not Quantified                       |       |                          |          |                        |                            |      |       |                |
| 14701-22-5  | Nickel cation                                                | 19.2                                 | mg/L  |                          |          |                        |                            |      |       | Yes            |
| 14733-03-0  | Bismuth-214                                                  | 7330                                 | pCi/L |                          |          |                        |                            |      |       |                |
| 14797-55-8  | Nitrate                                                      | 2670                                 | mg/L  |                          | Yes      | Yes                    |                            |      | Yes   | Yes            |
| 14797-65-0  | Nitrite                                                      | 219                                  | mg/L  |                          | Yes      | Yes                    |                            |      | Yes   | Yes            |
| 14798-03-9  | Ammonium                                                     | 1469                                 | mg/L  |                          | Yes      |                        |                            |      |       | Yes            |
| 14808-79-8  | Sulfate                                                      | 9164                                 | mg/L  |                          | Yes      |                        |                            |      |       | Yes            |
| 1483-60-9   | 2,4-Dimethyl-1-(1-methylpropyl)benzene                       | Not Quantified                       |       |                          |          |                        |                            |      |       |                |
| 14859-67-7  | Radon 222                                                    | 139                                  | pCi/L |                          | Yes      |                        |                            |      |       |                |
| 1486-75-5   | cyclododecene, (e)-                                          | Not Quantified                       |       |                          |          |                        |                            |      |       |                |
| 14913-49-6  | Bismuth-212                                                  | 150                                  | pCi/L |                          |          |                        |                            |      |       |                |
| 14913-50-9  | Thallium-208                                                 | 0.4                                  | pCi/L |                          |          |                        |                            |      |       |                |
| 149-30-4    | 2-Mercaptobenzothiazole                                      | 0.00089                              | mg/L  |                          | Yes      | Yes                    |                            |      |       | Yes            |
| 14952-40-0  | Actinium-227                                                 | 2                                    | pCi/L |                          | Yes      |                        |                            |      |       |                |
| 149-57-5    | 2-Ethylhexanoic acid                                         | Not Quantified                       |       |                          | Yes      |                        |                            |      |       |                |
| 1502-38-1   | Cyclooctane, methyl-                                         | Not Quantified                       |       |                          |          |                        |                            |      |       |                |
| 15035-72-0  | Hydro sulfide                                                | 102.517                              | mg/L  |                          |          |                        |                            |      |       |                |
| 15065-10-8  | Thorium 234                                                  | 170                                  | pCi/L |                          | Yes      |                        |                            |      |       | Yes            |
| 15067-28-4  | Lead-214                                                     | 7350                                 | pCi/L |                          |          |                        |                            |      |       |                |
| 15092-94-1  | Lead-212                                                     | 64.86486486                          | pCi/L |                          |          |                        |                            |      |       |                |
| 15100-28-4  | Protactinium-234                                             | 1400                                 | pCi/L |                          |          |                        |                            |      |       |                |
| 15117-96-1  | Uranium-235                                                  | 40                                   | pCi/L |                          | Yes      |                        |                            |      |       | Yes            |
| 15123-40-7  | Pyreno[4,5-c]furan                                           | 0.00183                              | mg/L  |                          |          |                        |                            |      |       |                |
| 1522-22-1   | 1,1,1,5,5,5-Hexafluoroacetylacetone                          | Not Quantified                       |       |                          |          |                        |                            |      |       |                |
| 15229-37-5  | Bismuth-211                                                  | 2                                    | pCi/L |                          |          |                        |                            |      |       |                |

SI Table 4c: 1198 chemicals reported as being detected in produced water, summary data

| CAS #       | Name                                           | Concentration data (Max Reported) | Units          | FracFocus (2013-2017) | ToxvalDB | ToxVal (Restricted) | Priority Pollutant List | RCRA | NPDWS | Method exists? |
|-------------|------------------------------------------------|-----------------------------------|----------------|-----------------------|----------|---------------------|-------------------------|------|-------|----------------|
| 15232-78-7  | Cyclohexene,3-hexyl-                           | Not Quantified                    |                |                       |          |                     |                         |      |       |                |
| 15232-85-6  | Cyclohexene, 1-pentyl-                         | Not Quantified                    |                |                       |          |                     |                         |      |       |                |
| 15232-86-7  | 1-Heptylcyclohexene                            | Not Quantified                    |                |                       |          |                     |                         |      |       |                |
| 15262-20-1  | Radium-228                                     |                                   | 3089 pCi/L     |                       | Yes      |                     |                         |      | Yes   | Yes            |
| 1528-22-9   | Cyclobutane, (1-methylethylidene)-             | Not Quantified                    |                |                       |          |                     |                         |      |       |                |
| 15438-31-0  | Fe +2 ion                                      |                                   | 656.72544 mg/L |                       | Yes      |                     |                         |      |       | Yes            |
| 15496-01-2  | Ditrifluoromethyl(chlorocarbonyloxy)amine      | Not Quantified                    |                |                       |          |                     |                         |      |       |                |
| 1559-81-5   | 1-Methyltetraline                              |                                   | 0.00069 mg/L   |                       |          |                     |                         |      |       |                |
| 1560-88-9   | Octadecane, 2-methyl-                          | Not Quantified                    |                |                       |          |                     |                         |      |       |                |
| 1560-89-0   | Heptadecane, 2-methyl-                         | Not Quantified                    |                |                       |          |                     |                         |      |       |                |
| 1560-92-5   | 2-Methylhexadecane                             | Not Quantified                    |                |                       |          |                     |                         |      |       |                |
| 1560-93-6   | 2-Methylpentadecane                            | Not Quantified                    |                |                       |          |                     |                         |      |       |                |
| 1560-95-8   | 2-Methyltetradecane                            | Not Quantified                    |                |                       |          |                     |                         |      |       |                |
| 1560-96-9   | 2-Methyltridecane                              | Not Quantified                    |                |                       |          |                     |                         |      |       |                |
| 1560-97-0   | 2-Methyldodecane                               |                                   | 0.0097 mg/L    |                       |          |                     |                         |      |       |                |
| 15623-45-7  | Radium-223                                     |                                   | 2 pCi/L        |                       |          |                     |                         |      |       | Yes            |
| 15623-47-9  | Thorium 227                                    |                                   | 3 pCi/L        |                       | Yes      |                     |                         |      |       |                |
| 156-60-5    | (E)-1,2-Dichloroethylene                       |                                   | 0.005 mg/L     |                       | Yes      | Yes                 | Yes                     | Yes  | Yes   | Yes            |
| 1576-67-6   | 3,6-Dimethylphenanthrene                       |                                   | 0.000334 mg/L  |                       |          |                     |                         |      |       | Yes            |
| 15869-86-0  | 4-Ethylcane                                    | Not Quantified                    |                |                       | Yes      |                     |                         |      |       |                |
| 15869-93-9  | 3,5-Dimethyloctane                             | Not Quantified                    |                |                       | Yes      |                     |                         |      |       |                |
| 1595-10-4   | 1-Methyl-2-n-hexylbenzene                      | Not Quantified                    |                |                       |          |                     |                         |      |       |                |
| 1595-16-0   | 1-(Butan-2-yl)-4-methylbenzene                 | Not Quantified                    |                |                       |          |                     |                         |      |       |                |
| 1599-67-3   | 1-Docosene                                     |                                   | 0.00233 mg/L   |                       |          |                     |                         |      |       |                |
| 1606-08-2   | Cyclopentylcyclohexane                         | Not Quantified                    |                |                       |          |                     |                         |      |       |                |
| 16065-83-1  | Chromium (III)                                 |                                   | 0.0447 mg/L    |                       | Yes      | Yes                 |                         |      |       | Yes            |
| 160951-15-5 | 4,6,8-Trimethyl-2-propylazulene                |                                   | 0.0004 mg/L    |                       |          |                     |                         |      |       |                |
| 1618-22-0   | naphthalene, decahydro-2,6-dimethyl-           | Not Quantified                    |                |                       |          |                     |                         |      |       |                |
| 1620-98-0   | 3,5-Di-tert-butyl-4-hydroxybenzaldehyde        |                                   | 0.00042 mg/L   |                       |          |                     |                         |      |       |                |
| 1630-94-0   | 1,1-Dimethylcyclopropane                       | Not Quantified                    |                |                       |          |                     |                         |      |       |                |
| 1632-70-8   | Undecane, 5-methyl-                            | Not Quantified                    |                |                       |          |                     |                         |      |       |                |
| 1636-44-8   | Decane, 4-ethyl-                               | Not Quantified                    |                |                       |          |                     |                         |      |       |                |
| 1640-89-7   | Ethylcyclopentane                              | Not Quantified                    |                |                       | Yes      |                     |                         |      |       |                |
| 16538-89-9  | cyclooctane, (1-methylpropyl)-                 | Not Quantified                    |                |                       |          |                     |                         |      |       |                |
| 16580-24-8  | 1-Methyl-3-propan-2-ylcyclohexane              | Not Quantified                    |                |                       |          |                     |                         |      |       |                |
| 16580-26-0  | cyclohexane, 1-isopropyl-1-methyl-             | Not Quantified                    |                |                       |          |                     |                         |      |       |                |
| 1660-04-4   | Methyl tricyclo(3.3.1.1.3,7)dec-1-yl ketone    | Not Quantified                    |                |                       |          |                     |                         |      |       |                |
| 1667-00-1   | Benzylcyclopropane                             | Not Quantified                    |                |                       |          |                     |                         |      |       |                |
| 166773-56-4 | 2,3-Dimethyl-5-(2,6,10-trimethylundecyl) furan | Not Quantified                    |                |                       |          |                     |                         |      |       |                |
| 16681-68-8  | 2H-1,2,3-Triazole-4-carbaldehyde               | Not Quantified                    |                |                       |          |                     |                         |      |       |                |
| 1671-77-8   | 1-Pentanone, 1-(4-methylphenyl)-               | Not Quantified                    |                |                       |          |                     |                         |      |       |                |
| 1674-10-8   | Cyclohexene, 1,2-dimethyl-                     | Not Quantified                    |                |                       | Yes      |                     |                         |      |       |                |
| 16747-30-1  | 2,4,4-Trimethylhexane                          | Not Quantified                    |                |                       | Yes      |                     |                         |      |       |                |
| 16747-50-5  | Cyclopentane, 1-ethyl-1- methyl-               | Not Quantified                    |                |                       |          |                     |                         |      |       |                |
| 1678-91-7   | Ethylcyclohexane                               | Not Quantified                    |                |                       | Yes      |                     |                         |      |       |                |
| 1678-92-8   | Propylcyclohexane                              | Not Quantified                    |                |                       | Yes      |                     |                         |      |       |                |
| 1678-93-9   | Butylcyclohexane                               | Not Quantified                    |                |                       | Yes      |                     |                         |      |       |                |
| 1687-34-9   | 1-Ethyl-3-methyladamantane                     | Not Quantified                    |                |                       |          |                     |                         |      |       |                |
| 1687-35-0   | 1,3-Dimethyl-5-ethyladamantane                 | Not Quantified                    |                |                       |          |                     |                         |      |       |                |
| 1687-64-5   | Phenol, 2-ethyl-6-methyl-                      | Not Quantified                    |                |                       |          |                     |                         |      |       |                |
| 16887-00-6  | Chloride                                       |                                   | 380000 mg/L    | Yes                   | Yes      |                     |                         |      |       | Yes            |
| 1689-64-1   | Fluoren-9-ol                                   |                                   | 0.00032 mg/L   |                       | Yes      |                     |                         |      |       |                |
| 16984-48-8  | Fluoride                                       |                                   | 1100 mg/L      |                       | Yes      |                     |                         |      | Yes   | Yes            |
| 1703-51-1   | 2,5-Heptanedione                               | Not Quantified                    |                |                       |          |                     |                         |      |       |                |
| 17059-48-2  | 1H-Indene, 2,3-dihydro-1,6-dimethyl-           | Not Quantified                    |                |                       |          |                     |                         |      |       |                |

SI Table 4c: 1198 chemicals reported as being detected in produced water, summary data

| CAS #       | Name                                                | Concentration data (Max Reported) | Units | FracFocus (2013-2017) | ToxvalDB | ToxVal (Restricted) | Priority Pollutant List | RCRA | NPDWS | Method exists? |
|-------------|-----------------------------------------------------|-----------------------------------|-------|-----------------------|----------|---------------------|-------------------------|------|-------|----------------|
| 1718-52-1   | Perdeuteriopyrene                                   | 0.0011                            | mg/L  |                       |          |                     |                         |      |       |                |
| 17301-23-4  | 2,6-Dimethylundecane                                | 0.2018                            | mg/L  |                       |          |                     |                         |      |       |                |
| 17301-26-7  | 2,9-Dimethylundecane                                | Not Quantified                    |       |                       |          |                     |                         |      |       |                |
| 17301-27-8  | 2,10-Dimethylundecane                               | Not Quantified                    |       |                       |          |                     |                         |      |       |                |
| 17301-28-9  | 3,6-Dimethylundecane                                | Not Quantified                    |       |                       | Yes      |                     |                         |      |       |                |
| 17301-32-5  | 4,7-Dimethylundecane                                | Not Quantified                    |       |                       |          |                     |                         |      |       |                |
| 17301-94-9  | 4-Methylnonane                                      | Not Quantified                    |       |                       | Yes      |                     |                         |      |       |                |
| 17302-23-7  | Nonane, 4,5-dimethyl-                               | Not Quantified                    |       |                       |          |                     |                         |      |       |                |
| 17302-27-1  | Nonane, 2,5-dimethyl-                               | Not Quantified                    |       |                       |          |                     |                         |      |       |                |
| 17302-28-2  | Nonane, 2,6-dimethyl-                               | Not Quantified                    |       |                       |          |                     |                         |      |       |                |
| 17302-32-8  | 3,7-Dimethylnonane                                  | Not Quantified                    |       |                       |          |                     |                         |      |       |                |
| 17302-33-9  | 6-Methylundecane                                    | Not Quantified                    |       |                       |          |                     |                         |      |       |                |
| 1730-37-6   | 1-Methylfluorene                                    | 0.00051                           | mg/L  |                       |          |                     |                         |      |       | Yes            |
| 17312-50-4  | 2,5-Dimethyldecane                                  | Not Quantified                    |       |                       |          |                     |                         |      |       |                |
| 17312-53-7  | 3,6-Dimethyldecane                                  | Not Quantified                    |       |                       | Yes      |                     |                         |      |       |                |
| 17312-54-8  | 3,7-Dimethyldecane                                  | Not Quantified                    |       |                       |          |                     |                         |      |       |                |
| 17312-55-9  | 3,8-Dimethyldecane                                  | Not Quantified                    |       |                       |          |                     |                         |      |       |                |
| 17312-57-1  | 3-Methyldodecane                                    | 0.0049                            | mg/L  |                       | Yes      |                     |                         |      |       |                |
| 17312-59-3  | Undecane, 4-ethyl-                                  | Not Quantified                    |       |                       |          |                     |                         |      |       |                |
| 17312-60-6  | Undecane, 6-ethyl-                                  | Not Quantified                    |       |                       |          |                     |                         |      |       |                |
| 17312-62-8  | 5-Propyldecane                                      | Not Quantified                    |       |                       |          |                     |                         |      |       |                |
| 17312-77-5  | 2,3-Dimethylundecane                                | Not Quantified                    |       |                       |          |                     |                         |      |       |                |
| 17312-80-0  | 2,4-Dimethylundecane                                | Not Quantified                    |       |                       |          |                     |                         |      |       |                |
| 17312-81-1  | 3,5-Dimethylundecane                                | Not Quantified                    |       |                       |          |                     |                         |      |       |                |
| 17341-25-2  | Sodium ion                                          | 130000                            | mg/L  |                       |          |                     |                         |      |       | Yes            |
| 17429-36-6  | 2-Cyclohexen-1-one, 4-methyl-4-phenyl-              | Not Quantified                    |       |                       |          |                     |                         |      |       |                |
| 17453-94-0  | Undecane, 5-ethyl-                                  | Not Quantified                    |       |                       |          |                     |                         |      |       |                |
| 1746-23-2   | 4-tert-Butylstyrene                                 | Not Quantified                    |       |                       | Yes      |                     |                         |      |       |                |
| 1750-51-2   | Naphthalene, decahydro-1,6-dimethyl-                | Not Quantified                    |       |                       |          |                     |                         |      |       |                |
| 1758-88-9   | 2-Ethyl-p-xylene                                    | 0.3469                            | mg/L  |                       | Yes      |                     |                         |      |       |                |
| 176-63-6    | Spiro(4-5)decane                                    | Not Quantified                    |       |                       |          |                     |                         |      |       |                |
| 1768-36-1   | Propyl cyanate                                      | Not Quantified                    |       |                       |          |                     |                         |      |       |                |
| 17720-63-7  | N,N,O-Triacetylhydroxylamine                        | Not Quantified                    |       |                       |          |                     |                         |      |       |                |
| 17851-53-5  | Butyl isobutyl phthalate                            | Not Quantified                    |       |                       |          |                     |                         |      |       |                |
| 1786-12-5   | 1,7,11-Trimethyl-4-(1-methylethyl)cyclotetradecane  | Not Quantified                    |       |                       |          |                     |                         |      |       |                |
| 1795-15-9   | Cyclohexane, octyl-                                 | Not Quantified                    |       |                       | Yes      |                     |                         |      |       |                |
| 1795-16-0   | Decylcyclohexane                                    | Not Quantified                    |       |                       | Yes      |                     |                         |      |       |                |
| 179601-23-1 | m,p-Xylene                                          | 46000                             | mg/L  |                       | Yes      |                     |                         |      |       | Yes            |
| 180-43-8    | Spiro(5.5)undecane                                  | Not Quantified                    |       |                       |          |                     |                         |      |       |                |
| 18294-04-7  | Ethanedioic acid, bis(trimethylsilyl) ester         | Not Quantified                    |       |                       |          |                     |                         |      |       |                |
| 18344-37-1  | heptadecane, 2,6,10,14-tetramethyl-                 | Not Quantified                    |       |                       |          |                     |                         |      |       |                |
| 1839-63-0   | 1,3,5-Trimethylcyclohexane                          | Not Quantified                    |       |                       | Yes      |                     |                         |      |       |                |
| 18420-41-2  | 2-(Chloromethyl)tetrahydropyran                     | Not Quantified                    |       |                       |          |                     |                         |      |       |                |
| 18435-22-8  | Tetradecane, 3-methyl-                              | Not Quantified                    |       |                       |          |                     |                         |      |       |                |
| 18435-45-5  | 1-Nonadecene                                        | 0.00215                           | mg/L  |                       |          |                     |                         |      |       |                |
| 18496-25-8  | Sulfide                                             | 7700                              | mg/L  |                       | Yes      |                     |                         |      |       | Yes            |
| 1849-76-9   | 3-bromo-5-chloro-4-hydroxybenzaldehyde              | Not Quantified                    |       |                       |          |                     |                         |      |       |                |
| 18540-29-9  | Chromium (VI) ion                                   | 5.4                               | mg/L  |                       | Yes      | Yes                 |                         |      |       | Yes            |
| 1871-67-6   | 2-Octenoic acid                                     | Not Quantified                    |       |                       |          |                     |                         |      |       |                |
| 1879-07-8   | Cyclohexane, 1-methyl-4-(1-methylethenyl)-, cis-    | Not Quantified                    |       |                       |          |                     |                         |      |       |                |
| 18835-32-0  | 1-Tricosene                                         | Not Quantified                    |       |                       |          |                     |                         |      |       |                |
| 18835-33-1  | 1-Hexacosene                                        | 0.00204                           | mg/L  |                       |          |                     |                         |      |       |                |
| 188645-81-0 | 3,4-Dichlorophenol, tert-butyl(dimethylsilyl) ether | Not Quantified                    |       |                       |          |                     |                         |      |       |                |
| 1888-57-9   | 3-Hexanone, 2,5-dimethyl- (8Cl)(9Cl)                | Not Quantified                    |       |                       |          |                     |                         |      |       |                |
| 191-24-2    | Benzo(g,h,i)perylene                                | 0.0015                            | mg/L  |                       | Yes      |                     | Yes                     |      |       | Yes            |

SI Table 4c: 1198 chemicals reported as being detected in produced water, summary data

| CAS #       | Name                                                   | Concentration data (Max Reported) | Units | FracFocus (2013-2017) | ToxvalDB | ToxVal (Restricted) | Priority Pollutant List | RCRA | NPDWS | Method exists? |
|-------------|--------------------------------------------------------|-----------------------------------|-------|-----------------------|----------|---------------------|-------------------------|------|-------|----------------|
| 1921-70-6   | Norphytane                                             | 0.0952                            | mg/L  |                       |          |                     |                         |      |       |                |
| 19218-94-1  | 1-Iodotetradecane                                      | Not Quantified                    |       |                       |          |                     |                         |      |       |                |
| 19219-84-2  | benzene, (1,3-dimethylbutyl)-                          | Not Quantified                    |       |                       |          |                     |                         |      |       |                |
| 19261-13-3  | 1-(2-Furanyl)-3-butene-1,2-diol                        | Not Quantified                    |       |                       |          |                     |                         |      |       |                |
| 193-39-5    | Indeno(1,2,3-cd)pyrene                                 | 0.022                             | mg/L  |                       | Yes      | Yes                 | Yes                     | Yes  |       | Yes            |
| 19385-87-6  | 1,3-Dimethyl-5-n-propyl-adamantane                     | Not Quantified                    |       |                       |          |                     |                         |      |       |                |
| 19549-87-2  | 2,4-Dimethyl-1-heptene                                 | Not Quantified                    |       |                       |          |                     |                         |      |       |                |
| 19550-75-5  | 2,2-dimethyl-3-heptene trans                           | Not Quantified                    |       |                       |          |                     |                         |      |       |                |
| 19744-64-0  | 1H-Indene, octahydro-5-methyl-                         | Not Quantified                    |       |                       |          |                     |                         |      |       |                |
| 19781-34-1  | 3-ethyl-3-phenyl-1-pentene                             | Not Quantified                    |       |                       |          |                     |                         |      |       |                |
| 19781-86-3  | 8-Hexadecyne                                           | 0.00028                           | mg/L  |                       |          |                     |                         |      |       |                |
| 198-55-0    | Perylene                                               | Not Quantified                    |       |                       | Yes      |                     |                         |      |       | Yes            |
| 1985-59-7   | 1,1-Dimethyl(1,2,3,4-tetrahydronaphthalene)            | Not Quantified                    |       |                       |          |                     |                         |      |       |                |
| 1985-88-2   | 4-Chloro-2-methyl-2-butanol                            | Not Quantified                    |       |                       |          |                     |                         |      |       |                |
| 1985-97-3   | (3-methylpentan-3-yl)benzene                           | Not Quantified                    |       |                       |          |                     |                         |      |       |                |
| 2027-17-0   | 2-Isopropyl-naphthalene                                | Not Quantified                    |       |                       |          |                     |                         |      |       | Yes            |
| 20278-89-1  | Heptane, 3,4,5-trimethyl-                              | Not Quantified                    |       |                       |          |                     |                         |      |       |                |
| 20291-73-0  | Dimethylphenanthrene                                   | 0.00149                           | mg/L  |                       |          |                     |                         |      |       |                |
| 20309-77-7  | Cyclopentane, 1,1,3,4-tetramethyl-, trans-             | Not Quantified                    |       |                       |          |                     |                         |      |       |                |
| 20396-49-0  | tert-Butyl cyclohexanecarboxyperoxyate                 | Not Quantified                    |       |                       |          |                     |                         |      |       |                |
| 2040-96-2   | Propylcyclopentane                                     | Not Quantified                    |       |                       | Yes      |                     |                         |      |       |                |
| 204781-73-7 | 28-Nor-17alpha(H)-hopane                               | 0.00126                           | mg/L  |                       |          |                     |                         |      |       |                |
| 2049-95-8   | tert-Pentylbenzene                                     | Not Quantified                    |       |                       | Yes      |                     |                         |      |       |                |
| 2051-30-1   | 2,6-Dimethyloctane                                     | Not Quantified                    |       |                       | Yes      |                     |                         |      |       |                |
| 20524-86-1  | Bis(dichloromethyl) ether                              | Not Quantified                    |       |                       |          |                     |                         |      |       |                |
| 205-82-3    | Benzo(j)fluoranthene                                   | Not Quantified                    |       |                       | Yes      | Yes                 |                         | Yes  |       | Yes            |
| 205-99-2    | Benzo(b)fluoranthene                                   | 0.006                             | mg/L  |                       | Yes      | Yes                 | Yes                     | Yes  |       | Yes            |
| 20633-03-8  | 2,2,5-Trimethylhexane-3,4-dione                        | Not Quantified                    |       |                       |          |                     |                         |      |       |                |
| 206-44-0    | Fluoranthene                                           | 0.035                             | mg/L  |                       | Yes      | Yes                 | Yes                     | Yes  |       | Yes            |
| 207-08-9    | Benzo(k)fluoranthene                                   | 0.0049                            | mg/L  |                       | Yes      | Yes                 |                         | Yes  |       | Yes            |
| 2082-59-9   | valeric anhydride                                      | Not Quantified                    |       |                       |          |                     |                         |      |       |                |
| 208-96-8    | Acenaphthylene                                         | 0.11                              | mg/L  |                       | Yes      |                     | Yes                     |      |       | Yes            |
| 20959-33-5  | Heptadecane, 7-methyl-                                 | Not Quantified                    |       |                       |          |                     |                         |      |       |                |
| 2103-57-3   | 2,3,4-Trimethoxybenzaldehyde                           | 0.00039                           | mg/L  |                       |          |                     |                         |      |       |                |
| 21195-59-5  | 1,5,8-p-Menthatriene                                   | Not Quantified                    |       |                       |          |                     |                         |      |       |                |
| 2131-41-1   | 1,4,5-Trimethylnaphthalene                             | Not Quantified                    |       |                       |          |                     |                         |      |       |                |
| 2131-42-2   | 1,4,6-Trimethylnaphthalene                             | Not Quantified                    |       |                       |          |                     |                         |      |       |                |
| 21524-26-5  | Cyclohexene, 4-butyl-                                  | Not Quantified                    |       |                       |          |                     |                         |      |       |                |
| 21693-54-9  | 5,7-Dimethyltetralin                                   | Not Quantified                    |       |                       |          |                     |                         |      |       |                |
| 21693-55-0  | 1,5,7-Trimethyl-1,2,3,4-tetrahydronaphthalene          | Not Quantified                    |       |                       |          |                     |                         |      |       |                |
| 218-01-9    | Chrysene                                               | 0.11                              | mg/L  |                       | Yes      | Yes                 | Yes                     | Yes  |       | Yes            |
| 21868-43-9  | s-Triazine, 2-amino-4-(piperidinomethyl)-4-piperidino- | Not Quantified                    |       |                       |          |                     |                         |      |       |                |
| 2189-60-8   | Benzene, octyl-                                        | Not Quantified                    |       |                       |          |                     |                         |      |       |                |
| 219783-06-9 | 1-Isopropyl-1,4,5-trimethylcyclohexane                 | Not Quantified                    |       |                       |          |                     |                         |      |       |                |
| 22052-84-2  | Heptafluoroisopropyl methyl ether                      | Not Quantified                    |       |                       |          |                     |                         |      |       |                |
| 22089-89-0  | 7-pentadecyne                                          | Not Quantified                    |       |                       |          |                     |                         |      |       |                |
| 2213-23-2   | 2,4-Dimethylheptane                                    | Not Quantified                    |       |                       | Yes      |                     |                         |      |       |                |
| 2216-33-3   | 3-Methyloctane                                         | Not Quantified                    |       |                       | Yes      |                     |                         |      |       |                |
| 2216-34-4   | 4-Methyloctane                                         | Not Quantified                    |       |                       | Yes      |                     |                         |      |       |                |
| 2234-20-0   | 2,4-Dimethylstyrene                                    | Not Quantified                    |       |                       |          |                     |                         |      |       |                |
| 2234-75-5   | 1,2,4-Trimethylcyclohexane                             | Not Quantified                    |       |                       |          |                     |                         |      |       |                |
| 2245-38-7   | 1,6,7-Trimethylnaphthalene                             | Not Quantified                    |       |                       | Yes      |                     |                         |      |       | Yes            |
| 22531-20-0  | 6-Ethyl-1,2,3,4-tetrahydronaphthalene                  | Not Quantified                    |       |                       |          |                     |                         |      |       |                |
| 22537-38-8  | Rubidium, ion (Rb1+)                                   | 0.038                             | mg/L  |                       |          |                     |                         |      |       |                |
| 227327-87-9 | N-Adamantan-1-ylmethyl-2-chloro-5-nitro-benzamide      | Not Quantified                    |       |                       |          |                     |                         |      |       |                |

SI Table 4c: 1198 chemicals reported as being detected in produced water, summary data

| CAS #       | Name                                                     | Concentration data<br>(Max Reported) | Units | FracFocus<br>(2013-2017) | ToxvalDB | ToxVal<br>(Restricted) | Priority Pollutant<br>List | RCRA | NPDWS | Method exists? |
|-------------|----------------------------------------------------------|--------------------------------------|-------|--------------------------|----------|------------------------|----------------------------|------|-------|----------------|
| 228729-94-0 | 8,13-Dimethyl-14-(3-methylbutyl)podocarpene              | 0.00175                              | mg/L  |                          |          |                        |                            |      |       |                |
| 2292-79-7   | Congressane                                              | Not Quantified                       |       |                          |          |                        |                            |      |       |                |
| 2294-72-6   | 5-Undecyne                                               | Not Quantified                       |       |                          |          |                        |                            |      |       |                |
| 23051-84-5  | 5-Tridecene, (5E)-                                       | Not Quantified                       |       |                          |          | Yes                    |                            |      |       |                |
| 2315-61-9   | 2-[2-[4-(1,1,3,3-Tetramethylbutyl)phenoxy]ethoxy]ethanol | 0.00134                              | mg/L  |                          | Yes      |                        |                            |      |       |                |
| 23183-11-1  | 1,1'-Bicycloheptyl                                       | Not Quantified                       |       |                          |          |                        |                            |      |       |                |
| 23342-25-8  | 2,2,5,7-Tetramethyltetralin                              | Not Quantified                       |       |                          |          |                        |                            |      |       |                |
| 23609-46-3  | cyclooctane, 1,2-diethyl-                                | Not Quantified                       |       |                          |          |                        |                            |      |       |                |
| 2363-88-4   | 2,4-Decadienal                                           | Not Quantified                       |       |                          |          |                        |                            |      |       |                |
| 2381-21-7   | 1-Methylpyrene                                           | 0.0000477                            | mg/L  |                          | Yes      |                        |                            |      |       | Yes            |
| 2385-77-5   | (3R)-3,7-Dimethyloct-6-enal                              | Not Quantified                       |       |                          |          |                        |                            |      |       |                |
| 2399-48-6   | Tetrahydrofurfuryl acrylate                              | Not Quantified                       |       |                          |          |                        |                            |      |       |                |
| 2406-25-9   | Di-tert-butyl nitroxide                                  | Not Quantified                       |       |                          |          |                        |                            |      |       |                |
| 24145-88-8  | (E)-1,4-Dimethyladamantane                               | Not Quantified                       |       |                          |          |                        |                            |      |       |                |
| 24145-89-9  | (Z)-1,4-Dimethyladamantane                               | Not Quantified                       |       |                          |          |                        |                            |      |       |                |
| 2416-20-8   | hexadecenoic acid, z-11-                                 | Not Quantified                       |       |                          |          |                        |                            |      |       |                |
| 243-38-9    | 5H-Quinindoline                                          | Not Quantified                       |       |                          |          |                        |                            |      |       |                |
| 2435-85-0   | Hexadecahydropyrene                                      | Not Quantified                       |       |                          |          |                        |                            |      |       |                |
| 2437-56-1   | 1-Tridecene                                              | Not Quantified                       |       |                          | Yes      |                        |                            |      |       |                |
| 2440-22-4   | 2-(2H-Benzotriazol-2-yl)-4-methylphenol                  | 0.00091                              | mg/L  |                          | Yes      |                        |                            |      |       |                |
| 24451-17-0  | ethyl 2-(3,4-dimethylanilino)-2-oxoacetate               | Not Quantified                       |       |                          |          |                        |                            |      |       |                |
| 2453-00-1   | 1,3-Dimethylcyclopentane                                 | Not Quantified                       |       |                          | Yes      |                        |                            |      |       |                |
| 24624-29-1  | 1-Ethyl-9,10-anthraquinone                               | 0.00012                              | mg/L  |                          |          |                        |                            |      |       |                |
| 2471-83-2   | 1-Ethylidene-1H-indene                                   | Not Quantified                       |       |                          |          |                        |                            |      |       |                |
| 2471-84-3   | 1-Methylene-1H-indene                                    | Not Quantified                       |       |                          |          |                        |                            |      |       |                |
| 24959-67-9  | Bromide                                                  | 13600                                | mg/L  |                          | Yes      |                        |                            |      |       | Yes            |
| 2499-95-8   | Hexyl acrylate                                           | Not Quantified                       |       |                          | Yes      |                        |                            |      |       |                |
| 25117-24-2  | 4-Methyltetradecane                                      | Not Quantified                       |       |                          |          |                        |                            |      |       |                |
| 25117-31-1  | 5-Methyltridecane                                        | Not Quantified                       |       |                          |          |                        |                            |      |       |                |
| 25117-32-2  | 5-Methyltetradecane                                      | Not Quantified                       |       |                          |          |                        |                            |      |       |                |
| 25117-35-5  | Octadecane, 5-methyl-                                    | Not Quantified                       |       |                          |          |                        |                            |      |       |                |
| 25167-82-2  | Trichlorophenol                                          | Not Quantified                       |       |                          | Yes      |                        |                            |      |       | Yes            |
| 25167-94-6  | Diphenylpropane                                          | 0.00022                              | mg/L  |                          |          |                        |                            |      |       |                |
| 25201-40-5  | 1,6-Heptadien-4-ol, 4-methyl-                            | Not Quantified                       |       |                          |          |                        |                            |      |       |                |
| 2531-84-2   | 2-Methylphenanthrene                                     | Not Quantified                       |       |                          |          |                        |                            |      |       |                |
| 25322-68-3  | Polyethylene glycol                                      | 16                                   | mg/L  | Yes                      | Yes      |                        |                            |      |       | Yes            |
| 25322-69-4  | Polypropylene glycol                                     | Not Quantified                       |       | Yes                      | Yes      |                        |                            |      |       | Yes            |
| 25377-73-5  | 3-(Dodecenyldihydro-2,5-furandione                       | 0.00116                              | mg/L  |                          | Yes      |                        |                            |      |       |                |
| 25414-22-6  | 2-Methoxyfuran                                           | Not Quantified                       |       |                          |          |                        |                            |      |       |                |
| 25415-84-3  | Butanoic acid, 2-ethylhexyl ester                        | 0.0004                               | mg/L  |                          |          |                        |                            |      |       |                |
| 2541-75-5   | 8-heptadecanol                                           | Not Quantified                       |       |                          |          |                        |                            |      |       |                |
| 25419-33-4  | naphthalene, 1,2,3,4-tetrahydro-1,8-dimethyl-            | Not Quantified                       |       |                          |          |                        |                            |      |       |                |
| 25447-95-4  | Hexadecenoic acid                                        | 0.008368372                          | mg/L  |                          |          |                        |                            |      |       |                |
| 2547-26-4   | 4a-Methyldecalin                                         | Not Quantified                       |       |                          |          |                        |                            |      |       |                |
| 25524-42-9  | 5-Tridecene, (Z)-                                        | Not Quantified                       |       |                          |          |                        |                            |      |       |                |
| 25551-13-7  | Trimethylbenzene                                         | Not Quantified                       |       | Yes                      | Yes      |                        |                            |      |       | Yes            |
| 2566-97-4   | 9,12-octadecadienoic acid, methyl ester, (e,e)-          | Not Quantified                       |       |                          |          |                        |                            |      |       |                |
| 25711-30-2  | 1H-Pyrazole-4-carboxaldehyde, 1,5-dimethyl-              | Not Quantified                       |       |                          |          |                        |                            |      |       |                |
| 26321-98-2  | Cyclohexane, (1-ethylpropyl)-                            | Not Quantified                       |       |                          |          |                        |                            |      |       |                |
| 26429-11-8  | 4-Methylheptadecane                                      | Not Quantified                       |       |                          |          |                        |                            |      |       |                |
| 2658-24-4   | 2,2-Dimethylaziridine                                    | 0.0002                               | mg/L  |                          |          |                        |                            |      |       |                |
| 26603-23-6  | Bis(octylphenyl)amine                                    | 0.00019                              | mg/L  |                          |          |                        |                            |      |       |                |
| 26730-12-1  | 4-Methyltridecane                                        | Not Quantified                       |       |                          |          |                        |                            |      |       |                |
| 26730-14-3  | 7-Methyltridecane                                        | Not Quantified                       |       |                          |          |                        |                            |      |       |                |
| 26730-20-1  | 7-Methylhexadecane                                       | Not Quantified                       |       |                          |          |                        |                            |      |       |                |

SI Table 4c: 1198 chemicals reported as being detected in produced water, summary data

| CAS #       | Name                                                         | Concentration data (Max Reported) | Units | FracFocus (2013-2017) | ToxvalDB | ToxVal (Restricted) | Priority Pollutant List | RCRA | NPDWS | Method exists? |
|-------------|--------------------------------------------------------------|-----------------------------------|-------|-----------------------|----------|---------------------|-------------------------|------|-------|----------------|
| 26746-38-3  | 2,3-di-tert-butylphenol                                      | Not Quantified                    |       |                       |          |                     |                         |      |       |                |
| 26761-40-0  | Diisodecyl phthalate                                         | Not Quantified                    |       |                       | Yes      |                     |                         |      |       |                |
| 26764-26-1  | Octadecenoic acid                                            | 0.003472104                       | mg/L  |                       |          |                     |                         |      |       |                |
| 2682-20-4   | 2-Methyl-3(2H)-isothiazolone                                 | 9.51                              | mg/L  | Yes                   | Yes      |                     |                         |      |       |                |
| 268543-19-7 | 1-Ethanone, 1-(1-adamantyl)-2-phenyl-                        | Not Quantified                    |       |                       |          |                     |                         |      |       |                |
| 26967-64-6  | Cyclohexane, (1-methylpropyl)-                               | Not Quantified                    |       |                       |          |                     |                         |      |       |                |
| 2717-39-7   | 1,4,5,8-Tetramethylnaphthalene                               | Not Quantified                    |       |                       |          |                     |                         |      |       |                |
| 272-16-2    | 1,2-Benzisothiazole                                          | Not Quantified                    |       |                       |          |                     |                         |      |       |                |
| 274691-67-7 | Dithiocarbaminic acid, N-cyano-, S-[3-(4-ethylphenyl)-3-oxo- | Not Quantified                    |       |                       |          |                     |                         |      |       |                |
| 27519-02-4  | (Z)-9-Tricosene                                              | 0.00098                           | mg/L  |                       | Yes      |                     |                         |      |       |                |
| 27530-79-6  | Simonellite                                                  | 0.00068                           | mg/L  |                       |          |                     |                         |      |       |                |
| 27554-26-3  | Diisooctyl phthalate                                         | Not Quantified                    |       |                       | Yes      |                     |                         |      |       |                |
| 27601-00-9  | Methylquinoline                                              | 0.003749272                       | mg/L  |                       |          |                     |                         |      |       |                |
| 276890-11-0 | 5-(1,1-Dimethylethyl)-1H-indene                              | 0.0001                            | mg/L  |                       |          |                     |                         |      |       |                |
| 27875-89-4  | 1-Phenanthrenecarboxylic acid                                | 0.00012                           | mg/L  |                       |          |                     |                         |      |       |                |
| 28071-99-0  | trans-anti-trans-tetra-decahydroanthracene                   | Not Quantified                    |       |                       |          |                     |                         |      |       |                |
| 2809-64-5   | Naphthalene, 1,2,3,4-tetrahydro-5-methyl-                    | Not Quantified                    |       |                       |          |                     |                         |      |       |                |
| 281-23-2    | Adamantane                                                   | 74                                | mg/L  |                       | Yes      |                     |                         |      |       |                |
| 2815-57-8   | 1,2,3-Trimethylcyclopentane                                  | Not Quantified                    |       |                       |          |                     |                         |      |       |                |
| 2815-58-9   | 1,2,4-Trimethylcyclopentane                                  | Not Quantified                    |       |                       | Yes      |                     |                         |      |       |                |
| 2847-72-5   | 4-Methyldecane                                               | Not Quantified                    |       |                       | Yes      |                     |                         |      |       |                |
| 2855-19-8   | 1,2-Epoxydodecane                                            | Not Quantified                    |       |                       | Yes      |                     |                         |      |       |                |
| 286-20-4    | Cyclohexene oxide                                            | Not Quantified                    |       |                       | Yes      |                     |                         |      |       |                |
| 28652-72-4  | Methyl-1,1'-biphenyl                                         | 0.00213067                        | mg/L  |                       |          |                     |                         |      |       |                |
| 286-63-5    | 9-Thiabicyclo[6.1.0]nonane                                   | Not Quantified                    |       |                       |          |                     |                         |      |       |                |
| 28804-88-8  | Dimethylnaphthalene                                          | 0.009506014                       | mg/L  |                       | Yes      |                     |                         |      |       |                |
| 2882-96-4   | pentadecane, 3-methyl-                                       | Not Quantified                    |       |                       | Yes      |                     |                         |      |       |                |
| 2882-98-6   | n-Nonylcyclopentane                                          | Not Quantified                    |       |                       |          |                     |                         |      |       |                |
| 2885-00-9   | 1-Octadecanethiol                                            | Not Quantified                    |       |                       |          |                     |                         |      |       |                |
| 2896-60-8   | 4-Ethylresorcinol                                            | Not Quantified                    |       |                       |          |                     |                         |      |       |                |
| 28980-74-7  | 3,5-Dodecadiene, 2-methyl-                                   | Not Quantified                    |       |                       |          |                     |                         |      |       |                |
| 28981-49-9  | Ethylcyclododecane                                           | 0.00154                           | mg/L  |                       |          |                     |                         |      |       |                |
| 29053-04-1  | Cyclopentane, 1-methyl-3-(2-methylpropyl)-                   | Not Quantified                    |       |                       |          |                     |                         |      |       |                |
| 294-62-2    | Cyclododecane                                                | Not Quantified                    |       |                       | Yes      |                     |                         |      |       |                |
| 295-02-3    | Cyclotridecane                                               | Not Quantified                    |       |                       |          |                     |                         |      |       |                |
| 295-17-0    | Cyclotetradecane                                             | Not Quantified                    |       |                       |          |                     |                         |      |       |                |
| 295-48-7    | Cyclopentadecane                                             | Not Quantified                    |       |                       |          |                     |                         |      |       |                |
| 2958-76-1   | Decahydro-2-methylnaphthalene                                | Not Quantified                    |       |                       |          |                     |                         |      |       |                |
| 296-56-0    | Cycloeicosane                                                | Not Quantified                    |       |                       |          |                     |                         |      |       |                |
| 297-35-8    | Cyclotriacontane                                             | 0.00108                           | mg/L  |                       |          |                     |                         |      |       |                |
| 29799-19-7  | Cyclohexane, 1-(1,5-dimethylhexyl)-4-methyl-                 | Not Quantified                    |       |                       |          |                     |                         |      |       |                |
| 298-02-2    | Phorate                                                      | Not Quantified                    |       |                       | Yes      | Yes                 |                         | Yes  |       | Yes            |
| 2980-69-0   | 4-Methylundecane                                             | Not Quantified                    |       |                       |          |                     |                         |      |       |                |
| 30159-17-2  | Tricyclo[7.3.0.0(2,6)]dodecane, trans-anti-trans-            | Not Quantified                    |       |                       |          |                     |                         |      |       |                |
| 30232-26-9  | Trimethylphenanthrene                                        | 0.00012                           | mg/L  |                       | Yes      |                     |                         |      |       |                |
| 3031-15-0   | 1,2,3,4-Tetramethylnaphthalene                               | Not Quantified                    |       |                       |          |                     |                         |      |       |                |
| 30316-17-7  | 1,2,3,4-Tetrahydro-2,5,8-trimethylnaphthalene                | Not Quantified                    |       |                       |          |                     |                         |      |       |                |
| 3055-93-4   | 2-[2-(Dodecyloxy)ethoxy]ethanol                              | Not Quantified                    |       |                       |          |                     |                         |      |       |                |
| 3055-94-5   | Triethylene glycol monododecyl ether                         | Not Quantified                    |       |                       |          |                     |                         |      |       |                |
| 30654-45-6  | Naphthalene, 6-butyl-1,2,3,4-tetrahydro-                     | Not Quantified                    |       |                       |          |                     |                         |      |       |                |
| 30677-34-0  | Cyclohexane, ethylmethyl-                                    | Not Quantified                    |       |                       |          |                     |                         |      |       |                |
| 3073-66-3   | 1,1,3-Trimethylcyclohexane                                   | Not Quantified                    |       |                       | Yes      |                     |                         |      |       |                |
| 3074-71-3   | 2,3-Dimethylheptane                                          | Not Quantified                    |       |                       | Yes      |                     |                         |      |       |                |
| 307-55-1    | Perfluorododecanoic acid                                     | Not Quantified                    |       |                       | Yes      |                     |                         |      |       | Yes            |
| 309-00-2    | Aldrin                                                       | Not Quantified                    |       |                       | Yes      | Yes                 | Yes                     | Yes  |       | Yes            |

SI Table 4c: 1198 chemicals reported as being detected in produced water, summary data

| CAS #       | Name                                                       | Concentration data (Max Reported) | Units | FracFocus (2013-2017) | ToxvalDB | ToxVal (Restricted) | Priority Pollutant List | RCRA | NPDWS | Method exists? |
|-------------|------------------------------------------------------------|-----------------------------------|-------|-----------------------|----------|---------------------|-------------------------|------|-------|----------------|
| 309735-29-3 | 1,2-Benzisothiazole, 3-(hexahydro-1H-azepin-1-yl)-, 1,1-di | 0.00066                           | mg/L  |                       |          |                     |                         |      |       |                |
| 31061-61-7  | Tricyclo[4.3.1.1(3,8)]undecane-3-carboxylic acid, methyl e | Not Quantified                    |       |                       |          |                     |                         |      |       |                |
| 31295-56-4  | 2,6,11-Trimethyldodecane                                   | Not Quantified                    |       |                       |          |                     |                         |      |       |                |
| 3147-55-5   | Benzoic acid, 3,5-dibromo-2-hydroxy-                       | Not Quantified                    |       |                       |          |                     |                         |      |       |                |
| 315244-85-0 | Pyrazolo[3,4-b]pyran-5-carbonitrile, 1,4-dihydro-6-amino-4 | Not Quantified                    |       |                       |          |                     |                         |      |       |                |
| 3178-23-2   | Dicyclohexylmethane                                        | Not Quantified                    |       |                       |          |                     |                         |      |       |                |
| 319-85-7    | beta-Hexachlorocyclohexane                                 | Not Quantified                    |       |                       | Yes      | Yes                 | Yes                     |      |       | Yes            |
| 319-86-8    | delta-Hexachlorocyclohexane                                | 0.00048                           | mg/L  |                       | Yes      |                     | Yes                     |      |       | Yes            |
| 32038-83-8  | 2-Propynenitrile, 3-fluoro-                                | 0.00018                           | mg/L  |                       |          |                     |                         |      |       |                |
| 3221-61-2   | 2-Methyloctane                                             | Not Quantified                    |       |                       | Yes      |                     |                         |      |       |                |
| 32367-54-7  | Naphthalene, 2-ethyl-1,2,3,4-tetrahydro-                   | Not Quantified                    |       |                       |          |                     |                         |      |       |                |
| 3282-53-9   | Cyclohexene, 1-butyl-                                      | Not Quantified                    |       |                       |          |                     |                         |      |       |                |
| 331835-05-3 | 1-(2,4-Dihydroxybenzoyl)-3-ethyl-5-trifluoromethyl-5-hydro | Not Quantified                    |       |                       |          |                     |                         |      |       |                |
| 33213-65-9  | Endosulfan II                                              | Not Quantified                    |       |                       | Yes      |                     |                         |      |       | Yes            |
| 3333-52-6   | Tetramethylsuccinonitrile                                  | Not Quantified                    |       |                       | Yes      |                     |                         |      |       |                |
| 334-48-5    | Decanoic acid                                              | Not Quantified                    |       |                       | Yes      |                     |                         |      |       |                |
| 337503-48-7 | 4-Pentenoic acid, 2,2-diethyl-3-oxo-5-phenyl-, ethyl ester | Not Quantified                    |       |                       |          |                     |                         |      |       |                |
| 3386-33-2   | Octadecyl chloride                                         | 0.00212                           | mg/L  |                       | Yes      |                     |                         |      |       |                |
| 33933-74-3  | 3-Heptene, 4-ethyl-                                        | Not Quantified                    |       |                       |          |                     |                         |      |       |                |
| 3404-73-7   | 1-Pentene, 3,3-dimethyl-                                   | Not Quantified                    |       |                       | Yes      |                     |                         |      |       |                |
| 3430-33-9   | 2,6-Dimethyl-3-pyridylamine                                | Not Quantified                    |       |                       |          |                     |                         |      |       |                |
| 34303-81-6  | 3-Hexadecene, (Z)-                                         | Not Quantified                    |       |                       |          |                     |                         |      |       |                |
| 343270-50-8 | 2-(Butyliden-2-one)tetrahydrofuran                         | Not Quantified                    |       |                       |          |                     |                         |      |       |                |
| 34694-70-7  | 1,3,5,6-Tetramethyladamantane                              | Not Quantified                    |       |                       |          |                     |                         |      |       |                |
| 35216-11-6  | 7-Tetradecyne                                              | 0.00038                           | mg/L  |                       |          |                     |                         |      |       |                |
| 352-70-5    | m-Fluorotoluene                                            | Not Quantified                    |       |                       | Yes      |                     |                         |      |       |                |
| 35354-38-2  | 7-Octadecyne, 2-methyl-                                    | Not Quantified                    |       |                       |          |                     |                         |      |       |                |
| 35365-59-4  | 9-Octadecyne                                               | Not Quantified                    |       |                       |          |                     |                         |      |       |                |
| 36947-68-9  | 1H-Imidazole, 2-(1-methylethyl)-                           | Not Quantified                    |       |                       |          |                     |                         |      |       |                |
| 371-40-4    | 4-Fluoroaniline                                            | Not Quantified                    |       |                       | Yes      |                     |                         |      |       |                |
| 3726-46-3   | 1-Ethyl-2-methylcyclopentane                               | Not Quantified                    |       |                       |          |                     |                         |      |       |                |
| 3728-54-9   | 1-Ethyl-2-methylcyclohexane                                | Not Quantified                    |       |                       |          |                     |                         |      |       |                |
| 3728-55-0   | 1-Ethyl-3-methylcyclohexane                                | Not Quantified                    |       |                       |          |                     |                         |      |       |                |
| 3728-56-1   | 1-Ethyl-4-methylcyclohexane                                | Not Quantified                    |       |                       | Yes      |                     |                         |      |       |                |
| 376-77-2    | Decafluorocyclopentane                                     | Not Quantified                    |       |                       |          |                     |                         |      |       |                |
| 3777-69-3   | 2-Pentylfuran                                              | Not Quantified                    |       |                       | Yes      |                     |                         |      |       |                |
| 3777-70-6   | 2-Hexylfuran                                               | Not Quantified                    |       |                       |          |                     |                         |      |       |                |
| 3777-71-7   | Furan, 2-heptyl-                                           | Not Quantified                    |       |                       | Yes      |                     |                         |      |       |                |
| 3812-32-6   | Carbonate                                                  | 17000                             | mg/L  |                       | Yes      |                     |                         |      |       | Yes            |
| 38274-72-5  | (Z)-4-Ethyl-5-octyl-2,2-bis(trifluoromethyl)-1,3-dioxolane | Not Quantified                    |       |                       |          |                     |                         |      |       |                |
| 38489-80-4  | Benzaldehyde, 3-methoxy-, oxime                            | Not Quantified                    |       |                       |          |                     |                         |      |       |                |
| 3877-19-8   | Naphthalene, 1,2,3,4-tetrahydro-2-methyl-                  | Not Quantified                    |       |                       |          |                     |                         |      |       |                |
| 3891-98-3   | 2,6,10-Trimethyldodecane                                   | 0.00096                           | mg/L  |                       | Yes      |                     |                         |      |       |                |
| 3892-00-0   | 2,6,10-Trimethylpentadecane                                | Not Quantified                    |       |                       |          |                     |                         |      |       |                |
| 39178-69-3  | 3-butylcyclohexanone                                       | Not Quantified                    |       |                       |          |                     |                         |      |       |                |
| 39546-79-7  | Pentylidenecyclohexane                                     | Not Quantified                    |       |                       |          |                     |                         |      |       |                |
| 4013-34-7   | (1-Methoxyethyl)benzene                                    | Not Quantified                    |       |                       |          |                     |                         |      |       |                |
| 4032-93-3   | heptane, 2,3,6-trimethyl-                                  | Not Quantified                    |       |                       | Yes      |                     |                         |      |       |                |
| 40650-41-7  | 1,1,5-Trimethylindan                                       | Not Quantified                    |       |                       |          |                     |                         |      |       |                |
| 40710-32-5  | Nonahexacontanoic acid                                     | Not Quantified                    |       |                       |          |                     |                         |      |       |                |
| 4132-72-3   | Benzene, 1,4-dimethyl-2-(1-methylethyl)-                   | Not Quantified                    |       |                       |          |                     |                         |      |       |                |
| 41446-57-5  | 3-Tridecene, (3E)-                                         | Not Quantified                    |       |                       |          |                     |                         |      |       |                |
| 41446-59-7  | 2-tridecene, (z)-                                          | Not Quantified                    |       |                       |          |                     |                         |      |       |                |
| 41446-60-0  | 7-Tetradecene, (Z)-                                        | Not Quantified                    |       |                       |          |                     |                         |      |       |                |
| 41446-65-5  | 4-Tetradecene, (Z)-                                        | Not Quantified                    |       |                       |          |                     |                         |      |       |                |



SI Table 4c: 1198 chemicals reported as being detected in produced water, summary data

| CAS #       | Name                                                         | Concentration data (Max Reported) | Units       | FracFocus (2013-2017) | ToxvalDB | ToxVal (Restricted) | Priority Pollutant List | RCRA | NPDWS | Method exists? |
|-------------|--------------------------------------------------------------|-----------------------------------|-------------|-----------------------|----------|---------------------|-------------------------|------|-------|----------------|
| 41446-66-6  | 5-tetradecene, (e)-                                          | Not Quantified                    |             |                       | Yes      |                     |                         |      |       |                |
| 41446-68-8  | 3-Tetradecene, (E)-                                          | Not Quantified                    |             |                       |          |                     |                         |      |       |                |
| 41446-78-0  | 4-Tetradecene, (4E)-                                         | Not Quantified                    |             |                       |          |                     |                         |      |       |                |
| 4175-53-5   | 1H-Indene, 2,3-dihydro-1,3-dimethyl-                         | Not Quantified                    |             |                       |          |                     |                         |      |       |                |
| 4175-54-6   | Naphthalene, 1,2,3,4-tetrahydro-1,4-dimethyl-                | Not Quantified                    |             |                       |          |                     |                         |      |       |                |
| 41977-45-1  | Bicyclo[4.1.0]heptane, 7-pentyl-                             | Not Quantified                    |             |                       |          |                     |                         |      |       |                |
| 41977-48-4  | bicyclo[4.1.0]heptane, 3-methyl-7-pentyl-                    | Not Quantified                    |             |                       |          |                     |                         |      |       |                |
| 4218-48-8   | Benzene, 1-ethyl-4-(1-methylethyl)-                          | Not Quantified                    |             |                       |          |                     |                         |      |       |                |
| 4237-46-1   | Benzoyldiphenylmethanol                                      | Not Quantified                    |             |                       |          |                     |                         |      |       |                |
| 42775-75-7  | naphthalene, 5-ethyl-1,2,3,4-tetrahydro-                     | Not Quantified                    |             |                       |          |                     |                         |      |       |                |
| 42775-77-9  | 6-n-Propyltetralin                                           | Not Quantified                    |             |                       |          |                     |                         |      |       |                |
| 4282-44-4   | Undecane, 1-iodo-                                            | Not Quantified                    |             |                       |          |                     |                         |      |       |                |
| 4291-79-6   | 1-Methyl-2-propyl-cyclohexane                                | Not Quantified                    |             |                       |          |                     |                         |      |       |                |
| 4292-75-5   | Hexylcyclohexane                                             | Not Quantified                    |             |                       | Yes      |                     |                         |      |       |                |
| 4292-92-6   | Pentylcyclohexane                                            | Not Quantified                    |             |                       | Yes      |                     |                         |      |       |                |
| 4306-65-4   | 1,1,3,5-Tetramethylcyclohexane                               | Not Quantified                    |             |                       |          |                     |                         |      |       |                |
| 432-04-2    | Phosphine, tris(trifluoromethyl)-                            | Not Quantified                    |             |                       |          |                     |                         |      |       |                |
| 4359-46-0   | 1,3-Dioxolane, 2-ethyl-4-methyl-                             | Not Quantified                    |             |                       |          |                     |                         |      |       |                |
| 4360-57-0   | 2-Pentadecyl-1,3-dioxolane                                   | Not Quantified                    |             |                       |          |                     |                         |      |       |                |
| 4413-16-5   | Benzene, (1-cyclohexylethyl)-                                | Not Quantified                    |             |                       |          |                     |                         |      |       |                |
| 4413-21-2   | 1,1-Dicyclopentylethane                                      | Not Quantified                    |             |                       |          |                     |                         |      |       |                |
| 442662-72-8 | 2-Ethyl-1,1,3-trimethylcyclohexane                           | Not Quantified                    |             |                       |          |                     |                         |      |       |                |
| 4431-89-4   | (Cyclopentylmethyl)cyclohexane                               | Not Quantified                    |             |                       |          |                     |                         |      |       |                |
| 4453-90-1   | 1,4-Dihydro-1,4-methanonaphthalene                           | Not Quantified                    |             |                       |          |                     |                         |      |       |                |
| 4457-00-5   | Cyclopentane, hexyl-                                         | Not Quantified                    |             |                       |          |                     |                         |      |       |                |
| 4461-48-7   | 4-Methyl-2-pentene                                           | Not Quantified                    |             |                       |          |                     |                         |      |       |                |
| 4466-77-7   | 1,2,3,4-Tetramethylphenanthrene                              | 0.00068 mg/L                      |             |                       |          |                     |                         |      |       |                |
| 4516-69-2   | 1,1,3-Trimethylcyclopentane                                  | Not Quantified                    |             |                       | Yes      |                     |                         |      |       |                |
| 4551-51-3   | 1H-Indene, octahydro-, cis-                                  | Not Quantified                    |             |                       |          |                     |                         |      |       |                |
| 461-55-2    | Butyrate                                                     |                                   | 3 mg/L      |                       |          |                     |                         |      |       |                |
| 4674-23-1   | 1,2-Di(2,4,6-trimethylphenyl)ethane                          | Not Quantified                    |             |                       |          |                     |                         |      |       |                |
| 4701-36-4   | Benzene, (1-ethyl-1-propenyl)-                               | Not Quantified                    |             |                       |          |                     |                         |      |       |                |
| 4706-90-5   | 1,3-Dimethyl-5-isopropylbenzene                              | Not Quantified                    |             |                       |          |                     |                         |      |       |                |
| 471-34-1    | Carbonic acid calcium salt (1:1)                             |                                   | 103026 mg/L | Yes                   | Yes      |                     |                         |      |       | Yes            |
| 47145-46-0  | 3,4-Dihydroisouquinolin-7-ol, 1-[4-hydroxybenzyl]-6-methoxy- | Not Quantified                    |             |                       |          |                     |                         |      |       |                |
| 475-03-6    | 1,2,3,4-Tetrahydro-1,1,6-trimethylnaphthalene                | Not Quantified                    |             |                       |          |                     |                         |      |       |                |
| 480-72-8    | Acenaphthylene, 1,2,2a,3,4,5-hexahydro-                      | Not Quantified                    |             |                       |          |                     |                         |      |       |                |
| 48134-26-5  | 2,4,6-Trimethylazulene                                       | 0.00049 mg/L                      |             |                       |          |                     |                         |      |       |                |
| 483-65-8    | Retene                                                       | 0.00319 mg/L                      |             |                       | Yes      |                     |                         |      |       |                |
| 483-78-3    | Cadalene                                                     | 0.00032 mg/L                      |             |                       |          |                     |                         |      |       |                |
| 489-20-3    | 1-Isopropyl-2,3-dimethylcyclopentane                         | Not Quantified                    |             |                       |          |                     |                         |      |       |                |
| 490-65-3    | 1-Methyl-7-isopropyl-naphthalene                             | Not Quantified                    |             |                       |          |                     |                         |      |       |                |
| 4912-92-9   | 1,1-Dimethylindan                                            | Not Quantified                    |             |                       |          |                     |                         |      |       |                |
| 4920-99-4   | Benzene, 1-ethyl-3-(1-methylethyl)-                          | Not Quantified                    |             |                       |          |                     |                         |      |       |                |
| 493-02-7    | Naphthalene, decahydro-, trans-                              | Not Quantified                    |             |                       | Yes      |                     |                         |      |       |                |
| 4957-14-6   | 1-Methyl-4-[(4-methylphenyl)methyl]benzene                   | 0.00011 mg/L                      |             |                       | Yes      |                     |                         |      |       |                |
| 496-11-7    | Indan                                                        | 0.0096 mg/L                       |             |                       | Yes      |                     |                         |      |       |                |
| 497-32-5    | Bicyclo[2.2.1]heptane, 2,2-dimethyl-5-methylene-             | Not Quantified                    |             |                       |          |                     |                         |      |       |                |
| 50-00-0     | Formaldehyde                                                 | 0.8 mg/L                          | Yes         | Yes                   | Yes      | Yes                 | Yes                     | Yes  | Yes   | Yes            |
| 5004-45-5   | 4-Phenylphthalazin-1(2H)-one                                 | Not Quantified                    |             |                       |          |                     |                         |      |       |                |
| 50-24-8     | Prednisolone                                                 | 0.00051 mg/L                      |             |                       | Yes      |                     |                         |      |       | Yes            |
| 50-32-8     | Benzo(a)pyrene                                               | 0.035 mg/L                        |             |                       | Yes      | Yes                 | Yes                     | Yes  | Yes   | Yes            |
| 503-74-2    | Isovaleric acid                                              | 0.96 mg/L                         |             |                       | Yes      |                     |                         |      |       |                |
| 50617-19-1  | 2,5,8-Triphenyl benzotriazole                                | Not Quantified                    |             |                       |          |                     |                         |      |       |                |
| 506-43-4    | (Z,Z)-9,12-Octadecadien-1-ol                                 | Not Quantified                    |             |                       |          |                     |                         |      |       |                |

SI Table 4c: 1198 chemicals reported as being detected in produced water, summary data

| CAS #      | Name                                                      | Concentration data (Max Reported) | Units | FracFocus (2013-2017) | ToxvalDB | ToxVal (Restricted) | Priority Pollutant List | RCRA | NPDWS | Method exists? |
|------------|-----------------------------------------------------------|-----------------------------------|-------|-----------------------|----------|---------------------|-------------------------|------|-------|----------------|
| 50876-32-9 | CYCLOHEXANE, 1,1,3,5-TETRAMETHYL-, CIS-                   | Not Quantified                    |       |                       |          |                     |                         |      |       |                |
| 50991-08-7 | 1,1'-Bicyclohexyl, 2-methyl-, cis-                        | Not Quantified                    |       |                       |          |                     |                         |      |       |                |
| 50991-09-8 | 1,1'-Bicyclohexyl, 2-methyl-, trans-                      | Not Quantified                    |       |                       |          |                     |                         |      |       |                |
| 50991-12-3 | 1,1'-Bicyclohexyl, 2-ethyl-, cis-                         | Not Quantified                    |       |                       |          |                     |                         |      |       |                |
| 50991-13-4 | 1,1'-Bicyclohexyl, 2-ethyl-, trans-                       | Not Quantified                    |       |                       |          |                     |                         |      |       |                |
| 51050-50-1 | 2-Methyl-7-octadecene                                     | Not Quantified                    |       |                       |          |                     |                         |      |       |                |
| 513-35-9   | 2-Methyl-2-butene                                         | Not Quantified                    |       |                       | Yes      |                     |                         |      |       |                |
| 526-73-8   | 1,2,3-Trimethylbenzene                                    | Not Quantified                    |       | Yes                   | Yes      | Yes                 |                         |      |       | Yes            |
| 527-54-8   | 3,4,5-Trimethylphenol                                     | Not Quantified                    |       |                       |          |                     |                         |      |       |                |
| 52845-07-5 | Isoeicosane                                               | 0.00258                           | mg/L  |                       |          |                     |                         |      |       |                |
| 52856-01-6 | 2-Ethoxy-4,4,5,5-tetramethyloxazoline                     | Not Quantified                    |       |                       |          |                     |                         |      |       |                |
| 52873-50-4 | 1,3-Dimethyl-5-n-hexyladamantane                          | Not Quantified                    |       |                       |          |                     |                         |      |       |                |
| 52896-87-4 | Heptane, 4-(1-methylethyl)-                               | Not Quantified                    |       |                       |          |                     |                         |      |       |                |
| 52914-66-6 | Cyclopentadecanone, 2-methyl-                             | Not Quantified                    |       |                       |          |                     |                         |      |       |                |
| 529-34-0   | 1,2,3,4-Tetrahydronaphthalen-1-one                        | Not Quantified                    |       |                       | Yes      |                     |                         |      |       |                |
| 53172-84-2 | (1-Methyl-1-buten-1-yl)benzene                            | Not Quantified                    |       |                       |          |                     |                         |      |       |                |
| 533-18-6   | Acetic acid, 2-methylphenyl ester                         | 0.05556549                        | mg/L  |                       | Yes      |                     |                         |      |       |                |
| 53366-55-5 | Pentylidenecyclopentane                                   | Not Quantified                    |       |                       |          |                     |                         |      |       |                |
| 5337-61-1  | 2-Octadecyl-1,3-propanediol                               | 0.00042                           | mg/L  |                       |          |                     |                         |      |       |                |
| 53485-49-7 | Tricyclo[6.4.0.0(2,7)]dodecane                            | Not Quantified                    |       |                       |          |                     |                         |      |       |                |
| 53535-33-4 | Heptanol                                                  | Not Quantified                    |       |                       |          |                     |                         |      |       |                |
| 535-77-3   | m-Cymene                                                  | Not Quantified                    |       |                       | Yes      |                     |                         |      |       |                |
| 53-70-3    | Dibenz(a,h)anthracene                                     | 0.023                             | mg/L  |                       | Yes      | Yes                 | Yes                     | Yes  |       | Yes            |
| 53715-09-6 | Chloro(iodo)acetic acid                                   | Not Quantified                    |       |                       |          |                     |                         |      |       |                |
| 5380-87-0  | Furfuryl glycidyl ether                                   | Not Quantified                    |       |                       |          |                     |                         |      |       |                |
| 538-68-1   | Pentylbenzene                                             | Not Quantified                    |       |                       | Yes      |                     |                         |      |       |                |
| 538-86-3   | Benzyl methyl ether                                       | Not Quantified                    |       |                       | Yes      |                     |                         |      |       |                |
| 53907-60-1 | Cyclopentane, 1,1,3,4-tetramethyl-, cis-                  | Not Quantified                    |       |                       |          |                     |                         |      |       |                |
| 5402-53-9  | Chloromethyl propanoate                                   | Not Quantified                    |       |                       |          |                     |                         |      |       |                |
| 54105-66-7 | Undecylcyclohexane                                        | Not Quantified                    |       |                       |          |                     |                         |      |       |                |
| 54105-77-0 | (2-methylbutyl)cyclohexane                                | Not Quantified                    |       |                       |          |                     |                         |      |       |                |
| 54163-69-8 | Isopilocarpine                                            | Not Quantified                    |       |                       |          |                     |                         |      |       |                |
| 541-73-1   | 1,3-Dichlorobenzene                                       | 0.0003                            | mg/L  |                       | Yes      | Yes                 | Yes                     | Yes  |       | Yes            |
| 541-91-3   | 3-Methylcyclopentadecan-1-one                             | Not Quantified                    |       |                       | Yes      |                     |                         |      |       |                |
| 542-28-9   | Tetrahydro-2H-pyran-2-one                                 | Not Quantified                    |       |                       | Yes      |                     |                         |      |       |                |
| 54290-12-9 | 7-heptadecene                                             | Not Quantified                    |       |                       |          |                     |                         |      |       |                |
| 54410-74-1 | 1-Methyl-2-(1-ethylpropyl)benzene                         | Not Quantified                    |       |                       |          |                     |                         |      |       |                |
| 54410-98-9 | 1-nonene, 4,6,8-trimethyl-                                | Not Quantified                    |       |                       |          |                     |                         |      |       |                |
| 54411-00-6 | cyclohexane, 1-methyl-4-(1-methylbutyl)-                  | Not Quantified                    |       |                       |          |                     |                         |      |       |                |
| 54411-01-7 | 1-Methyl-2-pentylcyclohexane                              | Not Quantified                    |       |                       |          |                     |                         |      |       |                |
| 54411-17-5 | Cyclohexane, 1,4-dimethyl-2-(2-methylpropyl)-, (1à,2à,4à) | Not Quantified                    |       |                       |          |                     |                         |      |       |                |
| 544-25-2   | 1,3,5-Cycloheptatriene                                    | Not Quantified                    |       |                       | Yes      |                     |                         |      |       |                |
| 544-63-8   | Tetradecanoic acid                                        | 0.005315497                       | mg/L  |                       | Yes      |                     |                         |      |       |                |
| 544-76-3   | Hexadecane                                                | 0.601                             | mg/L  | Yes                   | Yes      |                     |                         |      |       | Yes            |
| 544-85-4   | Dotriacontane                                             | Not Quantified                    |       |                       |          |                     |                         |      |       |                |
| 5466-77-3  | Octinoxate                                                | 0.00278                           | mg/L  |                       | Yes      |                     |                         |      |       |                |
| 54676-39-0 | 2-BUTYL-1,1,3-TRIMETHYL-CYCLOHEXANE                       | Not Quantified                    |       |                       |          |                     |                         |      |       |                |
| 54699-35-3 | 1,2,4-Benzenetricarboxylic acid, 1,2-dimethyl ester       | Not Quantified                    |       |                       |          |                     |                         |      |       |                |
| 54766-91-5 | Bicyclo[10.1.0]tridec-1-ene                               | Not Quantified                    |       |                       |          |                     |                         |      |       |                |
| 54823-95-9 | Cyclohexane, 1-(cyclohexylmethyl)-3-methyl-, trans-       | Not Quantified                    |       |                       |          |                     |                         |      |       |                |
| 54823-97-1 | cis-1-(Cyclohexylmethyl)-4-methylcyclohexane              | Not Quantified                    |       |                       |          |                     |                         |      |       |                |
| 54823-98-2 | Cyclohexane, 1-(cyclohexylmethyl)-4-methyl-, trans-       | Not Quantified                    |       |                       |          |                     |                         |      |       |                |
| 54827-17-7 | 3,3',5,5'-Tetramethylbenzidine                            | Not Quantified                    |       |                       | Yes      |                     |                         |      |       |                |
| 54832-83-6 | 1H-Indene, octahydro-2,2,4,4,7,7-hexamethyl-, trans-      | Not Quantified                    |       |                       |          |                     |                         |      |       |                |
| 54833-23-7 | 10-Methylcosane                                           | Not Quantified                    |       |                       |          |                     |                         |      |       |                |

SI Table 4c: 1198 chemicals reported as being detected in produced water, summary data

| CAS #      | Name                                                     | Concentration data (Max Reported) | Units | FracFocus (2013-2017) | ToxvalDB | ToxVal (Restricted) | Priority Pollutant List | RCRA | NPDWS | Method exists? |
|------------|----------------------------------------------------------|-----------------------------------|-------|-----------------------|----------|---------------------|-------------------------|------|-------|----------------|
| 54833-48-6 | Heptadecane, 2,6,10,15-tetramethyl                       | Not Quantified                    |       |                       |          |                     |                         |      |       |                |
| 54965-05-8 | Cyclohexane, 1,1,3-trimethyl-2-(3-methylpentyl)-         | Not Quantified                    |       |                       |          |                     |                         |      |       |                |
| 55030-62-1 | Tridecane, 4,8-dimethyl-                                 | Not Quantified                    |       |                       |          |                     |                         |      |       |                |
| 55044-33-2 | 1h-indene, 2-butyl-5-hexyloctahydro-                     | Not Quantified                    |       |                       |          |                     |                         |      |       |                |
| 55045-07-3 | 2-Methyl-8-propyldodecane                                | 0.00052                           | mg/L  |                       |          |                     |                         |      |       |                |
| 55170-90-6 | Bicyclo[2.2.1]heptane, 2-(1-buten-3-yl)-                 | Not Quantified                    |       |                       |          |                     |                         |      |       |                |
| 55282-11-6 | 11-Pentan-3-ylhenicosane                                 | Not Quantified                    |       |                       |          |                     |                         |      |       |                |
| 55282-34-3 | Cyclohexane, 1,3,5-trimethyl-2-octadecyl-                | Not Quantified                    |       |                       |          |                     |                         |      |       |                |
| 55282-68-3 | 2-Dodecyl- 1,1':3',1"-tercyclopentane                    | Not Quantified                    |       |                       |          |                     |                         |      |       |                |
| 55402-13-6 | 2,2,7-Trimethyl-3-octyne                                 | Not Quantified                    |       |                       |          |                     |                         |      |       |                |
| 554-59-6   | Carane                                                   | Not Quantified                    |       |                       |          |                     |                         |      |       |                |
| 5557-93-7  | Benzene, 1-(1-methylethenyl)-2-(1-methylethyl)-          | Not Quantified                    |       |                       |          |                     |                         |      |       |                |
| 556-67-2   | Octamethylcyclotetrasiloxane                             | Not Quantified                    |       | Yes                   | Yes      |                     |                         |      |       | Yes            |
| 55669-88-0 | 1-Isobutyl-2,5-dimethylbenzene                           | Not Quantified                    |       |                       |          |                     |                         |      |       |                |
| 55682-81-0 | 3-tert-Butyl-1,2-dihydronaphthalene                      | Not Quantified                    |       |                       |          |                     |                         |      |       |                |
| 557-35-7   | octane, 2-bromo-                                         | Not Quantified                    |       |                       |          |                     |                         |      |       |                |
| 5579-66-8  | 3,6,9,12,15,18,21,24,27-Nonaoxanonacosane-1,29-diol      | Not Quantified                    |       |                       |          |                     |                         |      |       |                |
| 55821-04-0 | syn-1,6:8,13-Bismethano[14]annulene                      | Not Quantified                    |       |                       |          |                     |                         |      |       |                |
| 56009-20-2 | 1-(1,5-Dimethylhexyl)-4-(4-methylpentyl)cyclohexane      | Not Quantified                    |       |                       |          |                     |                         |      |       |                |
| 5618-62-2  | O-Isobutylhydroxylamine                                  | Not Quantified                    |       |                       |          |                     |                         |      |       |                |
| 56221-91-1 | 13-Tetradecen-1-yl acetate                               | Not Quantified                    |       |                       |          |                     |                         |      |       |                |
| 562-28-7   | (-)-Kaur-16-ene                                          | 0.00136                           | mg/L  |                       | Yes      |                     |                         |      |       |                |
| 56292-65-0 | 2,5-Dimethyldodecane                                     | Not Quantified                    |       |                       |          |                     |                         |      |       |                |
| 56292-69-4 | Tetradecane, 2,5-dimethyl-                               | Not Quantified                    |       |                       |          |                     |                         |      |       |                |
| 563-16-6   | 3,3-Dimethylhexane                                       | Not Quantified                    |       |                       | Yes      |                     |                         |      |       |                |
| 56325-56-5 | Cyclodecene, 3-bromo-                                    | Not Quantified                    |       |                       |          |                     |                         |      |       |                |
| 563-46-2   | 2-Methylbut-1-ene                                        | Not Quantified                    |       |                       | Yes      |                     |                         |      |       |                |
| 56442-17-2 | 4-(4-Fluorobenzoyloxy)benzaldehyde                       | Not Quantified                    |       |                       |          |                     |                         |      |       |                |
| 56-55-3    | Benz(a)anthracene                                        | 0.017                             | mg/L  |                       | Yes      | Yes                 | Yes                     | Yes  |       | Yes            |
| 565-67-3   | 3-Pentanol, 2-methyl-                                    | Not Quantified                    |       |                       |          |                     |                         |      |       |                |
| 5661-80-3  | Bicyclo[5.3.0]decane                                     | Not Quantified                    |       |                       |          |                     |                         |      |       |                |
| 56936-67-5 | Glycine, N-trifluoroacetyl-, isopropyl ester             | Not Quantified                    |       |                       |          |                     |                         |      |       |                |
| 57-10-3    | Hexadecanoic acid                                        | 0.003021193                       | mg/L  |                       | Yes      |                     |                         |      |       |                |
| 57-11-4    | Octadecanoic acid                                        | 0.00373392                        | mg/L  |                       | Yes      |                     |                         |      |       |                |
| 57-12-5    | Cyanide                                                  | 3                                 | mg/L  |                       | Yes      | Yes                 | Yes                     |      | Yes   | Yes            |
| 571-58-4   | 1,4-Dimethylnaphthalene                                  | Not Quantified                    |       |                       | Yes      |                     |                         |      |       |                |
| 571-61-9   | 1,5-Dimethylnaphthalene                                  | Not Quantified                    |       |                       | Yes      |                     |                         |      |       |                |
| 5743-97-5  | phenanthrene, tetradecahydro-                            | Not Quantified                    |       |                       |          |                     |                         |      |       |                |
| 575-43-9   | 1,6-Dimethylnaphthalene                                  | Not Quantified                    |       |                       | Yes      |                     |                         |      |       | Yes            |
| 57-55-6    | 1,2-Propylene glycol                                     | 110                               | mg/L  | Yes                   | Yes      | Yes                 |                         |      |       | Yes            |
| 57-60-3    | Pyruvate                                                 | Not Quantified                    |       |                       | Yes      |                     |                         |      |       |                |
| 57-88-5    | Cholesterol                                              | 0.00026                           | mg/L  |                       | Yes      |                     |                         |      |       | Yes            |
| 57-97-6    | 7,12-Dimethylbenz(a)anthracene                           | Not Quantified                    |       |                       | Yes      | Yes                 |                         | Yes  |       | Yes            |
| 58-08-2    | Caffeine                                                 | 0.0005                            | mg/L  |                       | Yes      |                     |                         |      |       | Yes            |
| 581-40-8   | 2,3-Dimethylnaphthalene                                  | Not Quantified                    |       |                       | Yes      |                     |                         |      |       |                |
| 581-42-0   | 2,6-Dimethylnaphthalene                                  | Not Quantified                    |       |                       | Yes      |                     |                         |      |       | Yes            |
| 58175-57-8 | 1-Pentanol, 2-propyl-                                    | Not Quantified                    |       |                       |          |                     |                         |      |       |                |
| 582-16-1   | 2,7-Dimethylnaphthalene                                  | Not Quantified                    |       |                       |          |                     |                         |      |       |                |
| 584-02-1   | 3-Pentanol                                               | Not Quantified                    |       |                       | Yes      |                     |                         |      |       |                |
| 58422-90-5 | 1,3-Dioxolane-2-heptanenitrile, ð-methyl-ð-oxo-2-phenyl- | Not Quantified                    |       |                       |          |                     |                         |      |       |                |
| 5842-53-5  | 2,2,4-Trimethylpent-3-en-1-ol                            | Not Quantified                    |       |                       |          |                     |                         |      |       |                |
| 58462-32-1 | trans, trans-3-Ethylbicyclo[4.4.0]decane                 | Not Quantified                    |       |                       |          |                     |                         |      |       |                |
| 588-16-9   | 3-Methoxyacetanilide                                     | Not Quantified                    |       |                       |          |                     |                         |      |       |                |
| 58-89-9    | Lindane                                                  | Not Quantified                    |       |                       | Yes      | Yes                 | Yes                     | Yes  | Yes   | Yes            |
| 589-43-5   | 2,4-Dimethylhexane                                       | Not Quantified                    |       |                       | Yes      |                     |                         |      |       |                |

SI Table 4c: 1198 chemicals reported as being detected in produced water, summary data

| CAS #      | Name                                                          | Concentration data (Max Reported) | Units | FracFocus (2013-2017) | ToxvalDB | ToxVal (Restricted) | Priority Pollutant List | RCRA | NPDWS | Method exists? |
|------------|---------------------------------------------------------------|-----------------------------------|-------|-----------------------|----------|---------------------|-------------------------|------|-------|----------------|
| 589-53-7   | 4-Methylheptane                                               | Not Quantified                    |       |                       | Yes      |                     |                         |      |       |                |
| 589-90-2   | 1,4-Dimethylcyclohexane                                       | Not Quantified                    |       |                       | Yes      |                     |                         |      |       |                |
| 589-98-0   | 3-octanol                                                     | Not Quantified                    |       |                       | Yes      |                     |                         |      |       |                |
| 590-66-9   | 1,1-Dimethylcyclohexane                                       | Not Quantified                    |       |                       | Yes      |                     |                         |      |       |                |
| 591-11-7   | 2(5H)-Furanone, 5-methyl-                                     | Not Quantified                    |       |                       |          |                     |                         |      |       |                |
| 591-21-9   | 1,3-Dimethylcyclohexane                                       | Not Quantified                    |       |                       | Yes      |                     |                         |      |       |                |
| 591-48-0   | 3-Methylcyclohexene                                           | Not Quantified                    |       |                       |          |                     |                         |      |       |                |
| 591-78-6   | 2-Hexanone                                                    | 1.07                              | mg/L  |                       | Yes      | Yes                 |                         |      |       | Yes            |
| 592-27-8   | 2-Methylheptane                                               | Not Quantified                    |       |                       | Yes      |                     |                         |      |       |                |
| 59303-13-8 | 2-Methyl-5-propionylthiophene                                 | Not Quantified                    |       |                       |          |                     |                         |      |       |                |
| 593-45-3   | Octadecane                                                    | 0.28                              | mg/L  |                       | Yes      |                     |                         |      |       | Yes            |
| 593-49-7   | Heptacosane                                                   | 0.00095                           | mg/L  |                       |          |                     |                         |      |       |                |
| 594-61-6   | 2-Hydroxyisobutyric acid                                      | Not Quantified                    |       |                       | Yes      |                     |                         |      |       |                |
| 59473-04-0 | Tox                                                           | 3.88                              | mg/L  |                       |          |                     |                         |      |       |                |
| 594-91-2   | Perfluoro-2-methylbutane                                      | Not Quantified                    |       |                       |          |                     |                         |      |       |                |
| 597-49-9   | 3-Pentanol, 3-ethyl-                                          | Not Quantified                    |       |                       |          |                     |                         |      |       |                |
| 598-89-0   | Diiodoacetic acid                                             | Not Quantified                    |       |                       |          |                     |                         |      |       |                |
| 599-64-4   | 4-Cumylphenol                                                 | 0.00118                           | mg/L  |                       | Yes      |                     |                         |      |       | Yes            |
| 6006-33-3  | Cyclohexane, tridecyl-                                        | Not Quantified                    |       |                       |          |                     |                         |      |       |                |
| 60186-80-3 | 5-Tridecyne                                                   | Not Quantified                    |       |                       |          |                     |                         |      |       |                |
| 60212-33-1 | 4-Tetradecyne                                                 | Not Quantified                    |       |                       |          |                     |                         |      |       |                |
| 60274-60-4 | Pentane, 1-chloro-5-iodo-                                     | Not Quantified                    |       |                       |          |                     |                         |      |       |                |
| 6032-29-7  | Pentan-2-ol                                                   | 0.0087                            | mg/L  |                       | Yes      |                     |                         |      |       |                |
| 6044-71-9  | Dodecane, 6-methyl-                                           | Not Quantified                    |       |                       |          |                     |                         |      |       |                |
| 605-39-0   | 1,1'-Biphenyl, 2,2'-dimethyl-                                 | Not Quantified                    |       |                       |          |                     |                         |      |       |                |
| 60-57-1    | Dieldrin                                                      | Not Quantified                    |       |                       | Yes      | Yes                 | Yes                     | Yes  |       | Yes            |
| 6069-98-3  | Cyclohexane, 1-methyl-4-(1-methylethyl)-, cis-                | Not Quantified                    |       |                       |          |                     |                         |      |       |                |
| 610-48-0   | 1-Methylantracene                                             | 0.00048                           | mg/L  |                       |          |                     |                         |      |       |                |
| 611-14-3   | 1-Ethyl-2-methylbenzene                                       | 0.0061                            | mg/L  |                       | Yes      |                     |                         |      |       | Yes            |
| 61141-72-8 | 4,6-Dimethyldodecane                                          | Not Quantified                    |       |                       |          |                     |                         |      |       |                |
| 61141-80-8 | Cyclohexane, 1,2-diethyl-3-methyl-                            | Not Quantified                    |       |                       |          |                     |                         |      |       |                |
| 61142-19-6 | (1,3-Dimethylbutyl)cyclohexane                                | Not Quantified                    |       |                       |          |                     |                         |      |       |                |
| 61142-24-3 | cyclohexane, 1,2,4,5-tetraethyl-, (1.alpha.,2.alpha.,4.alpha. | Not Quantified                    |       |                       |          |                     |                         |      |       |                |
| 61142-32-3 | Cyclopentene, 1,3-dimethyl-2-(1-methylethyl)-                 | Not Quantified                    |       |                       |          |                     |                         |      |       |                |
| 61142-38-9 | Cyclohexane, (3-methylpentyl)-                                | Not Quantified                    |       |                       |          |                     |                         |      |       |                |
| 61142-52-7 | 1-Butyl-2-pentylcyclopentane                                  | Not Quantified                    |       |                       |          |                     |                         |      |       |                |
| 61142-66-3 | cyclopentene, 5-hexyl-3,3-dimethyl-                           | Not Quantified                    |       |                       |          |                     |                         |      |       |                |
| 61142-68-5 | 1-Hexyl-3-methylcyclopentane                                  | Not Quantified                    |       |                       |          |                     |                         |      |       |                |
| 61142-70-9 | 2,4-Diethyl-1-methylcyclohexane                               | Not Quantified                    |       |                       |          |                     |                         |      |       |                |
| 61177-16-0 | Bicyclo[2.2.1]heptane, 2-butyl-                               | Not Quantified                    |       |                       |          |                     |                         |      |       |                |
| 6117-97-1  | 4-Methyldodecane                                              | 0.0101                            | mg/L  |                       |          |                     |                         |      |       |                |
| 61208-94-4 | Cyclohexane, (1-methylbutyl)-                                 | Not Quantified                    |       |                       |          |                     |                         |      |       |                |
| 61233-71-4 | 1,6,9-tetradecatriene                                         | Not Quantified                    |       |                       |          |                     |                         |      |       |                |
| 613-33-2   | 4,4'-Dimethylbiphenyl                                         | Not Quantified                    |       |                       |          |                     |                         |      |       |                |
| 61413-70-5 | Chloromethyl octanoate                                        | Not Quantified                    |       |                       |          |                     |                         |      |       |                |
| 615-22-5   | 2-(Methylthio)benzothiazole                                   | 0.00054                           | mg/L  |                       |          |                     |                         |      |       | Yes            |
| 615-43-0   | o-Iodoaniline                                                 | Not Quantified                    |       |                       |          |                     |                         |      |       |                |
| 6165-40-8  | 7-Methylpentadecane                                           | Not Quantified                    |       |                       | Yes      |                     |                         |      |       |                |
| 6165-44-2  | Cyclohexane, 1,1'-(1,4-butanediyl)bis-                        | Not Quantified                    |       |                       |          |                     |                         |      |       |                |
| 61819-81-6 | 2,3',5'-Trimethyldiphenylmethane                              | 0.00005                           | mg/L  |                       |          |                     |                         |      |       |                |
| 61886-62-2 | 3-Hexadecyne                                                  | Not Quantified                    |       |                       |          |                     |                         |      |       |                |
| 61985-25-9 | 4-Acetylimidazole                                             | Not Quantified                    |       |                       |          |                     |                         |      |       |                |
| 619-99-8   | 3-Ethylhexane                                                 | Not Quantified                    |       |                       | Yes      |                     |                         |      |       |                |
| 620-14-4   | 3-Ethyltoluene                                                | Not Quantified                    |       |                       | Yes      |                     |                         |      |       |                |
| 62016-19-7 | octane, 6-ethyl-2-methyl-                                     | Not Quantified                    |       |                       | Yes      |                     |                         |      |       |                |

SI Table 4c: 1198 chemicals reported as being detected in produced water, summary data

| CAS #      | Name                                                 | Concentration data<br>(Max Reported) | Units | FracFocus<br>(2013-2017) | ToxvalDB | ToxVal<br>(Restricted) | Priority Pollutant<br>List | RCRA | NPDWS | Method exists? |
|------------|------------------------------------------------------|--------------------------------------|-------|--------------------------|----------|------------------------|----------------------------|------|-------|----------------|
| 62016-28-8 | 2,2,6-Trimethyloctane                                | Not Quantified                       |       |                          | Yes      |                        |                            |      |       |                |
| 62016-37-9 | 2,4,6-Trimethyloctane                                | Not Quantified                       |       |                          | Yes      |                        |                            |      |       |                |
| 62016-79-9 | 1-Chloroheptacosane                                  | Not Quantified                       |       |                          |          |                        |                            |      |       |                |
| 62108-21-8 | Decane, 6-ethyl-2-methyl-                            | Not Quantified                       |       |                          |          |                        |                            |      |       |                |
| 62108-25-2 | Decane, 2,6,7-trimethyl-                             | Not Quantified                       |       |                          |          |                        |                            |      |       |                |
| 62108-27-4 | decane, 2,4,6-trimethyl-                             | Not Quantified                       |       |                          |          |                        |                            |      |       |                |
| 621-42-1   | 3-Acetamidophenol                                    | Not Quantified                       |       |                          | Yes      |                        |                            |      |       |                |
| 62183-55-5 | 3-Ethyl-2,7-dimethyloctane                           | Not Quantified                       |       |                          |          |                        |                            |      |       |                |
| 62185-55-1 | Nonane, 4-methyl-5-propyl-                           | Not Quantified                       |       |                          |          |                        |                            |      |       |                |
| 62187-13-7 | 3-Octene, 2,2-dimethyl-, (E)-                        | Not Quantified                       |       |                          |          |                        |                            |      |       |                |
| 62199-51-3 | 1-Pentyl-2-propylcyclopentane                        | Not Quantified                       |       |                          |          |                        |                            |      |       |                |
| 62199-52-4 | 1,2-Dibutylcyclopentane                              | Not Quantified                       |       |                          |          |                        |                            |      |       |                |
| 62238-11-3 | 2,3,5-Trimethyl-decane                               | Not Quantified                       |       |                          |          |                        |                            |      |       |                |
| 62238-13-5 | 2,3,7-Trimethyldecane                                | Not Quantified                       |       |                          |          |                        |                            |      |       |                |
| 62238-15-7 | Decane, 2,3,4-trimethyl-                             | Not Quantified                       |       |                          |          |                        |                            |      |       |                |
| 62238-29-3 | cyclohexane, 1-ethyl-1,3-dimethyl-, trans-           | Not Quantified                       |       |                          |          |                        |                            |      |       |                |
| 62238-32-8 | cyclohexane, 1-ethyl-1,4-dimethyl-, trans-           | Not Quantified                       |       |                          |          |                        |                            |      |       |                |
| 62238-33-9 | cyclohexane, 1-ethyl-2-propyl-                       | Not Quantified                       |       |                          | Yes      |                        |                            |      |       |                |
| 623-55-2   | 3-Hexanol, 5-methyl-                                 | Not Quantified                       |       |                          |          |                        |                            |      |       |                |
| 62376-17-4 | 1,2-Dimethyl-3-pentyl-4-propylcyclohexane            | Not Quantified                       |       |                          |          |                        |                            |      |       |                |
| 624-29-3   | Cyclohexane, 1,4-dimethyl-, cis-                     | Not Quantified                       |       |                          |          |                        |                            |      |       |                |
| 6248-88-0  | Bicyclo[2.2.1]heptane, 1,3,3-trimethyl-              | Not Quantified                       |       |                          |          |                        |                            |      |       |                |
| 625-31-0   | 4-Penten-2-ol                                        | Not Quantified                       |       |                          | Yes      |                        |                            |      |       |                |
| 62583-58-8 | 1-Butyl-2-ethyloctahydro-1H-4,7-epoxyinden-5-ol      | 0.0009 mg/L                          |       |                          |          |                        |                            |      |       |                |
| 626-03-9   | 2,4-Dihydroxypyridine                                | Not Quantified                       |       |                          |          |                        |                            |      |       |                |
| 626-98-2   | 2-Pentenoic acid                                     | Not Quantified                       |       |                          |          |                        |                            |      |       |                |
| 629-50-5   | Tridecane                                            | 0.0524 mg/L                          |       | Yes                      | Yes      |                        |                            |      |       |                |
| 629-59-4   | Tetradecane                                          | 0.948 mg/L                           |       | Yes                      | Yes      |                        |                            |      |       | Yes            |
| 62960-77-4 | 4-Octene, 2,6-dimethyl-, [S-(Z)]-                    | Not Quantified                       |       |                          |          |                        |                            |      |       |                |
| 629-62-9   | Pentadecane                                          | Not Quantified                       |       |                          | Yes      |                        |                            |      |       |                |
| 629-72-1   | 1-Bromopentadecane                                   | Not Quantified                       |       |                          |          |                        |                            |      |       |                |
| 629-73-2   | 1-Hexadecene                                         | Not Quantified                       |       | Yes                      | Yes      |                        |                            |      |       |                |
| 629-78-7   | Heptadecane                                          | Not Quantified                       |       |                          | Yes      |                        |                            |      |       |                |
| 629-80-1   | Hexadecanal                                          | 0.165 mg/L                           |       |                          |          |                        |                            |      |       |                |
| 629-89-0   | Octadecyne                                           | Not Quantified                       |       |                          |          |                        |                            |      |       |                |
| 629-92-5   | Nonadecane                                           | Not Quantified                       |       |                          | Yes      |                        |                            |      |       |                |
| 629-94-7   | Heneicosane                                          | Not Quantified                       |       |                          | Yes      |                        |                            |      |       |                |
| 629-97-0   | Docosane                                             | 0.224 mg/L                           |       |                          | Yes      |                        |                            |      |       | Yes            |
| 629-99-2   | Pentacosane                                          | 0.00154 mg/L                         |       |                          |          |                        |                            |      |       |                |
| 630-01-3   | Hexacosane                                           | 0.0651 mg/L                          |       |                          |          |                        |                            |      |       | Yes            |
| 630-02-4   | Octacosane                                           | 0.0387 mg/L                          |       |                          | Yes      |                        |                            |      |       | Yes            |
| 630-03-5   | Nonacosane                                           | Not Quantified                       |       |                          | Yes      |                        |                            |      |       |                |
| 630-06-8   | Hexatriacontane                                      | Not Quantified                       |       |                          |          |                        |                            |      |       |                |
| 630-07-9   | Pentatriacontane                                     | Not Quantified                       |       |                          | Yes      |                        |                            |      |       |                |
| 6305-52-8  | 2-n-Butyldecahydronaphthalene                        | Not Quantified                       |       |                          |          |                        |                            |      |       |                |
| 63088-19-7 | (4R*,5R*,9S*)-5,9-Dimethylspiro[3.5]nonan-1-one      | Not Quantified                       |       |                          |          |                        |                            |      |       |                |
| 63263-09-2 | 1,3-Dimethyladamantan-5-carboxylic acid, ethyl ester | Not Quantified                       |       |                          |          |                        |                            |      |       |                |
| 63449-41-2 | Benzyl-C8-18-alkyldimethylammonium chlorides         | Not Quantified                       |       |                          | Yes      |                        |                            |      |       |                |
| 63521-76-6 | Tridecanedial                                        | 0.00086 mg/L                         |       |                          |          |                        |                            |      |       |                |
| 63798-30-1 | 2-Butynamide, N-methyl-                              | Not Quantified                       |       |                          |          |                        |                            |      |       |                |
| 638-29-9   | Valeryl chloride                                     | Not Quantified                       |       |                          |          |                        |                            |      |       |                |
| 63830-68-2 | 4-Nonene, 2,3,3-trimethyl-, (Z)-                     | Not Quantified                       |       |                          |          |                        |                            |      |       |                |
| 638-36-8   | 2,6,10,14-Tetramethylhexadecane                      | 0.0896 mg/L                          |       |                          |          |                        |                            |      |       |                |
| 638-60-8   | 2-Tetradecene                                        | Not Quantified                       |       |                          |          |                        |                            |      |       |                |
| 638-66-4   | Octadecanal                                          | 0.094 mg/L                           |       |                          |          |                        |                            |      |       |                |

SI Table 4c: 1198 chemicals reported as being detected in produced water, summary data

| CAS #       | Name                                                  | Concentration data (Max Reported) | Units | FracFocus (2013-2017) | ToxvalDB | ToxVal (Restricted) | Priority Pollutant List | RCRA | NPDWS | Method exists? |
|-------------|-------------------------------------------------------|-----------------------------------|-------|-----------------------|----------|---------------------|-------------------------|------|-------|----------------|
| 638-67-5    | Tricosane                                             | 0.0017                            | mg/L  |                       |          |                     |                         |      |       |                |
| 638-68-6    | Triacontane                                           | 0.0131                            | mg/L  |                       |          |                     |                         |      |       | Yes            |
| 64-17-5     | Ethanol                                               | 0.5333                            | mg/L  | Yes                   | Yes      |                     |                         |      |       | Yes            |
| 6418-41-3   | tridecane, 3-methyl-                                  | Not Quantified                    |       |                       | Yes      |                     |                         |      |       |                |
| 6418-44-6   | heptadecane, 3-methyl-                                | Not Quantified                    |       |                       |          |                     |                         |      |       |                |
| 64-18-6     | Formic acid                                           | Not Quantified                    |       | Yes                   | Yes      | Yes                 |                         | Yes  |       |                |
| 64-19-7     | Acetic acid                                           | 1600                              | mg/L  | Yes                   | Yes      |                     |                         |      |       | Yes            |
| 64275-73-6  | (Z)-5-Octen-1-ol                                      | Not Quantified                    |       |                       |          |                     |                         |      |       |                |
| 64341-49-7  | 1-Bromo-3-butene-2-ol                                 | Not Quantified                    |       |                       |          |                     |                         |      |       |                |
| 643-93-6    | 3-Methylbiphenyl                                      | Not Quantified                    |       |                       |          |                     |                         |      |       |                |
| 645-10-3    | 1,7-dimethyl-4-(1-methylethyl)cyclodecane             | Not Quantified                    |       |                       |          |                     |                         |      |       |                |
| 646-07-1    | Pentanoic acid, 4-methyl-                             | 3.456                             | mg/L  |                       | Yes      |                     |                         |      |       |                |
| 646-31-1    | Tetracosane                                           | 0.112                             | mg/L  |                       |          |                     |                         |      |       | Yes            |
| 65119-95-1  | 22-Tricosenoic acid                                   | 0.00043                           | mg/L  |                       |          |                     |                         |      |       |                |
| 65-85-0     | Benzoic acid                                          | 1.03                              | mg/L  | Yes                   | Yes      | Yes                 |                         |      |       | Yes            |
| 65996-50-1  | 1H-Pyrrolo[3,2-d]pyrimidine-2,4(3H,5H)-dione          | Not Quantified                    |       |                       |          |                     |                         |      |       |                |
| 66-25-1     | Hexanal                                               | Not Quantified                    |       |                       | Yes      |                     |                         |      |       | Yes            |
| 66542-51-6  | Chloromethyl hexanoate                                | Not Quantified                    |       |                       |          |                     |                         |      |       |                |
| 66552-62-3  | Naphthalene, decahydro-1,5-dimethyl-                  | Not Quantified                    |       |                       |          |                     |                         |      |       |                |
| 66660-37-5  | Trans, trans-2-ethylbicyclo[4.4.0]decane              | Not Quantified                    |       |                       |          |                     |                         |      |       |                |
| 66660-38-6  | cis, trans-2-Ethylbicyclo[4.4.0]decane                | Not Quantified                    |       |                       |          |                     |                         |      |       |                |
| 66660-42-2  | cis, cis-3-ethylbicyclo[4.4.0]decane                  | Not Quantified                    |       |                       |          |                     |                         |      |       |                |
| 66826-95-7  | 1-(Cyclohexylmethyl)-4-methylcyclohexane              | Not Quantified                    |       |                       |          |                     |                         |      |       |                |
| 6682-71-9   | 4,7-Dimethylindan                                     | Not Quantified                    |       |                       |          |                     |                         |      |       |                |
| 6708-17-4   | Bicyclooctyl                                          | Not Quantified                    |       |                       |          |                     |                         |      |       |                |
| 6750-34-1   | 1-dodecanol, 3,7,11-trimethyl-                        | Not Quantified                    |       |                       |          |                     |                         |      |       |                |
| 67-56-1     | Methanol                                              | 428                               | mg/L  | Yes                   | Yes      | Yes                 |                         |      |       | Yes            |
| 67-63-0     | Isopropanol                                           | 83                                | mg/L  | Yes                   | Yes      | Yes                 |                         |      |       | Yes            |
| 67-64-1     | Acetone                                               | 21.7                              | mg/L  | Yes                   | Yes      | Yes                 |                         |      |       | Yes            |
| 6765-39-5   | 1-Heptadecene                                         | Not Quantified                    |       |                       |          |                     |                         |      |       |                |
| 67-66-3     | Chloroform                                            | Not Quantified                    |       |                       | Yes      | Yes                 | Yes                     | Yes  | Yes   | Yes            |
| 6783-92-2   | cyclohexane, 1,1,2,3-tetramethyl-                     | Not Quantified                    |       |                       |          |                     |                         |      |       |                |
| 68-12-2     | N,N-Dimethylformamide                                 | 519                               | mg/L  | Yes                   | Yes      | Yes                 |                         |      |       | Yes            |
| 68139-30-0  | 1-Propanaminium, N-(3-aminopropyl)-2-hydroxy-N,N-dime | Not Quantified                    |       | Yes                   |          |                     |                         |      |       |                |
| 68140-01-2  | N-[3-(Dimethylamino)propyl] coco amides               | Not Quantified                    |       | Yes                   |          |                     |                         |      |       |                |
| 68213-23-0  | Alcohols, C12-18, ethoxylated                         | 0.3                               | mg/L  |                       |          |                     |                         |      |       |                |
| 68334-30-5  | Fuels, diesel                                         | 1.3                               | mg/L  |                       | Yes      |                     |                         |      |       | Yes            |
| 68593-94-2  | 2-Ethenylphenanthrene                                 | 0.00022                           | mg/L  |                       |          |                     |                         |      |       |                |
| 68603-15-6  | Alcohols, C6-12                                       | Not Quantified                    |       | Yes                   | Yes      |                     |                         |      |       |                |
| 693-13-0    | Diisopropylcarbodiimide                               | Not Quantified                    |       |                       |          |                     |                         |      |       |                |
| 6937-34-4   | 3-iodophthalic acid                                   | Not Quantified                    |       |                       |          |                     |                         |      |       |                |
| 69462-10-8  | 2,2,4-Trimethylpentanenitrile                         | Not Quantified                    |       |                       |          |                     |                         |      |       |                |
| 695-06-7    | gamma-Caprolactone                                    | Not Quantified                    |       |                       | Yes      |                     |                         |      |       |                |
| 69586-09-0  | 2,2-Dichloro-3,6-dimethyl-2H-1,2-oxasiline            | Not Quantified                    |       |                       |          |                     |                         |      |       |                |
| 696-29-7    | Cyclohexane, (1-methylethyl)-                         | Not Quantified                    |       |                       | Yes      |                     |                         |      |       |                |
| 6971-40-0   | 17-pentatriacontene                                   | 0.001                             | mg/L  |                       |          |                     |                         |      |       |                |
| 6971-52-4   | 3-Methoxy-2-methylphenol                              | Not Quantified                    |       |                       |          |                     |                         |      |       |                |
| 6975-98-0   | 2-Methyldecane                                        | Not Quantified                    |       |                       |          |                     |                         |      |       |                |
| 697-82-5    | 2,3,5-Trimethylphenol                                 | Not Quantified                    |       |                       | Yes      |                     |                         |      |       |                |
| 6982-25-8   | DL-2,3-Butanediol                                     | Not Quantified                    |       |                       |          |                     |                         |      |       |                |
| 69855-48-7  | 1-Methyl-4-(methylsulfonyl)bicyclo[2.2.2]octane       | Not Quantified                    |       |                       |          |                     |                         |      |       |                |
| 698-76-0    | delta-Octanolactone                                   | Not Quantified                    |       |                       | Yes      |                     |                         |      |       |                |
| 700000-97-1 | 2,3,3-Trimethyl-1-hexene                              | Not Quantified                    |       |                       |          |                     |                         |      |       |                |
| 700-12-9    | Benzene, pentamethyl-                                 | 0.2588                            | mg/L  |                       | Yes      |                     |                         |      |       | Yes            |
| 702-79-4    | 1,3-Dimethyladamantane                                | 9.8                               | mg/L  |                       |          |                     |                         |      |       |                |

SI Table 4c: 1198 chemicals reported as being detected in produced water, summary data

| CAS #      | Name                                                     | Concentration data<br>(Max Reported) | Units | FracFocus<br>(2013-2017) | ToxvalDB | ToxVal<br>(Restricted) | Priority Pollutant<br>List | RCRA | NPDWS | Method exists? |
|------------|----------------------------------------------------------|--------------------------------------|-------|--------------------------|----------|------------------------|----------------------------|------|-------|----------------|
| 7040-53-1  | Dicyclohexyl methylphosphonate                           | Not Quantified                       |       |                          |          |                        |                            |      |       |                |
| 7045-70-7  | 1,3-Diisopropyl cyclohexane                              | Not Quantified                       |       |                          |          |                        |                            |      |       |                |
| 7045-71-8  | 2-Methylundecane                                         | 0.0703                               | mg/L  |                          |          |                        |                            |      |       |                |
| 705-86-2   | 6-Pentyltetrahydro-2H-pyran-2-one                        | Not Quantified                       |       |                          | Yes      |                        |                            |      |       |                |
| 706-14-9   | gamma-Decanolactone                                      | Not Quantified                       |       |                          | Yes      |                        |                            |      |       |                |
| 707-35-7   | 1,3,5-Trimethyladamantane                                | Not Quantified                       |       |                          |          |                        |                            |      |       |                |
| 7098-21-7  | Tritetracontane                                          | Not Quantified                       |       |                          |          |                        |                            |      |       |                |
| 7098-22-8  | Tetratetracontane                                        | Not Quantified                       |       |                          |          |                        |                            |      |       |                |
| 71060-57-6 | Alcohol ethoxylated*                                     | Not Quantified                       |       | Yes                      | Yes      |                        |                            |      |       |                |
| 71312-54-4 | 1,4-Dimethyl-2,3-diazabicyclo[2.2.1]hept-2-ene           | Not Quantified                       |       |                          |          |                        |                            |      |       |                |
| 71-36-3    | 1-Butanol                                                | 16.5                                 | mg/L  | Yes                      | Yes      | Yes                    |                            |      |       | Yes            |
| 71-43-2    | Benzene                                                  | 860                                  | mg/L  | Yes                      | Yes      | Yes                    | Yes                        | Yes  | Yes   | Yes            |
| 7145-99-5  | 1,3-Benzodioxole, 5-methyl-                              | Not Quantified                       |       |                          |          |                        |                            |      |       |                |
| 71-47-6    | Formic acid, ion(1-)                                     | Not Quantified                       |       |                          |          |                        |                            |      |       |                |
| 71-50-1    | Acetate                                                  | 10037.65                             | mg/L  |                          |          |                        |                            |      |       | Yes            |
| 71-52-3    | Bicarbonate                                              | 13900                                | mg/L  |                          | Yes      |                        |                            |      |       | Yes            |
| 719-22-2   | 2,6-Bis-(1,1-dimethylethyl)-2,5-cyclohexadiene-1,4-dione | 0.00028                              | mg/L  |                          |          |                        |                            |      |       | Yes            |
| 71940-29-9 | 3,4-Dimethyl-2-(3-methyl-butyl)-benzoic acid, methyl est | Not Quantified                       |       |                          |          |                        |                            |      |       |                |
| 72-03-7    | Propanoate                                               | 31.42096                             | mg/L  |                          |          |                        |                            |      |       |                |
| 7206-14-6  | 3-Dodecene, (E)-                                         | Not Quantified                       |       |                          |          |                        |                            |      |       |                |
| 7206-19-1  | 3-Octadecene, (E)-                                       | Not Quantified                       |       |                          |          |                        |                            |      |       |                |
| 7206-25-9  | 9-octadecene, (e)-                                       | Not Quantified                       |       |                          |          |                        |                            |      |       |                |
| 7216-42-4  | Isonicotinaldehyde 1-oxide                               | Not Quantified                       |       |                          |          |                        |                            |      |       |                |
| 72218-58-7 | 3-Methylheptyl acetate                                   | Not Quantified                       |       |                          |          |                        |                            |      |       |                |
| 72-55-9    | p,p'-DDE                                                 | Not Quantified                       |       |                          | Yes      | Yes                    | Yes                        | Yes  |       | Yes            |
| 73105-67-6 | 1-Iodo-2-methylundecane                                  | Not Quantified                       |       |                          |          |                        |                            |      |       |                |
| 7320-37-8  | 1,2-Epoxyhexadecane                                      | Not Quantified                       |       |                          | Yes      |                        |                            |      |       |                |
| 7326-46-7  | 2-Furanol, tetrahydro-2-methyl-                          | Not Quantified                       |       |                          |          |                        |                            |      |       |                |
| 73493-71-7 | 9-Methoxy-9H-fluorene                                    | 0.00018                              | mg/L  |                          |          |                        |                            |      |       |                |
| 7373-13-9  | 2-Octadecanone                                           | 0.215                                | mg/L  |                          |          |                        |                            |      |       |                |
| 74054-92-5 | 1,1,6,6-tetramethylspiro[4.4]nonane                      | Not Quantified                       |       |                          |          |                        |                            |      |       |                |
| 7411-16-7  | 3-Ethyl-1,2,4(1H)-triazole                               | Not Quantified                       |       |                          |          |                        |                            |      |       |                |
| 7421-93-4  | Endrin aldehyde                                          | Not Quantified                       |       |                          | Yes      |                        | Yes                        |      |       | Yes            |
| 7429-90-5  | Aluminum                                                 | 686                                  | mg/L  | Yes                      | Yes      | Yes                    |                            |      |       | Yes            |
| 7429-91-6  | Dysprosium                                               | 0.0004                               | mg/L  |                          | Yes      |                        |                            |      |       |                |
| 74367-34-3 | 3-Hydroxy-2,4,4-trimethylpentyl 2-methylpropanoate       | Not Quantified                       |       |                          |          |                        |                            |      |       |                |
| 7439-89-6  | Iron                                                     | 2838                                 | mg/L  |                          | Yes      | Yes                    |                            |      |       | Yes            |
| 7439-91-0  | Lanthanum                                                | 0.00251                              | mg/L  |                          | Yes      | Yes                    |                            |      |       | Yes            |
| 7439-92-1  | Lead                                                     | 70.2                                 | mg/L  |                          | Yes      | Yes                    | Yes                        | Yes  | Yes   | Yes            |
| 7439-93-2  | Lithium                                                  | 24600                                | mg/L  |                          | Yes      | Yes                    |                            |      |       | Yes            |
| 7439-94-3  | Lutetium                                                 | 0.00045                              | mg/L  |                          | Yes      | Yes                    |                            |      |       |                |
| 7439-95-4  | Magnesium                                                | 13000                                | mg/L  |                          | Yes      |                        |                            |      |       | Yes            |
| 7439-96-5  | Manganese                                                | 931                                  | mg/L  |                          | Yes      | Yes                    |                            |      |       | Yes            |
| 7439-97-6  | Mercury                                                  | 0.0138                               | mg/L  |                          | Yes      | Yes                    | Yes                        | Yes  | Yes   | Yes            |
| 7439-98-7  | Molybdenum                                               | 11                                   | mg/L  |                          | Yes      | Yes                    |                            |      |       | Yes            |
| 7439-99-8  | Neptunium                                                | 1640                                 | pCi/L |                          |          |                        |                            |      |       |                |
| 7440-00-8  | Neodymium                                                | 0.00051                              | mg/L  |                          | Yes      |                        |                            |      |       |                |
| 7440-02-0  | Nickel                                                   | 4.78                                 | mg/L  | Yes                      | Yes      | Yes                    |                            | Yes  |       | Yes            |
| 7440-10-0  | Praseodymium                                             | 0.0004                               | mg/L  |                          | Yes      |                        |                            |      |       |                |
| 7440-14-4  | Radium                                                   | 18045                                | pCi/L |                          | Yes      |                        |                            |      |       | Yes            |
| 7440-17-7  | Rubidium                                                 | 22.3                                 | mg/L  |                          | Yes      | Yes                    |                            |      |       | Yes            |
| 7440-19-9  | Samarium                                                 | 0.0012                               | mg/L  |                          | Yes      |                        |                            |      |       |                |
| 7440-20-2  | Scandium                                                 | 0.003                                | mg/L  |                          | Yes      |                        |                            |      |       | Yes            |
| 7440-21-3  | Silicon                                                  | 160                                  | mg/L  | Yes                      | Yes      |                        |                            |      |       | Yes            |
| 7440-22-4  | Silver                                                   | 2                                    | mg/L  |                          | Yes      | Yes                    | Yes                        | Yes  |       | Yes            |

SI Table 4c: 1198 chemicals reported as being detected in produced water, summary data

| CAS #      | Name                                                       | Concentration data (Max Reported) | Units | FracFocus (2013-2017) | ToxvalDB | ToxVal (Restricted) | Priority Pollutant List | RCRA | NPDWS | Method exists? |
|------------|------------------------------------------------------------|-----------------------------------|-------|-----------------------|----------|---------------------|-------------------------|------|-------|----------------|
| 7440-23-5  | Sodium                                                     | 119000                            | mg/L  | Yes                   | Yes      |                     |                         |      |       | Yes            |
| 7440-24-6  | Strontium                                                  | 36000                             | mg/L  |                       | Yes      | Yes                 |                         |      |       | Yes            |
| 7440-27-9  | Terbium                                                    | 0.0004                            | mg/L  |                       | Yes      |                     |                         |      |       |                |
| 7440-28-0  | Thallium                                                   | 10                                | mg/L  |                       | Yes      | Yes                 | Yes                     | Yes  | Yes   | Yes            |
| 7440-29-1  | Thorium                                                    | 35.9                              | mg/L  |                       | Yes      |                     |                         |      |       | Yes            |
| 7440-30-4  | Thulium                                                    | 0.0004                            | mg/L  |                       | Yes      |                     |                         |      |       |                |
| 7440-31-5  | Tin                                                        | 0.3341                            | mg/L  |                       | Yes      | Yes                 |                         |      |       | Yes            |
| 7440-32-6  | Titanium                                                   | 4.16                              | mg/L  |                       | Yes      |                     |                         |      |       | Yes            |
| 7440-33-7  | Tungsten                                                   | 0.096                             | mg/L  |                       | Yes      | Yes                 |                         |      |       | Yes            |
| 7440-36-0  | Antimony                                                   | 12                                | mg/L  |                       | Yes      | Yes                 | Yes                     | Yes  | Yes   | Yes            |
| 7440-38-2  | Arsenic                                                    | 15                                | mg/L  |                       | Yes      | Yes                 | Yes                     | Yes  | Yes   | Yes            |
| 7440-39-3  | Barium                                                     | 160000                            | mg/L  |                       | Yes      | Yes                 |                         | Yes  | Yes   | Yes            |
| 7440-41-7  | Beryllium                                                  | 18.2                              | mg/L  |                       | Yes      | Yes                 | Yes                     | Yes  | Yes   | Yes            |
| 7440-42-8  | Boron                                                      | 176000                            | mg/L  |                       | Yes      | Yes                 |                         |      |       | Yes            |
| 7440-43-9  | Cadmium                                                    | 0.99                              | mg/L  |                       | Yes      | Yes                 | Yes                     | Yes  | Yes   | Yes            |
| 7440-44-0  | Carbon                                                     | 3750                              | mg/L  | Yes                   | Yes      |                     |                         |      |       | Yes            |
| 7440-45-1  | Cerium                                                     | 0.00041                           | mg/L  |                       | Yes      |                     |                         |      |       | Yes            |
| 7440-46-2  | Cesium                                                     | 537                               | mg/L  |                       | Yes      |                     |                         |      |       | Yes            |
| 7440-47-3  | Chromium                                                   | 83.9                              | mg/L  |                       | Yes      |                     | Yes                     | Yes  | Yes   | Yes            |
| 7440-48-4  | Cobalt                                                     | 8.2                               | mg/L  |                       | Yes      | Yes                 |                         |      |       | Yes            |
| 7440-50-8  | Copper                                                     | 24.2                              | mg/L  |                       | Yes      | Yes                 | Yes                     |      | Yes   | Yes            |
| 7440-52-0  | Erbium                                                     | 0.0004                            | mg/L  |                       | Yes      |                     |                         |      |       |                |
| 7440-53-1  | Europium                                                   | 0.01317                           | mg/L  |                       | Yes      |                     |                         |      |       |                |
| 7440-54-2  | Gadolinium                                                 | 0.00277                           | mg/L  |                       | Yes      | Yes                 |                         |      |       |                |
| 7440-56-4  | Germanium                                                  | 0.44                              | mg/L  |                       | Yes      |                     |                         |      |       | Yes            |
| 7440-57-5  | Gold                                                       | 0.018                             | mg/L  |                       | Yes      |                     |                         |      |       | Yes            |
| 7440-58-6  | Hafnium                                                    | 0.00545                           | mg/L  |                       | Yes      |                     |                         |      |       | Yes            |
| 7440-60-0  | Holmium                                                    | 0.0004                            | mg/L  |                       | Yes      |                     |                         |      |       |                |
| 7440-61-1  | Uranium                                                    | 497                               | pCi/L |                       | Yes      | Yes                 |                         |      | Yes   | Yes            |
| 7440-62-2  | Vanadium                                                   | 4.51                              | mg/L  |                       | Yes      | Yes                 |                         |      |       | Yes            |
| 7440-64-4  | Ytterbium                                                  | 0.00278                           | mg/L  |                       | Yes      |                     |                         |      |       |                |
| 7440-65-5  | Yttrium                                                    | 0.011                             | mg/L  |                       | Yes      |                     |                         |      |       | Yes            |
| 7440-66-6  | Zinc                                                       | 243                               | mg/L  |                       | Yes      | Yes                 | Yes                     |      |       | Yes            |
| 7440-67-7  | Zirconium                                                  | 8.76                              | mg/L  | Yes                   | Yes      | Yes                 |                         |      |       | Yes            |
| 7440-69-9  | Bismuth                                                    | 0.424                             | mg/L  |                       | Yes      |                     |                         |      |       | Yes            |
| 7440-70-2  | Calcium                                                    | 180000                            | mg/L  |                       | Yes      |                     |                         |      |       | Yes            |
| 74421-09-3 | cyclopentane, 1,1,3-trimethyl-3-(2-methyl-2-propenyl)-     | Not Quantified                    |       |                       |          |                     |                         |      |       |                |
| 74630-16-3 | Phosphonous dichloride, (1,7,7-trimethylbicyclo[2.2.1]hept | Not Quantified                    |       |                       |          |                     |                         |      |       |                |
| 74646-31-4 | 14-Bromo-1-tetradecene                                     | Not Quantified                    |       |                       |          |                     |                         |      |       |                |
| 74646-37-0 | 1-Tridecyn-4-ol                                            | Not Quantified                    |       |                       |          |                     |                         |      |       |                |
| 74646-38-1 | 4,4-Dimethyltetracyclo[5.2.1.02.6.03,5]decane              | 0.00027                           | mg/L  |                       |          |                     |                         |      |       |                |
| 74663-66-4 | Cyclohexane, 1,5-diethyl-2,3-dimethyl-                     | Not Quantified                    |       |                       |          |                     |                         |      |       |                |
| 74663-71-1 | cyclohexane, 1,1'-(1,2-dimethyl-1,2-ethanediyl)bis-        | Not Quantified                    |       |                       |          |                     |                         |      |       |                |
| 74685-30-6 | 5-eicosene, (e)-                                           | Not Quantified                    |       |                       |          |                     |                         |      |       |                |
| 74685-33-9 | 3-eicosene, (e)-                                           | Not Quantified                    |       |                       |          |                     |                         |      |       |                |
| 74810-41-6 | cyclohexane, (2-ethyl-1-methylbutylidene)-                 | Not Quantified                    |       |                       |          |                     |                         |      |       |                |
| 74810-42-7 | cyclohexane, (2-ethyl-1-methyl-1-butenyl)-                 | Not Quantified                    |       |                       |          |                     |                         |      |       |                |
| 74-82-8    | Methane                                                    | 3420.48                           | mg/L  |                       | Yes      |                     |                         |      |       | Yes            |
| 74-83-9    | Methyl bromide                                             | Not Quantified                    |       |                       | Yes      | Yes                 | Yes                     | Yes  |       | Yes            |
| 74-84-0    | Ethane                                                     | 571.19                            | mg/L  | Yes                   | Yes      |                     |                         |      |       |                |
| 74-87-3    | Chloromethane                                              | 0.0054                            | mg/L  | Yes                   | Yes      | Yes                 | Yes                     | Yes  |       | Yes            |
| 74-98-6    | Propane                                                    | 86.92                             | mg/L  | Yes                   | Yes      |                     |                         |      |       |                |
| 75-07-0    | Acetaldehyde                                               | 0.1                               | mg/L  | Yes                   | Yes      | Yes                 |                         |      |       | Yes            |
| 75-09-2    | Dichloromethane                                            | 0.51                              | mg/L  | Yes                   | Yes      | Yes                 | Yes                     | Yes  | Yes   | Yes            |
| 75-15-0    | Carbon disulfide                                           | Not Quantified                    |       |                       | Yes      | Yes                 |                         | Yes  |       | Yes            |



SI Table 4c: 1198 chemicals reported as being detected in produced water, summary data

| CAS #      | Name                                                      | Concentration data<br>(Max Reported) | Units | FracFocus<br>(2013-2017) | ToxvalDB | ToxVal<br>(Restricted) | Priority Pollutant<br>List | RCRA | NPDWS | Method exists? |
|------------|-----------------------------------------------------------|--------------------------------------|-------|--------------------------|----------|------------------------|----------------------------|------|-------|----------------|
| 75163-97-2 | octadecane, 2,6-dimethyl-                                 | 0.2917                               | mg/L  |                          |          |                        |                            |      |       |                |
| 7524-63-2  | 2,6-DIMETHYLTETRALINE                                     | Not Quantified                       |       |                          |          |                        |                            |      |       |                |
| 75-25-2    | Bromoform                                                 | Not Quantified                       |       |                          | Yes      | Yes                    | Yes                        | Yes  | Yes   | Yes            |
| 75-27-4    | Bromodichloromethane                                      | Not Quantified                       |       |                          | Yes      | Yes                    | Yes                        |      | Yes   | Yes            |
| 75-34-3    | 1,1-Dichloroethane                                        | 0.005                                | mg/L  |                          | Yes      | Yes                    | Yes                        | Yes  |       | Yes            |
| 754-43-8   | 2-Bromo-1,1,1,3,3,3-hexafluoro-2-(trifluoromethyl)propane | Not Quantified                       |       |                          |          |                        |                            |      |       |                |
| 7553-56-2  | Iodine                                                    | 385                                  | mg/L  |                          | Yes      | Yes                    |                            |      |       | Yes            |
| 75-65-0    | tert-Butyl alcohol                                        | 0.071                                | mg/L  |                          | Yes      |                        |                            |      |       | Yes            |
| 75-83-2    | 2,2-Dimethylbutane                                        | 0.00066                              | mg/L  |                          | Yes      |                        |                            |      |       |                |
| 762-42-5   | 2-Butynedioic acid, dimethyl ester                        | Not Quantified                       |       |                          |          |                        |                            |      |       |                |
| 7631-86-9  | Silica                                                    | 225                                  | mg/L  | Yes                      | Yes      |                        |                            |      |       | Yes            |
| 76-44-8    | Heptachlor                                                | Not Quantified                       |       |                          | Yes      | Yes                    | Yes                        | Yes  | Yes   | Yes            |
| 764-96-5   | (5Z)-5-Undecene                                           | Not Quantified                       |       |                          |          |                        |                            |      |       |                |
| 7664-41-7  | Ammonia                                                   | 1970                                 | mg/L  | Yes                      | Yes      | Yes                    |                            |      |       | Yes            |
| 766-76-7   | Benzoate                                                  | 0.3512364                            | mg/L  |                          |          |                        |                            |      |       |                |
| 767-58-8   | Indan, 1-methyl-                                          | Not Quantified                       |       |                          |          |                        |                            |      |       |                |
| 7683-64-9  | Squalene                                                  | 0.00024                              | mg/L  |                          |          |                        |                            |      |       | Yes            |
| 7704-34-9  | Sulfur                                                    | 112                                  | mg/L  | Yes                      | Yes      |                        |                            |      |       | Yes            |
| 7723-14-0  | Phosphorus                                                | 4222                                 | mg/L  |                          | Yes      | Yes                    |                            |      |       | Yes            |
| 7726-95-6  | Bromine                                                   | 259                                  | mg/L  |                          | Yes      |                        |                            |      |       | Yes            |
| 7727-37-9  | Nitrogen                                                  | 96026                                | mg/L  | Yes                      | Yes      |                        |                            |      |       | Yes            |
| 7773-83-3  | 1-Docosanethiol                                           | Not Quantified                       |       |                          |          |                        |                            |      |       |                |
| 7782-49-2  | Selenium                                                  | 17                                   | mg/L  |                          | Yes      | Yes                    | Yes                        | Yes  | Yes   | Yes            |
| 77877-94-2 | Chloromethyl pentanoate                                   | Not Quantified                       |       |                          |          |                        |                            |      |       |                |
| 779-02-2   | 9-Methylanthracene                                        | Not Quantified                       |       |                          | Yes      |                        |                            |      |       |                |
| 77-90-7    | Acetyl tributyl citrate                                   | Not Quantified                       |       |                          | Yes      |                        |                            |      |       |                |
| 78-59-1    | Isophorone                                                | 0.015                                | mg/L  |                          | Yes      | Yes                    | Yes                        |      |       | Yes            |
| 78-67-1    | Azobisisobutyronitrile                                    | Not Quantified                       |       |                          | Yes      |                        |                            |      |       |                |
| 78-77-3    | 1-Bromo-2-methylpropane                                   | Not Quantified                       |       |                          | Yes      |                        |                            |      |       |                |
| 78-93-3    | Methyl ethyl ketone                                       | 0.51                                 | mg/L  |                          | Yes      | Yes                    |                            | Yes  |       | Yes            |
| 79-01-6    | Trichloroethylene                                         | 2.68                                 | mg/L  |                          | Yes      | Yes                    | Yes                        | Yes  | Yes   | Yes            |
| 79-03-8    | Propanoyl chloride                                        | Not Quantified                       |       |                          | Yes      |                        |                            |      |       |                |
| 79-06-1    | Acrylamide                                                | 99.2                                 | mg/L  | Yes                      | Yes      | Yes                    |                            | Yes  | Yes   | Yes            |
| 790-82-9   | 4,4'-Diacetyldiphenylmethane                              | 0.00037                              | mg/L  |                          |          |                        |                            |      |       |                |
| 79-09-4    | Propionic acid                                            | 33                                   | mg/L  |                          | Yes      |                        |                            |      |       | Yes            |
| 79273-13-5 | dispiro[4.2.4.2]tetradecane                               | Not Quantified                       |       |                          |          |                        |                            |      |       |                |
| 79-31-2    | 2-Methylpropanoic acid                                    | 4                                    | mg/L  |                          | Yes      |                        |                            |      |       |                |
| 79-34-5    | 1,1,2,2-Tetrachloroethane                                 | 0.005                                | mg/L  |                          | Yes      | Yes                    | Yes                        | Yes  |       | Yes            |
| 8001-54-5  | Benzalkonium chloride                                     | 1                                    | mg/L  | Yes                      | Yes      |                        |                            |      |       |                |
| 80-05-7    | Bisphenol A                                               | 0.01617                              | mg/L  | Yes                      | Yes      | Yes                    |                            |      |       | Yes            |
| 80061-31-0 | 3,4-Dihydro-1,9(2H,10H)-acridinedione                     | 0.00135                              | mg/L  |                          |          |                        |                            |      |       |                |
| 8008-20-6  | Kerosine                                                  | 0.2                                  | mg/L  | Yes                      | Yes      | Yes                    |                            |      |       | Yes            |
| 80625-32-7 | 1,e-8,z-10-pentadecatriene                                | Not Quantified                       |       |                          |          |                        |                            |      |       |                |
| 80-62-6    | Methyl methacrylate                                       | 0.03                                 | mg/L  |                          | Yes      | Yes                    |                            | Yes  |       | Yes            |
| 80655-44-3 | Decahydro-4,4,8,9,10-pentamethylnaphthalene               | Not Quantified                       |       |                          |          |                        |                            |      |       |                |
| 821-55-6   | 2-Nonanone                                                | Not Quantified                       |       |                          | Yes      |                        |                            |      |       |                |
| 82253-11-0 | 7-octylidenebicyclo[4.1.0]heptane                         | Not Quantified                       |       |                          |          |                        |                            |      |       |                |
| 823-17-6   | Cyclohexene, 3,5-dimethyl-                                | Not Quantified                       |       |                          |          |                        |                            |      |       |                |
| 823-22-3   | 2H-Pyran-2-one, tetrahydro-6-methyl-                      | Not Quantified                       |       |                          |          |                        |                            |      |       |                |
| 824-43-1   | (1R,2S)-1,2-Diethylcyclohexane                            | Not Quantified                       |       |                          |          |                        |                            |      |       |                |
| 825-44-5   | Benzo(b)thiophene 1,1-dioxide                             | Not Quantified                       |       |                          | Yes      |                        |                            |      |       |                |
| 825-51-4   | 2-Naphthalenol, decahydro-                                | Not Quantified                       |       |                          | Yes      |                        |                            |      |       |                |
| 826-18-6   | Benzene, 1-pentenyl-                                      | Not Quantified                       |       |                          |          |                        |                            |      |       |                |
| 82736-95-6 | 1,2,4-Triazine-3,5(2H,4H)-dione, 6-fluoro-                | Not Quantified                       |       |                          |          |                        |                            |      |       |                |
| 827-52-1   | Cyclohexylbenzene                                         | Not Quantified                       |       |                          | Yes      |                        |                            |      |       |                |

SI Table 4c: 1198 chemicals reported as being detected in produced water, summary data

| CAS #       | Name                                                       | Concentration data (Max Reported) | Units | FracFocus (2013-2017) | ToxvalDB | ToxVal (Restricted) | Priority Pollutant List | RCRA | NPDWS | Method exists? |
|-------------|------------------------------------------------------------|-----------------------------------|-------|-----------------------|----------|---------------------|-------------------------|------|-------|----------------|
| 829-20-9    | 1-(2,4-Dimethoxyphenyl)ethan-1-one                         | Not Quantified                    |       |                       |          |                     |                         |      |       |                |
| 829-26-5    | 2,3,6-Trimethylnaphthalene                                 | Not Quantified                    |       |                       | Yes      |                     |                         |      |       | Yes            |
| 830-09-1    | 4-Methoxycinnamic acid                                     | 0.00016                           | mg/L  |                       |          |                     |                         |      |       |                |
| 83173-76-6  | Benzenemethanol, 4-methyl-à-(1-methyl-2-propenyl)-, (R)    | Not Quantified                    |       |                       |          |                     |                         |      |       |                |
| 832-69-9    | 1-Methyl phenanthrene                                      | 0.000234                          | mg/L  |                       | Yes      |                     |                         |      |       | Yes            |
| 83-32-9     | Acenaphthene                                               | 0.28                              | mg/L  |                       | Yes      | Yes                 | Yes                     |      |       | Yes            |
| 83-33-0     | 1H-Inden-1-one, 2,3-dihydro-                               | Not Quantified                    |       |                       | Yes      |                     |                         |      |       |                |
| 84-66-2     | Diethyl phthalate                                          | 0.0149                            | mg/L  |                       | Yes      | Yes                 | Yes                     | Yes  |       | Yes            |
| 84-69-5     | Diisobutyl phthalate                                       | Not Quantified                    |       |                       | Yes      |                     |                         |      |       | Yes            |
| 84-74-2     | Dibutyl phthalate                                          | 0.0151                            | mg/L  |                       | Yes      | Yes                 | Yes                     | Yes  |       | Yes            |
| 84-77-5     | Didecyl phthalate                                          | 0.00723                           | mg/L  |                       | Yes      |                     |                         |      |       |                |
| 85-01-8     | Phenanthrene                                               | 1.2                               | mg/L  |                       | Yes      |                     | Yes                     |      |       | Yes            |
| 852228-22-9 | 1,54-Dibromotetrapentacontane                              | Not Quantified                    |       |                       |          |                     |                         |      |       |                |
| 85-68-7     | Benzyl butyl phthalate                                     | 0.0042                            | mg/L  |                       | Yes      | Yes                 | Yes                     | Yes  |       | Yes            |
| 85763-57-1  | 11-Methyldodecanol                                         | Not Quantified                    |       |                       |          |                     |                         |      |       |                |
| 86290-81-5  | Gasoline                                                   | 0.8                               | mg/L  |                       | Yes      |                     |                         |      |       | Yes            |
| 86-30-6     | N-Nitrosodiphenylamine                                     | 0.0017                            | mg/L  |                       | Yes      | Yes                 | Yes                     |      |       | Yes            |
| 86-55-5     | 1-Naphthalenecarboxylic acid                               | 0.96                              | mg/L  |                       | Yes      |                     |                         |      |       |                |
| 866-23-9    | Phosphonic acid, trichloromethyl-, diethyl ester           | Not Quantified                    |       |                       | Yes      |                     |                         |      |       |                |
| 866760-27-2 | (4Z)-2-Methyl-4-tetradecene                                | Not Quantified                    |       |                       |          |                     |                         |      |       |                |
| 86-73-7     | Fluorene                                                   | 0.51                              | mg/L  |                       | Yes      | Yes                 | Yes                     |      |       | Yes            |
| 871-83-0    | 2-Methylnonane                                             | Not Quantified                    |       |                       | Yes      |                     |                         |      |       |                |
| 87-41-2     | Phthalide                                                  | Not Quantified                    |       |                       | Yes      |                     |                         |      |       |                |
| 874-35-1    | 5-Methylindan                                              | Not Quantified                    |       |                       |          |                     |                         |      |       |                |
| 874-41-9    | 1,3-Dimethyl-4-ethylbenzene                                | Not Quantified                    |       |                       | Yes      |                     |                         |      |       |                |
| 87-61-6     | 1,2,3-Trichlorobenzene                                     | 0.0065                            | mg/L  |                       | Yes      | Yes                 |                         |      |       | Yes            |
| 87-65-0     | 2,6-Dichlorophenol                                         | Not Quantified                    |       |                       | Yes      |                     |                         | Yes  |       | Yes            |
| 877-44-1    | 1,2,4-Triethylbenzene                                      | Not Quantified                    |       |                       |          |                     |                         |      |       | Yes            |
| 879-12-9    | 1,2,3-Trimethylnaphthalene                                 | 0.004485087                       | mg/L  |                       |          |                     |                         |      |       |                |
| 88-18-6     | 2-tert-Butylphenol                                         | Not Quantified                    |       |                       | Yes      |                     |                         |      |       |                |
| 89-16-7     | Bis(8-methylnonyl) phthalate                               | Not Quantified                    |       |                       |          |                     |                         |      |       |                |
| 89-18-9     | Butyl 8-methylnonyl phthalate                              | Not Quantified                    |       |                       |          |                     |                         |      |       |                |
| 89656-98-4  | Cyclohexane, (2-methyl-1-propenyl)-                        | Not Quantified                    |       |                       |          |                     |                         |      |       |                |
| 89-74-7     | 1-(2,4-Dimethylphenyl)ethanone                             | Not Quantified                    |       |                       | Yes      |                     |                         |      |       |                |
| 9000-30-0   | Guar gum                                                   | Not Quantified                    |       | Yes                   | Yes      |                     |                         |      |       |                |
| 90-12-0     | 1-Methylnaphthalene                                        | 0.003                             | mg/L  |                       | Yes      | Yes                 |                         |      |       | Yes            |
| 90548-09-7  | Decahydro-1-methyl-2-methylenenaphthalene                  | Not Quantified                    |       |                       |          |                     |                         |      |       |                |
| 90565-51-8  | 2-butyl-4-methyl-1,6-dihydro-6-pyrimidone                  | Not Quantified                    |       |                       |          |                     |                         |      |       |                |
| 90832-26-1  | 4,5-Dihydro-à,à,4,4-tetramethyl-1H-pyrazole-1-propanol     | Not Quantified                    |       |                       |          |                     |                         |      |       |                |
| 90921-72-5  | N-Allyl-p-hydroxybenzamide                                 | Not Quantified                    |       |                       |          |                     |                         |      |       |                |
| 91-17-8     | Decalin                                                    | Not Quantified                    |       |                       | Yes      |                     |                         |      |       |                |
| 91-20-3     | Naphthalene                                                | 88.4                              | mg/L  | Yes                   | Yes      | Yes                 | Yes                     | Yes  |       | Yes            |
| 91-22-5     | Quinoline                                                  | Not Quantified                    |       | Yes                   | Yes      | Yes                 |                         |      |       | Yes            |
| 91242-57-8  | Cyclopentane, 1,2-dipropyl-                                | Not Quantified                    |       |                       |          |                     |                         |      |       |                |
| 912629-93-7 | (9E)-8-Methyl-9-tetradecen-1-yl acetate                    | Not Quantified                    |       |                       |          |                     |                         |      |       |                |
| 91531-54-3  | 1,1,3a-trimethyl-1a,3a,5,6-tetrahydro-1h-cyclopropa[c]pent | Not Quantified                    |       |                       |          |                     |                         |      |       |                |
| 91-57-6     | 2-Methylnaphthalene                                        | 110                               | mg/L  |                       | Yes      | Yes                 |                         |      |       | Yes            |
| 92013-16-6  | 1H-Indene, 2,3-dihydro-4-propyl-                           | Not Quantified                    |       |                       |          |                     |                         |      |       |                |
| 92-51-3     | Dicyclohexyl                                               | Not Quantified                    |       |                       | Yes      |                     |                         |      |       |                |
| 92513-28-5  | 3-Methylquinoline-2-carboxylic acid                        | 0.00665                           | mg/L  |                       |          |                     |                         |      |       |                |
| 92-52-4     | Biphenyl                                                   | 0.0242                            | mg/L  | Yes                   | Yes      | Yes                 |                         |      |       | Yes            |
| 925-60-0    | 2-Propenoic acid, propyl ester                             | Not Quantified                    |       |                       | Yes      |                     |                         |      |       |                |
| 92-87-5     | Benzidine                                                  | Not Quantified                    |       |                       | Yes      | Yes                 | Yes                     | Yes  |       | Yes            |
| 930-89-2    | (Z)-1-Ethyl-2-methylcyclopentane                           | Not Quantified                    |       |                       |          |                     |                         |      |       |                |
| 93-09-4     | 2-Naphthalenecarboxylic acid                               | 0.02582745                        | mg/L  |                       | Yes      |                     |                         |      |       |                |

SI Table 4c: 1198 chemicals reported as being detected in produced water, summary data

| CAS #        | Name                                             | Concentration data (Max Reported) | Units | FracFocus (2013-2017) | ToxvalDB | ToxVal (Restricted) | Priority Pollutant List | RCRA | NPDWS | Method exists? |
|--------------|--------------------------------------------------|-----------------------------------|-------|-----------------------|----------|---------------------|-------------------------|------|-------|----------------|
| 931-36-2     | 2-Ethyl-4-methyl-1H-imidazole                    | Not Quantified                    |       |                       |          |                     |                         |      |       |                |
| 932-40-1     | trans-1,2-Diethyl cyclopentane                   | Not Quantified                    |       |                       |          |                     |                         |      |       |                |
| 933-98-2     | 1-Ethyl-2,3-dimethylbenzene                      | Not Quantified                    |       |                       | Yes      |                     |                         |      |       |                |
| 934-34-9     | Benzothiazolone                                  | 0.0039                            | mg/L  |                       |          |                     |                         |      |       | Yes            |
| 934-80-5     | 1,2-Dimethyl-4-ethylbenzene                      | Not Quantified                    |       |                       | Yes      |                     |                         |      |       |                |
| 93-53-8      | Hydratropaldehyde                                | Not Quantified                    |       |                       | Yes      |                     |                         |      |       |                |
| 93-55-0      | 1-Phenylpropan-1-one                             | Not Quantified                    |       |                       | Yes      |                     |                         |      |       |                |
| 938-06-7     | (4aS,8aR)-4a-Methyloctahydronaphthalen-2(1H)-one | Not Quantified                    |       |                       |          |                     |                         |      |       |                |
| 93927-20-9   | 1-Ethyl-2-methylnaphthalene                      | 0.00055                           | mg/L  |                       |          |                     |                         |      |       |                |
| 939-27-5     | 2-Ethyl-naphthalene                              | Not Quantified                    |       |                       |          |                     |                         |      |       | Yes            |
| 941228-34-8  | 7-(Bromomethyl)pentadec-7-ene                    | 0.00277                           | mg/L  |                       |          |                     |                         |      |       |                |
| 94492-10-1   | 2-Dimethylamino-4-methyl-pent-4-enenitrile       | Not Quantified                    |       |                       |          |                     |                         |      |       |                |
| 94-59-7      | Safrole                                          | Not Quantified                    |       |                       | Yes      | Yes                 |                         | Yes  |       | Yes            |
| 949-41-7     | 1a,9b-Dihydro-1H-cyclopropa[1]phenanthrene       | Not Quantified                    |       |                       |          |                     |                         |      |       |                |
| 95-16-9      | Benzothiazole                                    | 0.01427                           | mg/L  |                       | Yes      |                     |                         |      |       | Yes            |
| 95-47-6      | o-Xylene                                         | 9430                              | mg/L  |                       | Yes      |                     |                         |      | Yes   | Yes            |
| 95-48-7      | o-Cresol                                         | 7.76                              | mg/L  |                       | Yes      | Yes                 |                         |      |       | Yes            |
| 95-50-1      | 1,2-Dichlorobenzene                              | 0.00068                           | mg/L  |                       | Yes      | Yes                 | Yes                     | Yes  | Yes   | Yes            |
| 95-63-6      | 1,2,4-Trimethylbenzene                           | 8730                              | mg/L  | Yes                   | Yes      | Yes                 |                         |      |       | Yes            |
| 95-65-8      | 3,4-Dimethylphenol                               | Not Quantified                    |       |                       | Yes      | Yes                 |                         |      |       | Yes            |
| 959028-24-1  | 4-Ethyl-2,3-dimethylhex-2-ene                    | Not Quantified                    |       |                       |          |                     |                         |      |       |                |
| 95906-11-9   | tris(2,4-di-tert-butylphenyl) phosphate          | Not Quantified                    |       |                       |          |                     |                         |      |       |                |
| 959103-74-3  | Undecyl heptafluorobutanoate                     | Not Quantified                    |       |                       |          |                     |                         |      |       |                |
| 95-93-2      | 1,2,4,5-Tetramethylbenzene                       | Not Quantified                    |       |                       | Yes      |                     |                         |      |       |                |
| 959-98-8     | Endosulfan I                                     | 0.0005                            | mg/L  |                       | Yes      |                     |                         |      |       | Yes            |
| 96-04-8      | 2,3-Heptanedione                                 | Not Quantified                    |       |                       |          |                     |                         |      |       |                |
| 96-76-4      | 2,4-Di-tert-butylphenol                          | 0.004941527                       | mg/L  |                       | Yes      |                     |                         |      |       |                |
| 97-72-3      | Isobutyric anhydride                             | Not Quantified                    |       |                       | Yes      |                     |                         |      |       |                |
| 98060-54-9   | Decane, trimethyl-                               | Not Quantified                    |       |                       |          |                     |                         |      |       |                |
| 98-06-6      | tert-Butylbenzene                                | 86                                | mg/L  |                       | Yes      | Yes                 |                         |      |       | Yes            |
| 98-54-4      | 4-tert-Butylphenol                               | 0.00019                           | mg/L  |                       | Yes      |                     |                         |      |       |                |
| 98-82-8      | Cumene                                           | 948                               | mg/L  | Yes                   | Yes      | Yes                 |                         |      |       | Yes            |
| 98-86-2      | Acetophenone                                     | 0.0011                            | mg/L  | Yes                   | Yes      | Yes                 |                         | Yes  |       | Yes            |
| 98-95-3      | Nitrobenzene                                     | 0.006                             | mg/L  |                       | Yes      | Yes                 | Yes                     | Yes  |       | Yes            |
| 99-06-9      | 3-Hydroxybenzoic acid                            | 0.03038684                        | mg/L  |                       | Yes      |                     |                         |      |       |                |
| 99133-89-8   | 4-Imidazolacetic acid, butyl ester               | Not Quantified                    |       |                       |          |                     |                         |      |       |                |
| 99328-46-8   | 5-Methyl-1-hepten-4-ol                           | Not Quantified                    |       |                       |          |                     |                         |      |       |                |
| 99-87-6      | p-Cymene                                         | 334                               | mg/L  |                       | Yes      |                     |                         |      |       | Yes            |
| NOCAS_24858  | m,p-Cresol mixture                               | Not Quantified                    |       |                       |          |                     |                         |      |       | Yes            |
| NOCAS_873040 | Tricyclo[4.4.0.0(3,9)]decane                     | 0.00026                           | mg/L  |                       |          |                     |                         |      |       |                |
| NOCAS_873049 | Tetrahydrophenanthrene                           | 0.00042                           | mg/L  |                       |          |                     |                         |      |       |                |
| NOCAS_873051 | Ethyltetrahydronaphthalene                       | 0.00046                           | mg/L  |                       |          |                     |                         |      |       |                |
| NOCAS_891518 | Nonylphenols                                     | Not Quantified                    |       |                       |          |                     |                         |      |       |                |

SI Table 5a: Summary of final 122 chemicals used for ToxPi prioritization based on availability of data: detected more than once; associated concentration data; having at least two types of toxicity data

| Reflid | CAS #     | Name                         | Concn (mg/L) | FracFocus (2013-2017) | Priority Pollutant List | RCRA | NPDWRs | Standard Method |
|--------|-----------|------------------------------|--------------|-----------------------|-------------------------|------|--------|-----------------|
| 5      | 100-41-4  | Ethylbenzene                 | 4410         | Yes                   | Yes                     |      | Yes    | Yes             |
| 9      | 100-42-5  | Styrene                      | 52           |                       |                         |      | Yes    | Yes             |
| 19     | 100-51-6  | Benzyl alcohol               | 0.34         |                       |                         |      |        | Yes             |
| 14     | 101-81-5  | Diphenylmethane              | 0.00043      |                       |                         |      |        |                 |
| 5      | 103-65-1  | Propylbenzene                | 1290         |                       |                         |      |        | Yes             |
| 5      | 104-51-8  | Butylbenzene                 | 162          |                       |                         |      |        | Yes             |
| 17     | 104-76-7  | 2-Ethyl-1-hexanol            | 0.041        | Yes                   |                         |      |        | Yes             |
| 15     | 105-60-2  | Caprolactam                  | 0.002392004  |                       |                         |      |        | Yes             |
| 5      | 105-67-9  | 2,4-Dimethylphenol           | 5            |                       | Yes                     | Yes  |        | Yes             |
| 10     | 106-42-3  | p-Xylene                     | 0.46         |                       |                         |      | Yes    | Yes             |
| 19     | 106-44-5  | p-Cresol                     | 0.3          |                       |                         |      |        | Yes             |
| 17     | 106-46-7  | 1,4-Dichlorobenzene          | 0.00034      |                       | Yes                     | Yes  | Yes    | Yes             |
| 7      | 106-65-0  | Dimethyl succinate           | 0.8914662    | Yes                   |                         |      |        |                 |
| 17     | 107-21-1  | Ethylene glycol              | 290          | Yes                   |                         |      |        | Yes             |
| 12     | 107-92-6  | Butanoic acid                | 19           |                       |                         |      |        |                 |
| 16     | 108-10-1  | 4-Methyl-2-pentanone         | 1.44         | Yes                   |                         |      |        | Yes             |
| 17     | 108-38-3  | m-Xylene                     | 0.111        | Yes                   |                         |      | Yes    | Yes             |
| 5      | 108-67-8  | 1,3,5-Trimethylbenzene       | 6250         | Yes                   |                         |      |        | Yes             |
| 5      | 108-88-3  | Toluene                      | 16800        | Yes                   | Yes                     | Yes  | Yes    | Yes             |
| 5      | 108-95-2  | Phenol                       | 6.96         | Yes                   |                         | Yes  |        | Yes             |
| 18     | 110-75-8  | 2-Chloroethyl vinyl ether    | 0.014        |                       | Yes                     | Yes  |        | Yes             |
| 17     | 110-86-1  | Pyridine                     | 0.28         |                       |                         | Yes  |        | Yes             |
| 7      | 110-94-1  | Glutaric acid                | 0.290653     |                       |                         |      |        |                 |
| 7      | 111-14-8  | Heptanoic acid               | 0.3124488    |                       |                         |      |        |                 |
| 9      | 111-76-2  | 2-Butoxyethanol              | 77.5         | Yes                   |                         |      |        | Yes             |
| 17     | 1120-21-4 | Undecane                     | 0.0113       | Yes                   |                         |      |        |                 |
| 17     | 112-30-1  | 1-Decanol                    | 0.0054       | Yes                   |                         |      |        |                 |
| 14     | 112-34-5  | 2-(2-Butoxyethoxy)ethanol    | 0.00045      | Yes                   |                         |      |        |                 |
| 19     | 112-40-3  | Dodecane                     | 2.33         | Yes                   |                         |      |        | Yes             |
| 1      | 112-88-9  | 1-Octadecene                 | 0.0463       | Yes                   |                         |      |        |                 |
| 15     | 115-86-6  | Triphenyl phosphate          | 0.00677137   |                       |                         |      |        | Yes             |
| 19     | 117-81-7  | Di(2-ethylhexyl) phthalate   | 0.042        | Yes                   | Yes                     | Yes  | Yes    | Yes             |
| 17     | 117-84-0  | Di-n-octyl phthalate         | 0.0093       |                       | Yes                     | Yes  |        | Yes             |
| 7      | 118-90-1  | 2-Methylbenzoic acid         | 0.21784      |                       |                         |      |        |                 |
| 17     | 119-64-2  | Tetralin                     | 0.00895      |                       |                         |      |        |                 |
| 4      | 120-12-7  | Anthracene                   | 0.029        |                       | Yes                     |      |        | Yes             |
| 17     | 120-82-1  | 1,2,4-Trichlorobenzene       | 0.0015       |                       | Yes                     | Yes  | Yes    | Yes             |
| 7      | 121-91-5  | 1,3-Benzenedicarboxylic acid | 0.3821036    |                       |                         |      |        |                 |
| 14     | 122-39-4  | Diphenylamine                | 0.00373      |                       |                         | Yes  |        | Yes             |
| 7      | 123-25-1  | Diethyl butanedioate         | 1.4109876    |                       |                         |      |        |                 |
| 12     | 123-91-1  | 1,4-Dioxane                  | 0.06         | Yes                   |                         | Yes  |        | Yes             |
| 7      | 124-07-2  | Octanoic acid                | 0.08220198   |                       |                         |      |        |                 |
| 19     | 124-18-5  | Decane                       | 2.67         | Yes                   |                         |      |        | Yes             |
| 14     | 126-73-8  | Tributyl phosphate           | 0.01896      | Yes                   |                         |      |        | Yes             |
| 17     | 127-18-4  | Tetrachloroethylene          | 0.005        |                       | Yes                     | Yes  | Yes    | Yes             |
| 4      | 129-00-0  | Pyrene                       | 0.23         |                       | Yes                     |      |        | Yes             |
| 12     | 131-11-3  | Dimethyl phthalate           | 0.015        |                       | Yes                     | Yes  |        | Yes             |

SI Table 5a: Summary of final 122 chemicals used for ToxPi prioritization based on availability of data: detected more than once; associated concentration data; having at least two types of toxicity data

| Reflid | CAS #      | Name                               | Concn (mg/L) | FracFocus (2013-2017) | Priority Pollutant List | RCRA | NPDWRs | Standard Method |
|--------|------------|------------------------------------|--------------|-----------------------|-------------------------|------|--------|-----------------|
| 5      | 1319-77-3  | Cresol                             | 6.76         |                       |                         | Yes  |        |                 |
| 19     | 132-65-0   | Dibenzothiophene                   | 0.0144       |                       |                         |      |        | Yes             |
| 19     | 1330-20-7  | Xylenes                            | 11           | Yes                   |                         |      | Yes    | Yes             |
| 5      | 135-98-8   | sec-Butylbenzene                   | 270          |                       |                         |      |        | Yes             |
| 15     | 140-66-9   | 4-(1,1,3,3-Tetramethylbutyl)phenol | 0.018338478  |                       |                         |      |        | Yes             |
| 7      | 142-62-1   | Hexanoic acid                      | 0.766656     |                       |                         |      |        | Yes             |
| 15     | 143-07-7   | Dodecanoic acid                    | 0.002517211  |                       |                         |      |        |                 |
| 4      | 191-24-2   | Benzo(g,h,i)perylene               | 0.0015       |                       | Yes                     |      |        | Yes             |
| 4      | 193-39-5   | Indeno(1,2,3-cd)pyrene             | 0.022        |                       | Yes                     | Yes  |        | Yes             |
| 4      | 205-99-2   | Benzo(b)fluoranthene               | 0.006        |                       | Yes                     | Yes  |        | Yes             |
| 4      | 206-44-0   | Fluoranthene                       | 0.035        |                       | Yes                     | Yes  |        | Yes             |
| 4      | 207-08-9   | Benzo(k)fluoranthene               | 0.0049       |                       |                         | Yes  |        | Yes             |
| 4      | 208-96-8   | Acenaphthylene                     | 0.11         |                       | Yes                     |      |        | Yes             |
| 4      | 218-01-9   | Chrysene                           | 0.11         |                       | Yes                     | Yes  |        | Yes             |
| 8      | 2381-21-7  | 1-Methylpyrene                     | 0.0000477    |                       |                         |      |        | Yes             |
| 15     | 28804-88-8 | Dimethylnaphthalene                | 0.009506014  |                       |                         |      |        |                 |
| 17     | 319-86-8   | delta-Hexachlorocyclohexane        | 0.000048     |                       | Yes                     |      |        | Yes             |
| 14     | 3386-33-2  | Octadecyl chloride                 | 0.00212      |                       |                         |      |        |                 |
| 17     | 496-11-7   | Indan                              | 0.0096       |                       |                         |      |        |                 |
| 4      | 50-32-8    | Benzo(a)pyrene                     | 0.035        |                       | Yes                     | Yes  | Yes    | Yes             |
| 18     | 503-74-2   | Isovaleric acid                    | 0.96         |                       |                         |      |        |                 |
| 4      | 53-70-3    | Dibenz(a,h)anthracene              | 0.023        |                       | Yes                     | Yes  |        | Yes             |
| 15     | 544-63-8   | Tetradecanoic acid                 | 0.005315497  |                       |                         |      |        |                 |
| 19     | 544-76-3   | Hexadecane                         | 0.601        | Yes                   |                         |      |        | Yes             |
| 4      | 56-55-3    | Benz(a)anthracene                  | 0.017        |                       | Yes                     | Yes  |        | Yes             |
| 15     | 57-10-3    | Hexadecanoic acid                  | 0.003021193  |                       |                         |      |        |                 |
| 15     | 57-11-4    | Octadecanoic acid                  | 0.00373392   |                       |                         |      |        |                 |
| 17     | 57-55-6    | 1,2-Propylene glycol               | 110          | Yes                   |                         |      |        | Yes             |
| 17     | 611-14-3   | 1-Ethyl-2-methylbenzene            | 0.0061       |                       |                         |      |        | Yes             |
| 17     | 629-50-5   | Tridecane                          | 0.0524       | Yes                   |                         |      |        |                 |
| 19     | 629-59-4   | Tetradecane                        | 0.948        | Yes                   |                         |      |        | Yes             |
| 12     | 64-19-7    | Acetic acid                        | 1600         | Yes                   |                         |      |        | Yes             |
| 3      | 65-85-0    | Benzoic acid                       | 1.03         | Yes                   |                         |      |        | Yes             |
| 17     | 67-56-1    | Methanol                           | 428          | Yes                   |                         |      |        | Yes             |
| 17     | 67-63-0    | Isopropanol                        | 83           | Yes                   |                         |      |        | Yes             |
| 16     | 67-64-1    | Acetone                            | 21.7         | Yes                   |                         |      |        | Yes             |
| 5      | 71-43-2    | Benzene                            | 860          | Yes                   | Yes                     | Yes  | Yes    | Yes             |
| 5      | 75-09-2    | Dichloromethane                    | 0.51         | Yes                   | Yes                     | Yes  | Yes    | Yes             |
| 17     | 75-34-3    | 1,1-Dichloroethane                 | 0.005        |                       | Yes                     | Yes  |        | Yes             |
| 6      | 7553-56-2  | Iodine                             | 385          |                       |                         |      |        | Yes             |
| 2      | 7631-86-9  | Silica                             | 225          | Yes                   |                         |      |        | Yes             |
| 19     | 78-93-3    | Methyl ethyl ketone                | 0.51         |                       |                         | Yes  |        | Yes             |
| 12     | 79-09-4    | Propionic acid                     | 33           |                       |                         |      |        | Yes             |
| 11     | 79-31-2    | 2-Methylpropanoic acid             | 4            |                       |                         |      |        |                 |
| 18     | 79-34-5    | 1,1,2,2-Tetrachloroethane          | 0.005        |                       | Yes                     | Yes  |        | Yes             |
| 14     | 80-05-7    | Bisphenol A                        | 0.01617      | Yes                   |                         |      |        | Yes             |
| 18     | 80-62-6    | Methyl methacrylate                | 0.03         |                       |                         | Yes  |        | Yes             |

SI Table 5a: Summary of final 122 chemicals used for ToxPi prioritization based on availability of data: detected more than once; associated concentration data; having at least two types of toxicity data

| RefId | CAS #    | Name                    | Concn (mg/L) | FracFocus (2013-2017) | Priority Pollutant List | RCRA | NPDWRs | Standard Method |
|-------|----------|-------------------------|--------------|-----------------------|-------------------------|------|--------|-----------------|
| 8     | 832-69-9 | 1-Methyl phenanthrene   | 0.000234     |                       |                         |      |        | Yes             |
| 4     | 83-32-9  | Acenaphthene            | 0.28         |                       | Yes                     |      |        | Yes             |
| 14    | 84-66-2  | Diethyl phthalate       | 0.0149       |                       | Yes                     | Yes  |        | Yes             |
| 19    | 84-74-2  | Dibutyl phthalate       | 0.0151       |                       | Yes                     | Yes  |        | Yes             |
| 14    | 84-77-5  | Didecyl phthalate       | 0.00723      |                       |                         |      |        |                 |
| 4     | 85-01-8  | Phenanthrene            | 1.2          |                       | Yes                     |      |        | Yes             |
| 12    | 85-68-7  | Benzyl butyl phthalate  | 0.0042       |                       | Yes                     | Yes  |        | Yes             |
| 17    | 86-30-6  | N-Nitrosodiphenylamine  | 0.0017       |                       | Yes                     |      |        | Yes             |
| 4     | 86-73-7  | Fluorene                | 0.51         |                       | Yes                     |      |        | Yes             |
| 17    | 87-61-6  | 1,2,3-Trichlorobenzene  | 0.0065       |                       |                         |      |        | Yes             |
| 18    | 90-12-0  | 1-Methylnaphthalene     | 0.003        |                       |                         |      |        | Yes             |
| 13    | 91-20-3  | Naphthalene             | 88.4         | Yes                   | Yes                     | Yes  |        | Yes             |
| 5     | 91-57-6  | 2-Methylnaphthalene     | 110          |                       |                         |      |        | Yes             |
| 19    | 92-52-4  | Biphenyl                | 0.0242       | Yes                   |                         |      |        | Yes             |
| 14    | 95-16-9  | Benzothiazole           | 0.01427      |                       |                         |      |        | Yes             |
| 5     | 95-47-6  | o-Xylene                | 9430         |                       |                         |      | Yes    | Yes             |
| 5     | 95-48-7  | o-Cresol                | 7.76         |                       |                         |      |        | Yes             |
| 17    | 95-50-1  | 1,2-Dichlorobenzene     | 0.00068      |                       | Yes                     | Yes  | Yes    | Yes             |
| 5     | 95-63-6  | 1,2,4-Trimethylbenzene  | 8730         | Yes                   |                         |      |        | Yes             |
| 17    | 959-98-8 | Endosulfan I            | 0.0005       |                       |                         |      |        | Yes             |
| 15    | 96-76-4  | 2,4-Di-tert-butylphenol | 0.004941527  |                       |                         |      |        |                 |
| 5     | 98-06-6  | tert-Butylbenzene       | 86           |                       |                         |      |        | Yes             |
| 14    | 98-54-4  | 4-tert-Butylphenol      | 0.00019      |                       |                         |      |        |                 |
| 5     | 98-82-8  | Cumene                  | 948          | Yes                   |                         |      |        | Yes             |
| 17    | 98-86-2  | Acetophenone            | 0.0011       | Yes                   |                         | Yes  |        | Yes             |
| 18    | 98-95-3  | Nitrobenzene            | 0.006        |                       | Yes                     | Yes  |        | Yes             |
| 7     | 99-06-9  | 3-Hydroxybenzoic acid   | 0.03038684   |                       |                         |      |        |                 |
| 5     | 99-87-6  | p-Cymene                | 334          |                       |                         |      |        | Yes             |

SI Table 5b: Reference IDs

| RefId | Citation                                                                                                                                                                                                                                                                                                                                                                                                                                                                        |
|-------|---------------------------------------------------------------------------------------------------------------------------------------------------------------------------------------------------------------------------------------------------------------------------------------------------------------------------------------------------------------------------------------------------------------------------------------------------------------------------------|
| 1     | Bell, E.A., Poynor, T.E., Newhart, K.B., Regnery, J., Coday, B.D., Cath, T.Y., 2017. Produced water treatment using forward osmosis membranes: Evaluation of extended-time performance and fouling. <i>Journal of Membrane Science</i> 525, 77–88. <a href="https://doi.org/10.1016/j.memsci.2016.10.032">https://doi.org/10.1016/j.memsci.2016.10.032</a>                                                                                                                      |
| 2     | Breit, G.N., Kharaka, Y.K., Zielinski, R.A., Rice, C.A., Smith, B.D., Ridgley, J.L., 1997. US Geological Survey studies of water co-produced with oil and gas: implications for future petroleum resource development. Presented at the SPE/EPA Exploration and Production Environmental Conference, Dallas, Texas.                                                                                                                                                             |
| 3     | Carey, J., Zaidi, A., Ribo, J., 1992. Specific Toxic Organics in Produced Waters from In-Situ Heavy Oil Recovery Operations in Western Canada, in: Ray, J.P., Engelhardt, F.R. (Eds.), <i>Produced Water</i> . Plenum Press, New York, NY, pp. 133–150. <a href="https://doi.org/10.1007/978-1-4615-2902-6_11">https://doi.org/10.1007/978-1-4615-2902-6_11</a>                                                                                                                 |
| 4     | Chittick, E.A., Srebotnjak, T., 2017. An analysis of chemicals and other constituents found in produced water from hydraulically fractured wells in California and the challenges for wastewater management. <i>Journal of Environmental Management</i> 204, 502–509. <a href="https://doi.org/10.1016/j.jenvman.2017.09.002">https://doi.org/10.1016/j.jenvman.2017.09.002</a>                                                                                                 |
| 5     | DiGiulio, D.C., Jackson, R.B., 2016. Impact to Underground Sources of Drinking Water and Domestic Wells from Production Well Stimulation and Completion Practices in the Pavillion, Wyoming, Field. <i>Environmental Science &amp; Technology</i> 50, 4524–4536. <a href="https://doi.org/10.1021/acs.est.5b04970">https://doi.org/10.1021/acs.est.5b04970</a>                                                                                                                  |
| 6     | Engle, M.A., Reyes, F.R., Varonka, M.S., Orem, W.H., Ma, L., Ianno, A.J., Schell, T.M., Xu, P., Carroll, K.C., 2016. Geochemistry of formation waters from the Wolfcamp and “Cline” shales: Insights into brine origin, reservoir connectivity, and fluid flow in the Permian Basin, USA. <i>Chemical Geology</i> 425, 76–92. <a href="https://doi.org/10.1016/j.chemgeo.2016.01.025">https://doi.org/10.1016/j.chemgeo.2016.01.025</a>                                         |
| 7     | Gieg, L.M., Davidova, I.A., Duncan, K.E., Sufita, J.M., 2010. Methanogenesis, sulfate reduction and crude oil biodegradation in hot Alaskan oilfields: Methanogenic crude oil biodegradation in hot oilfields. <i>Environmental Microbiology</i> 12, 3074–3086. <a href="https://doi.org/10.1111/j.1462-2920.2010.02282.x">https://doi.org/10.1111/j.1462-2920.2010.02282.x</a>                                                                                                 |
| 8     | He, Y., Flynn, S.L., Folkerts, E.J., Zhang, Y., Ruan, D., Alessi, D.S., Martin, J.W., Goss, G.G., 2017. Chemical and toxicological characterizations of hydraulic fracturing flowback and produced water. <i>Water Research</i> 114, 78–87. <a href="https://doi.org/10.1016/j.watres.2017.02.027">https://doi.org/10.1016/j.watres.2017.02.027</a>                                                                                                                             |
| 9     | Kassotis, C.D., Klemp, K.C., Vu, D.C., Lin, C.-H., Meng, C.-X., Besch-Williford, C.L., Pinatti, L., Zoeller, R.T., Drobnis, E.Z., Balise, V.D., Isiguzo, C.J., Williams, M.A., Tillitt, D.E., Nagel, S.C., 2015. Endocrine-Disrupting Activity of Hydraulic Fracturing Chemicals and Adverse Health Outcomes After Prenatal Exposure in Male Mice. <i>Endocrinology</i> 156, 4458–4473. <a href="https://doi.org/10.1210/en.2015-1375">https://doi.org/10.1210/en.2015-1375</a> |
| 10    | Khan, N.A., Engle, M., Dungan, B., Holguin, F.O., Xu, P., Carroll, K.C., 2016. Volatile-organic molecular characterization of shale-oil produced water from the Permian Basin. <i>Chemosphere</i> 148, 126–136. <a href="https://doi.org/10.1016/j.chemosphere.2015.12.116">https://doi.org/10.1016/j.chemosphere.2015.12.116</a>                                                                                                                                               |
| 11    | Kharaka, Y.K., Maest, A.S., Carothers, W.W., Law, L.M., Lamothe, P.J., Fries, T.L., 1987. Geochemistry of metal-rich brines from central Mississippi Salt Dome basin, U.S.A. <i>Applied Geochemistry</i> 2, 543–561. <a href="https://doi.org/10.1016/0883-2927(87)90008-4">https://doi.org/10.1016/0883-2927(87)90008-4</a>                                                                                                                                                    |
| 12    | Lester, Y., Ferrer, I., Thurman, E.M., Sitterley, K.A., Korak, J.A., Aiken, G., Linden, K.G., 2015. Characterization of hydraulic fracturing flowback water in Colorado: Implications for water treatment. <i>Science of The Total Environment</i> 512–513, 637–644. <a href="https://doi.org/10.1016/j.scitotenv.2015.01.043">https://doi.org/10.1016/j.scitotenv.2015.01.043</a>                                                                                              |
| 13    | Lyman, S.N., Mansfield, M.L., Tran, H.N.Q., Evans, J.D., Jones, C., O’Neil, T., Bowers, R., Smith, A., Keslar, C., 2018. Emissions of organic compounds from produced water ponds I: Characteristics and speciation. <i>Science of The Total Environment</i> 619–620, 896–905. <a href="https://doi.org/10.1016/j.scitotenv.2017.11.161">https://doi.org/10.1016/j.scitotenv.2017.11.161</a>                                                                                    |

## SI Table 5b: Reference IDs

| RefId | Citation                                                                                                                                                                                                                                                                                                                                                                            |
|-------|-------------------------------------------------------------------------------------------------------------------------------------------------------------------------------------------------------------------------------------------------------------------------------------------------------------------------------------------------------------------------------------|
| 14    | Orem, W.H., Tatu, C.A., Lerch, H.E., Rice, C.A., Bartos, T.T., Bates, A.L., Tewalt, S., Corum, M.D., 2007. Organic compounds in produced waters from coalbed natural gas wells in the Powder River Basin, Wyoming, USA. <i>Applied Geochemistry</i> 22, 2240–2256. <a href="https://doi.org/10.1016/j.apgeochem.2007.04.010">https://doi.org/10.1016/j.apgeochem.2007.04.010</a>    |
| 15    | Pashin, J.C., McIntyre-Redden, M.R., Mann, S.D., Kopaska-Merkel, D.C., Varonka, M., Orem, W., 2014b. Relationships between water and gas chemistry in mature coalbed methane reservoirs of the Black Warrior Basin. <i>International Journal of Coal Geology</i> 126, 92–105. <a href="https://doi.org/10.1016/j.coal.2013.10.002">https://doi.org/10.1016/j.coal.2013.10.002</a>   |
| 16    | Rosenblum, J., Thurman, E.M., Ferrer, I., Aiken, G., Linden, K.G., 2017b. Organic Chemical Characterization and Mass Balance of a Hydraulically Fractured Well: From Fracturing Fluid to Produced Water over 405 Days. <i>Environmental Science &amp; Technology</i> 51, 14006–14015. <a href="https://doi.org/10.1021/acs.est.7b03362">https://doi.org/10.1021/acs.est.7b03362</a> |
| 17    | Shih, J.-S., Saiers, J.E., Anisfeld, S.C., Chu, Z., Muehlenbachs, L.A., Olmstead, S.M., 2015. Characterization and Analysis of Liquid Waste from Marcellus Shale Gas Development. <i>Environmental Science &amp; Technology</i> 49, 9557–9565. <a href="https://doi.org/10.1021/acs.est.5b01780">https://doi.org/10.1021/acs.est.5b01780</a>                                        |
| 18    | Sirivedhin, T., Dallbauman, L., 2004. Organic matrix in produced water from the Osage-Skiatook Petroleum Environmental Research site, Osage county, Oklahoma. <i>Chemosphere</i> 57, 463–469. <a href="https://doi.org/10.1016/j.chemosphere.2004.05.034">https://doi.org/10.1016/j.chemosphere.2004.05.034</a>                                                                     |
| 19    | Wesolowski, D., Broughton, A., Hansotte, C.A., Koraido, S.M., Fillo, J.P., 1987. Characterization of Produced Waters from Natural Gas Production Operations (No. GRI-87/0335.3). Gas Research Institute, Chicago, Illinois.                                                                                                                                                         |
